# Supplementary material for: Quinoline-5,8-Dione CDC25 Inhibitors: Potent Anti-Cancer Agents in Leukemia and Patient-Derived Colorectal Organoids
Source: Research Square preprint supplement (doi:10.21203/rs.3.rs-6282946/v1), 2025-07-09
Supplement: Supplementary file 1 [file a06d539dafc875a7727a53be.docx]

**Supporting Information**

**Quinoline-5,8-Dione CDC25 Inhibitors: Potent Anti-Cancer Agents in Leukemia and Patient-Derived Colorectal Organoids**

Iin Narwantia,b,1, Zih-Yao Yuc,1, [Bidyadhar Sethy](https://www.frontiersin.org/people/u/1042062)a, Pei-Ling Zhengc, Li-Hsin Chengd,e, Kelvin K. Tsaid,e, Sung-Bau Leec,f*, Jing-Ping Liou a,c,f*

a School of Pharmacy, College of Pharmacy, Taipei Medical University, Taipei, Taiwan.

b Faculty of Pharmacy, Universitas Ahmad Dahlan, Yogyakarta, Indonesia.

c Ph.D. Program in Drug Discovery and Development Industry, College of Pharmacy, Taipei Medical University, Taipei, Taiwan.

dLaboratory of Advanced Molecular Therapeutics, Graduate Institute of Clinical Medicine, College of Medicine, Taipei Medical University, Taipei 110, Taiwan

eCore Laboratory of Organoids Technology, Office of R&D, Taipei Medical University, Taiwan

f TMU Research Center for Drug Discovery, Taipei Medical University, Taipei, Taiwan.

**Address correspondence to:**

* Jing-Ping Liou, School of Pharmacy, College of Pharmacy, Taipei Medical University, 250 Wu-Hsing Street, Taipei 110, Taiwan. E-mail: [jpl@tmu.edu.tw](mailto:jpl@tmu.edu.tw)

*Sung-Bau Lee, Ph.D. Program in Drug Discovery and Development Industry, College of Pharmacy, Taipei Medical University, 250 Wu-Hsing Street, Taipei 110, Taiwan. E-mail: [sbl@tmu.edu.tw](mailto:sbl@tmu.edu.tw)

1 These authors contributed equally to this work.

**Contents**

List of tables

[Table S1. Cytotoxicity of synthesized compounds in colorectal cancer cancer cells (%) 3](#_Toc191900299)

[Table S2. IC50 values against CRC cell lines (HCT116 and DLD-1 cell lines) 4](#_Toc191900300)

[Table S3. Physicochemical properties, pharmacokinetic properties, and drug-likeness of compounds **6a, 6b, D1b, D3a, D3b, D11a,** and **D11b** calculated using the web-based SwissADME tool 60](#_Toc191900301)

# List of Figures

[Figure S1. **D1b** and **D11b** treatment triggers significant apoptosis in HCT116 cells. 5](#_Toc191900303)

[Figure S2. **D3a** and **D11a** impede CDK1 dephosphorylation and mitosis progression in HL-60 cells. 6](#_Toc191900304)

[Figure S3. **D1b**, **D3b**, and **D11b** prevent dephosphorylation of CDK1 and activation of mitotic signaling in HCT116 cells. 7](#_Toc191900305)

[Figure S4. Treatment of selected compounds leads to cell cycle arrest or delay in HCT116 cells. 8](#_Toc191900306)

[Figure S5. **D3a** and **D11a** suppress H4K20 methylation in HL-60 cells. 9](#_Toc191900307)

[Figure S6. **D11b** treatment suppresses H4K20 methylation in HCT116 cells. 10](#_Toc191900308)

[Figure S7. **D11b** induces a high level of DNA damage in K-562 and HCT116 cells**.** 11](#_Toc191900309)

[Figure S8. 1H-NMR, 13C-NMR, HRMS spectra,3 and HPLC profile of Final Compounds 12](#_Toc191900310)

# Table S1. Cytotoxicity of synthesized compounds in colorectal cancer cancer cells (%)

| Compounds | Cell viability (%) | |
| --- | --- | --- |
| **CRC cell lines** | |
| **HCT116** | **DLD-1** |
| **6a** | 79.9±5 | 98±3.2 |
| **D1a** | 78.5±2 | 89.4±5.5 |
| **D1b** | 2.1±0.8 | 0.25±0.33 |
| **D2a** | 2.1±1.3 | 1.6±1.1 |
| **D2b** | 2.5±0.7 | 8.9±1.3 |
| **D3a** | 5.7±2.7 | 0.78±0.51 |
| **D3b** | 2.5±0.3 | 0.87±0.35 |
| **D4a** | 71.9±0.9 | 84.5±3 |
| **D4b** | 93±9.1 | 93.4±7.4 |
| **D5a** | 74.7±3.9 | 86.6±4.6 |
| **D5b** | 4.5±0.9 | 3.4±1.3 |
| **D6a** | 89.4±2 | 104.2±3.3 |
| **D6b** | 96±7.5 | 97.8±4.2 |
| **D7a** | 85±3.1 | 106.2±5 |
| **D7b** | 3.3±0.46 | 36.8±5.1 |
| **D8a** | 82.9±4.2 | 95.7±4.5 |
| **D8b** | 31.6±7 | 7.8±1.8 |
| **D9a** | 58.2±3.7 | 35.3±8.7 |
| **D9b** | 25.9±2.4 | 67.9±3.5 |
| **D10a** | 69.2±2.9 | 66.6±7.3 |
| **D10a** | 91.7±4.2 | 94.2±4.7 |
| **D11a** | 1.2±0.5 | 0.57±0.66 |
| **D11b** | 0.98±0.63 | BDL |
| **D12a** | 84.3±2.1 | 102.1±6.8 |
| **D12b** | 92±2.1 | 98.4±7.3 |
| **DMSO** | 100±1.1 | 100±4.3 |

HCT116 and DLD-1 were treated with 2 μM of indicated compounds for 72h, and the percentages of surviving cells were determined by MTS assay. Results are shown as means with SDs from at least two independent experiments (*n* ≥ 5). BDL: Below detection limit.

Table S2. IC50 values against CRC cell lines (HCT116 and DLD-1 cell lines)

| **Compounds** | **IC50 (μM)** | |
| --- | --- | --- |
| **HCT116** | **DLD-1** |
| **D1b** | 0.48±0.1 | 0.38±0.004 |
| **D2a** | 1.43±0.16 | 0.76±0.1 |
| **D2b** | 0.88±0.11 | 1.29±0.02 |
| **D3a** | 1.5±0.09 | 0.74±0.03 |
| **D3b** | 1.13±0.12 | 0.65±0.008 |
| **D5b** | 0.83±0.12 | 0.84±0.08 |
| **D7b** | 0.83±0.11 | 1.77±0.15 |
| **D11a** | 1.14±0.1 | 0.56±0.02 |
| **D11b** | 0.17±0.02 | 0.13±0.006 |

# HCT116 and DLD-1 were treated with indicated compounds for 72 h, and the half maximal inhibitory concentration (IC50) values were determined by MTS assay. Results are shown as means with SDs from at least two independent experiments (n ≥ 6).

Figure S1. **D1b** and **D11b** treatment triggers significant apoptosis in HCT116 cells.


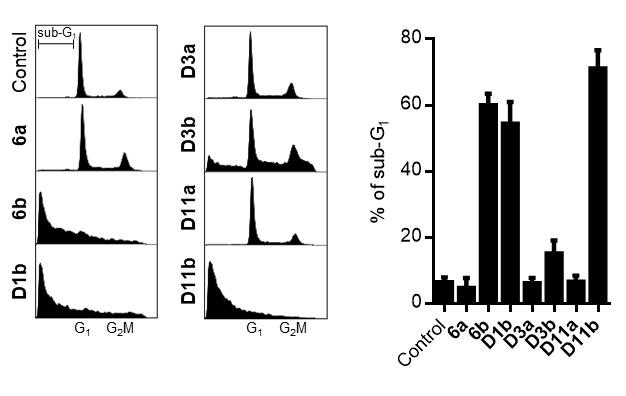


Analysis of cell cycle profiles of HCT116 cells treated with 2 μM of indicated compounds for 72 h. Representative profiles (left) and percentages of the sub-G1 population from at least three biological replicates (right) are shown and displayed with means and SDs (n = 3).

Figure S2. **D3a** and **D11a** impede CDK1 dephosphorylation and mitosis progression in HL-60 cells.


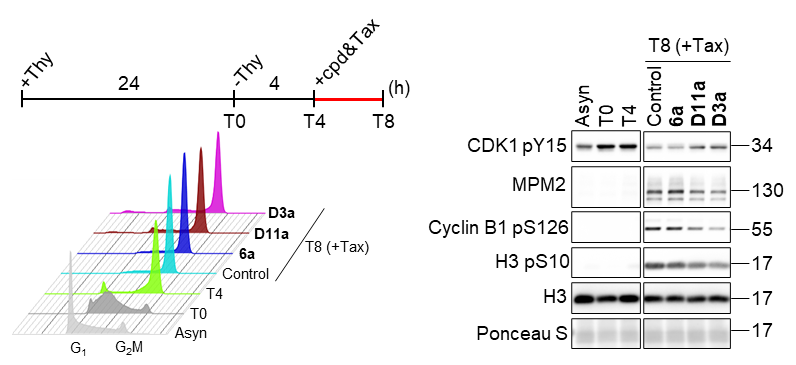


Analysis of cell cycle progression and mitotic signaling of thymidine-synchronized HL-60 cells co-treated with 0.2 μM of Taxol and 0.75 μM of indicated compounds. Experimental design (left upper) and representative results of FACS (left lower) and Western blot (right) from one of two biological replicates are shown. Asyn: Asynchronous; cpd: Compound; Tax: Taxol; Thy: Thymidine.

Figure S3. **D1b**, **D3b**, and **D11b** prevent dephosphorylation of CDK1 and activation of mitotic signaling in HCT116 cells.


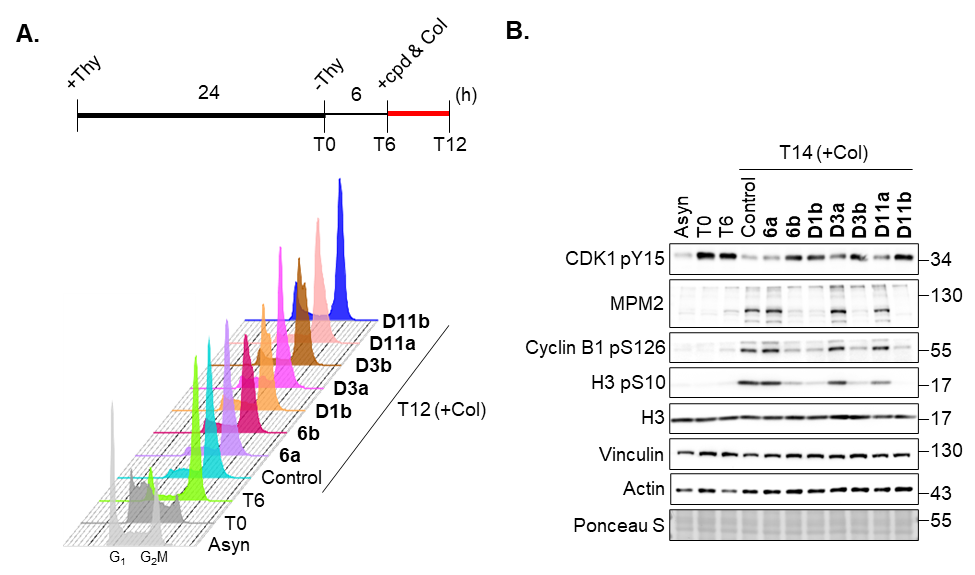


(A) Analysis of cell cycle progression of thymidine-synchronized HCT116 cells co-treated with 0.2 μM of colchicine and 2 μM of indicated compounds. Experimental design (upper) and representative results from one of two biological replicates (lower) are shown. (B) Analysis of mitotic signaling in HCT116 cells treated as (A). Representative results from one of two biological replicates are shown. Asyn: Asynchronous; Cpd: Compound; Col: Colchicine; Thy: Thymidine.

Figure S4. Treatment of selected compounds leads to cell cycle arrest or delay in HCT116 cells.


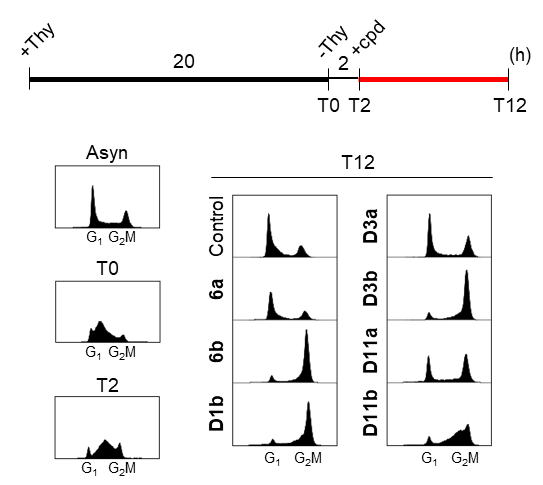


Analysis of cell cycle progression of thymidine-synchronized HCT116 cells treated with 2 μM. Experimental design (upper) and representative results from one of two biological replicates (lower) are shown. Asyn: Asynchronous; Cpd: Compound; Thy: Thymidine.

Figure S5. **D3a** and **D11a** suppress H4K20 methylation in HL-60 cells.

**
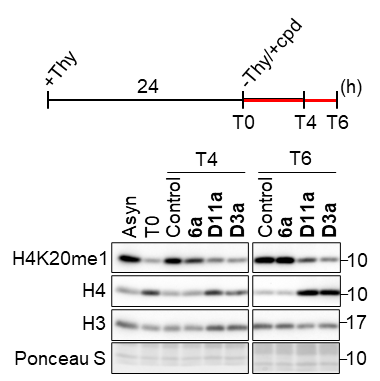
**

Analysis of H4K20 mono-methylation in thymidine-synchronized HL-60 cells treated with 2 μM of indicated compounds. Experimental design (upper) and representative results from one of two biological replicates (lower) are shown. The unequal staining of total histone H4 was potentially due to the interference from the unstripped H4K20me1 antibody remaining on the membrane. Asyn: Asynchronous; Cpd: Compound; Thy: Thymidine.

Figure S6. **D11b** treatment suppresses H4K20 methylation in HCT116 cells.

**
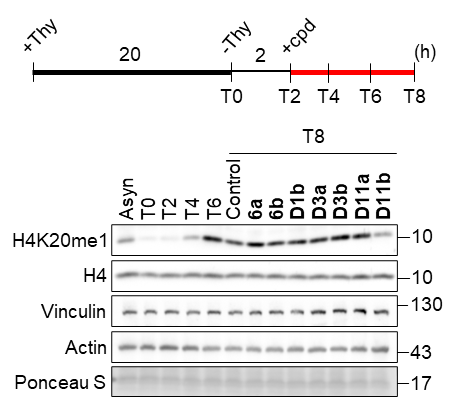
**

Analysis of H4K20 mono-methylation in thymidine-synchronized HCT116 cells treated with 2 μM of indicated compounds. Experimental design (upper) and representative results from one of two biological replicates (lower) are shown. Data were collected from different sets of gel electrophoresis with equal loading of the same samples. Asyn: Asynchronous; Cpd: Compound; Thy: Thymidine.

Figure S7. **D11b** induces a high level of DNA damage in K-562 and HCT116 cells**.**


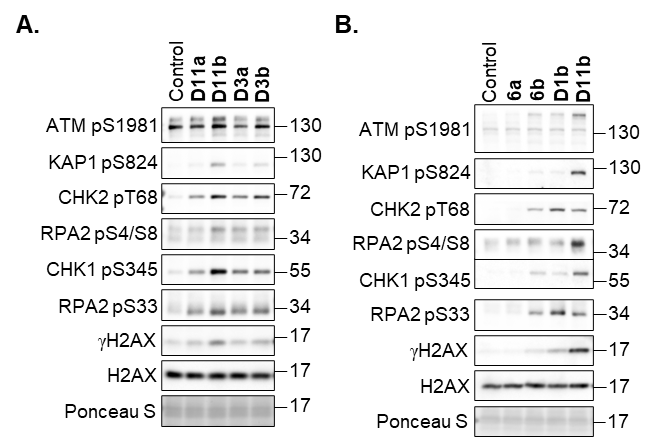


Analysis of DNA damage signaling in K-562 (A) and HCT116 (B) cells treated with 1 μM of indicated compounds for 4 h (A) or 2 μM for 8 h (B) . Representative results from one of two biological replicates are shown.

Figure S8. 1H-NMR, 13C-NMR, HRMS spectra,3 and HPLC profile of Final Compounds


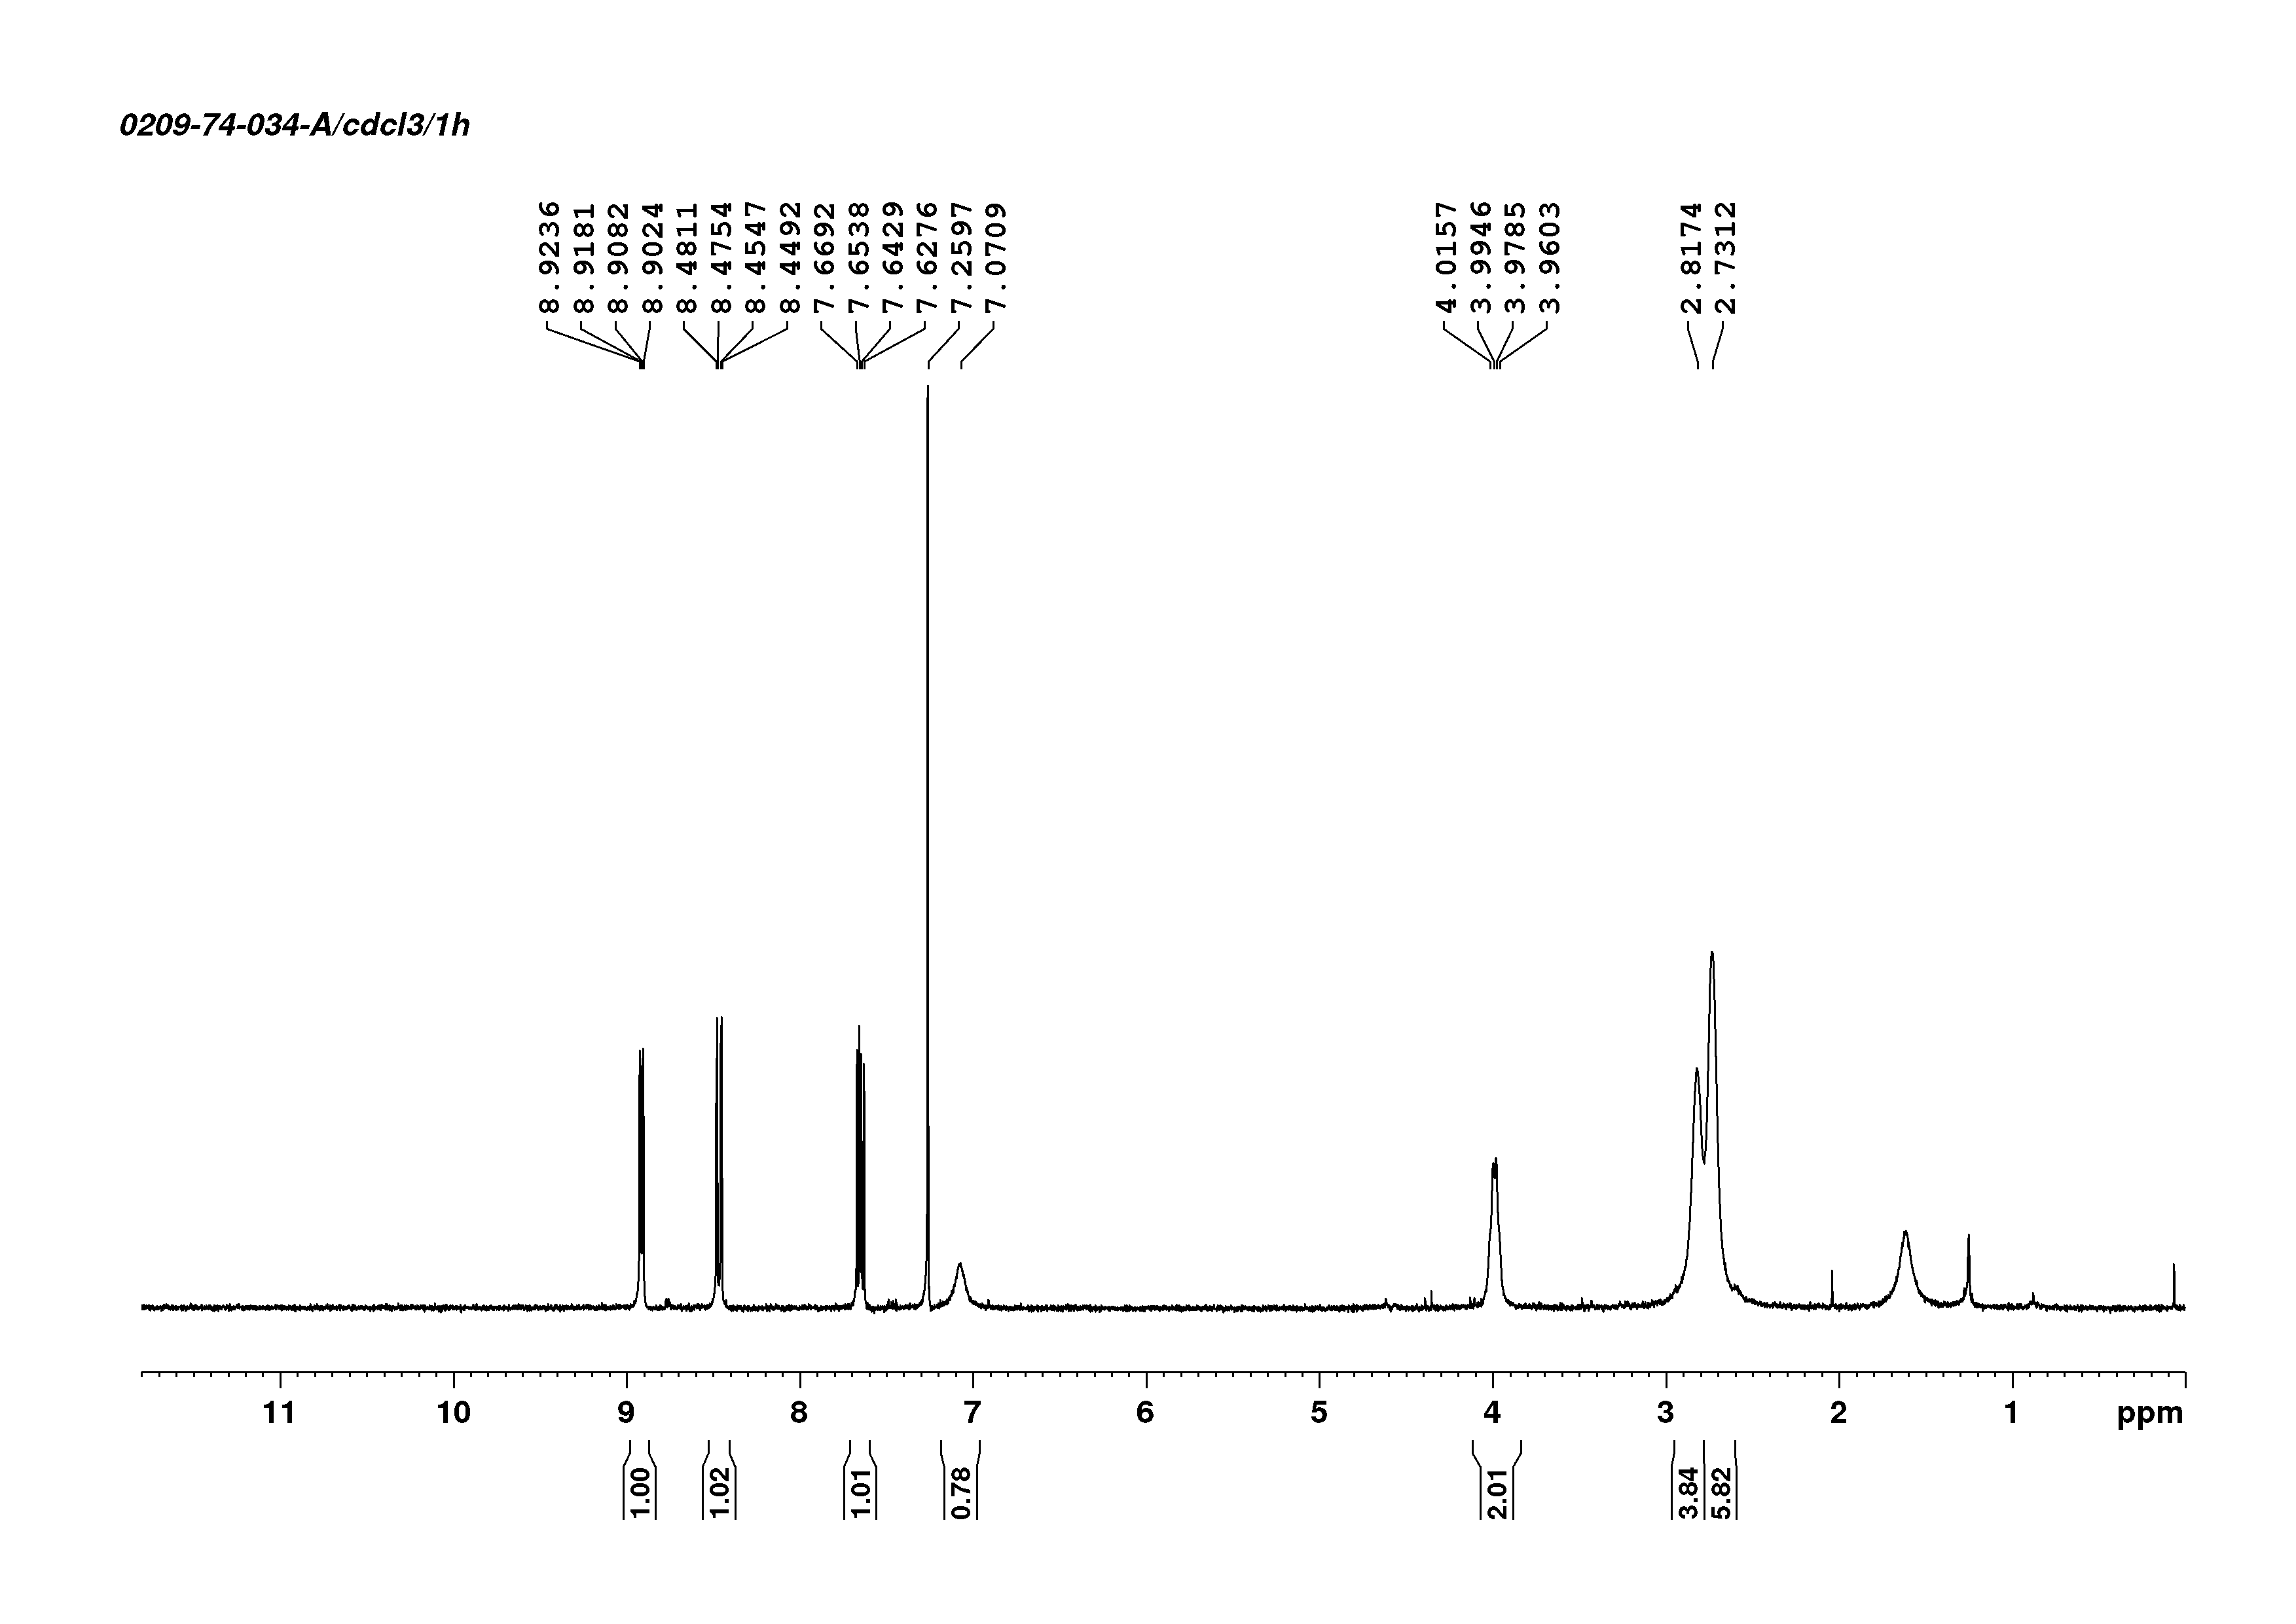


1H-NMR spectrum of compound **D1a**


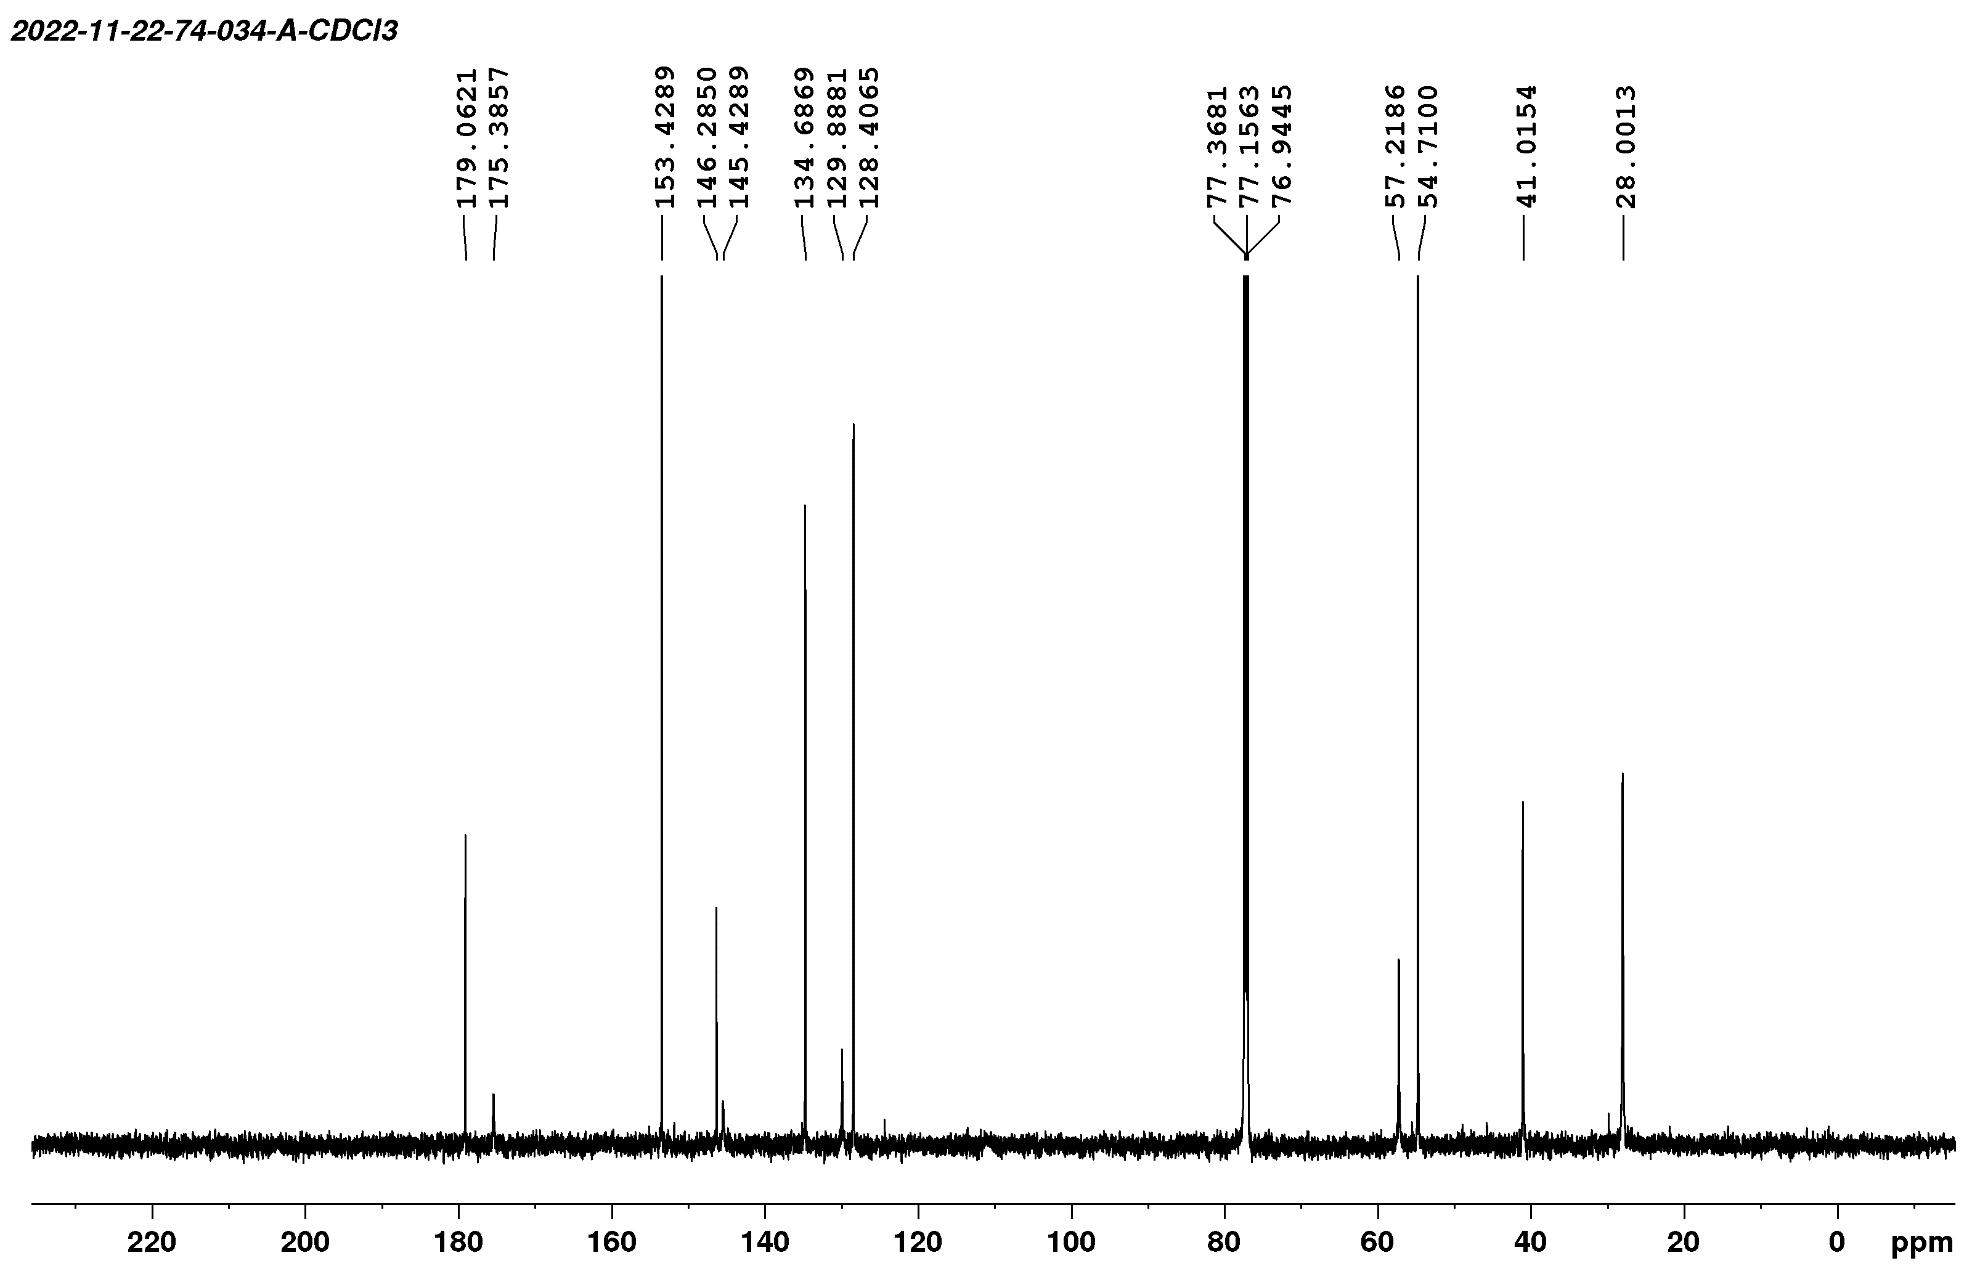


13C-NMR spectrum of compound **D1a**

**
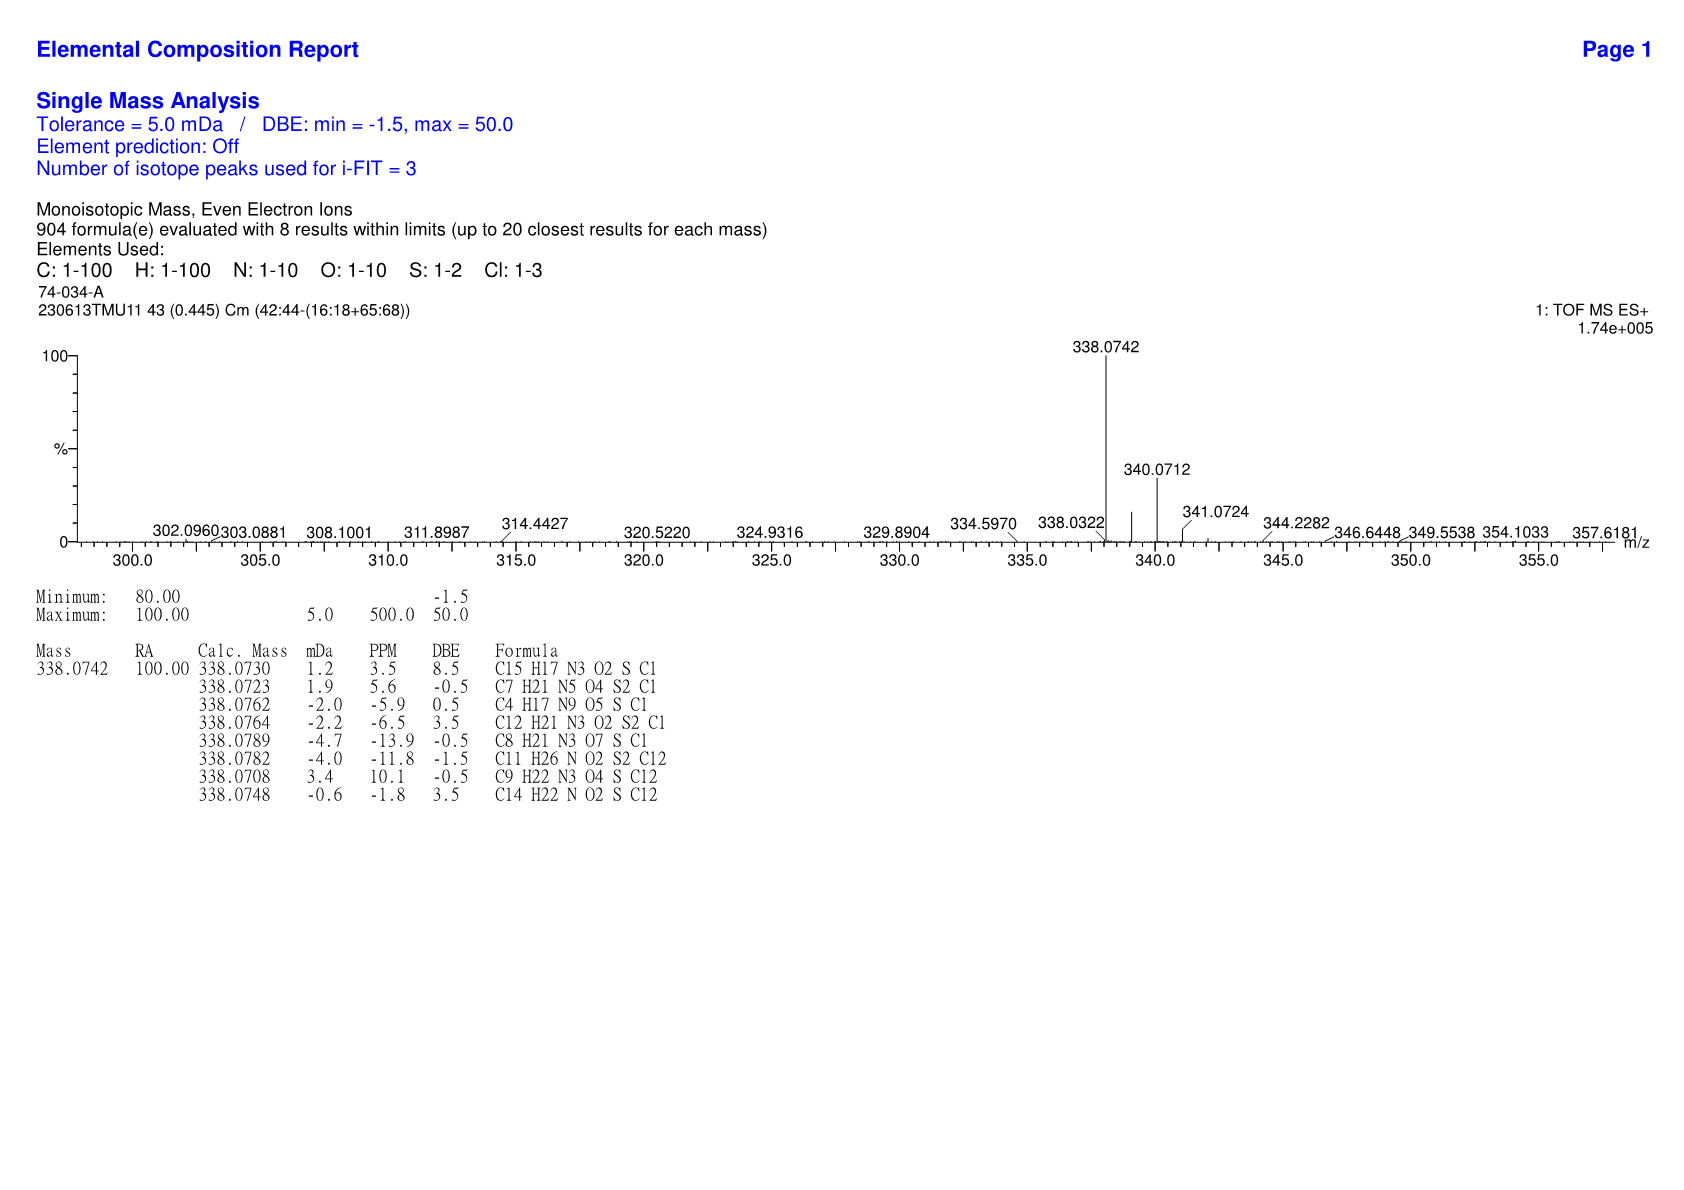
**

HRMS spectrum of compound **D1a**


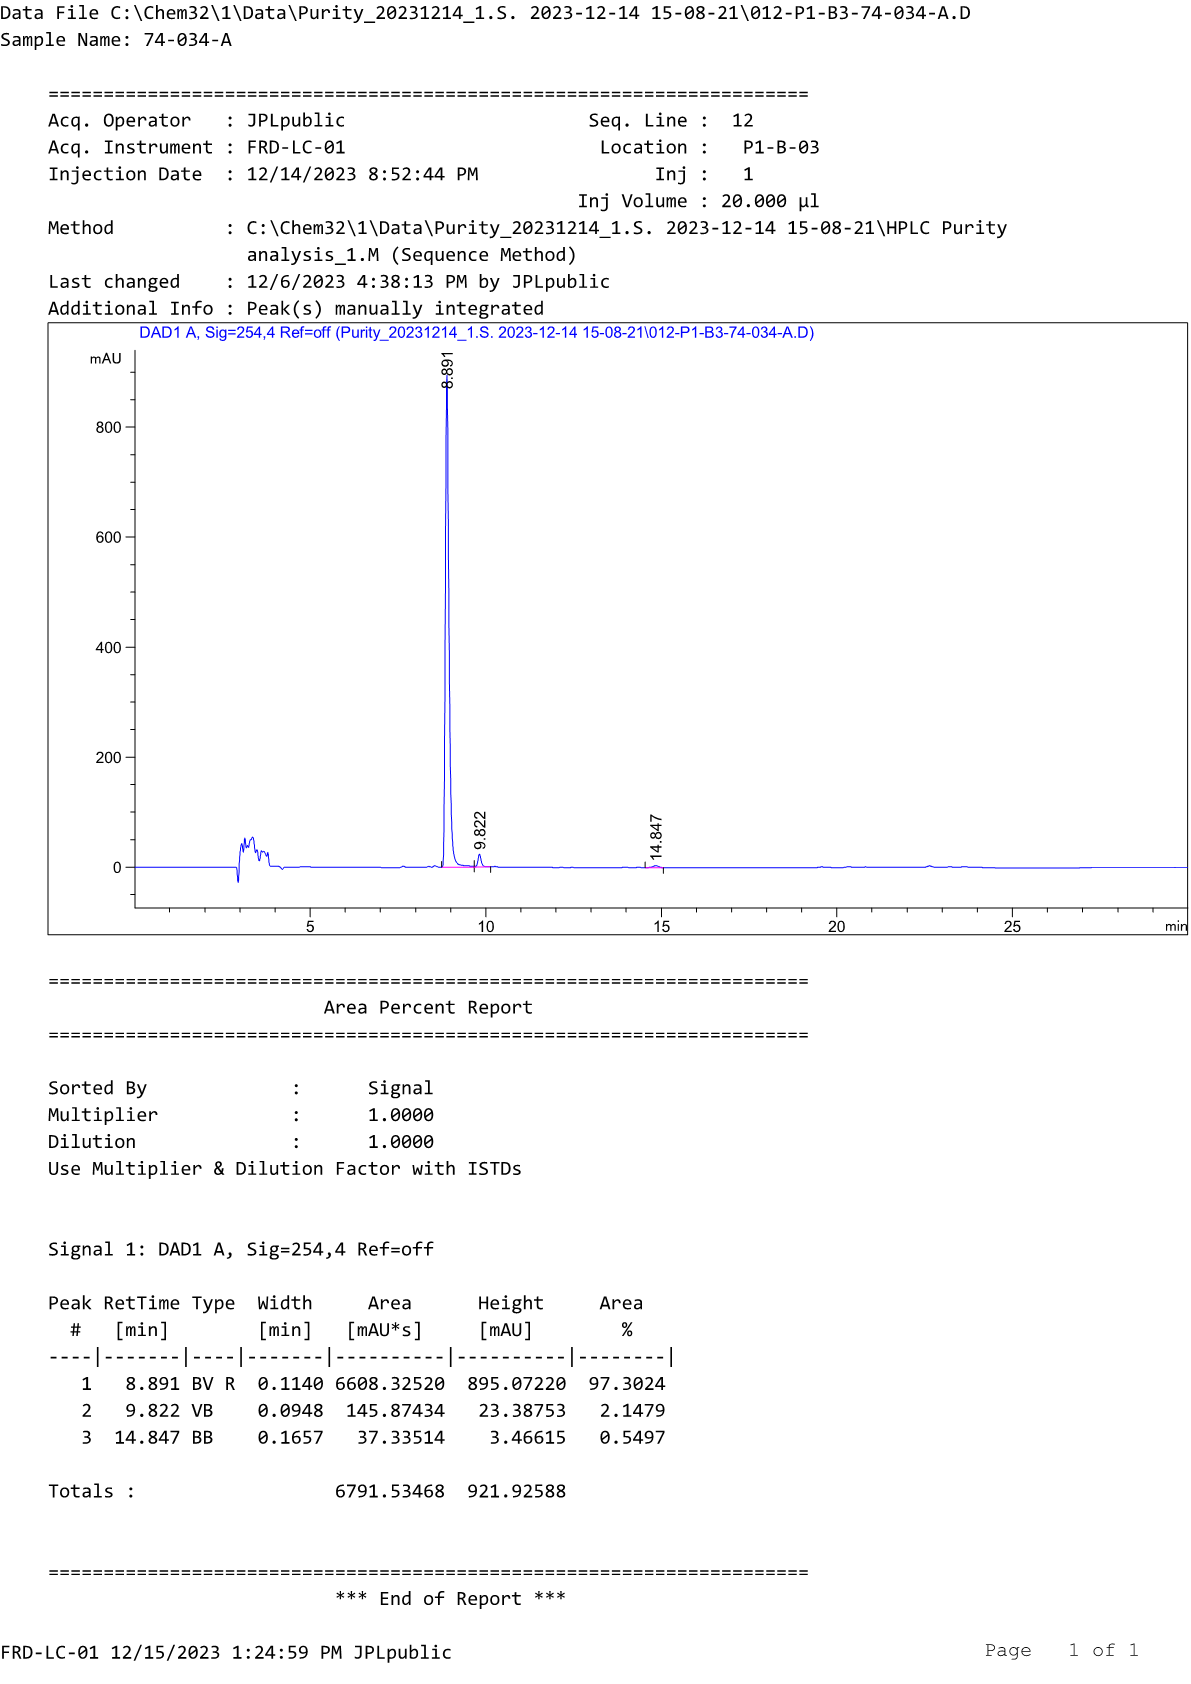


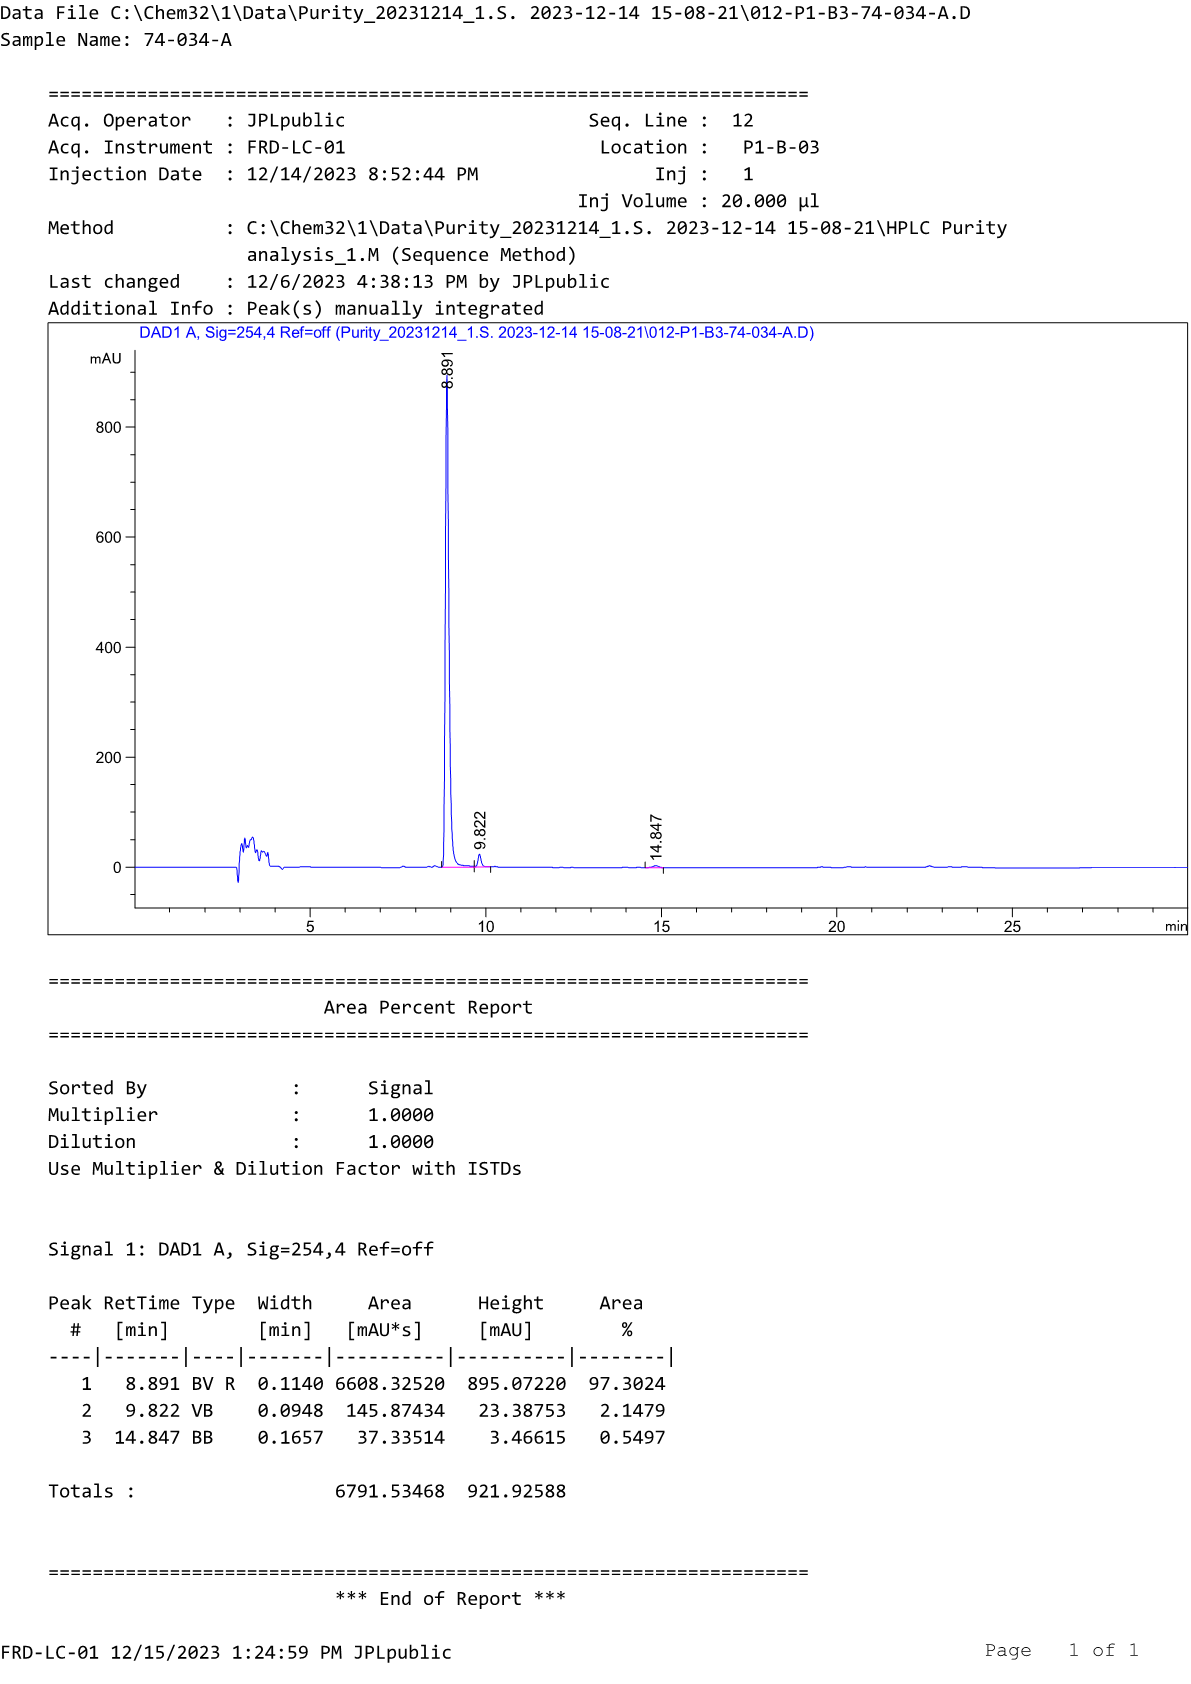


HPLC profile of compound **D1a**


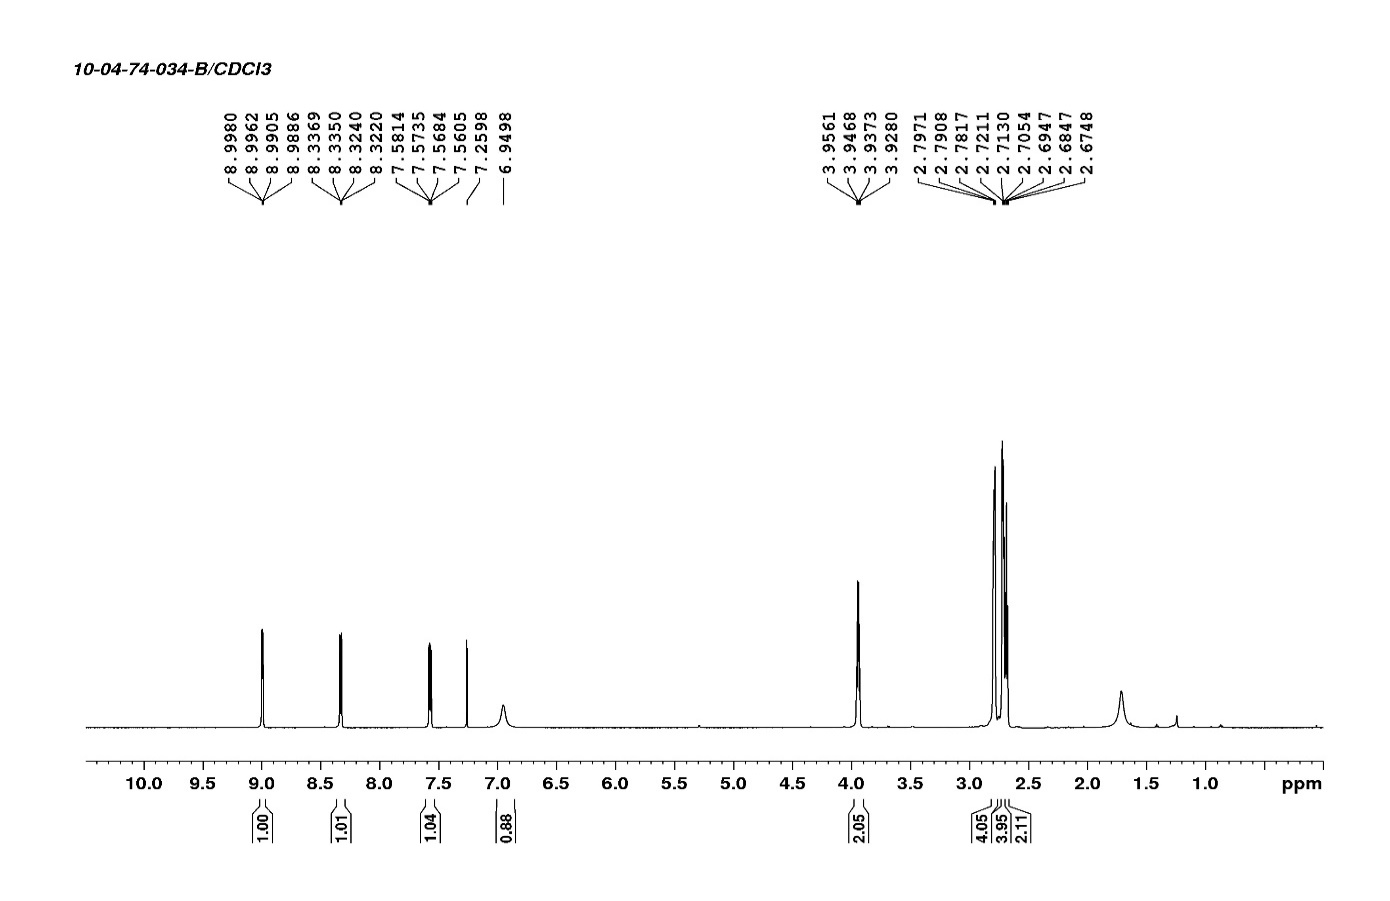


1H-NMR spectrum of compound **D1b**


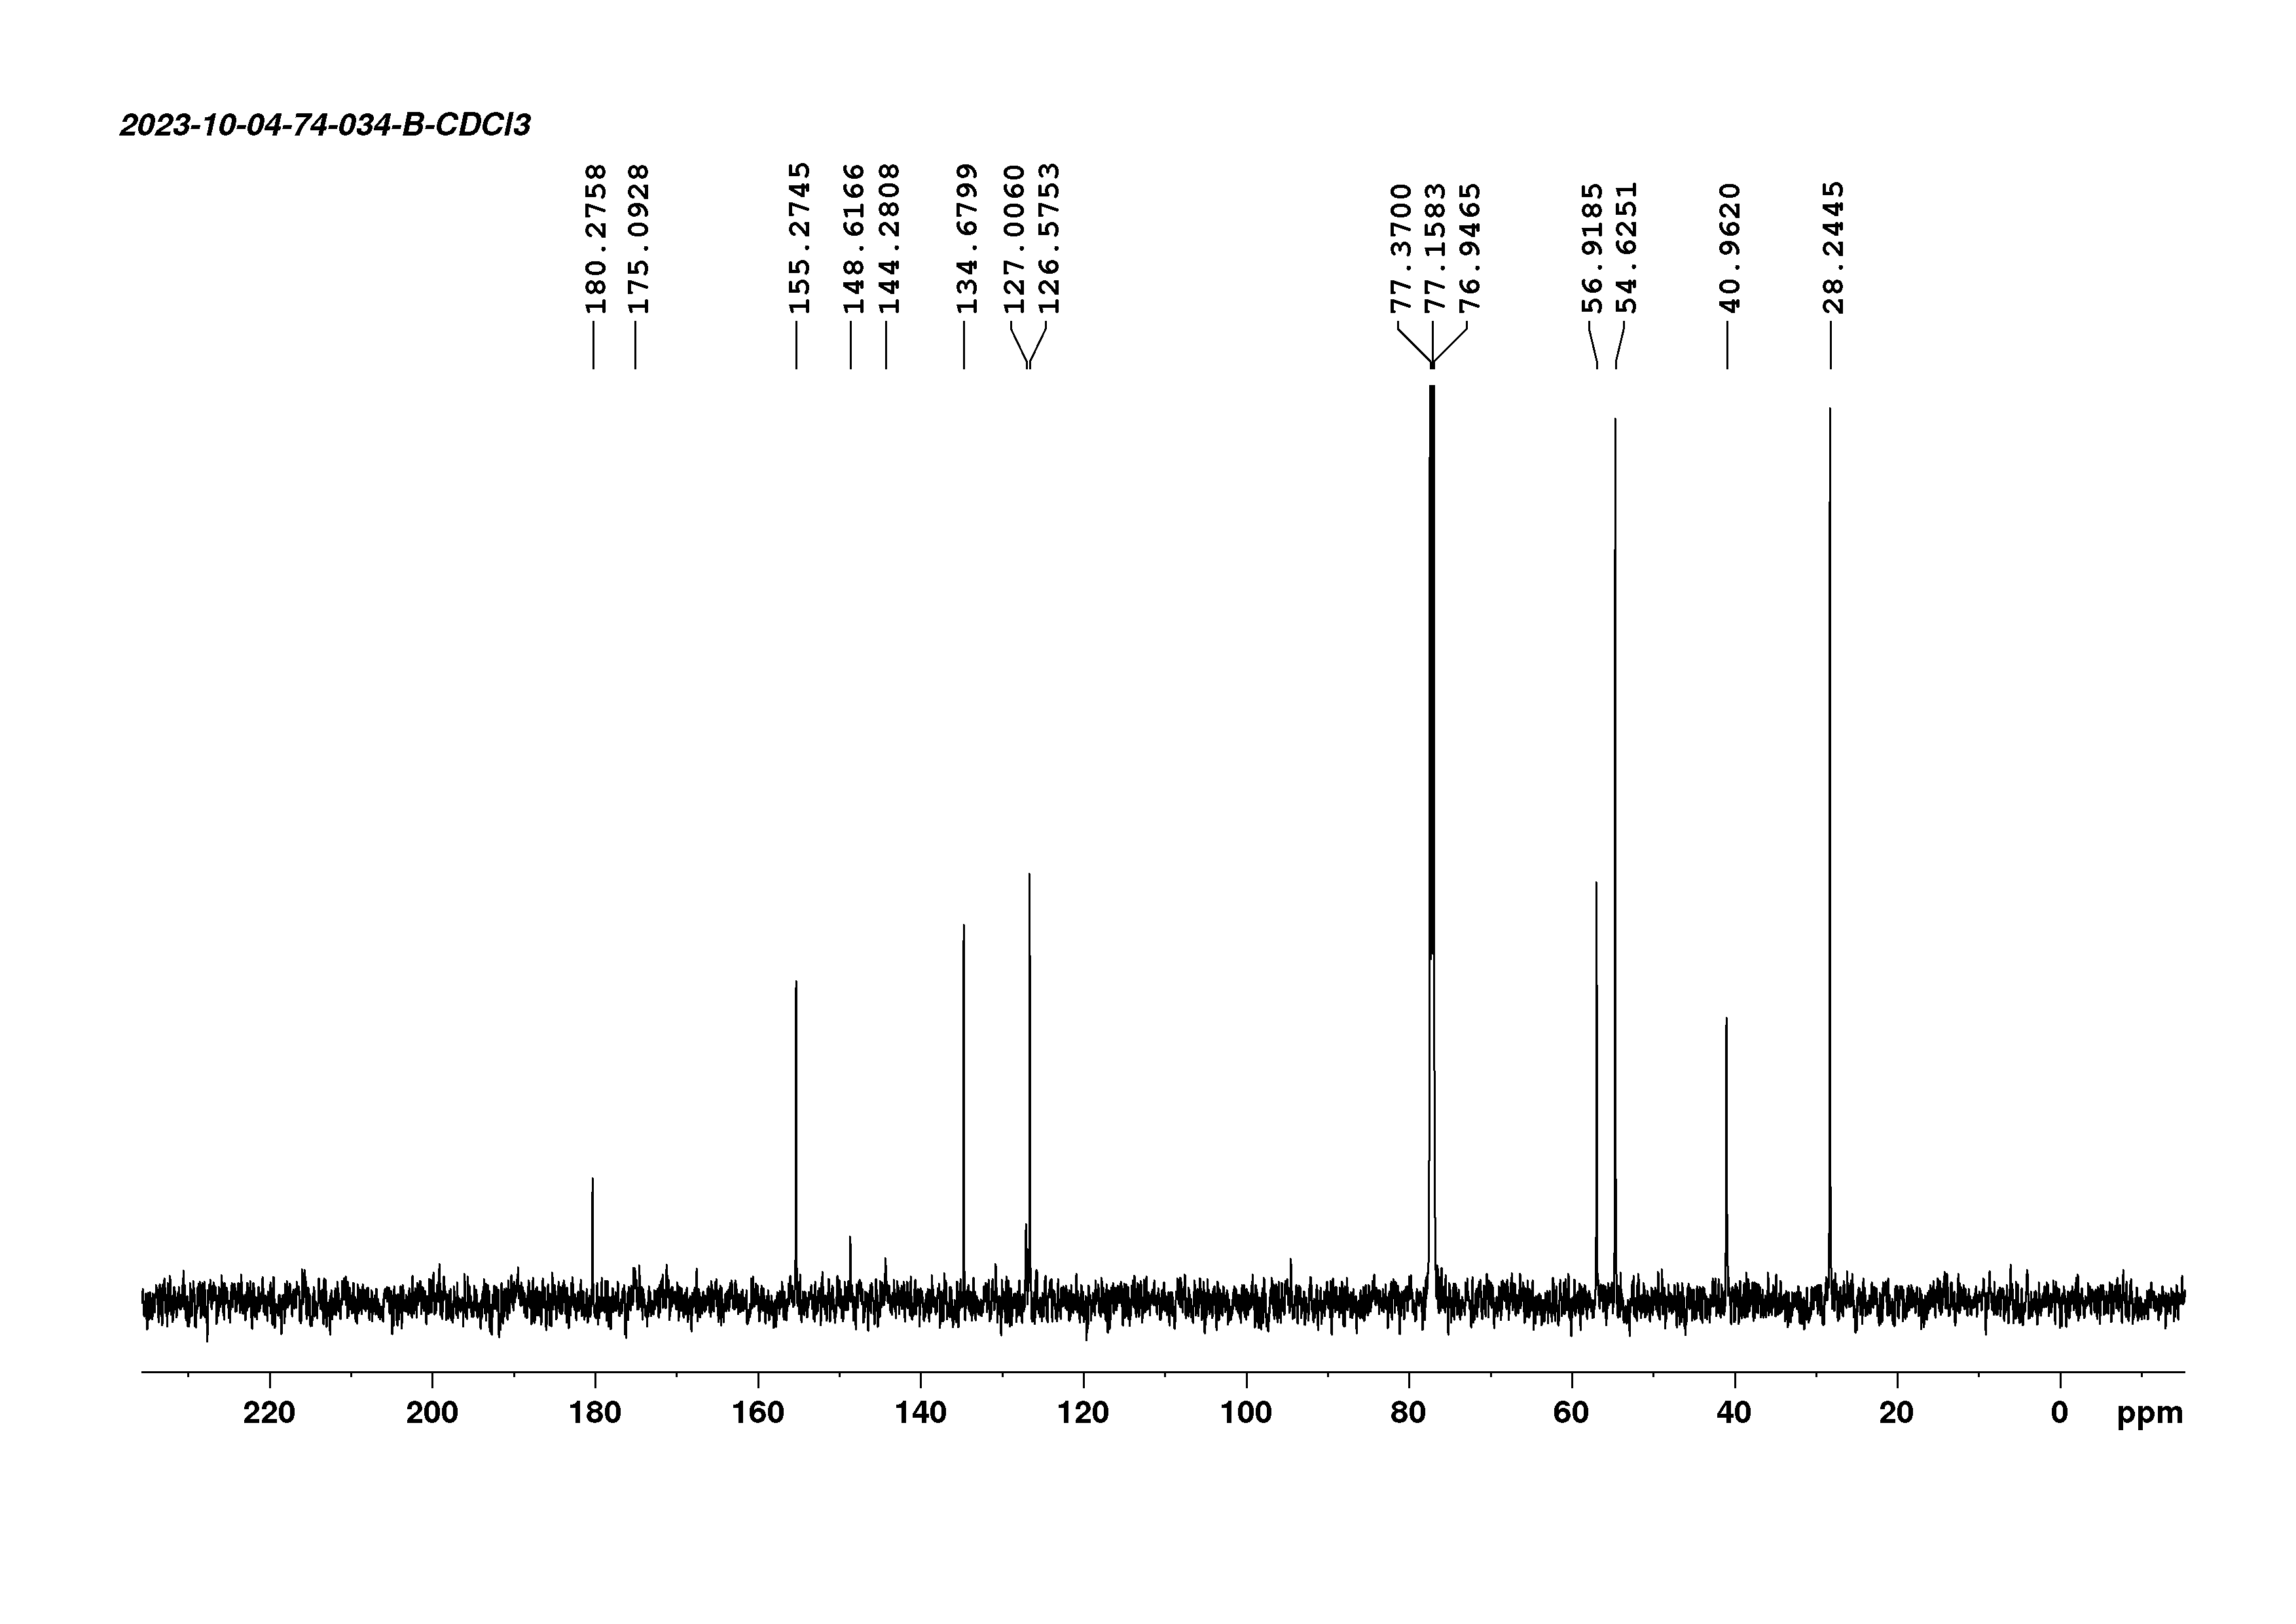


13C-NMR spectrum of compound **D1b**

**
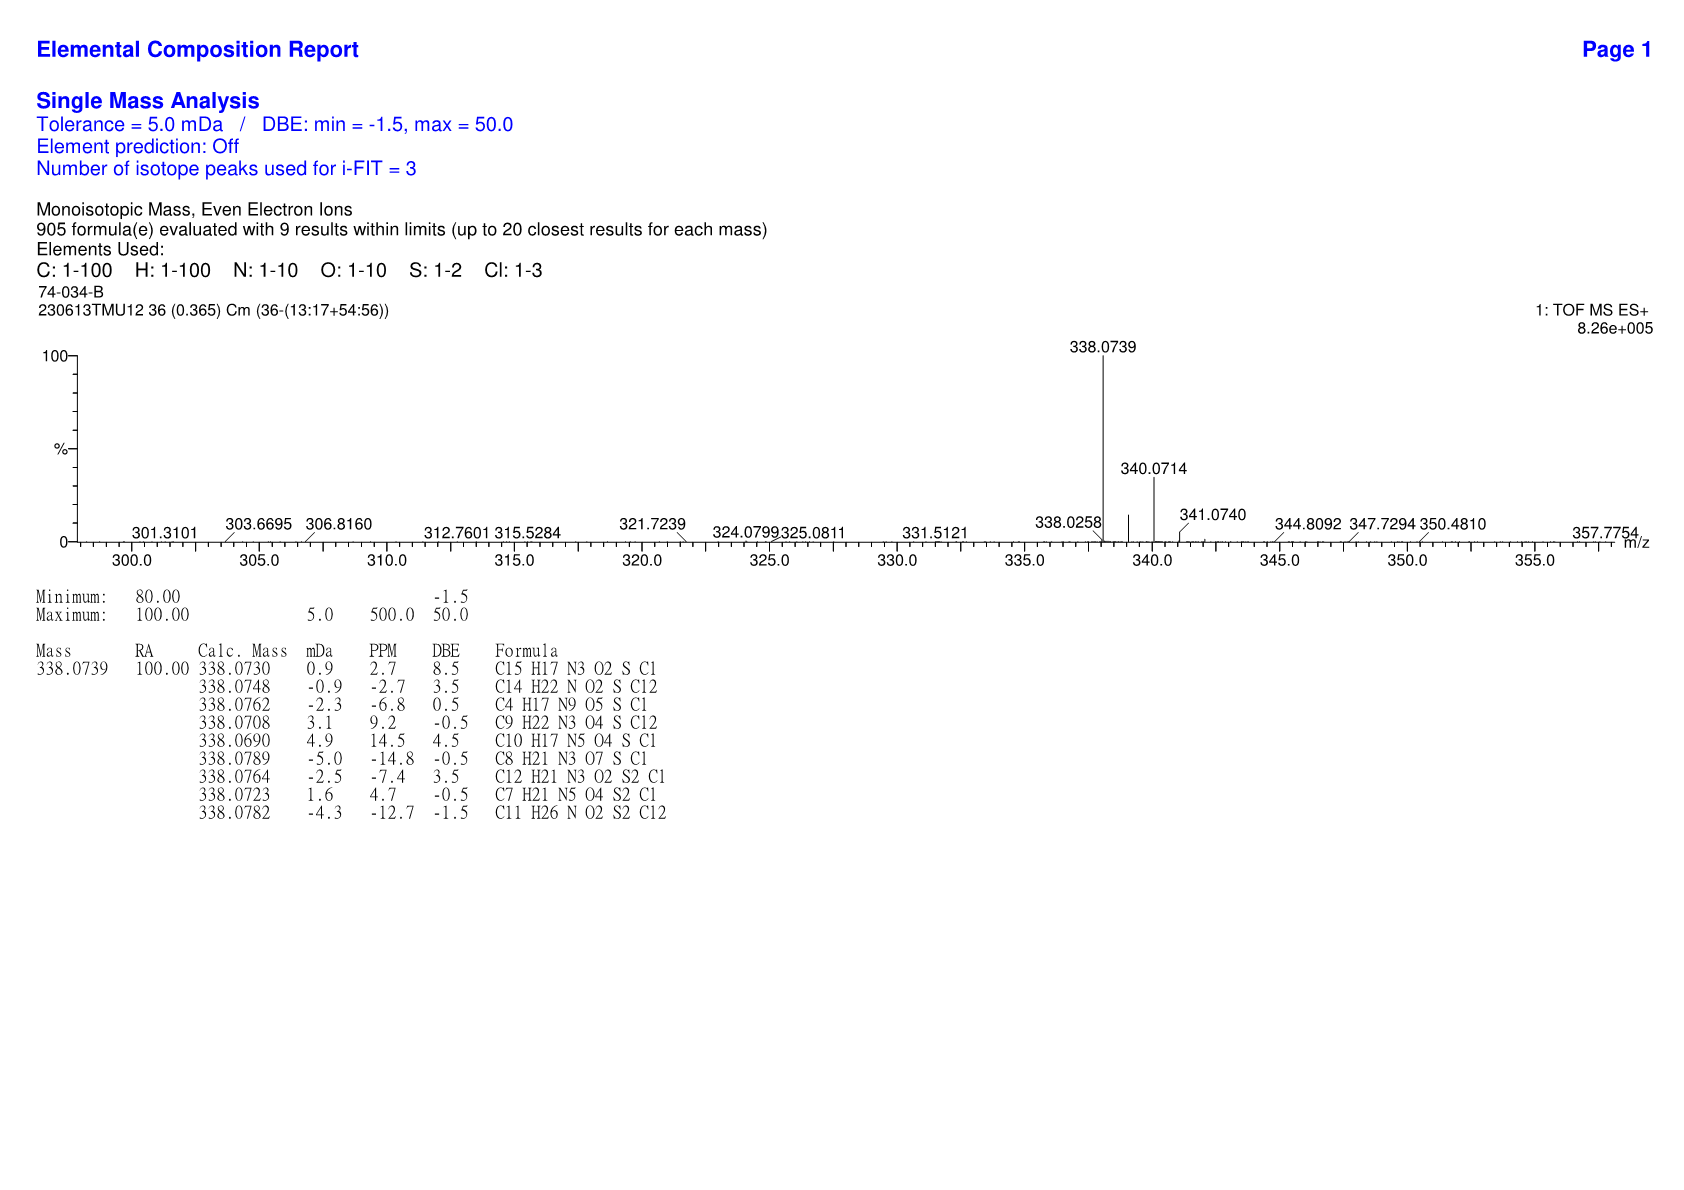
**

HRMS spectrum of compound **D1b**


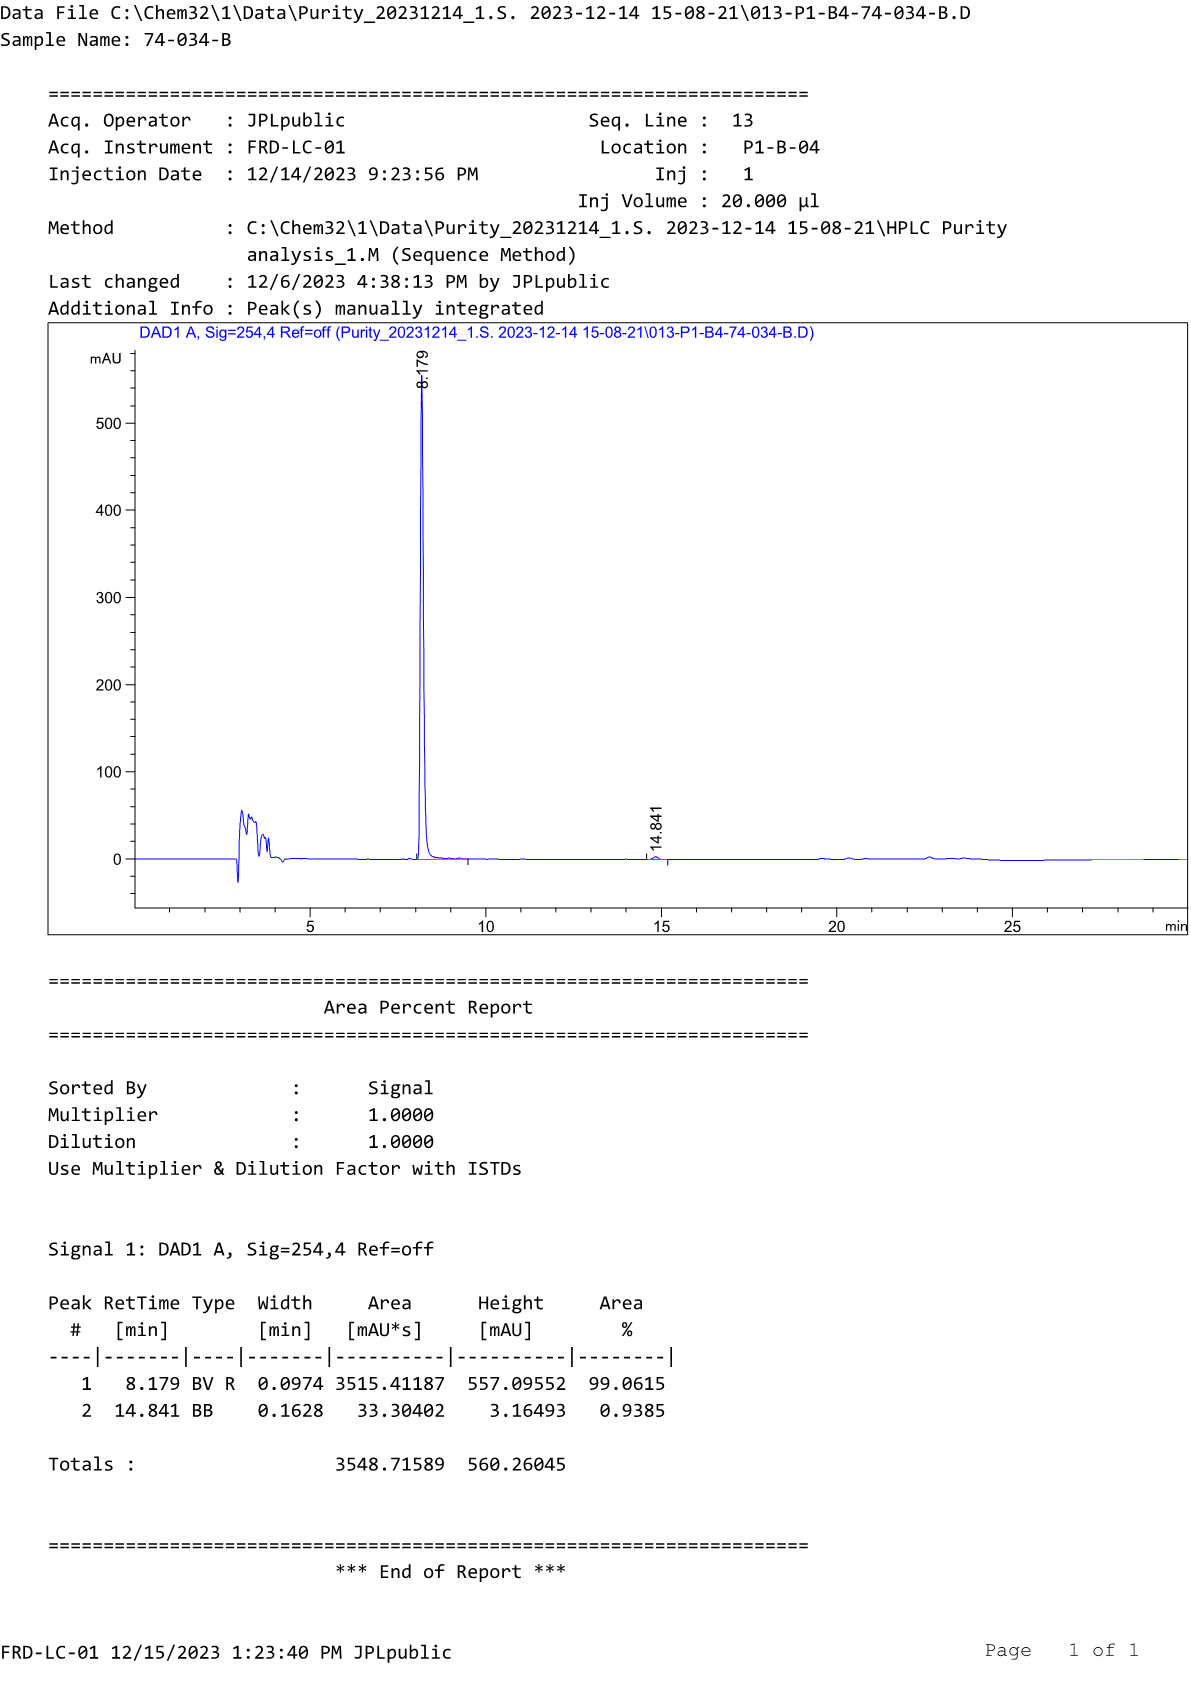


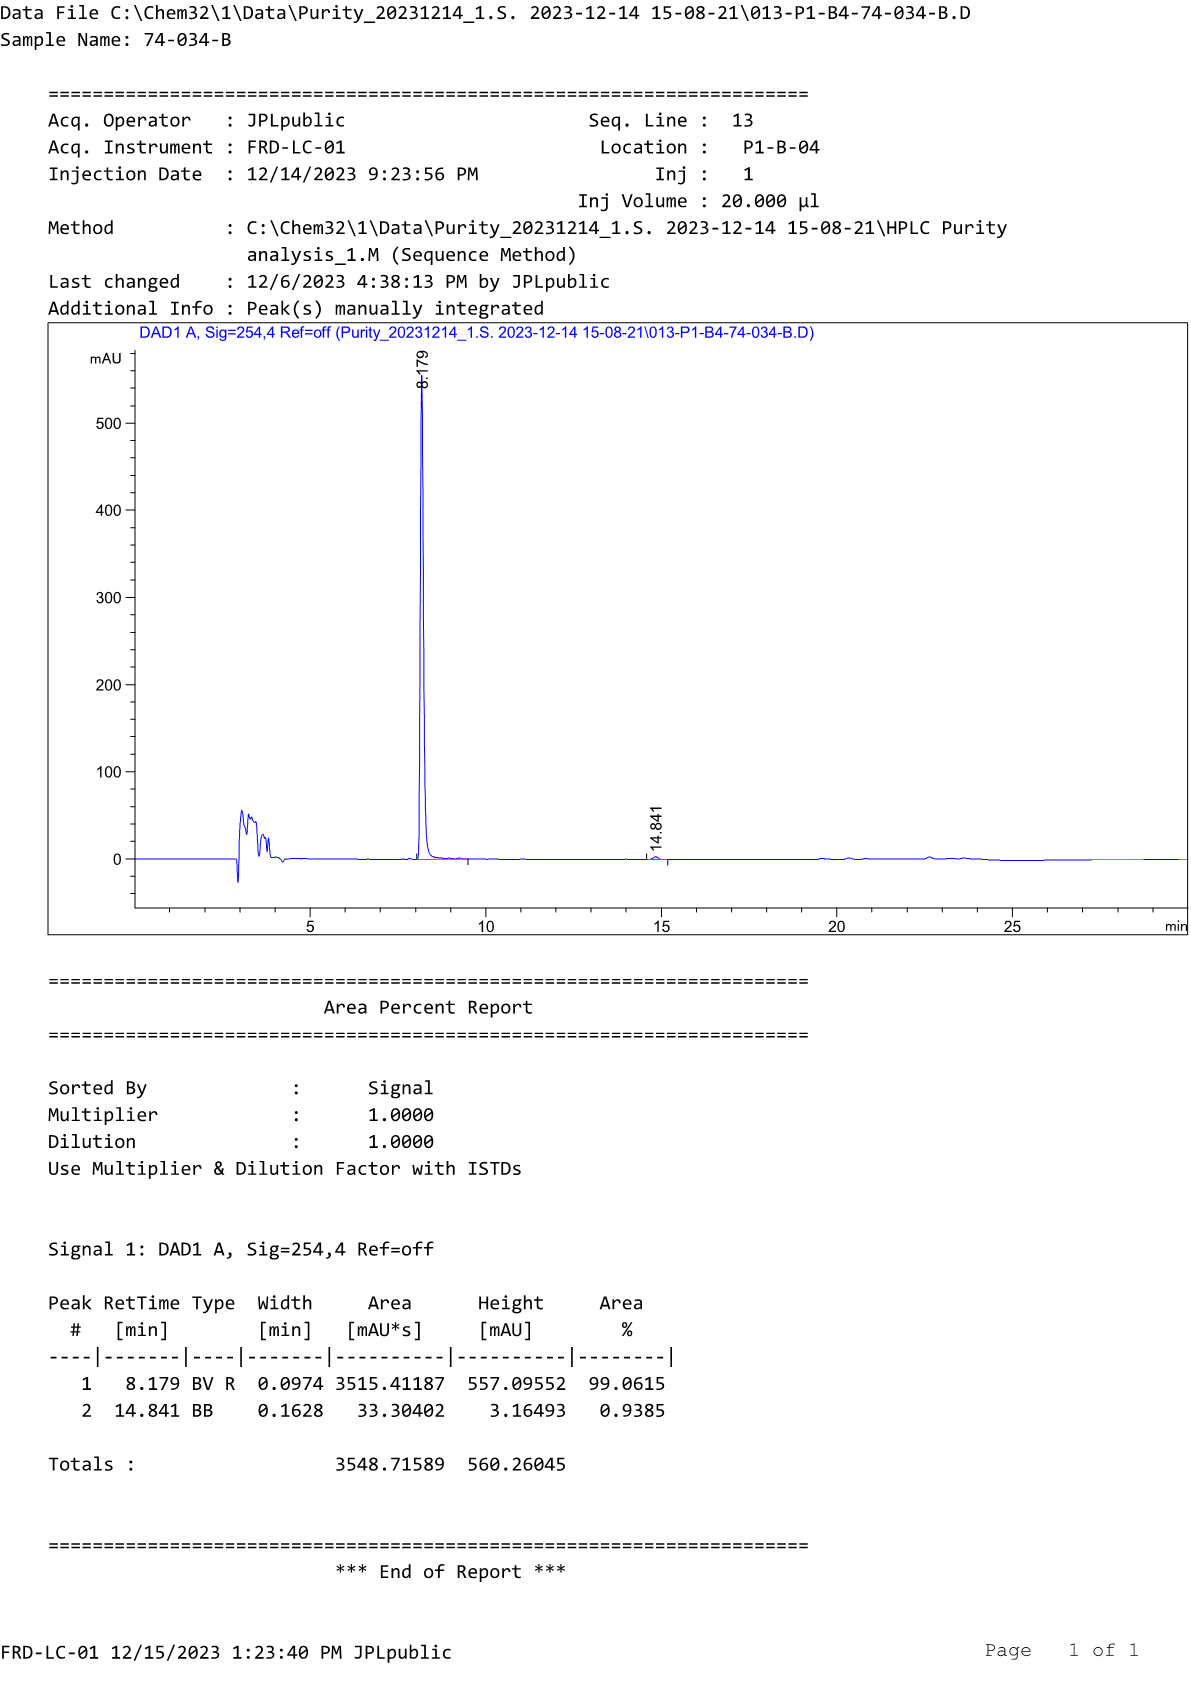


HPLC profile of compound **D1b**


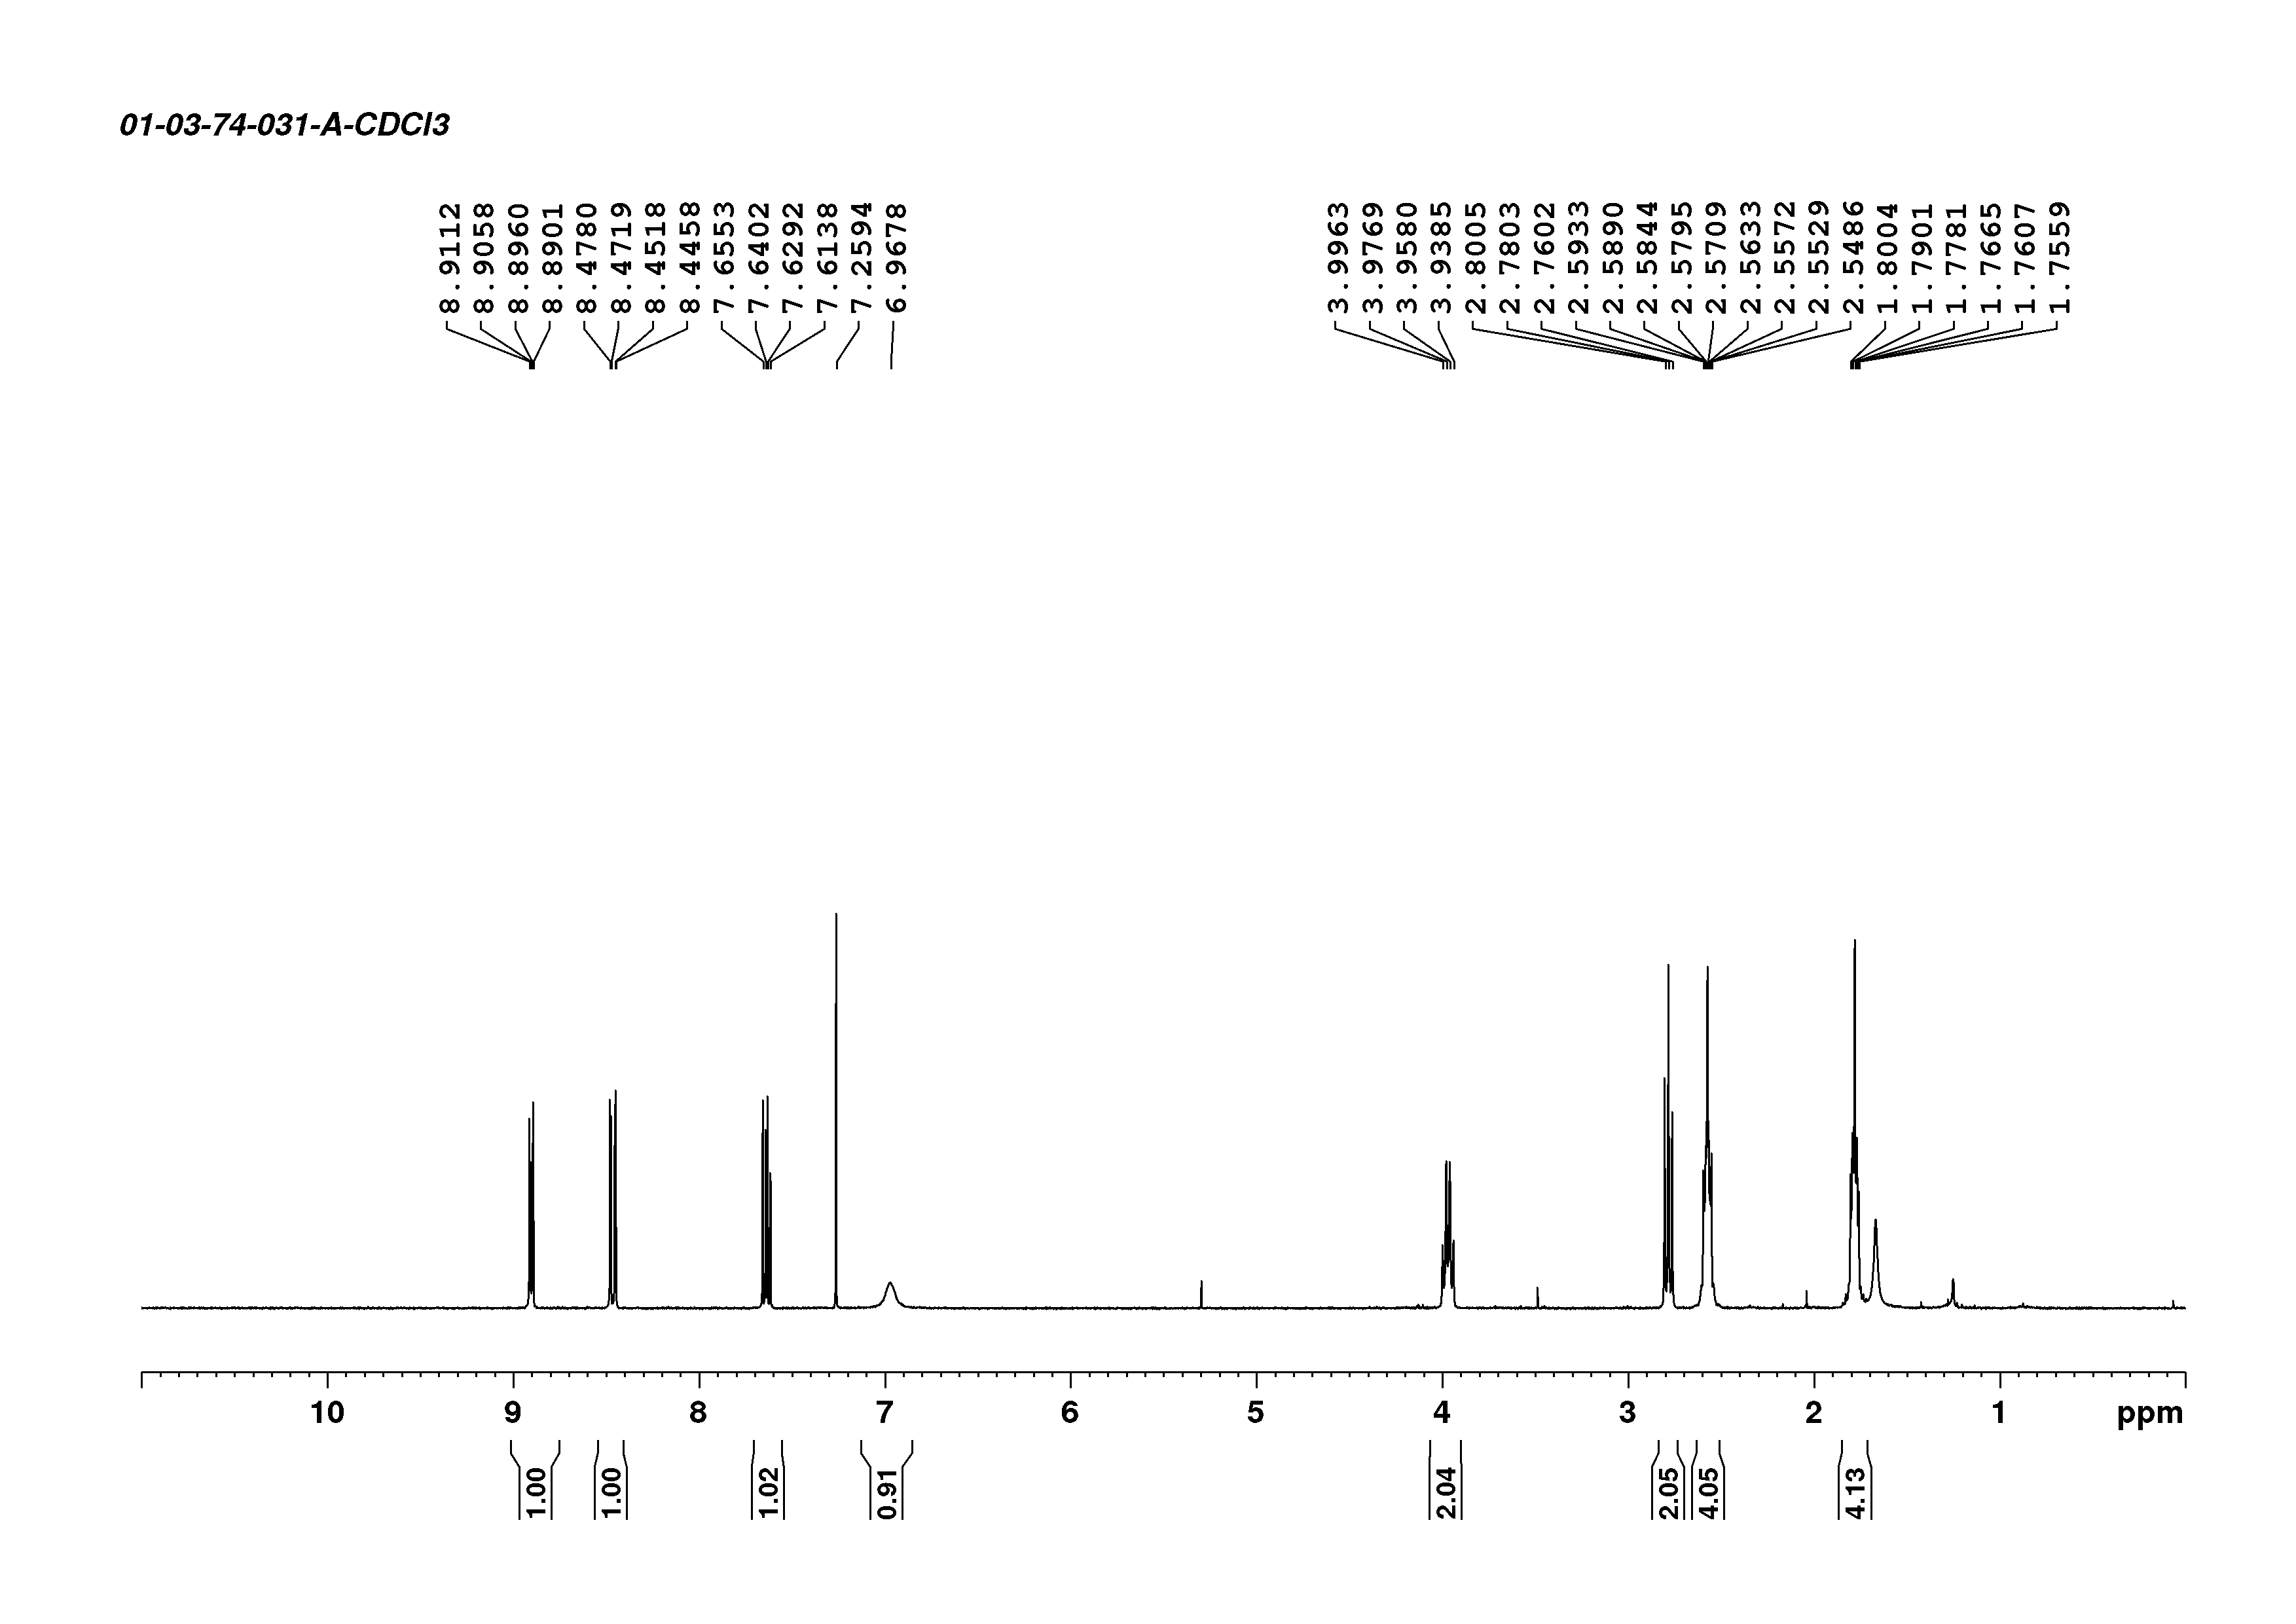


1H-NMR spectrum of compound **D2a**


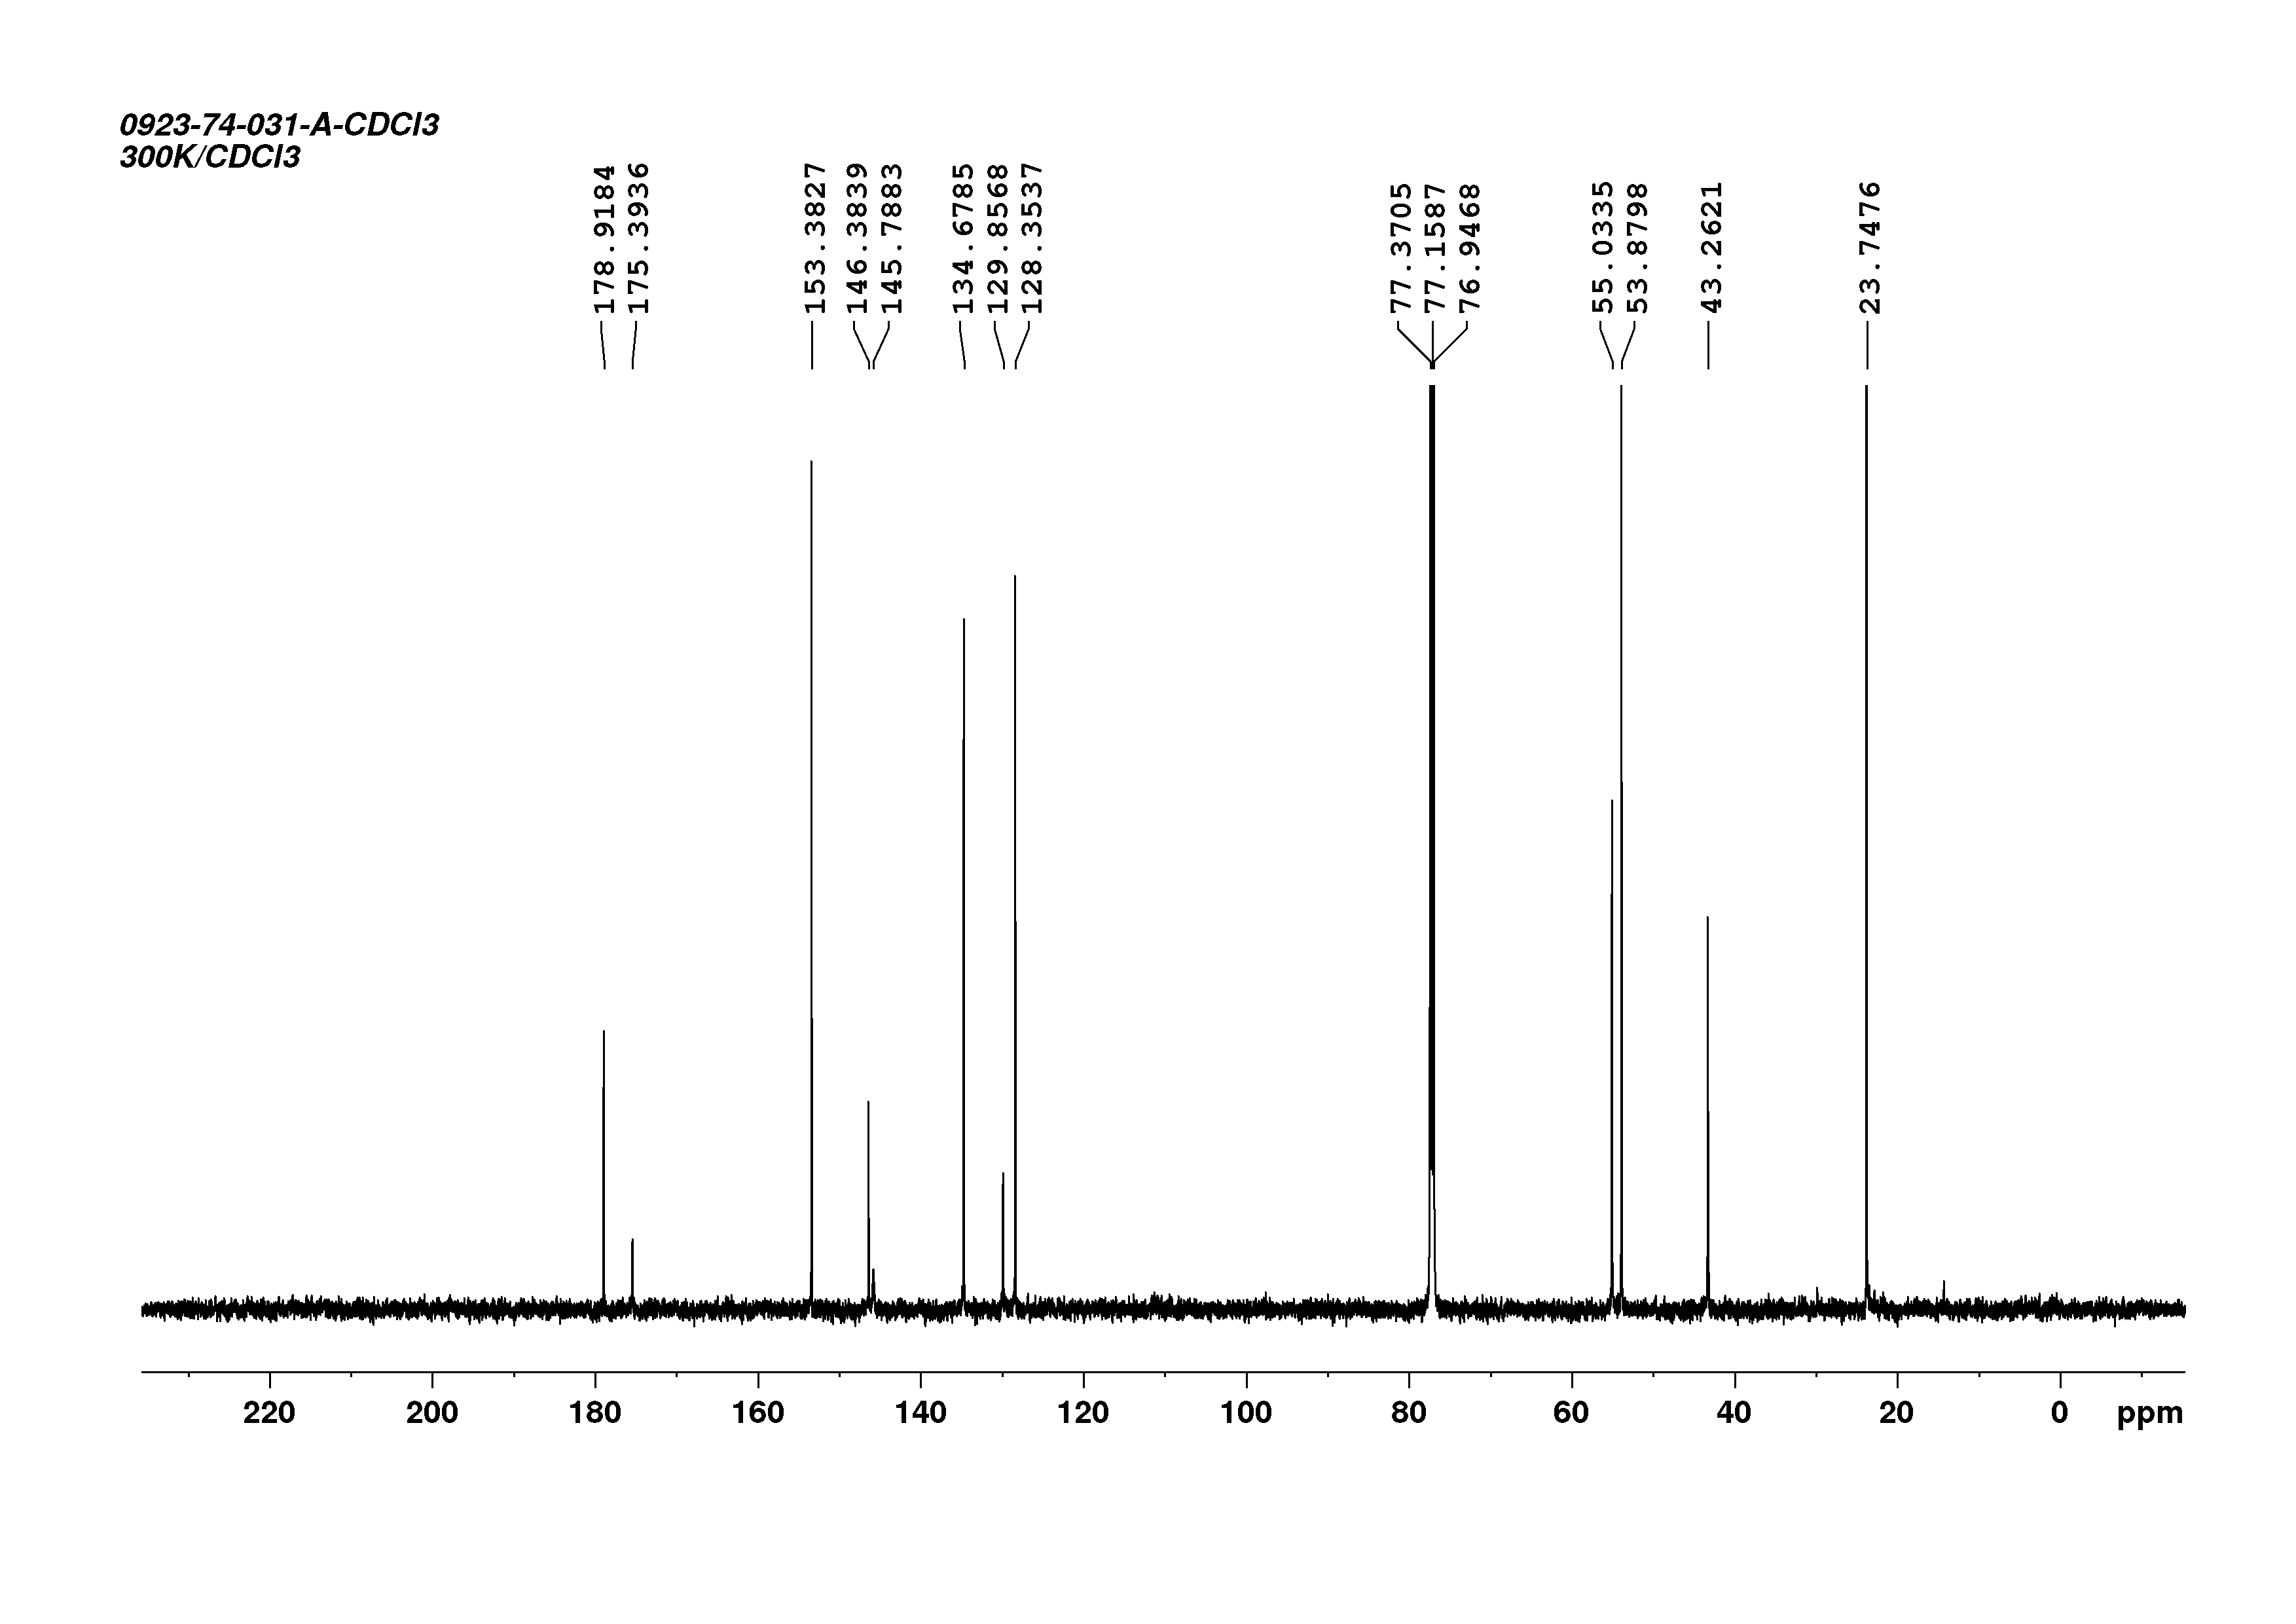


13C-NMR spectrum of compound **D2a**

**
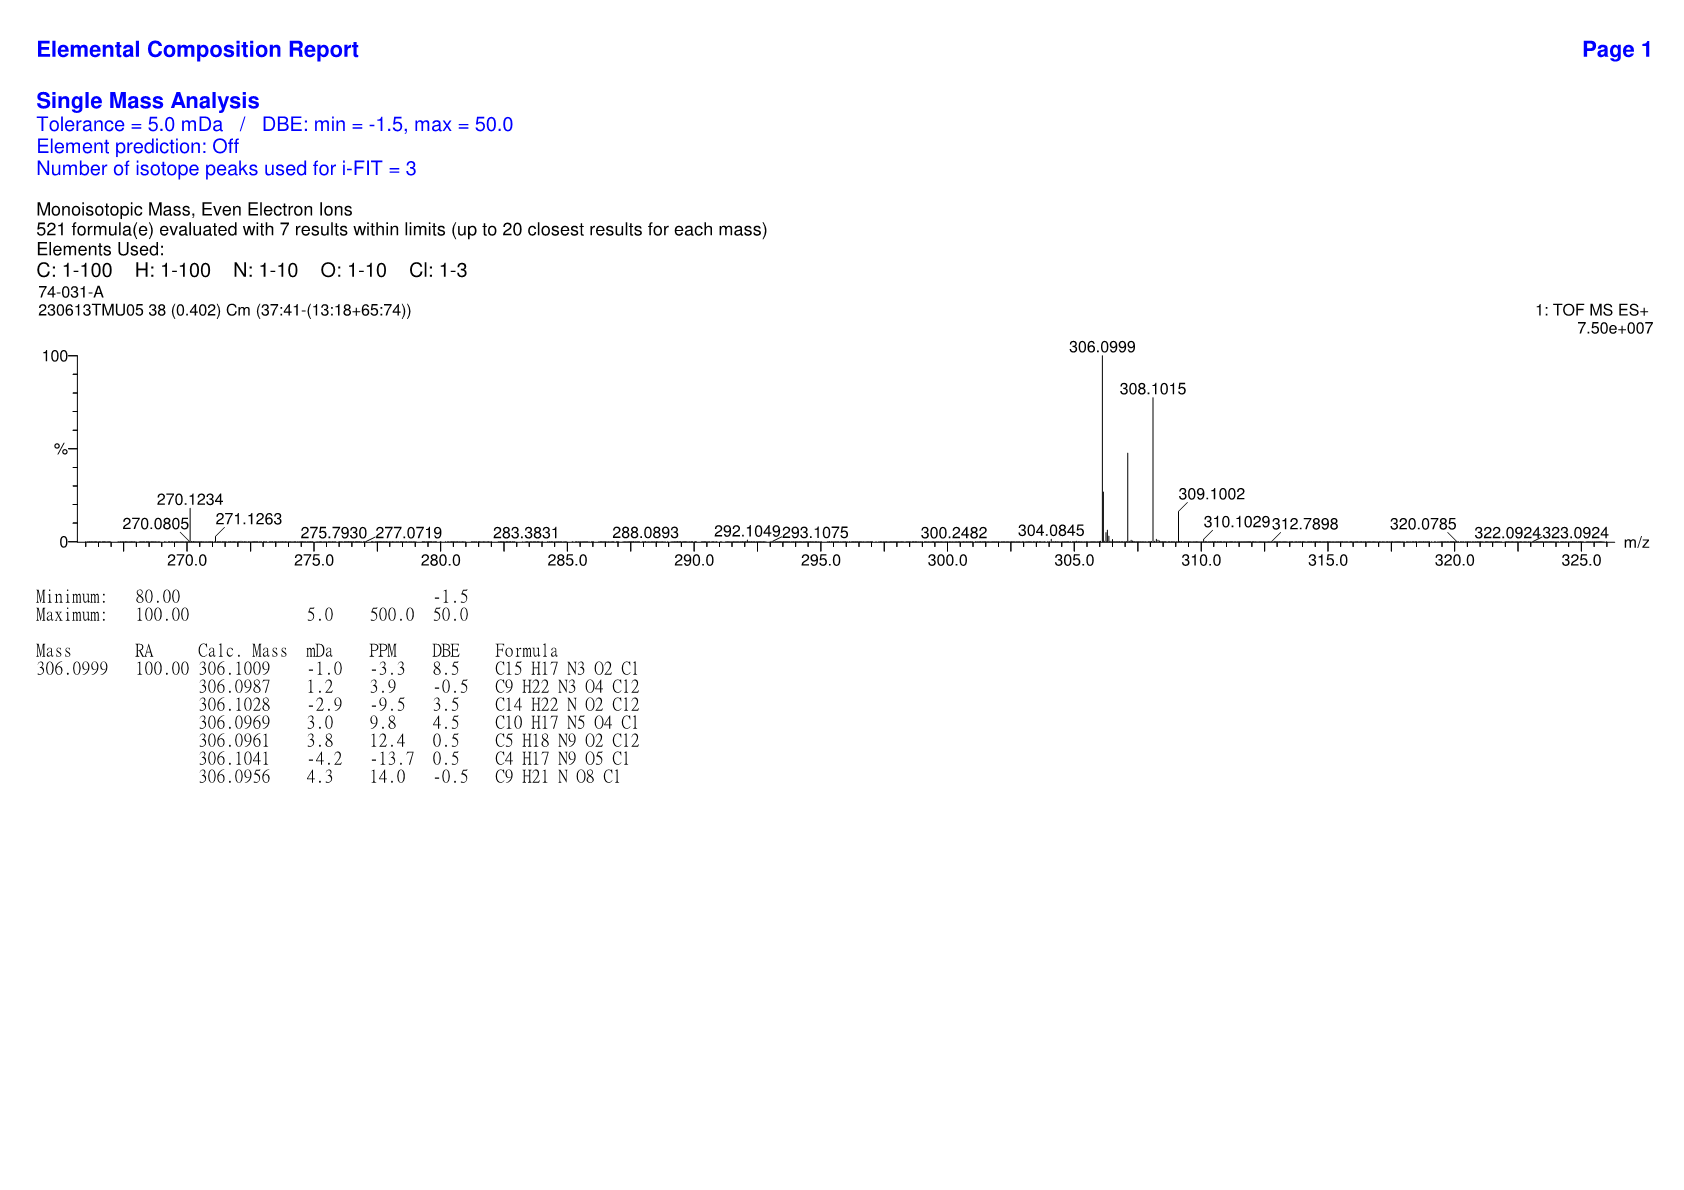
**

HRMS spectrum of compound **D2a**


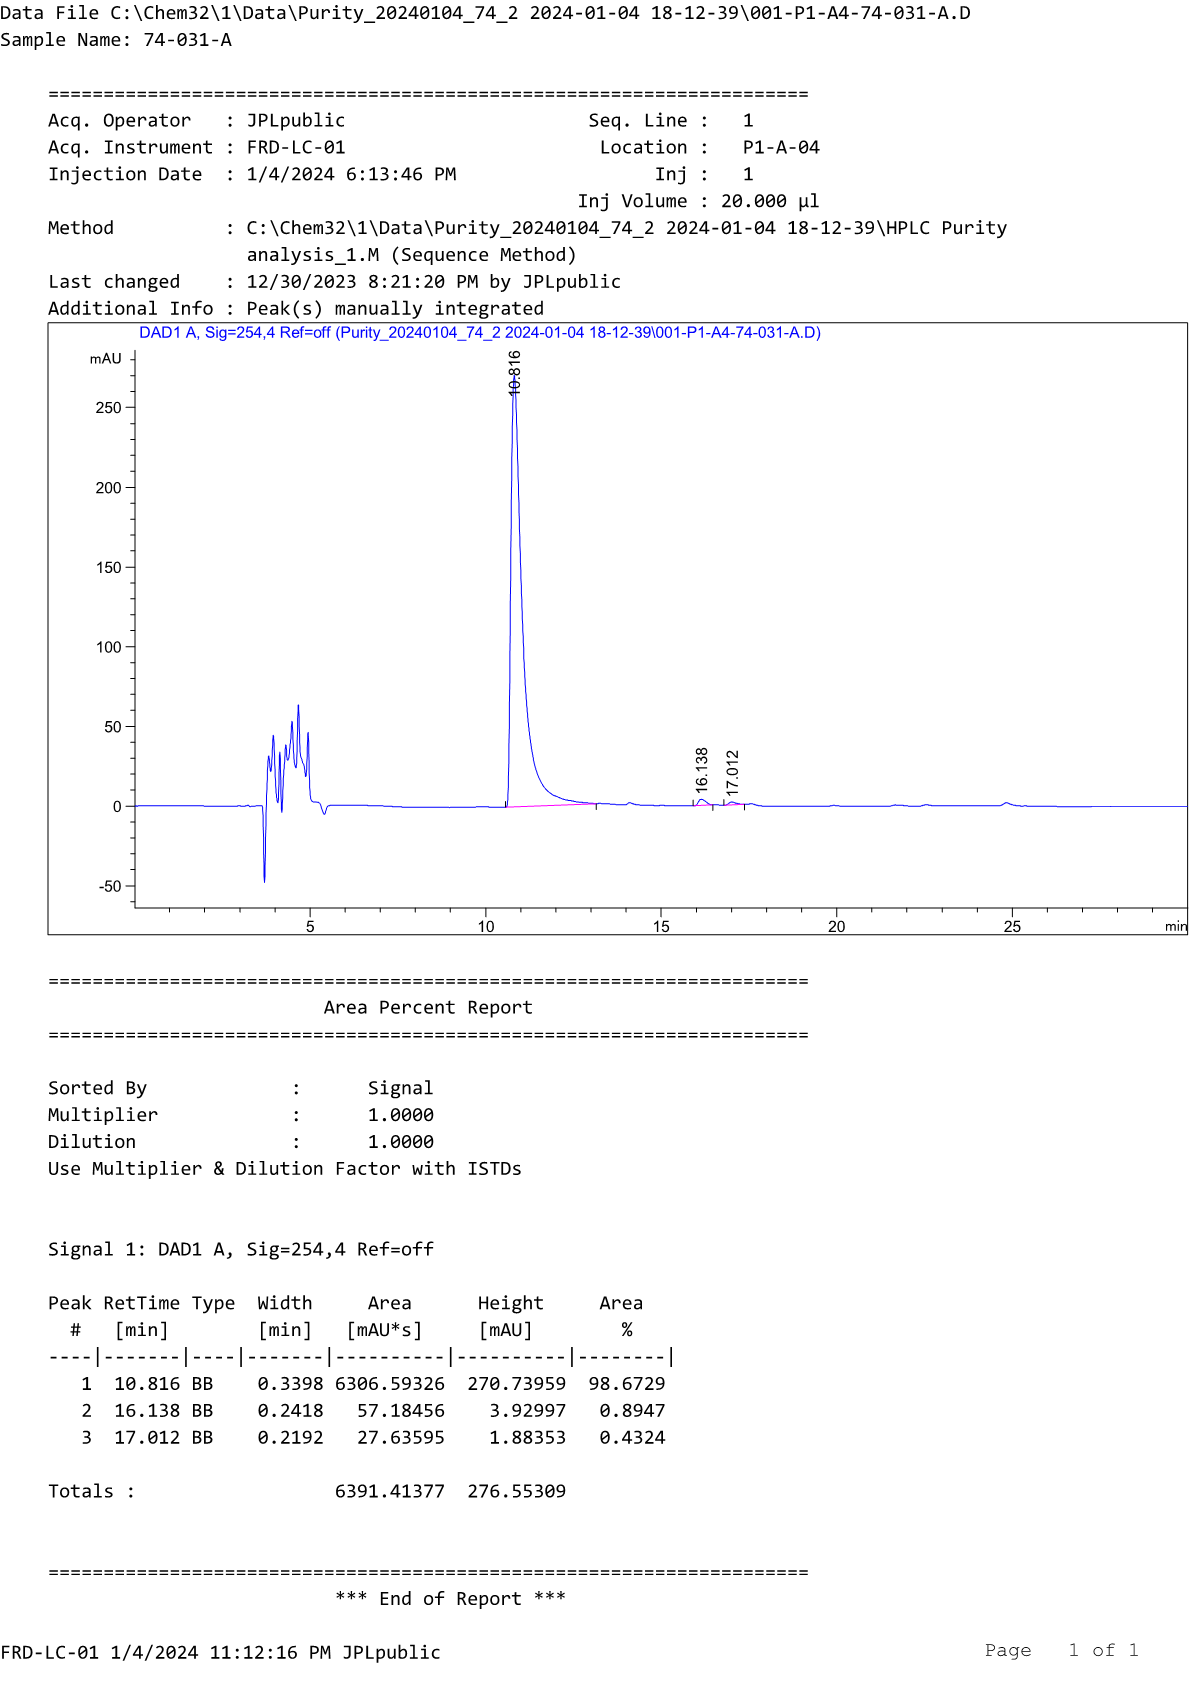


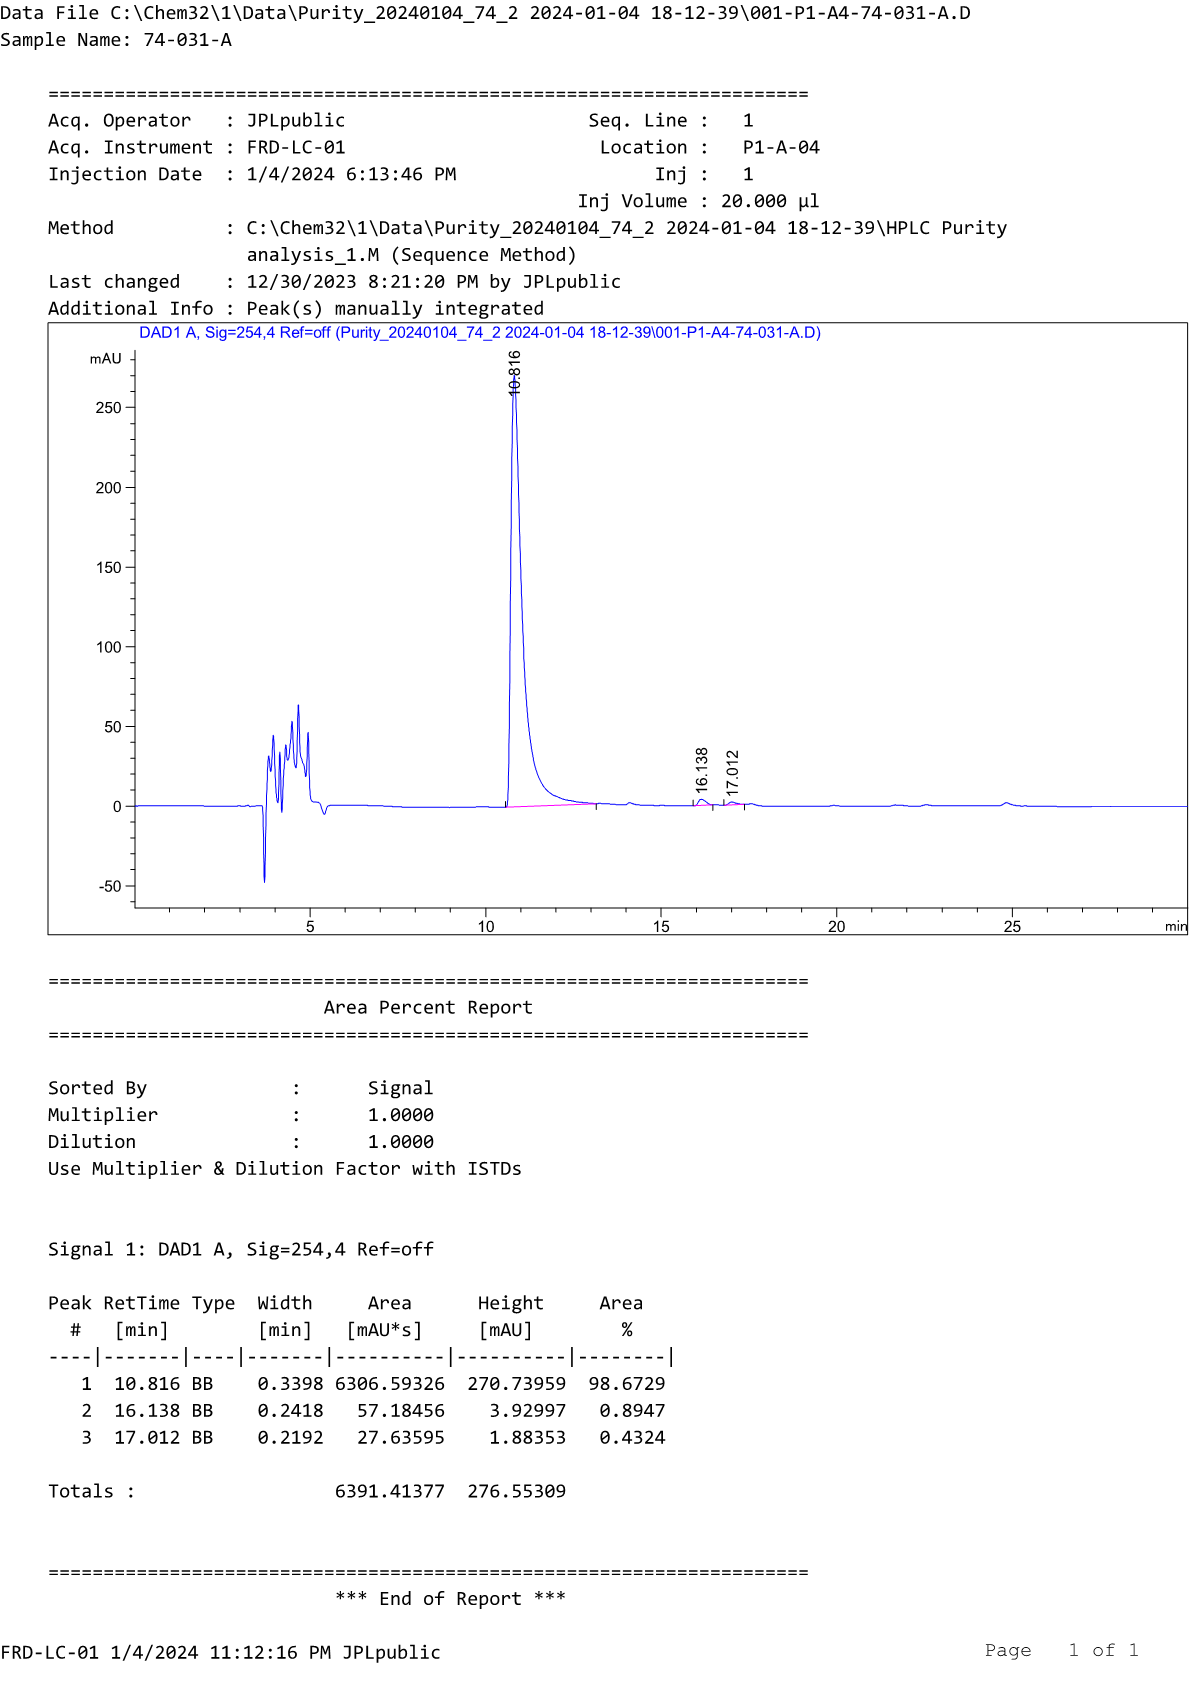


HPLC profile of compound **D2a**


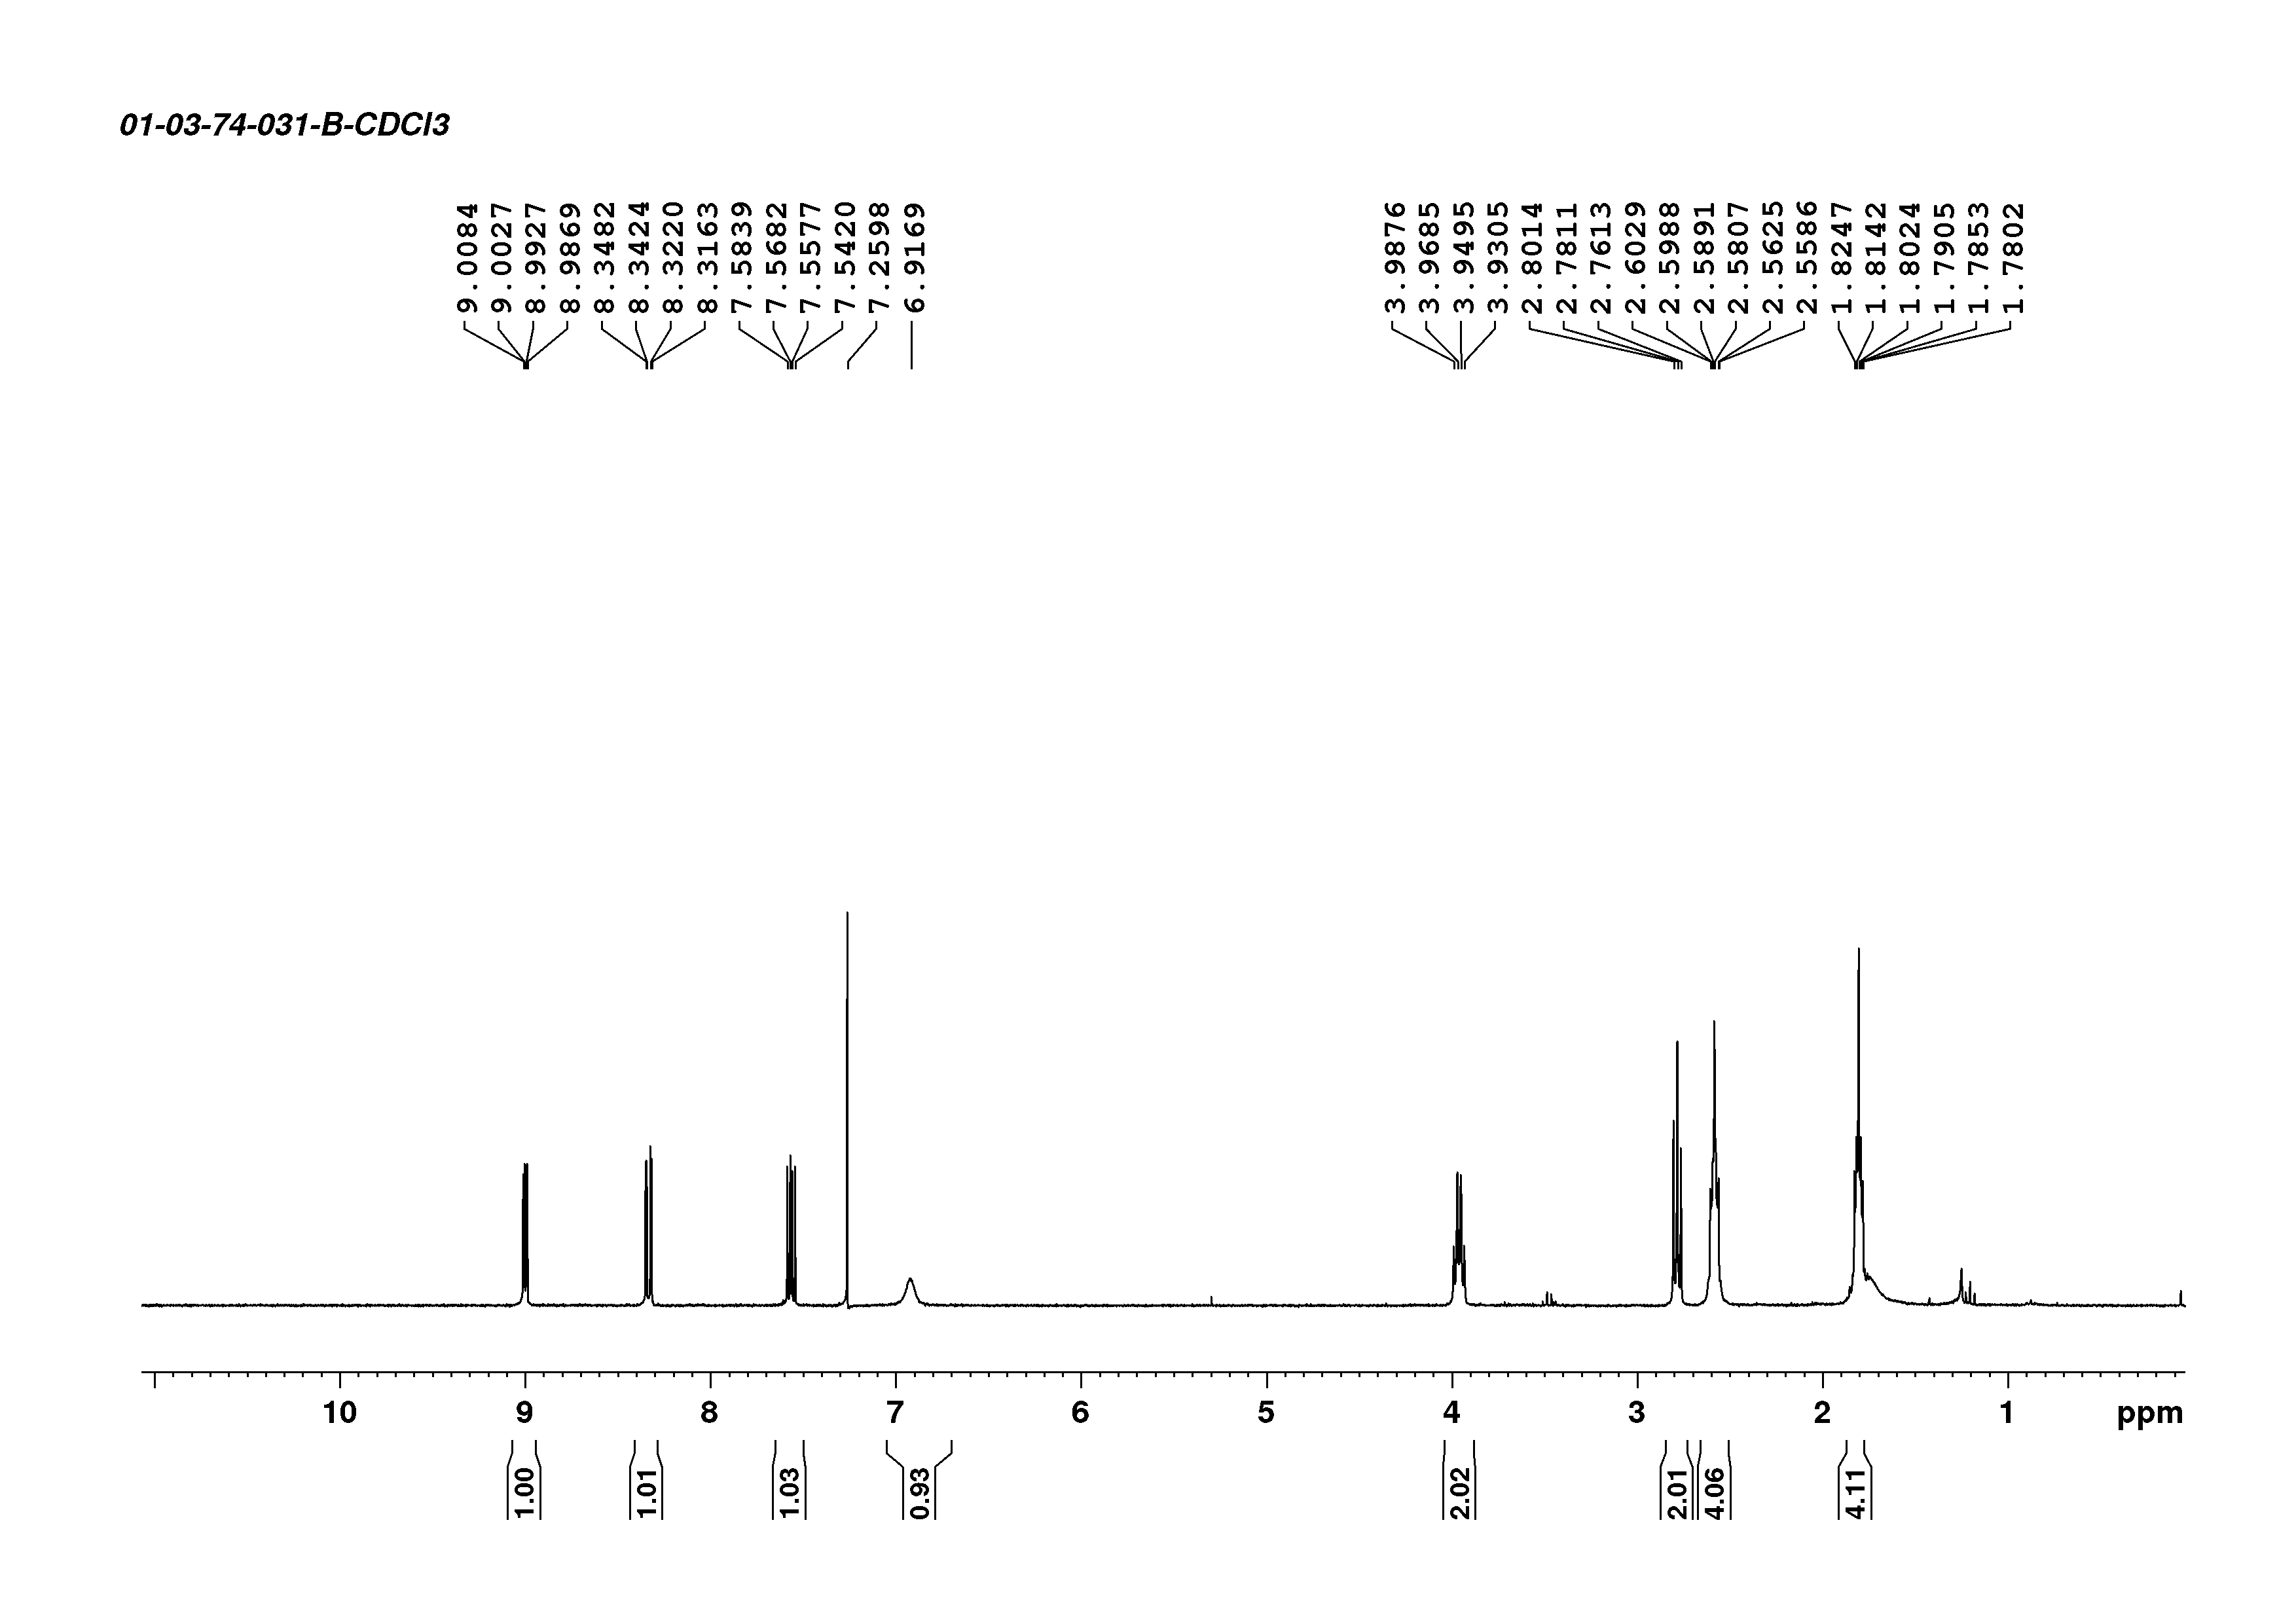


1H-NMR spectrum of compound **D2b**

**
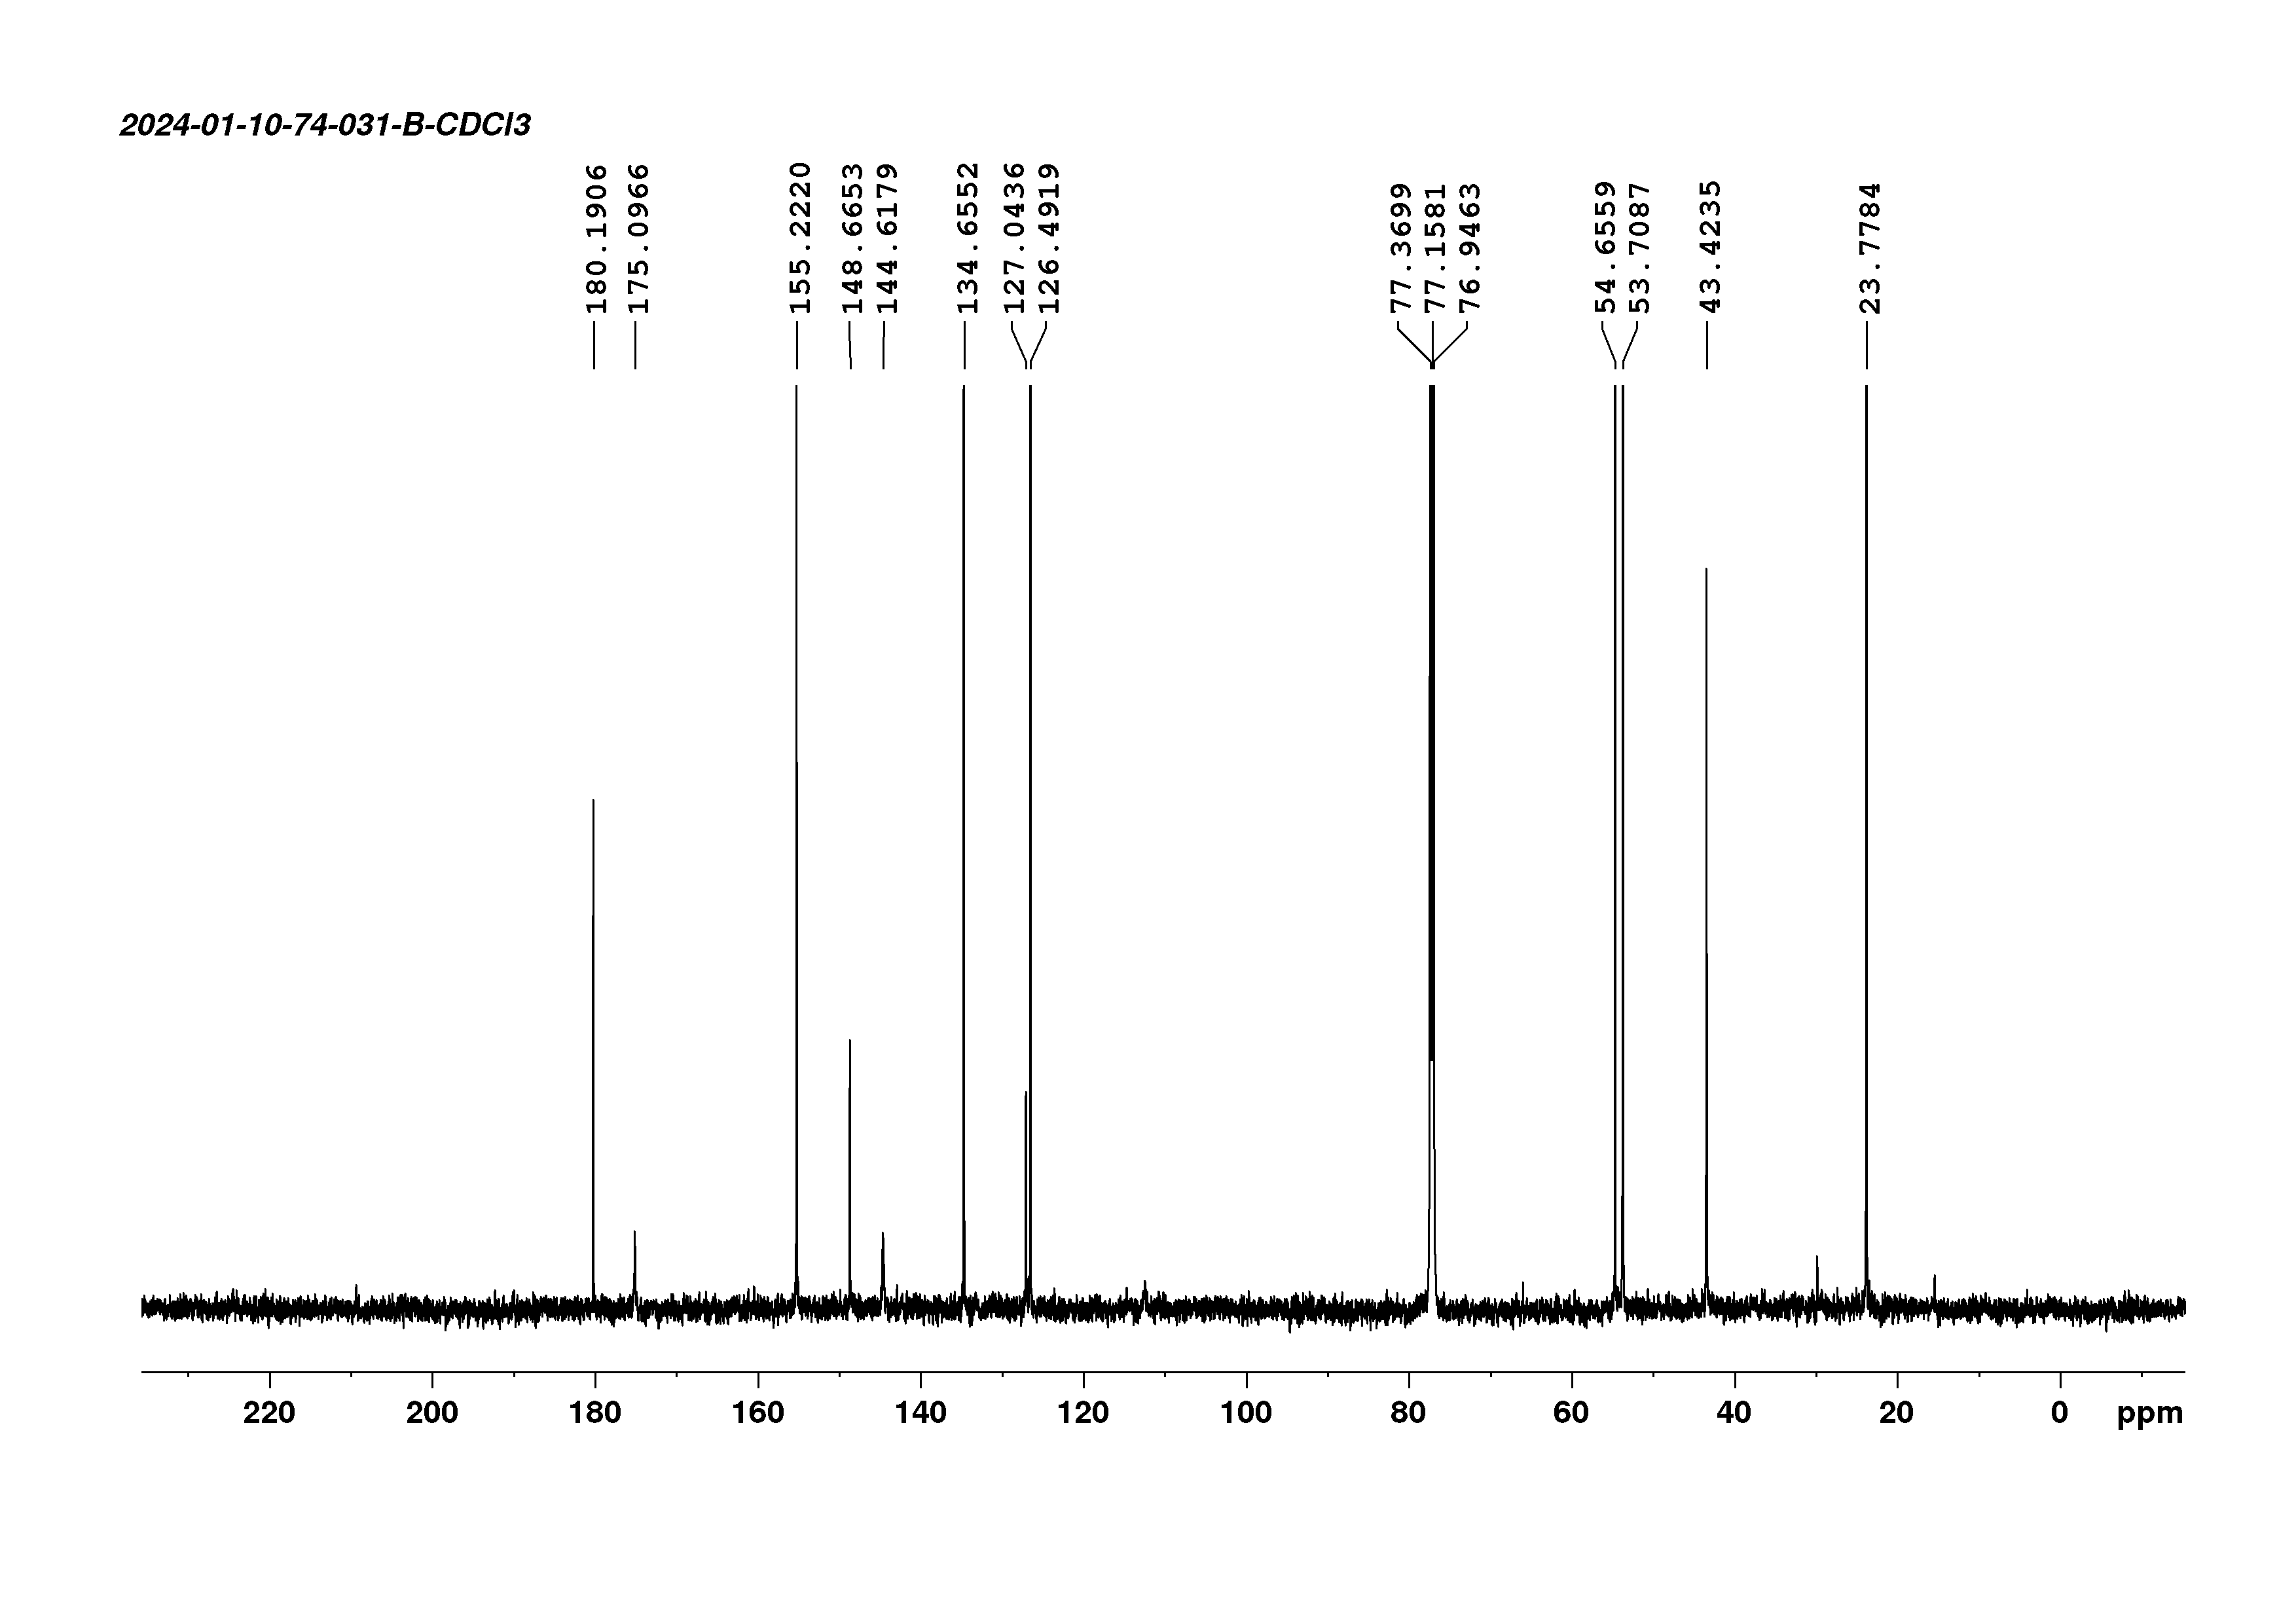
**

13C-NMR spectrum of compound **D2b**

**
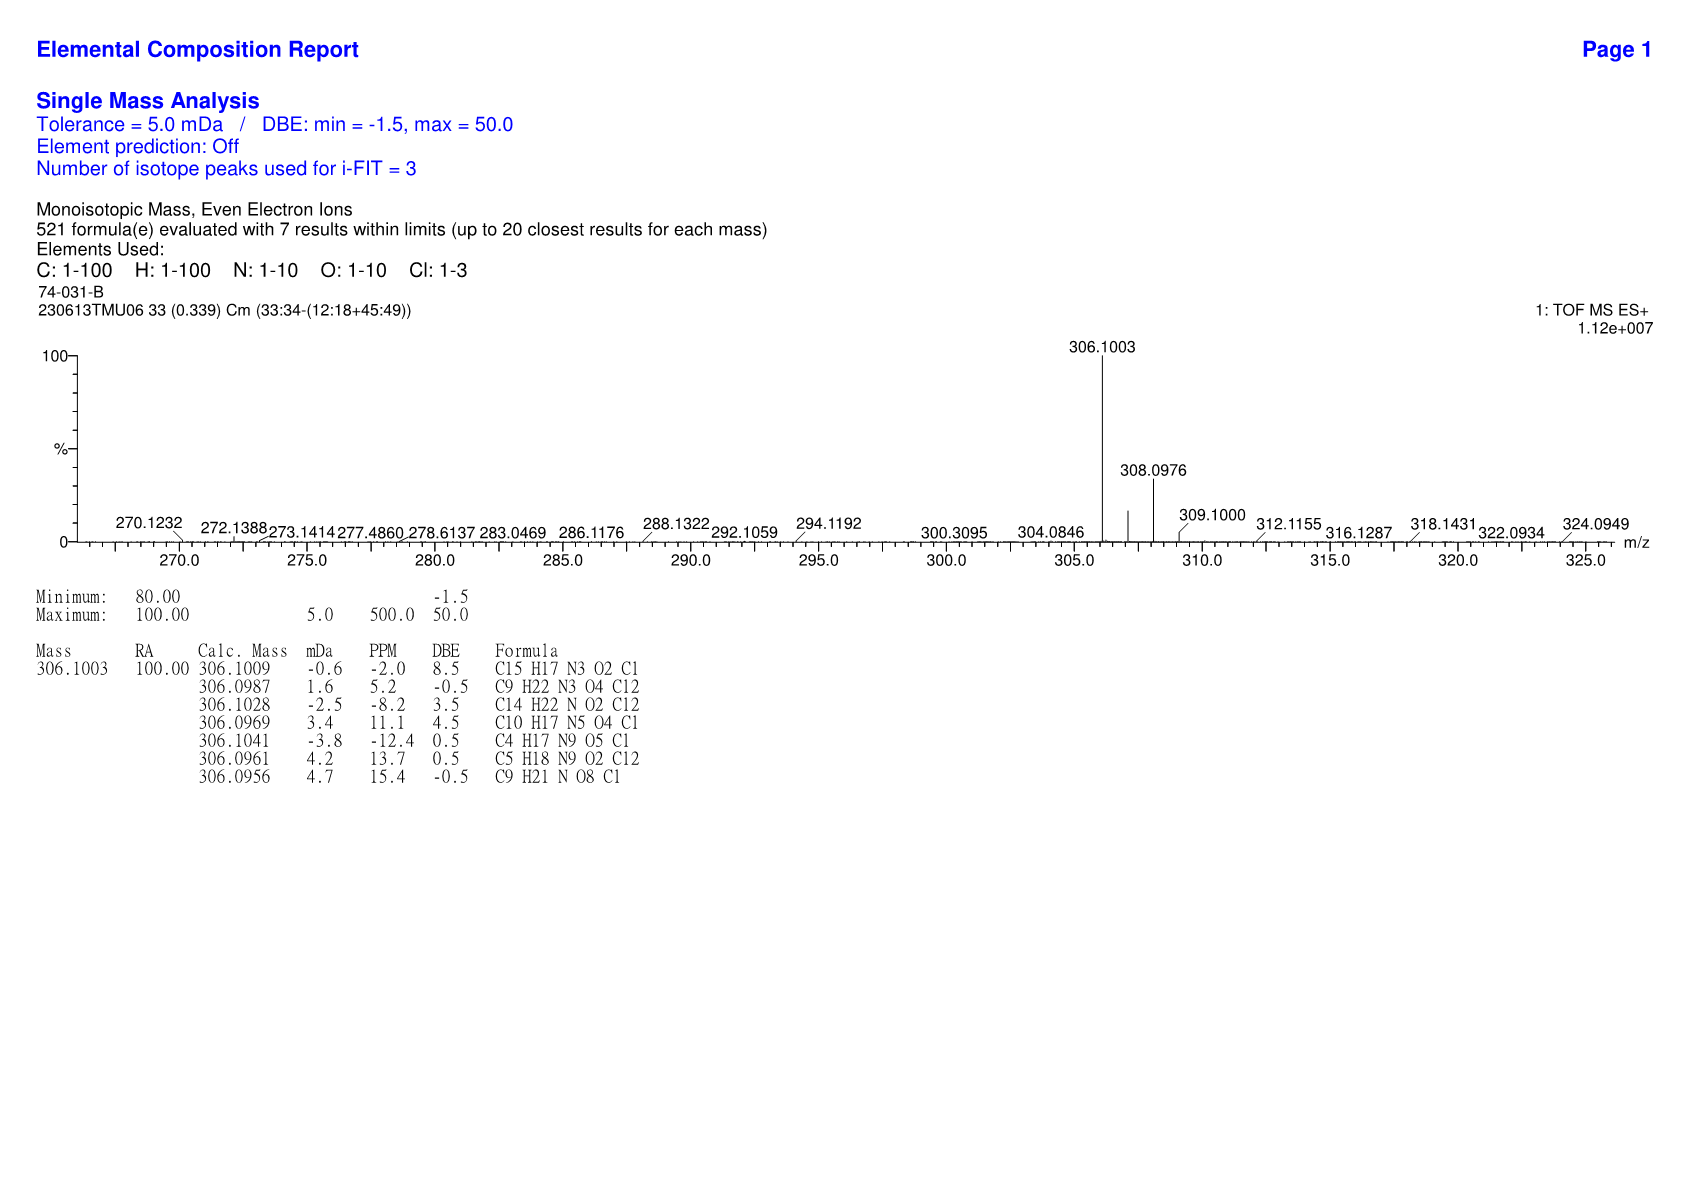
**

HRMS spectrum of compound **Db**


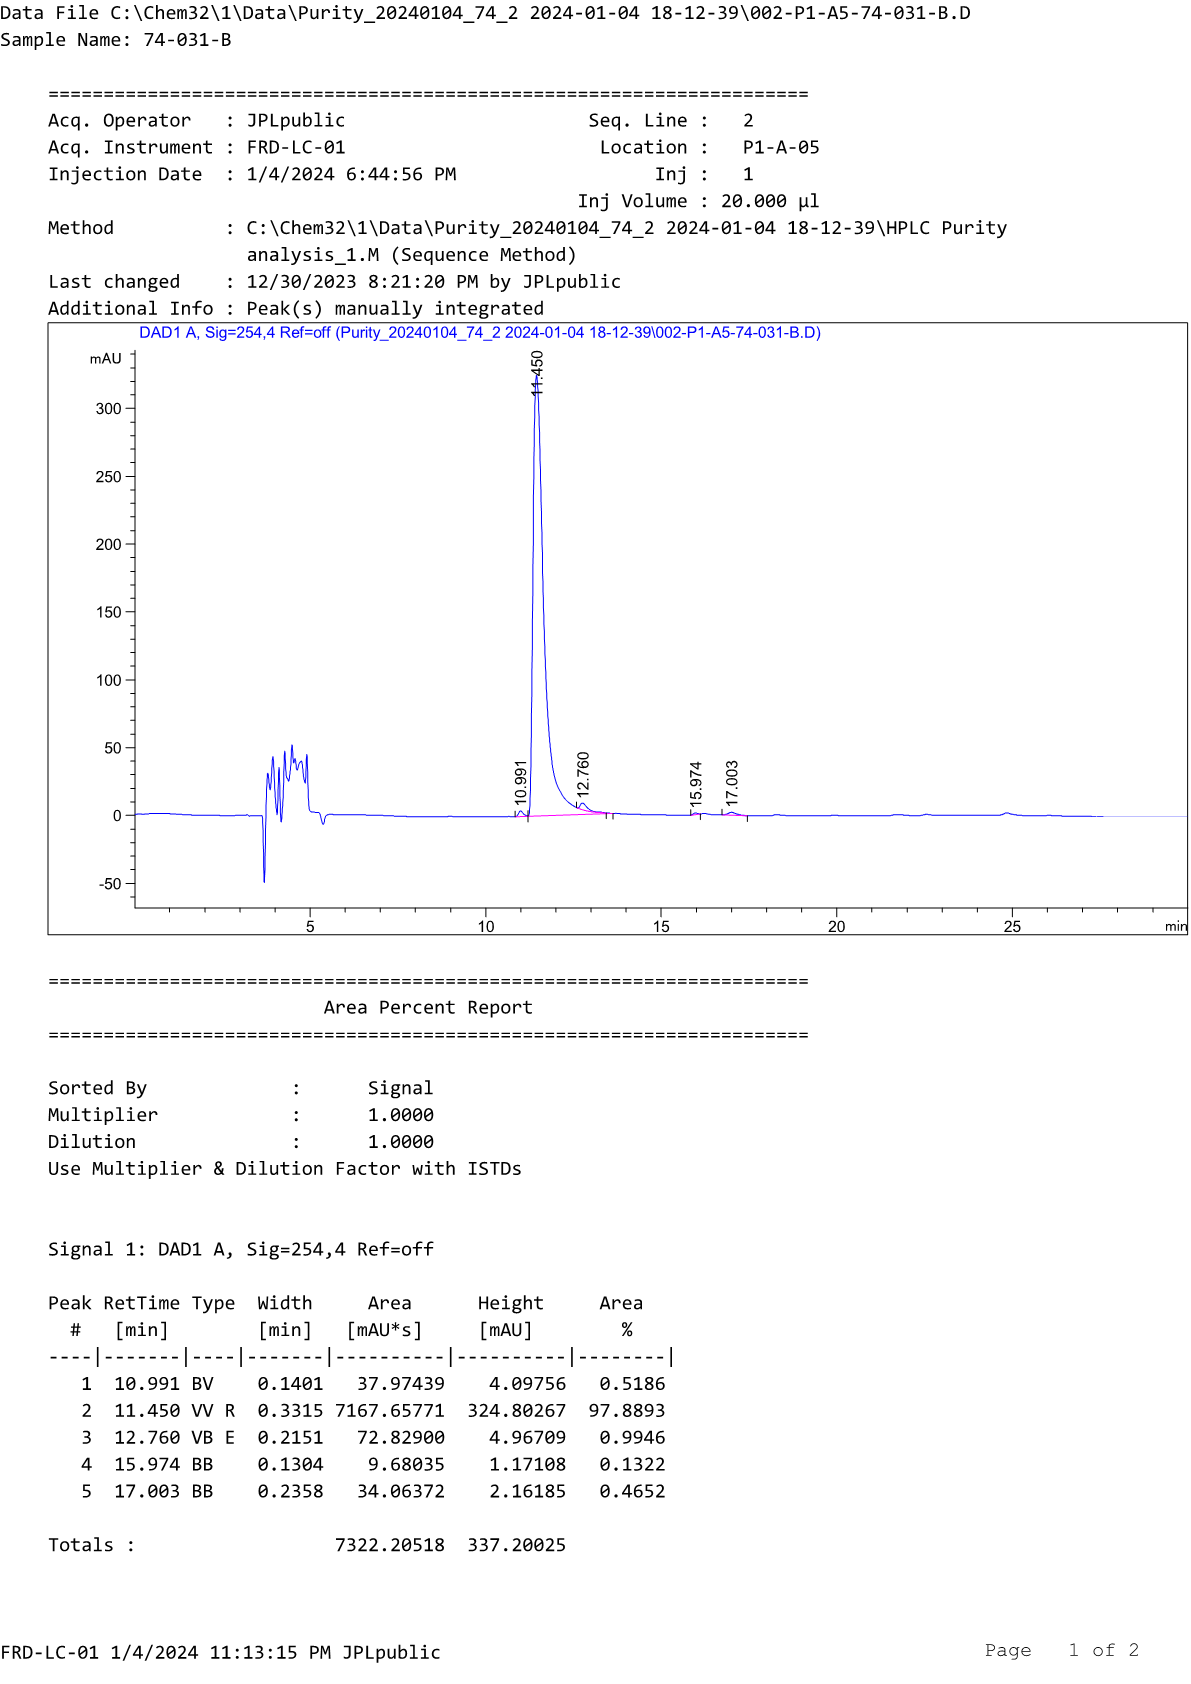


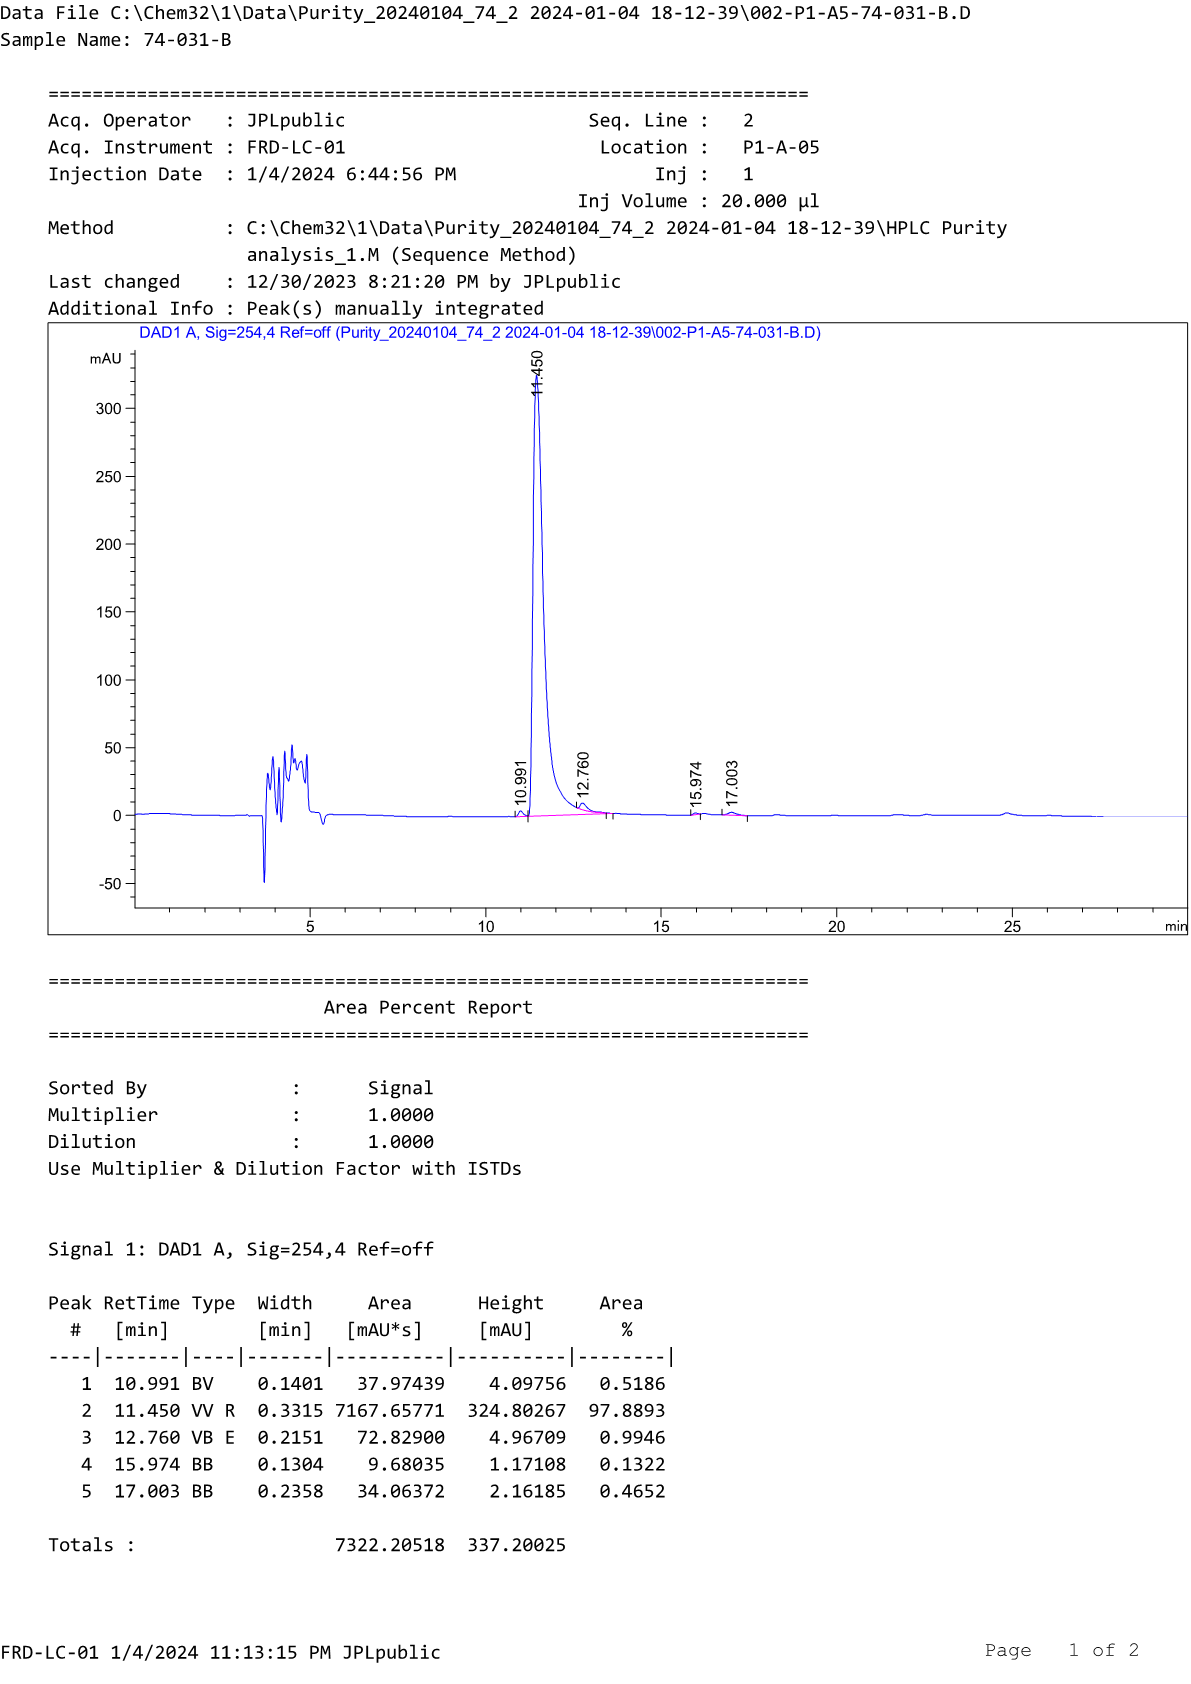


HPLC profile of compound **D2b**


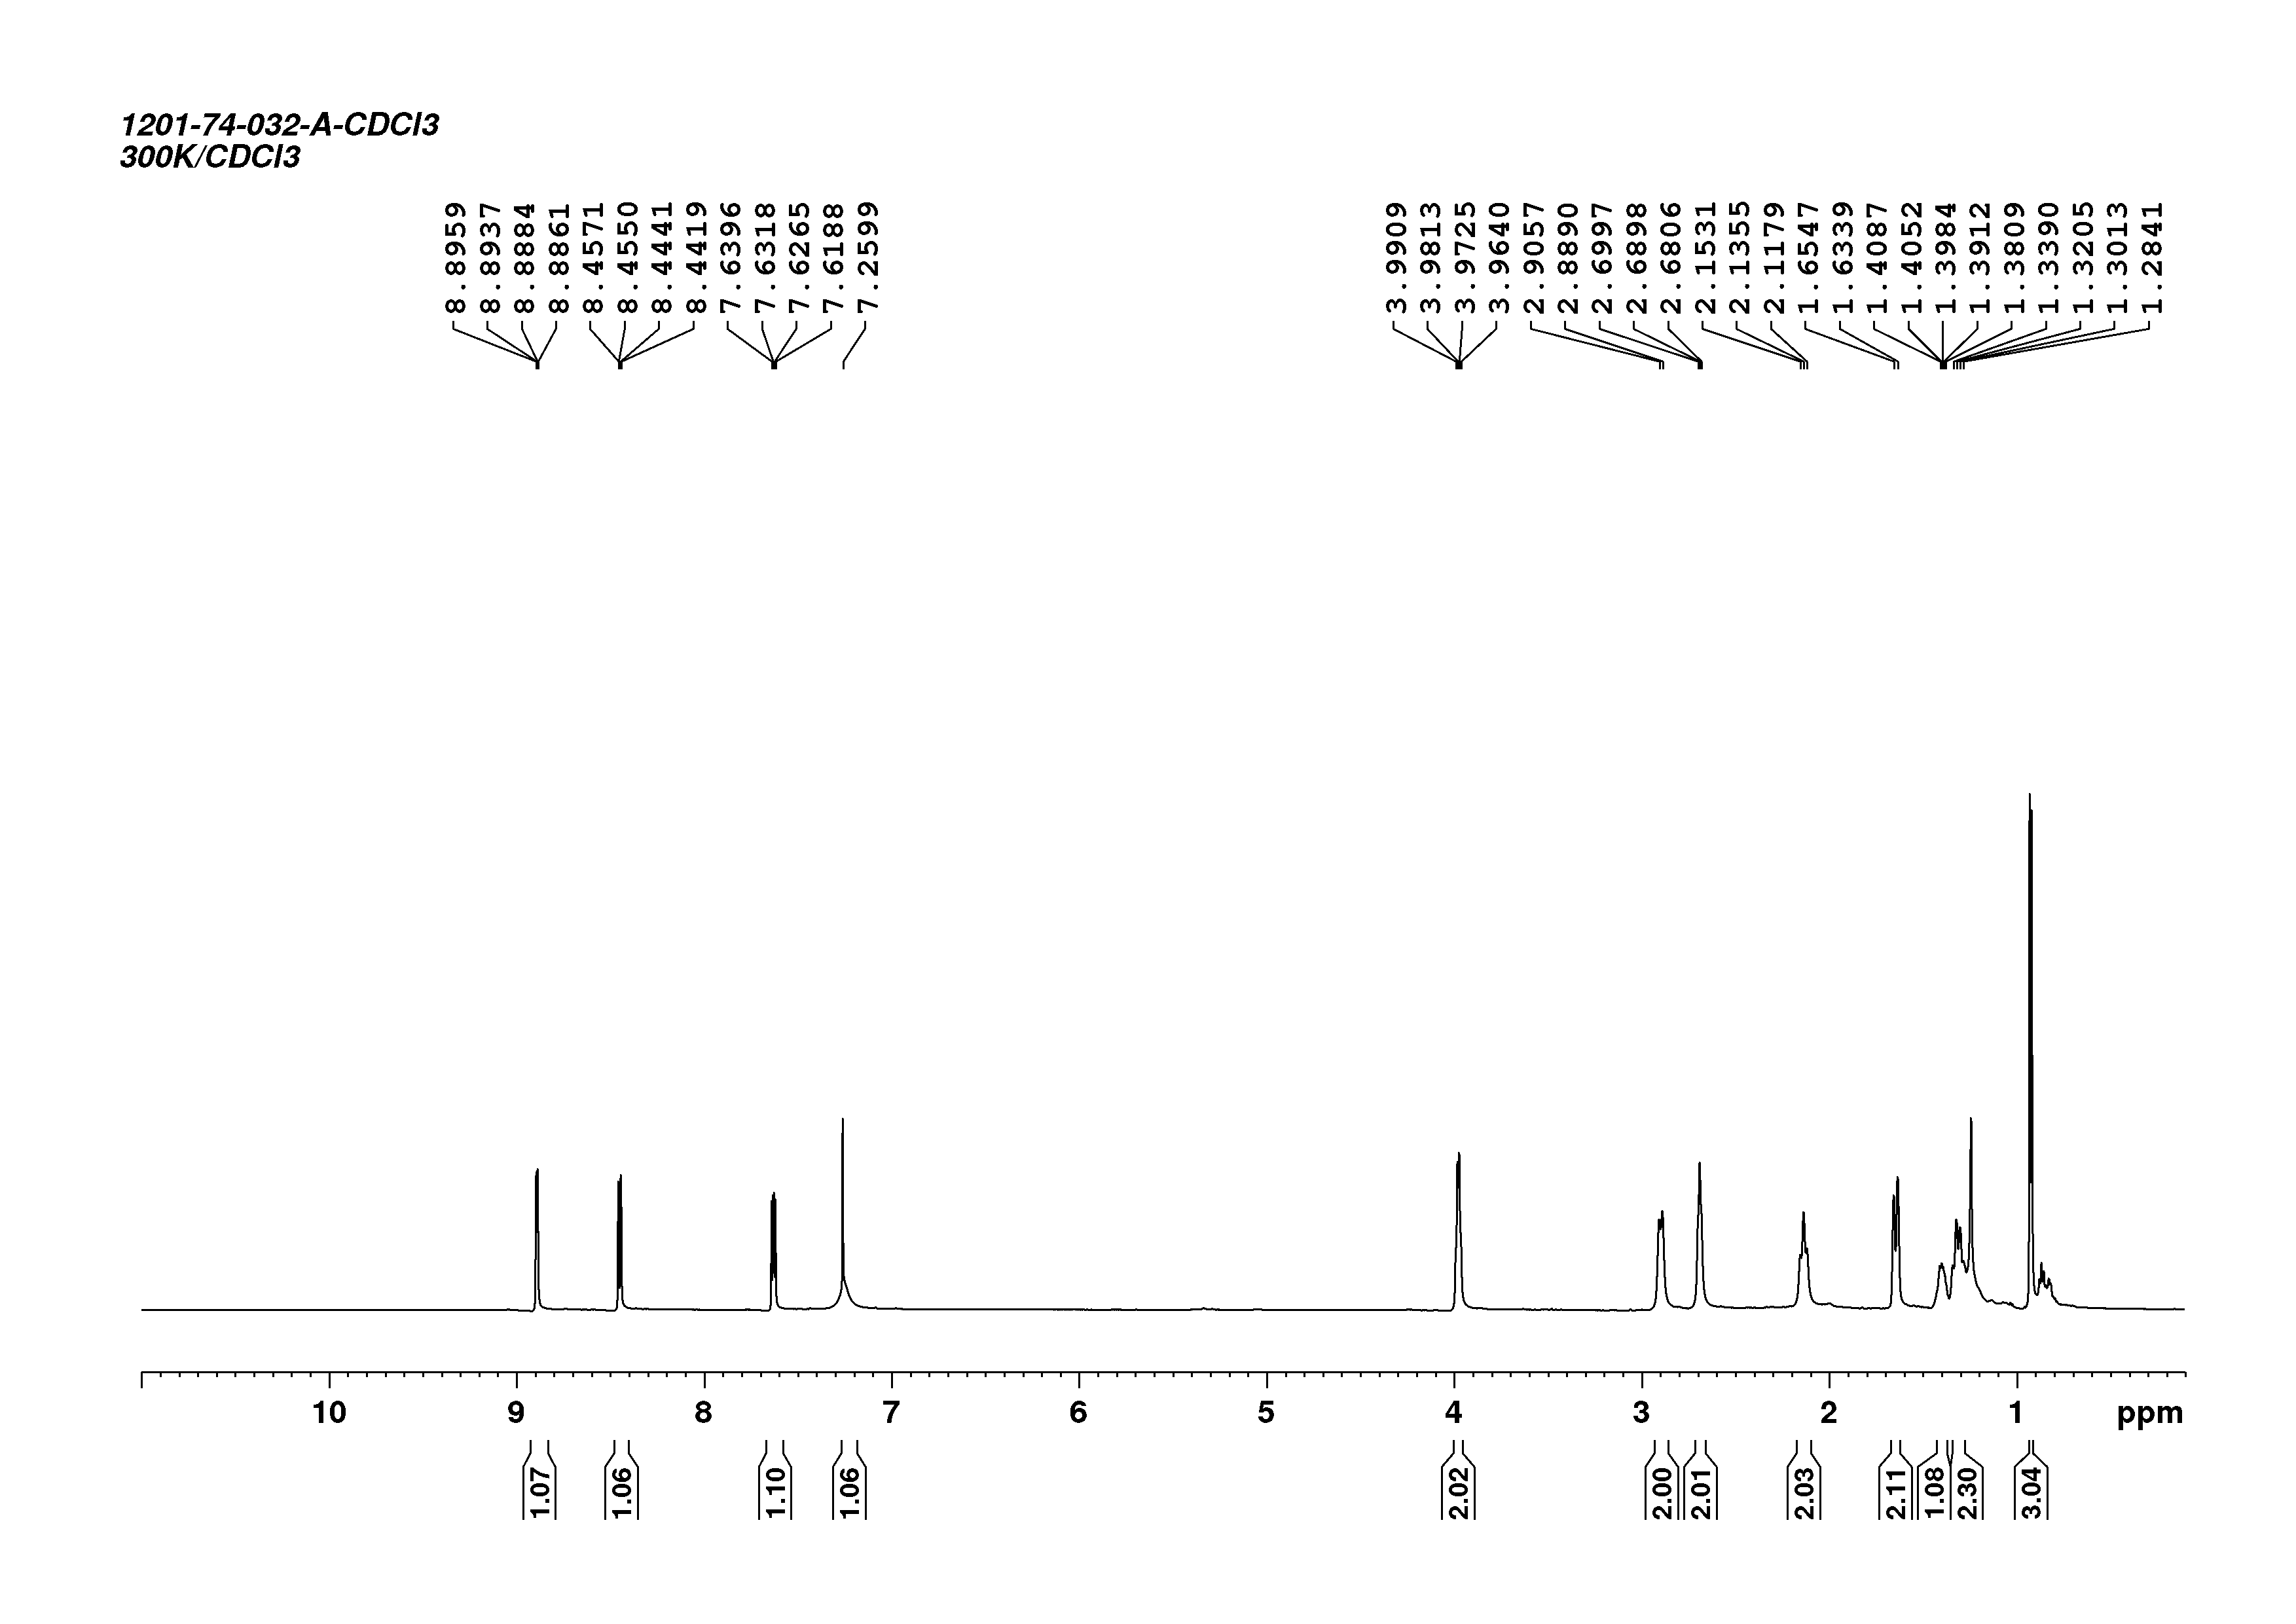


1H-NMR spectrum of compound **D3a**


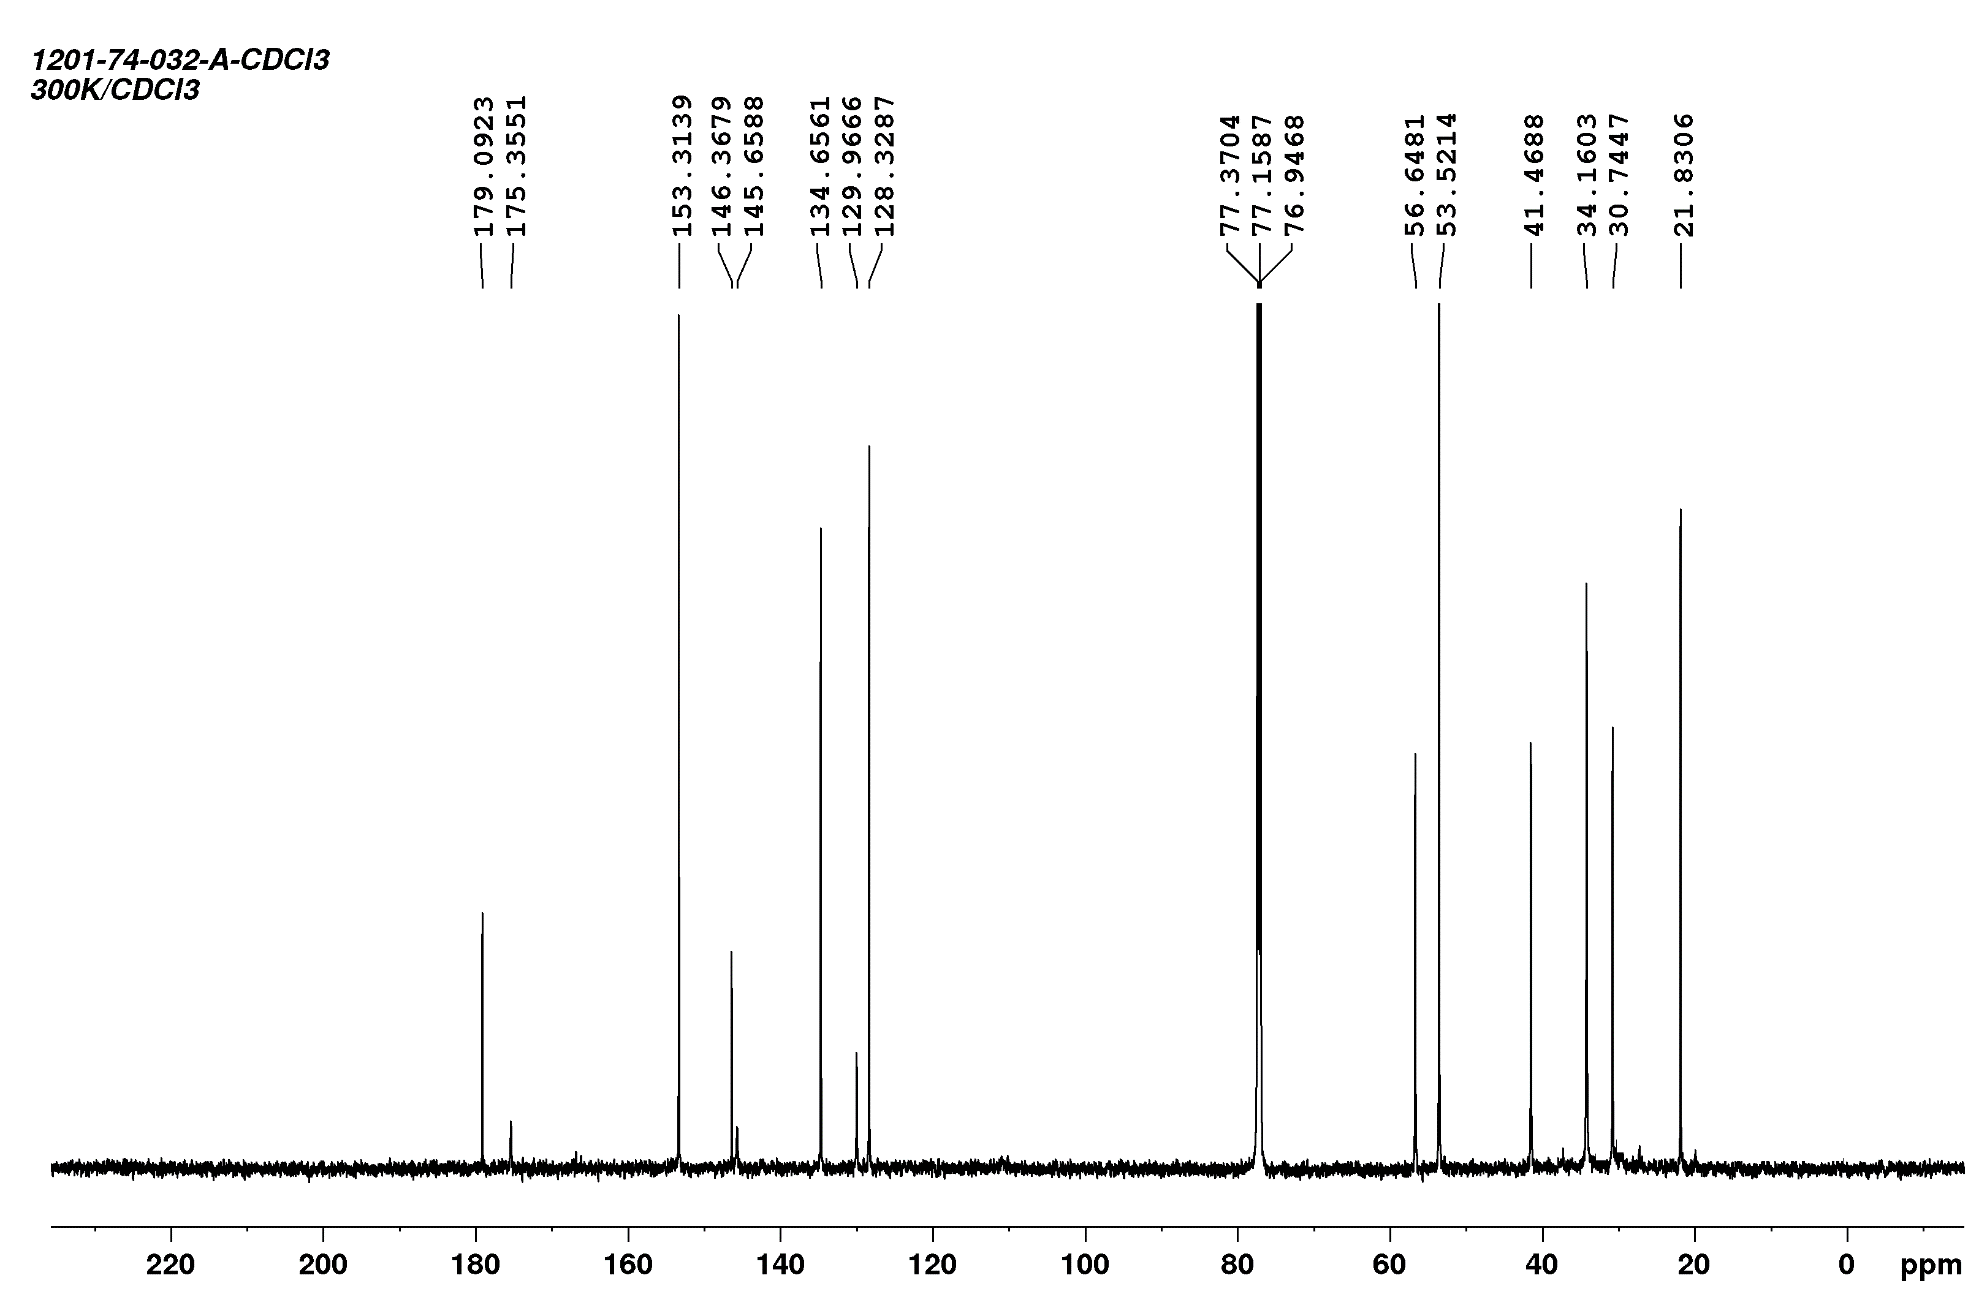


13C-NMR spectrum of compound **D3a**

**
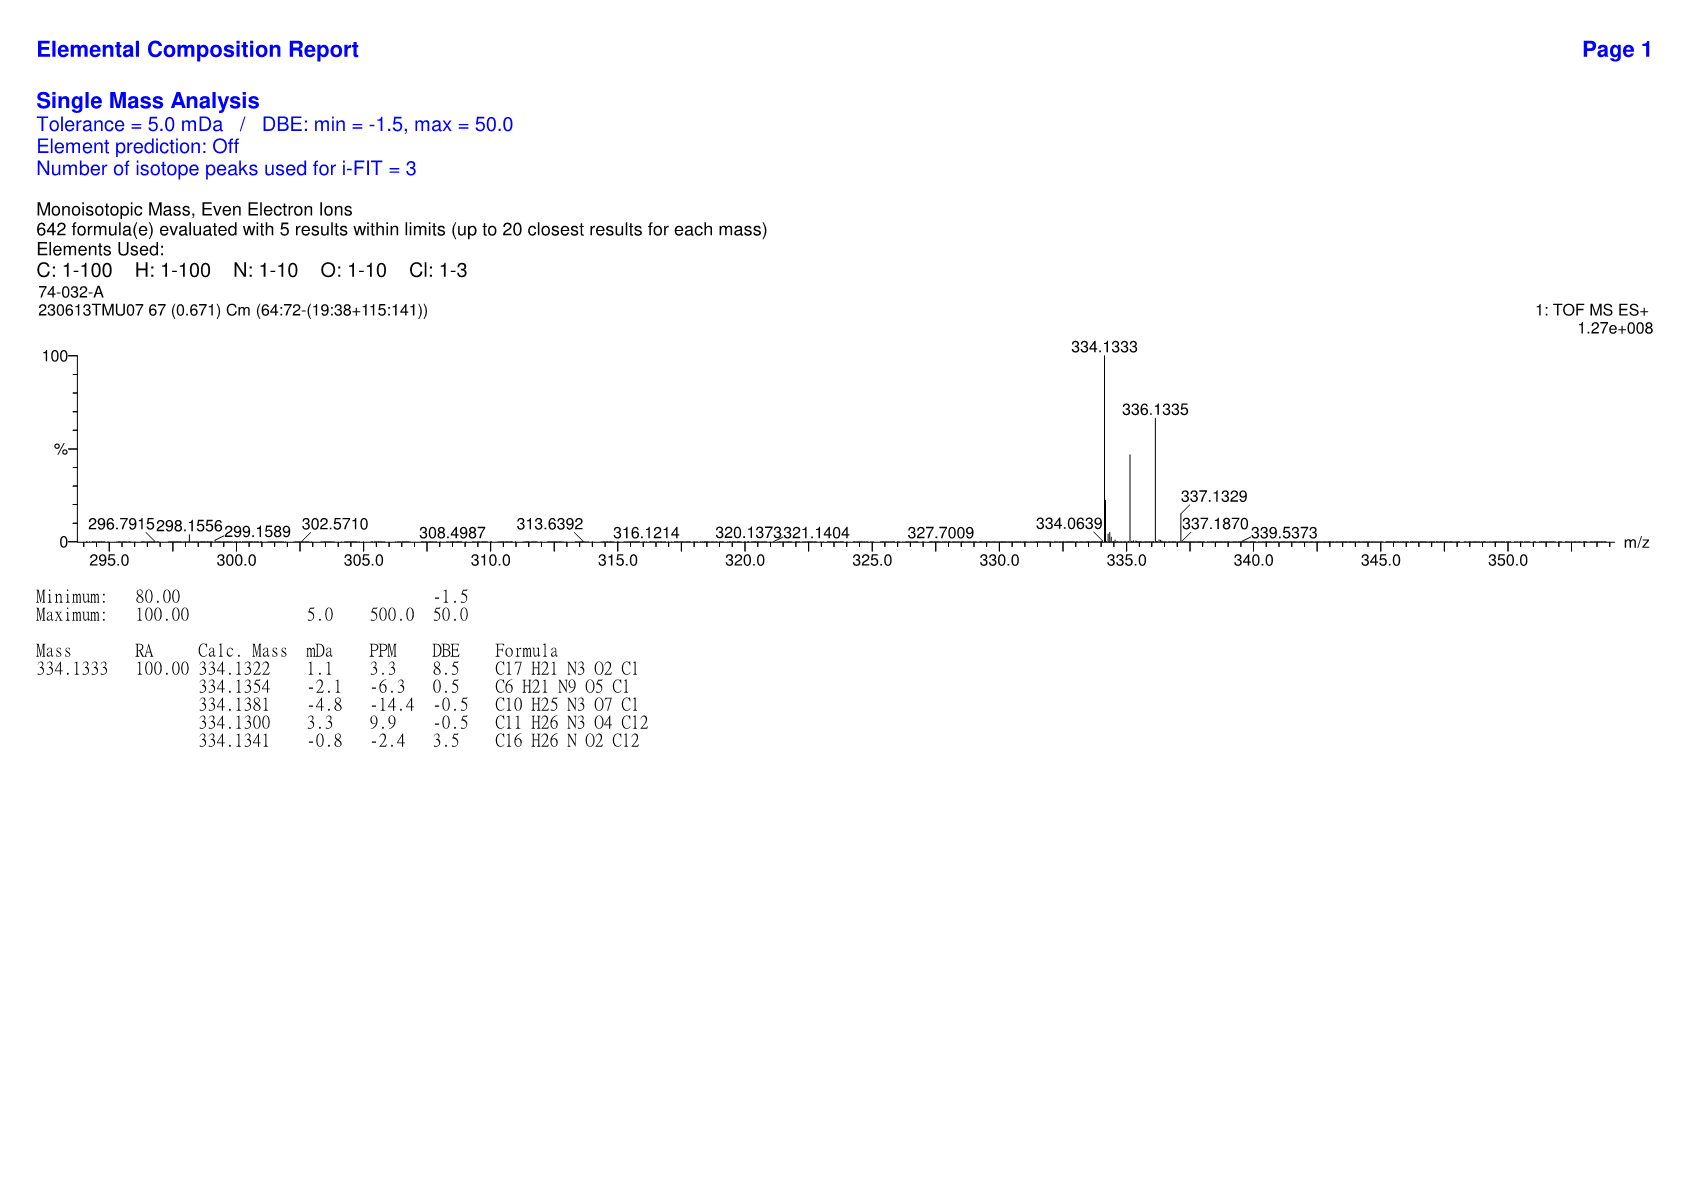
**

HRMS spectrum of compound **D3a**


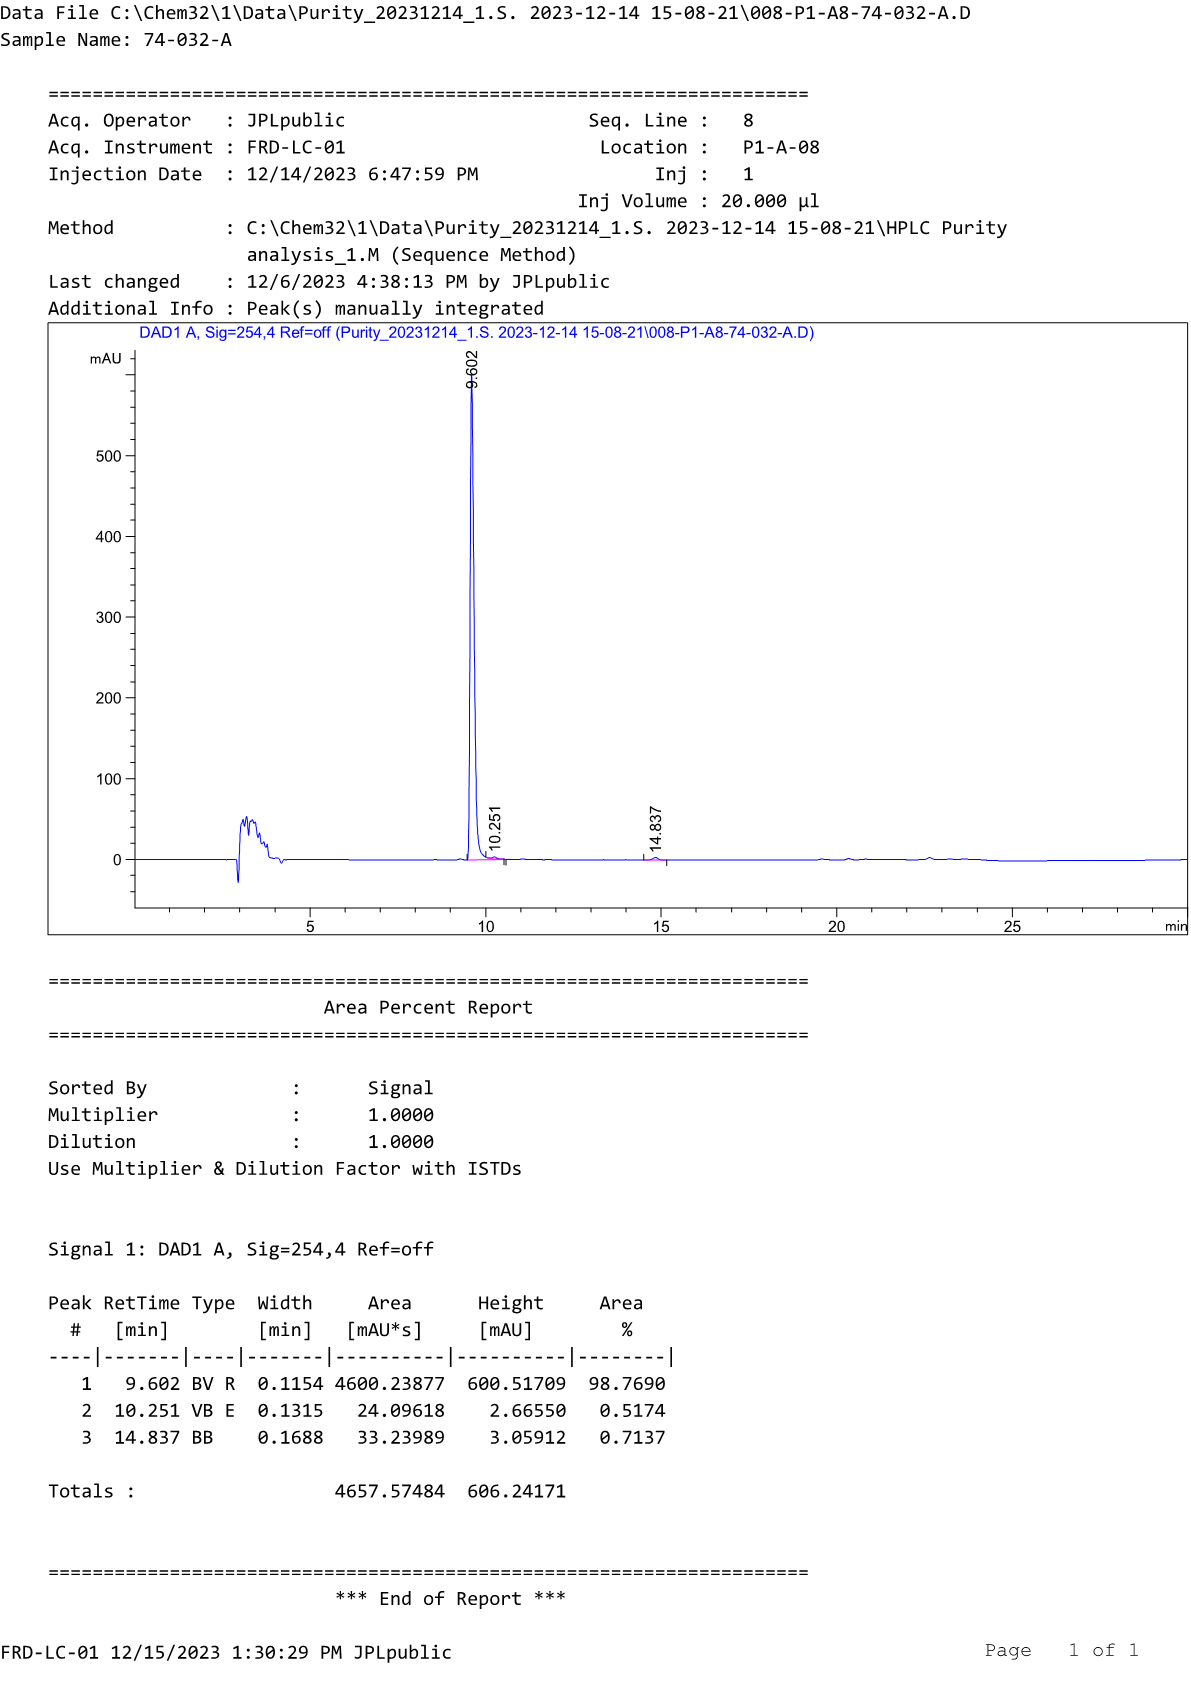


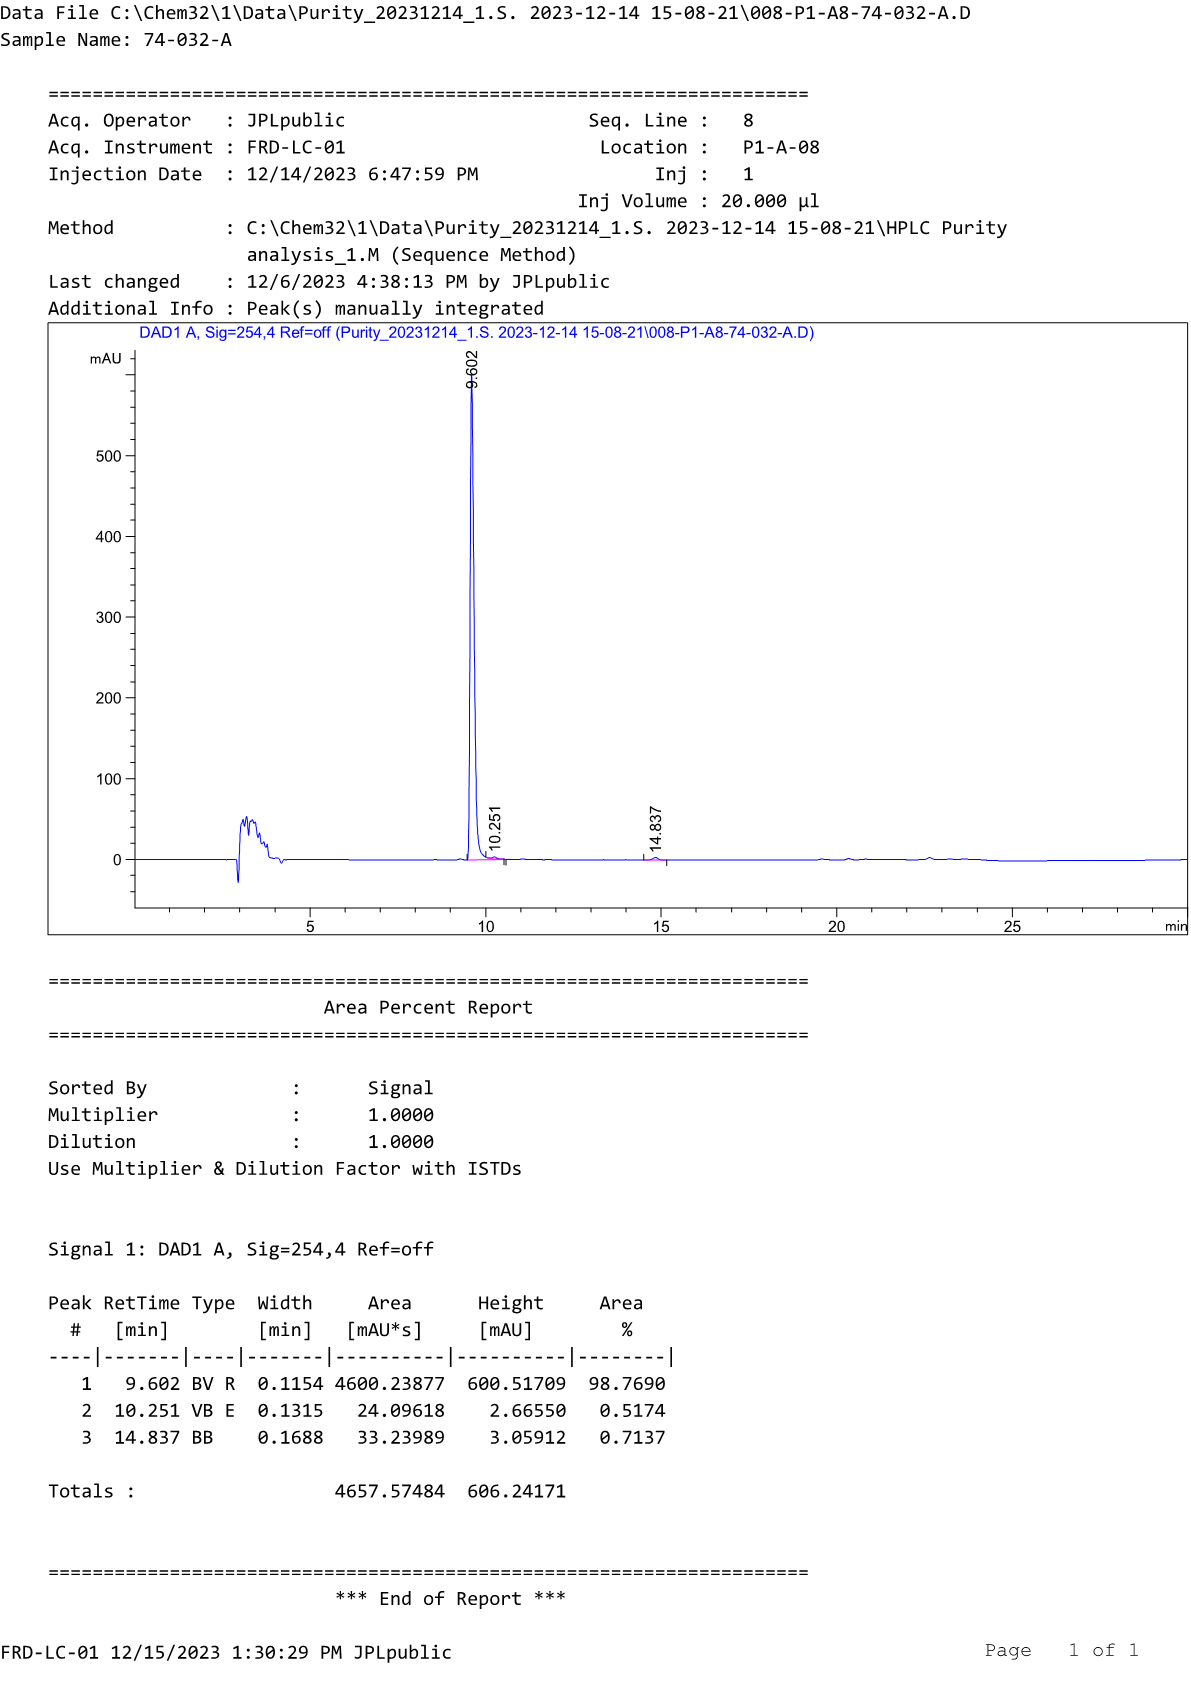


HPLC profile of compound **D3a**


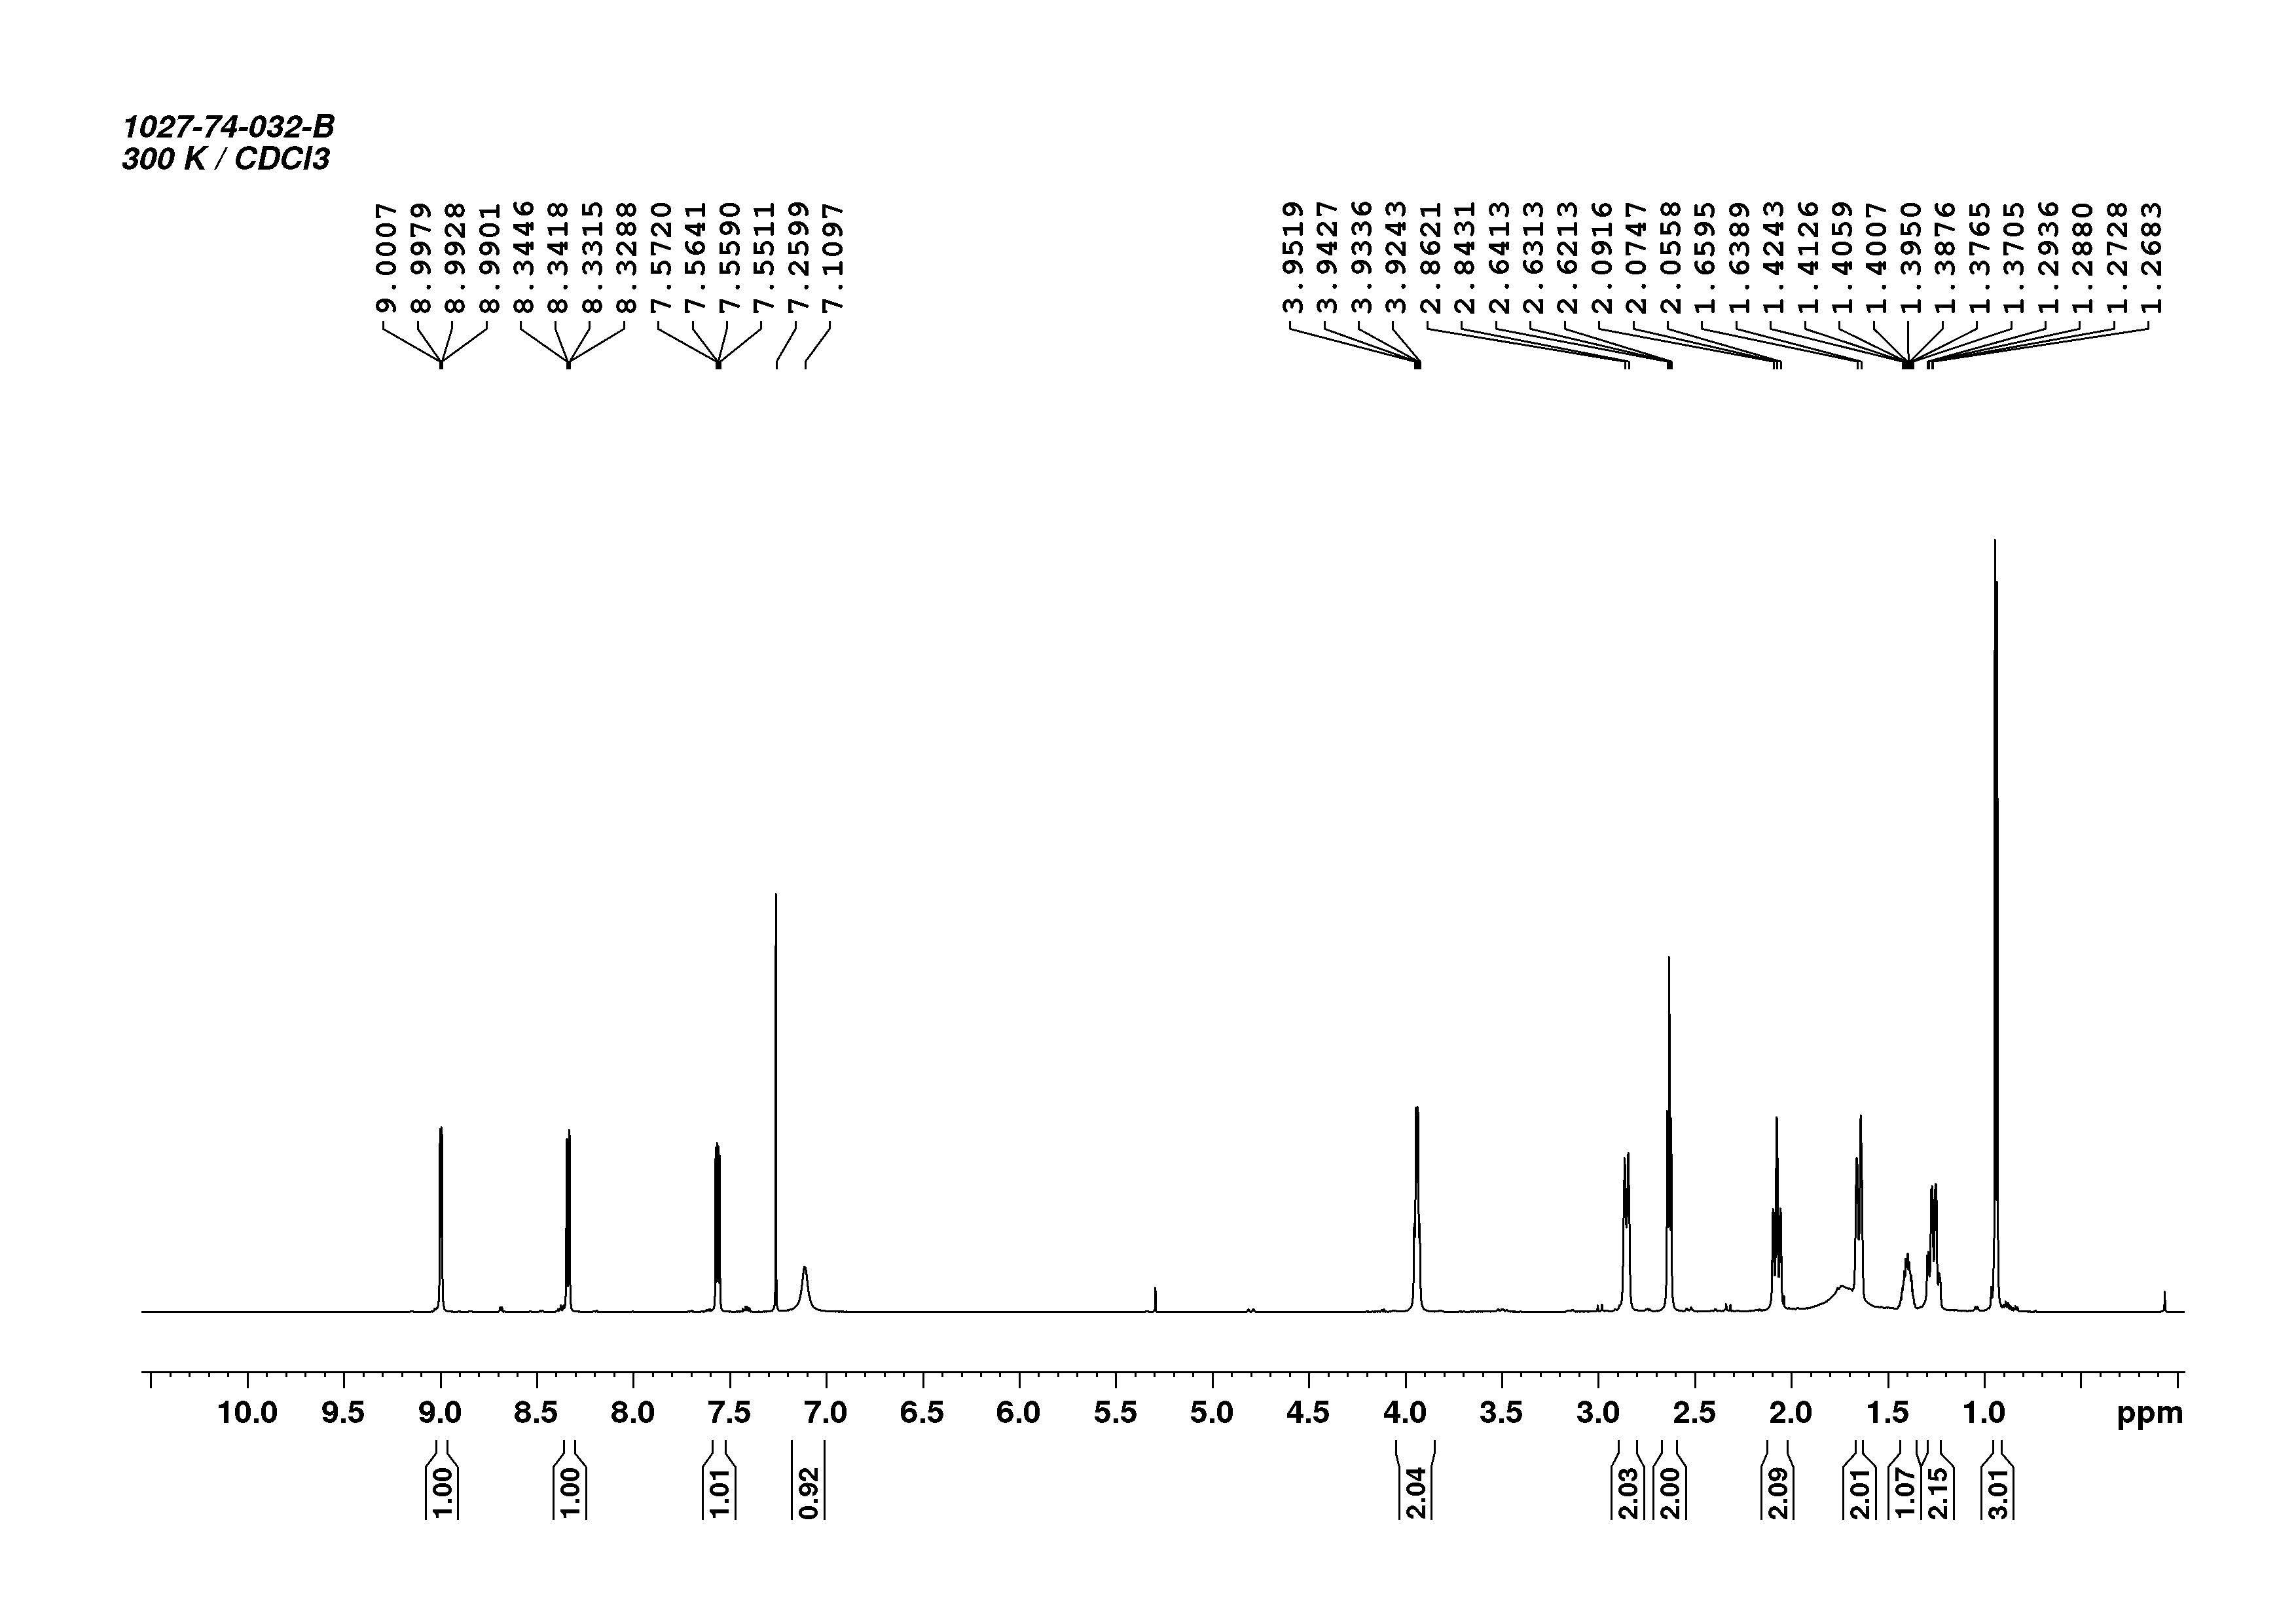


1H-NMR spectrum of compound **D3b**


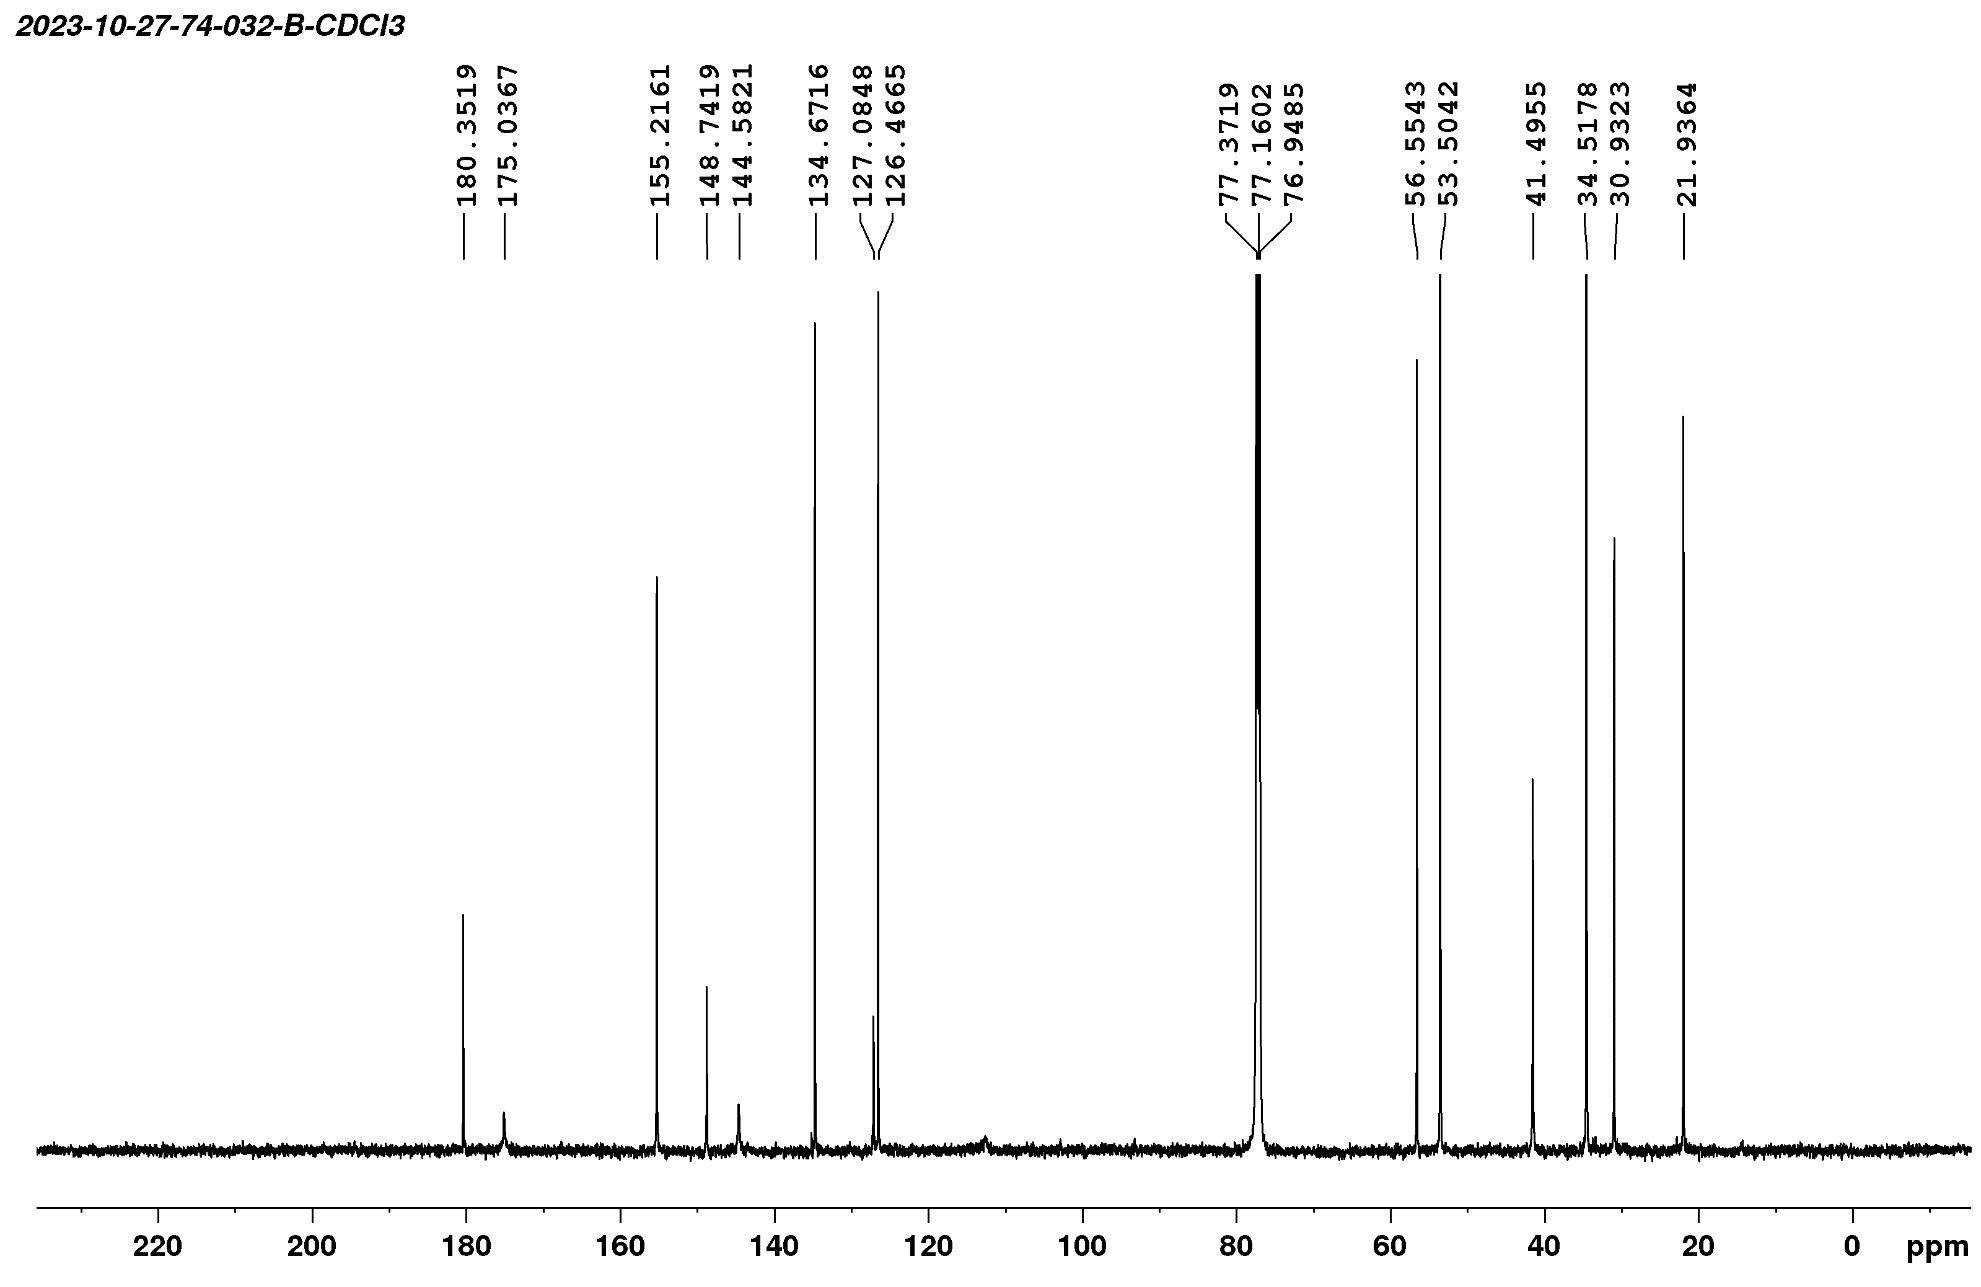


13C-NMR spectrum of compound **D3b**

**
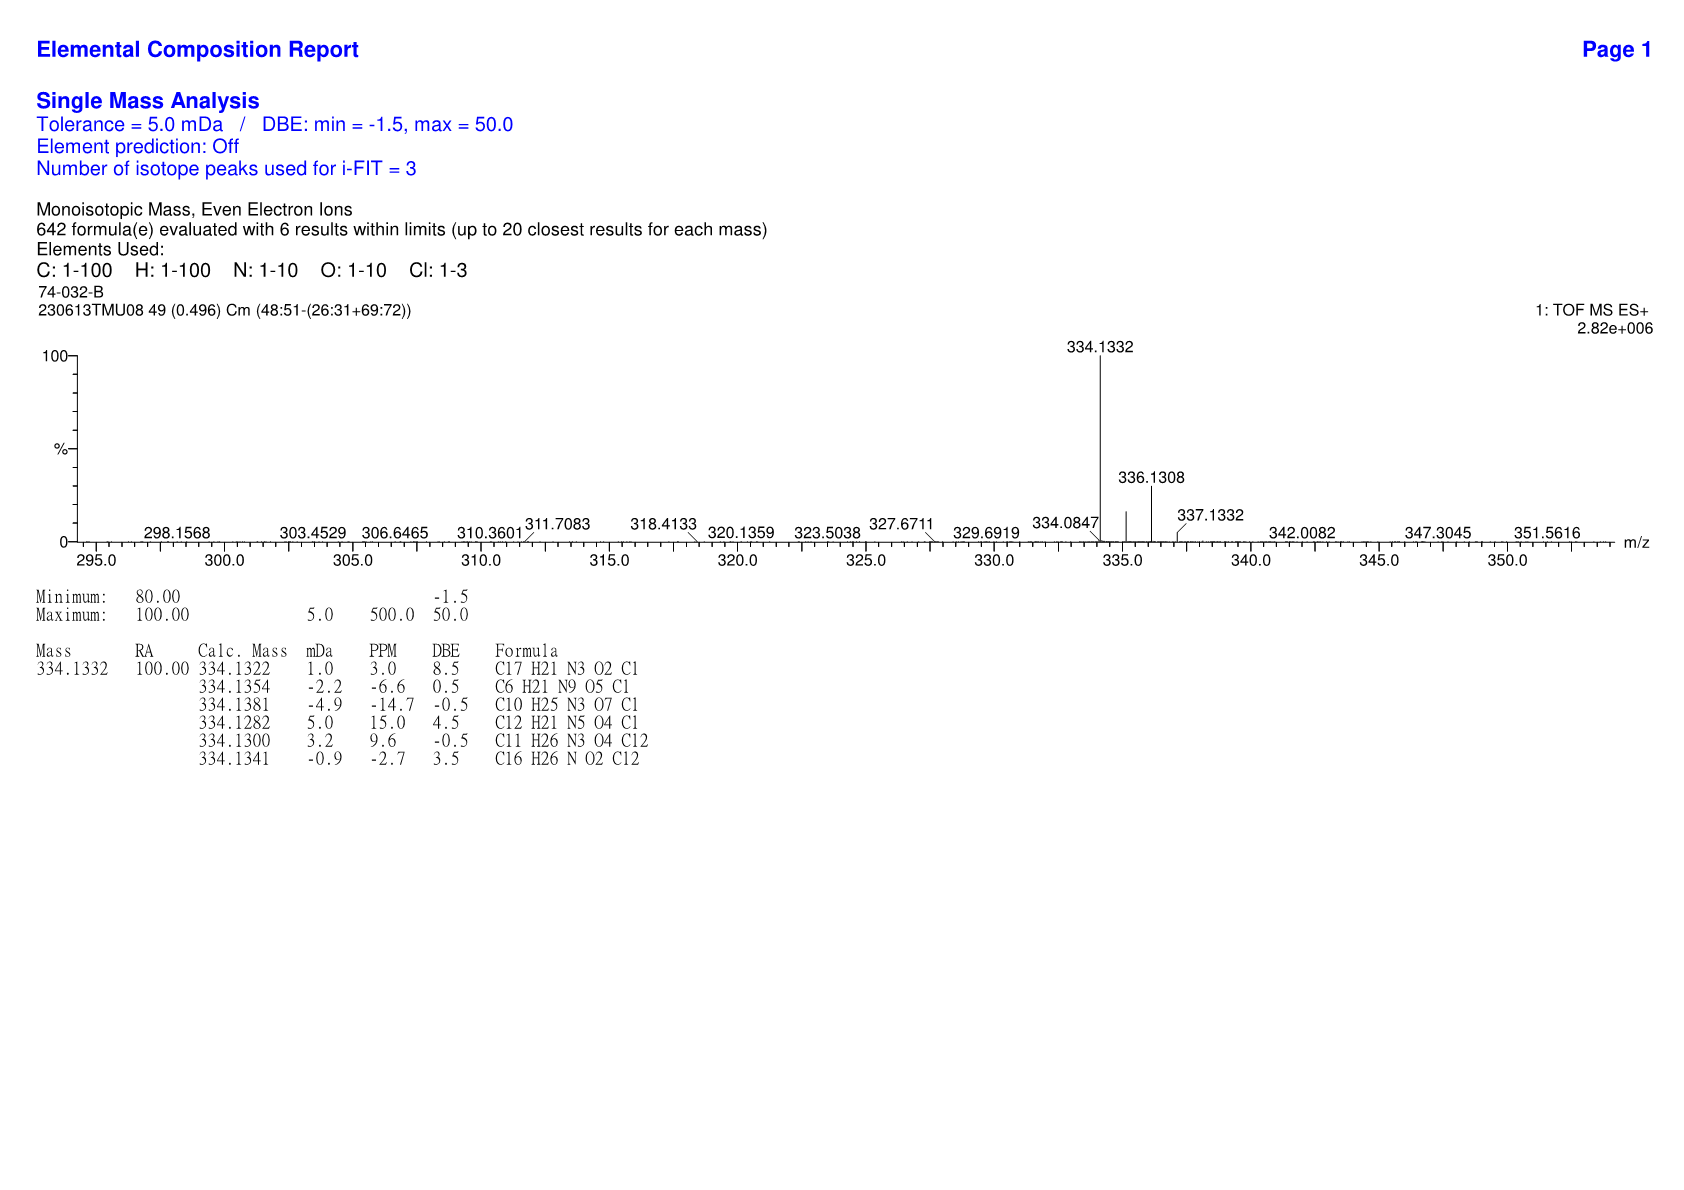
**

HRMS spectrum of compound **D3b**


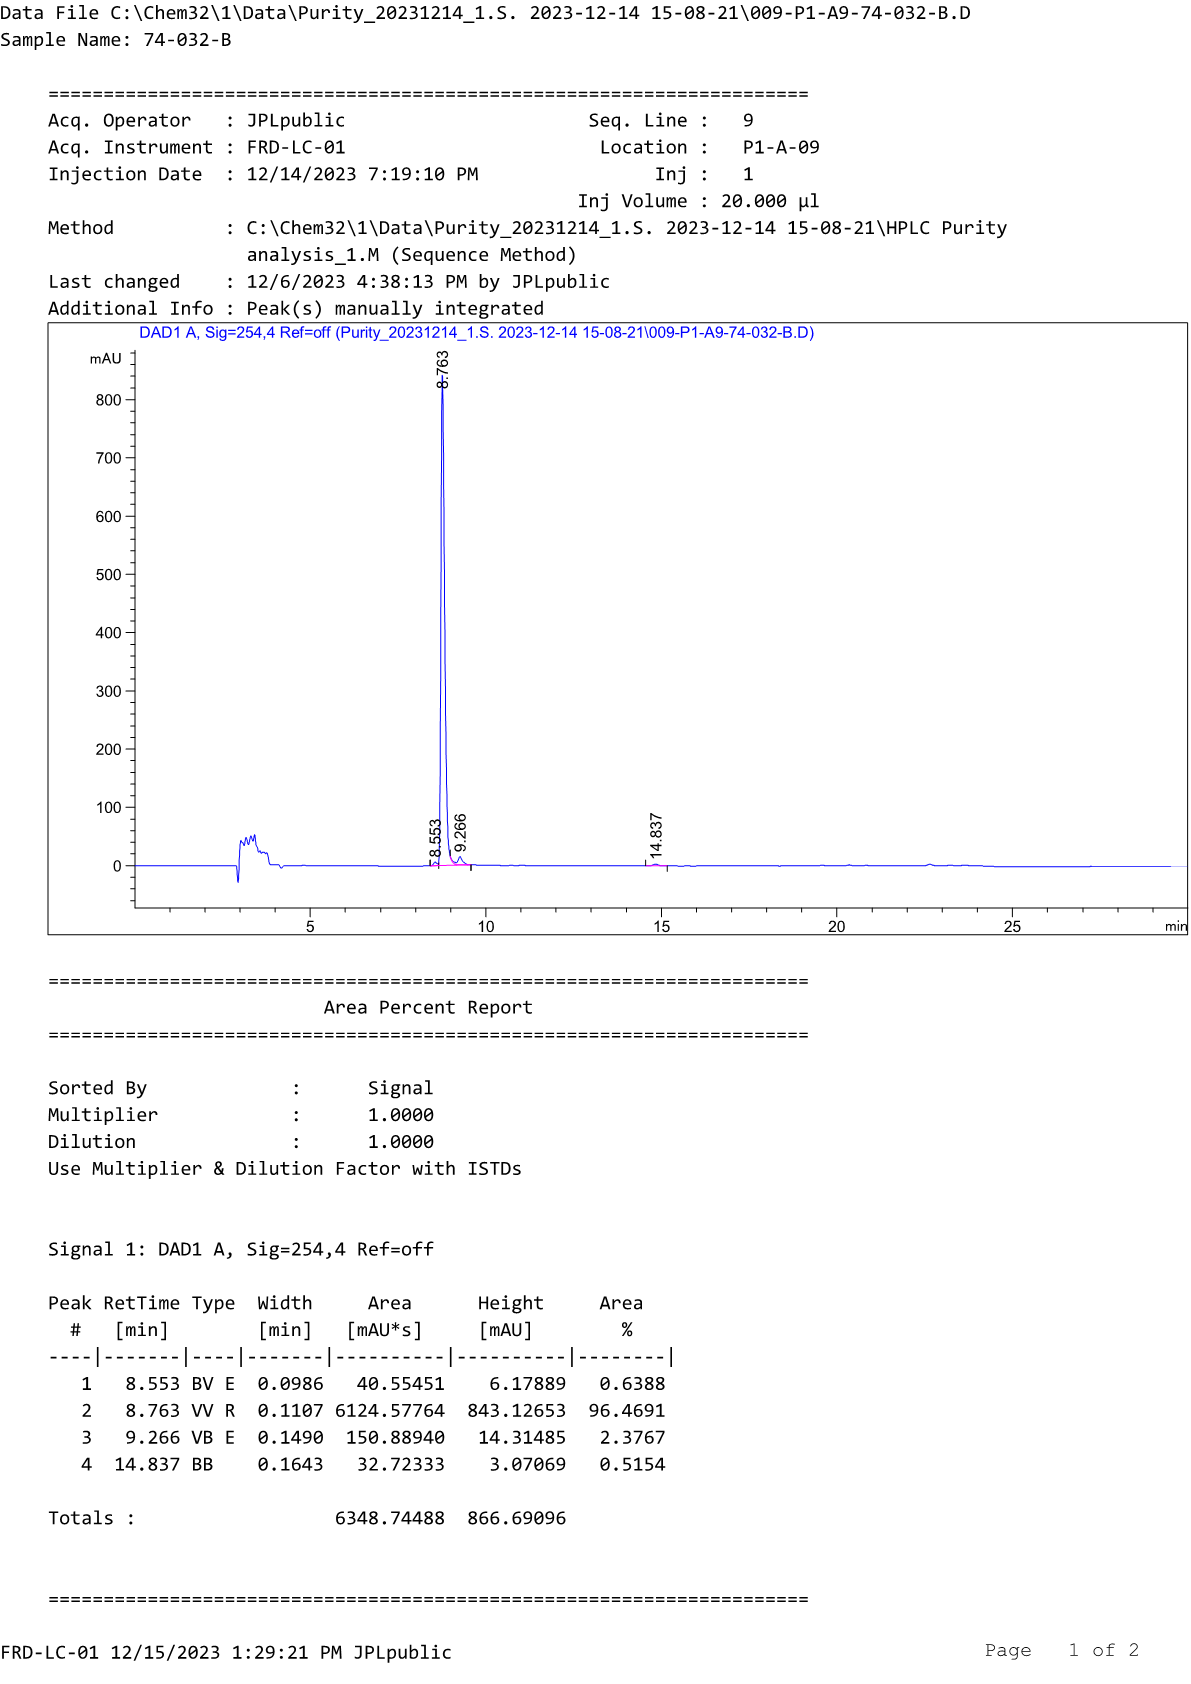


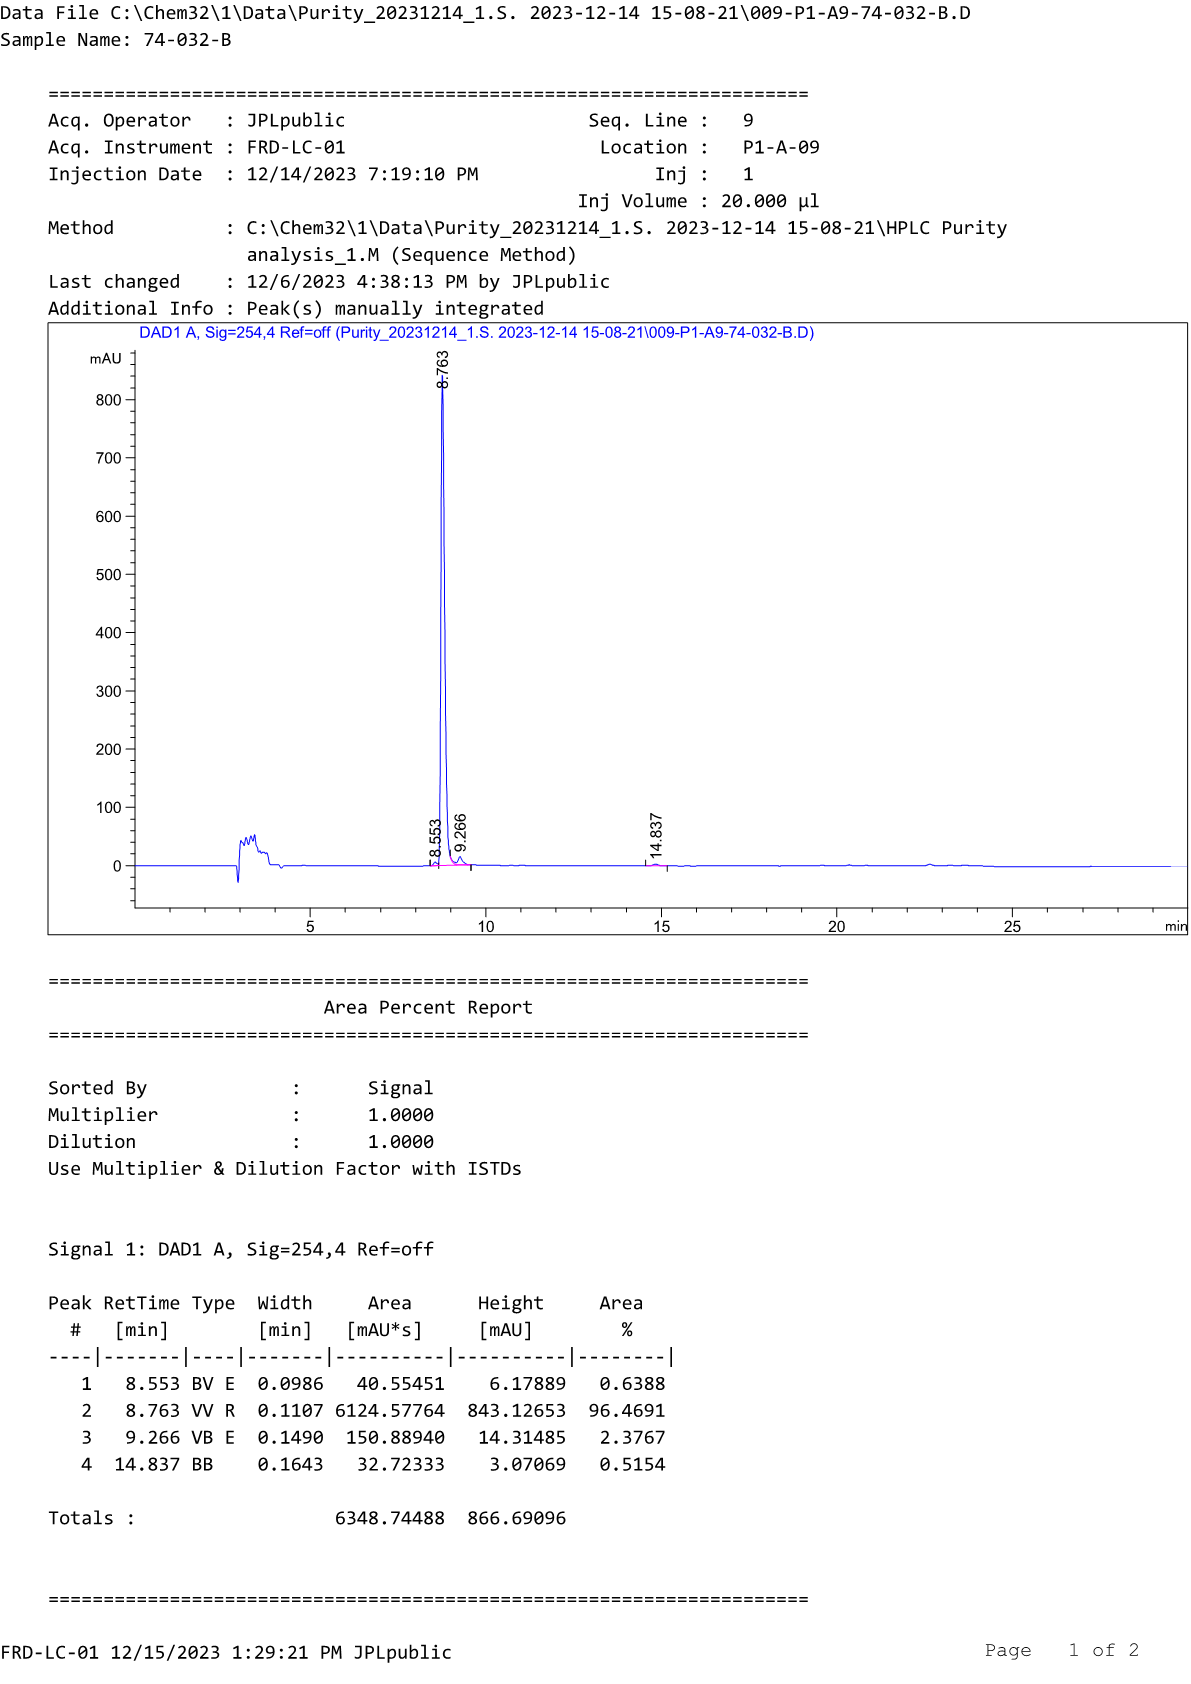


HPLC profile of compound **D3b**


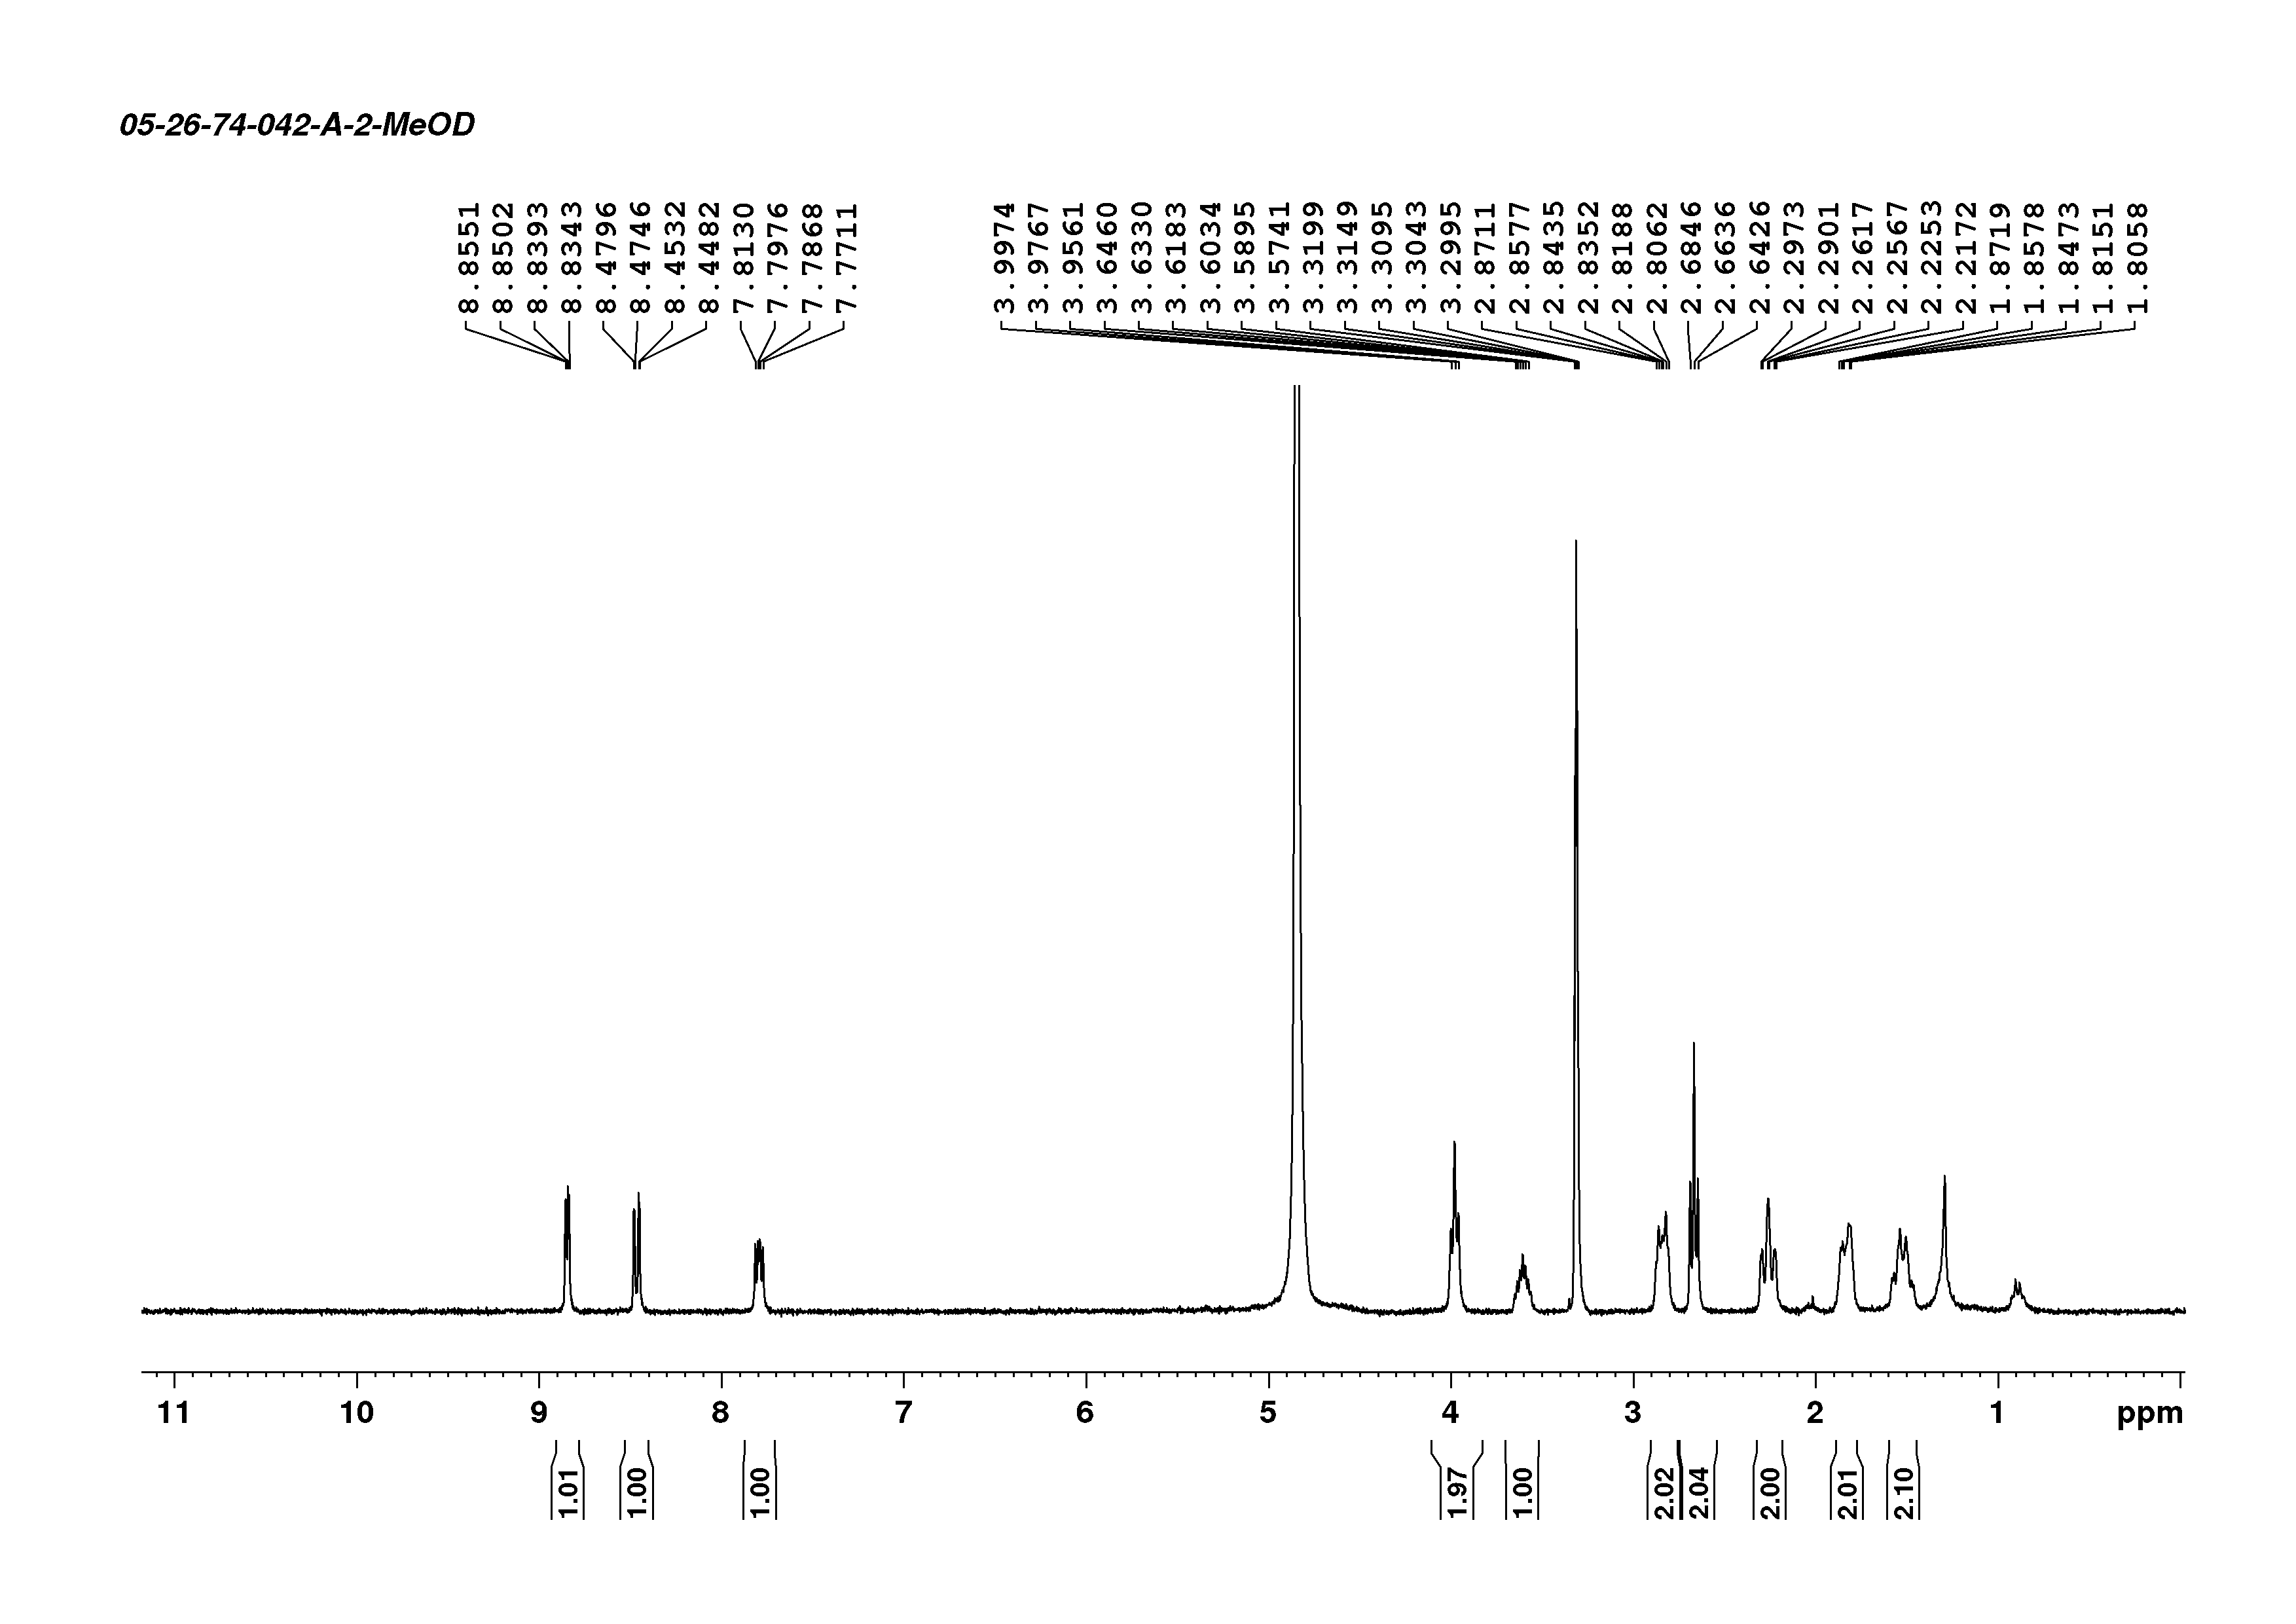


1H-NMR spectrum of compound **D4a**


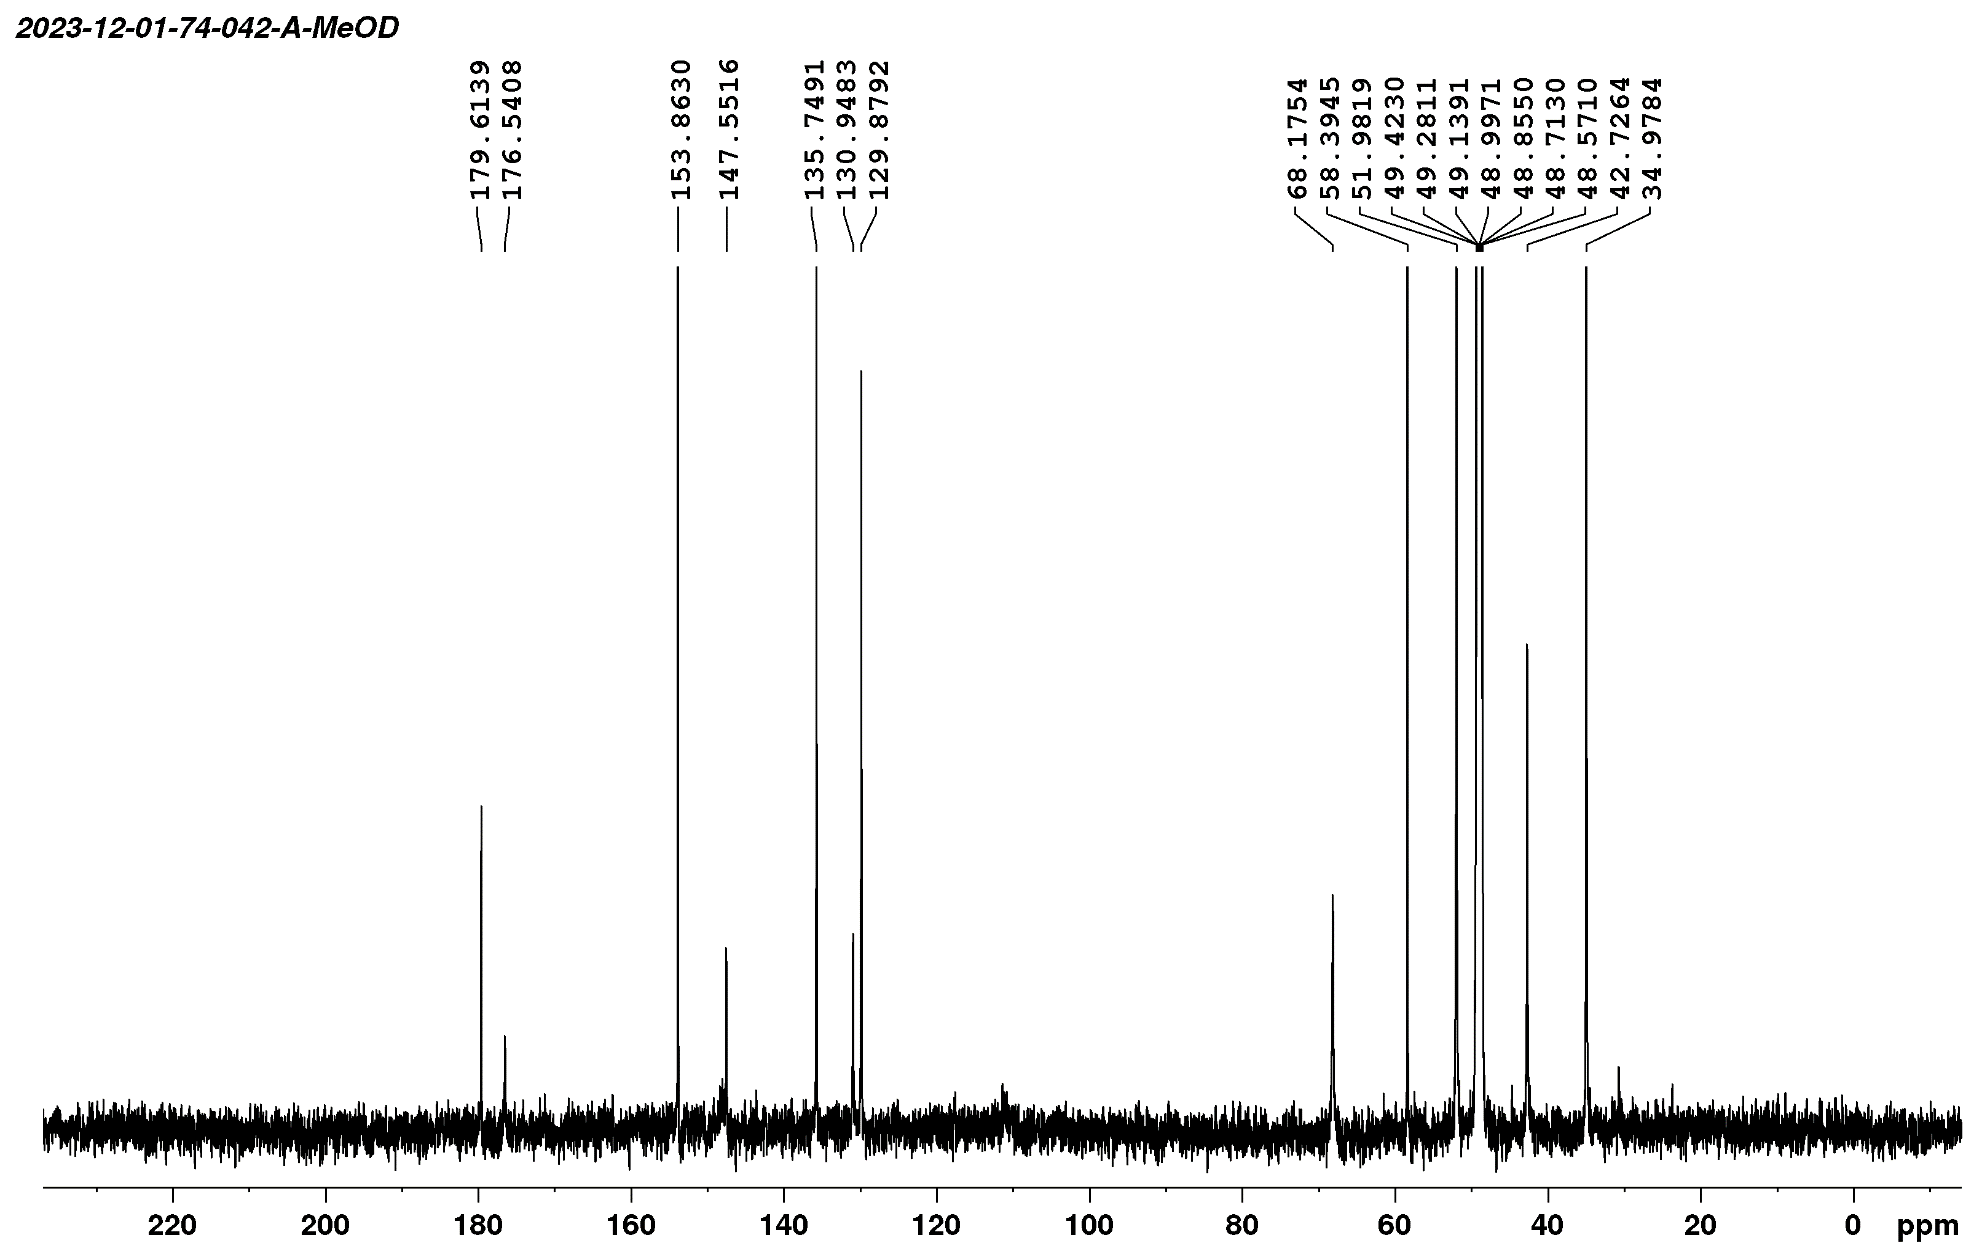


13C-NMR spectrum of compound **D4a**

**
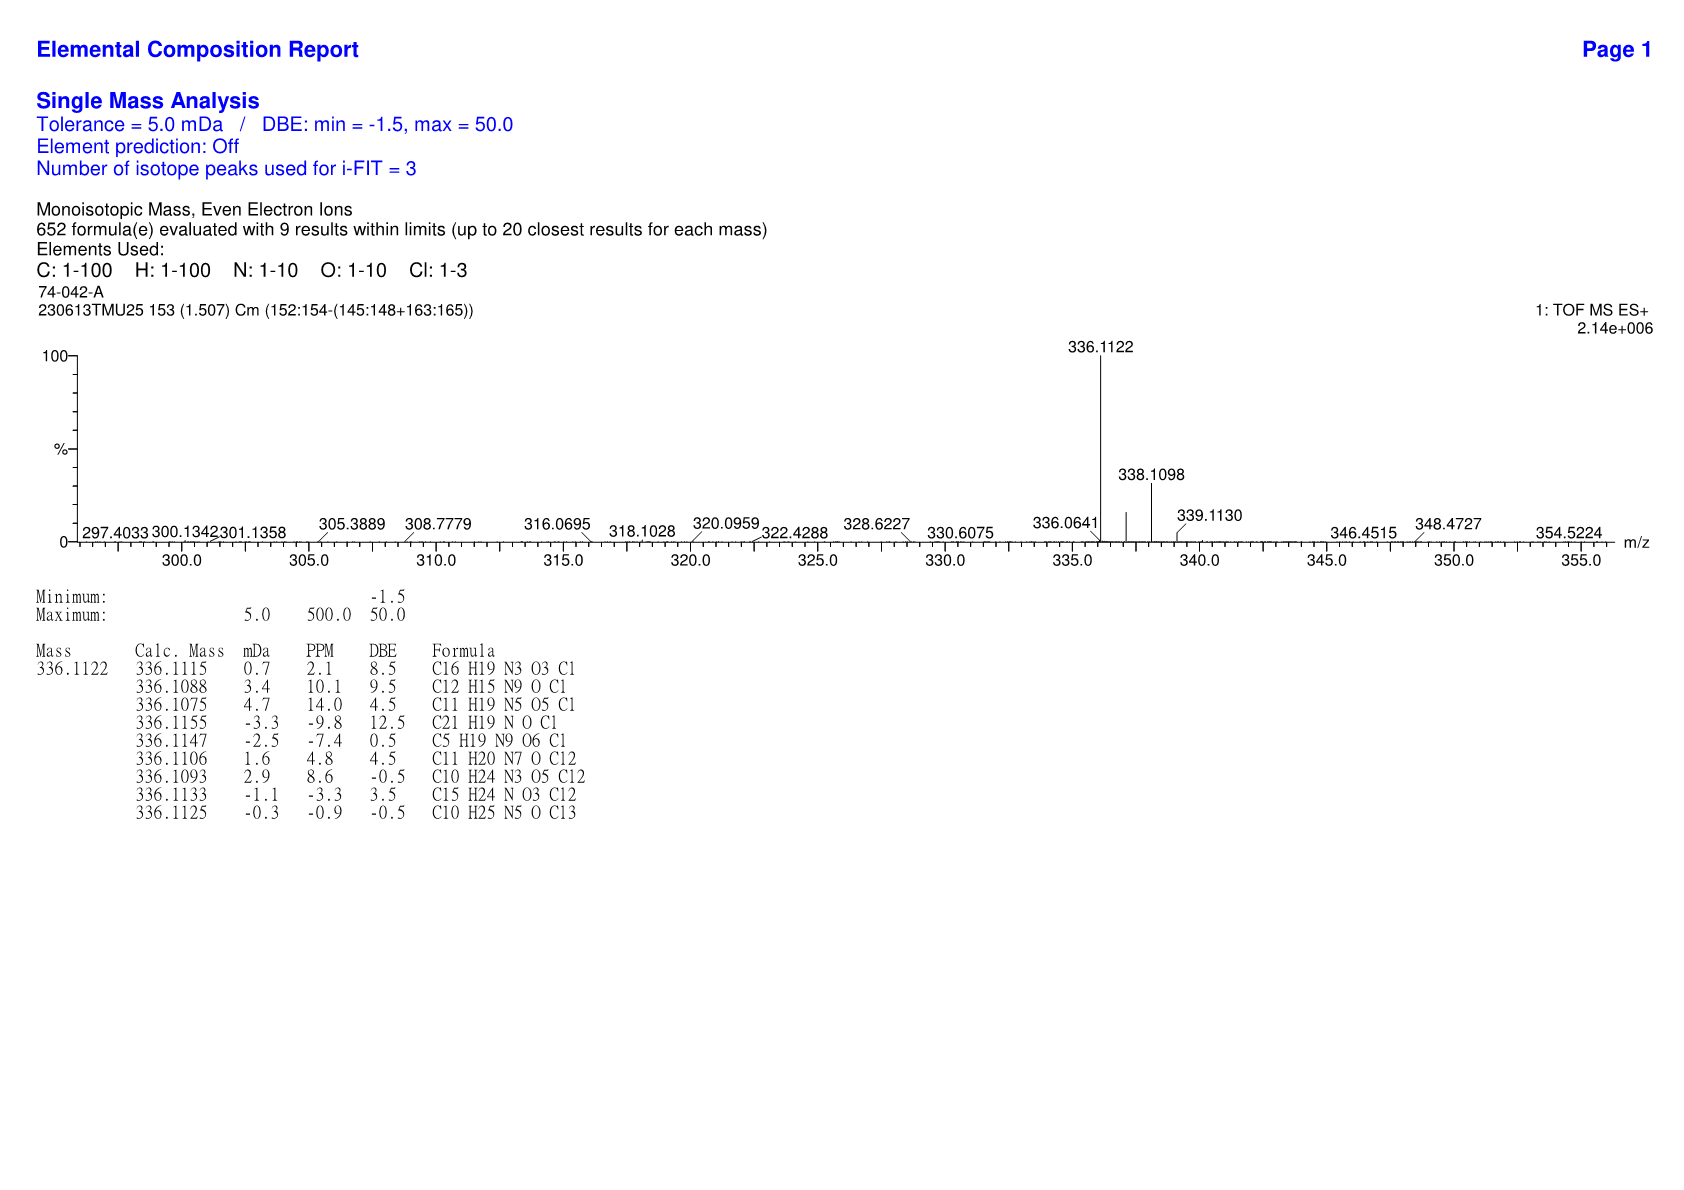
**

HRMS spectrum of compound **D4a**

**
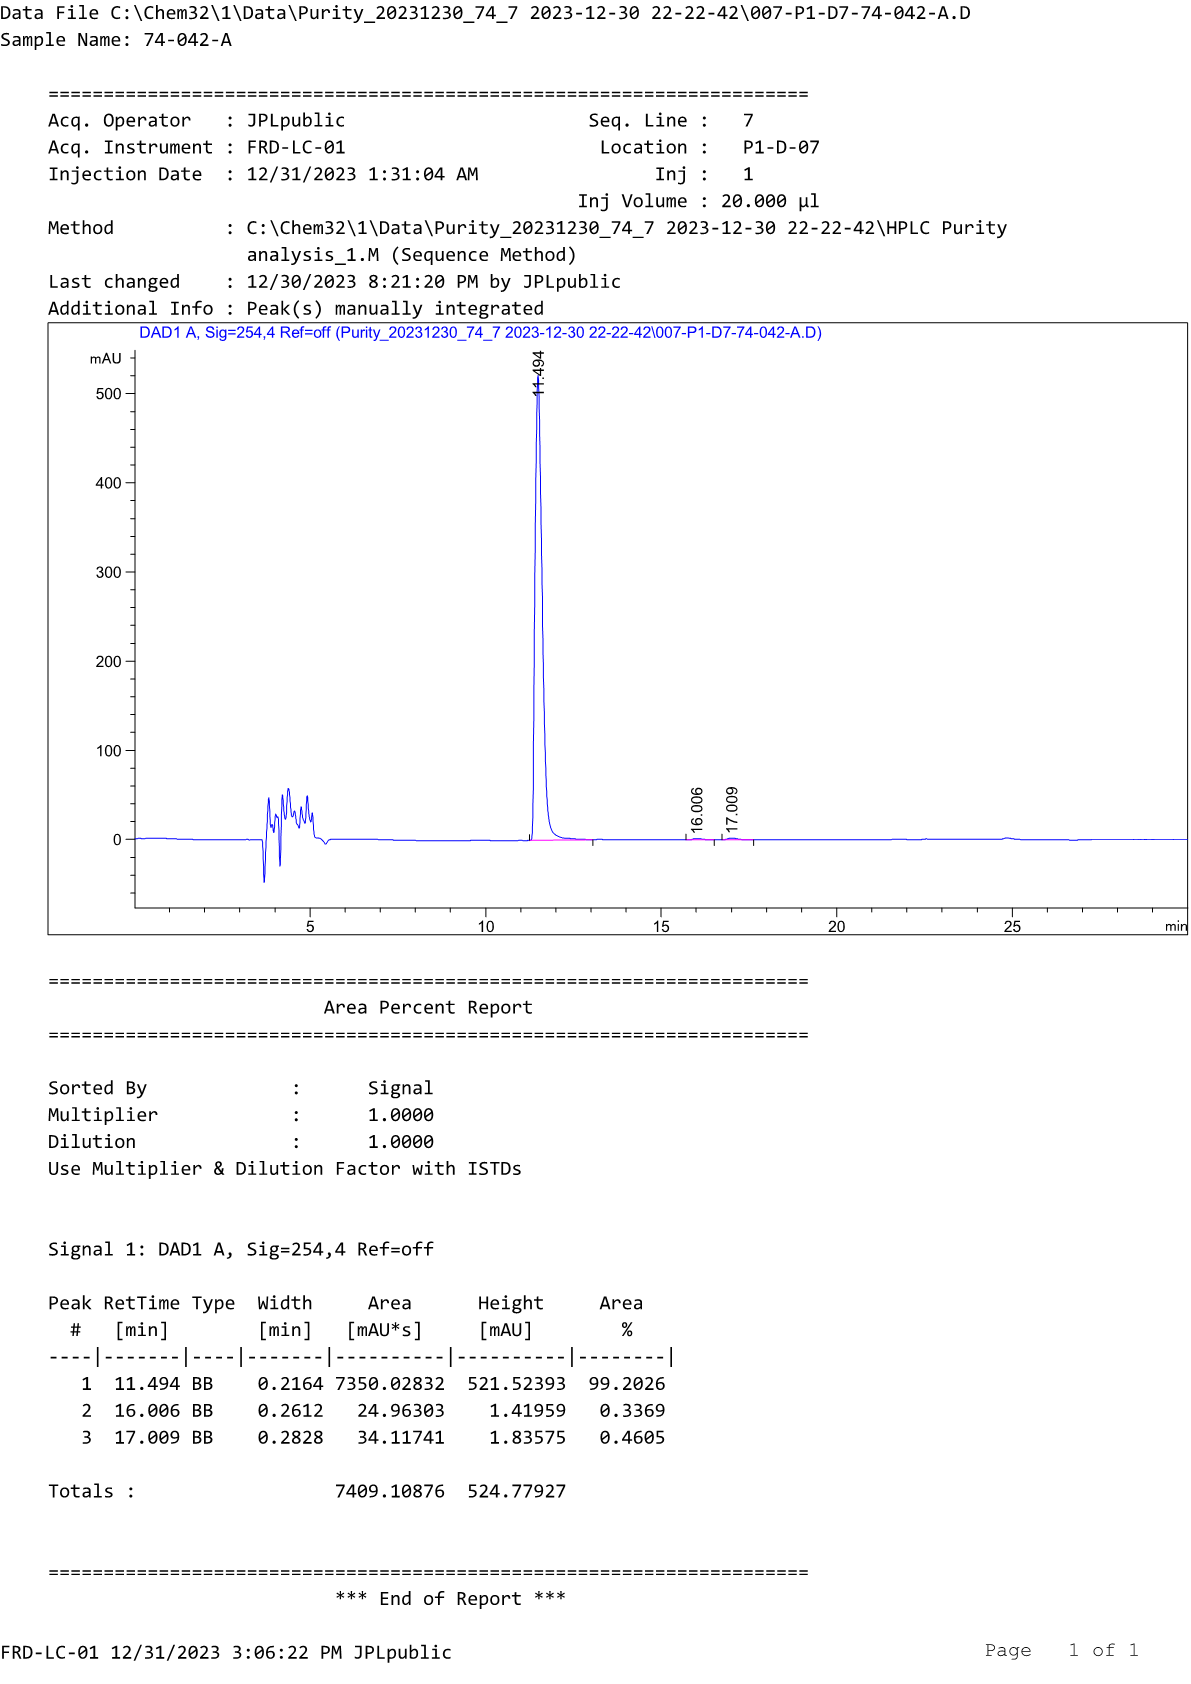
**

**
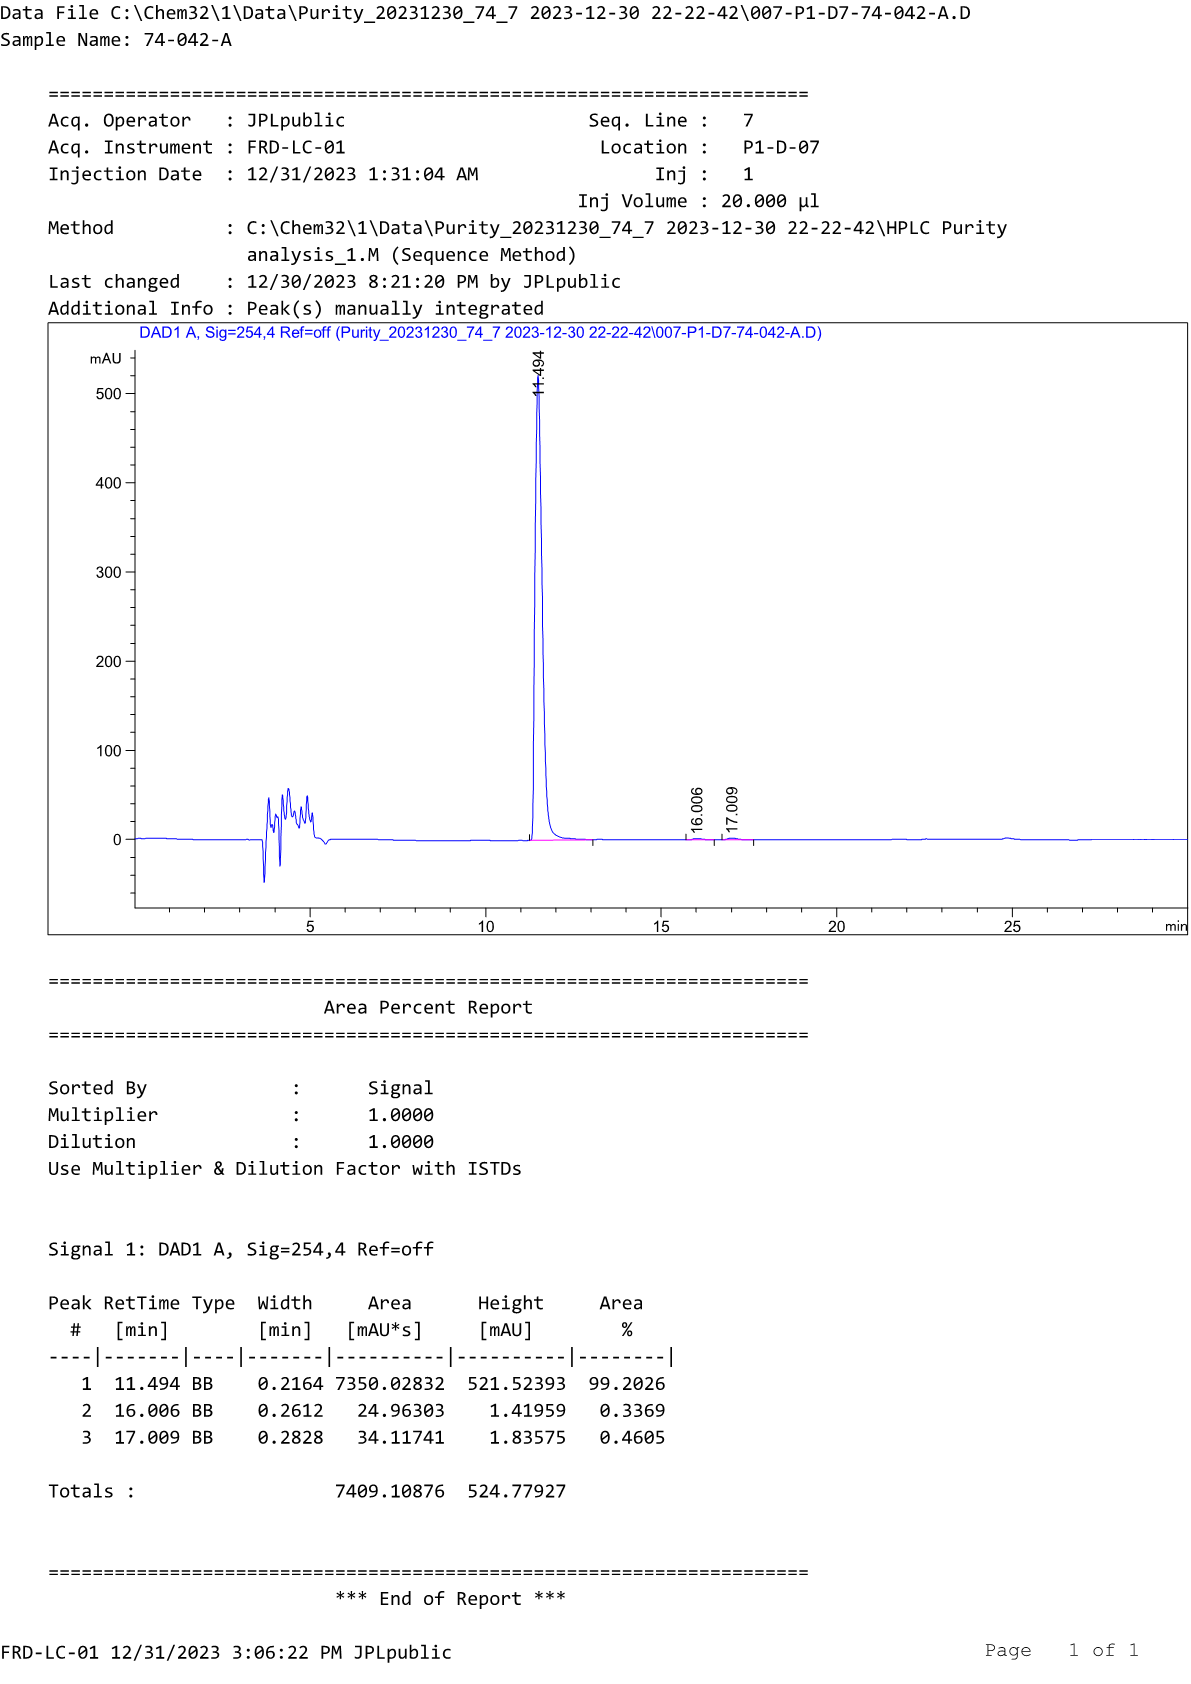
**

HPLC profile of compound **D4a**


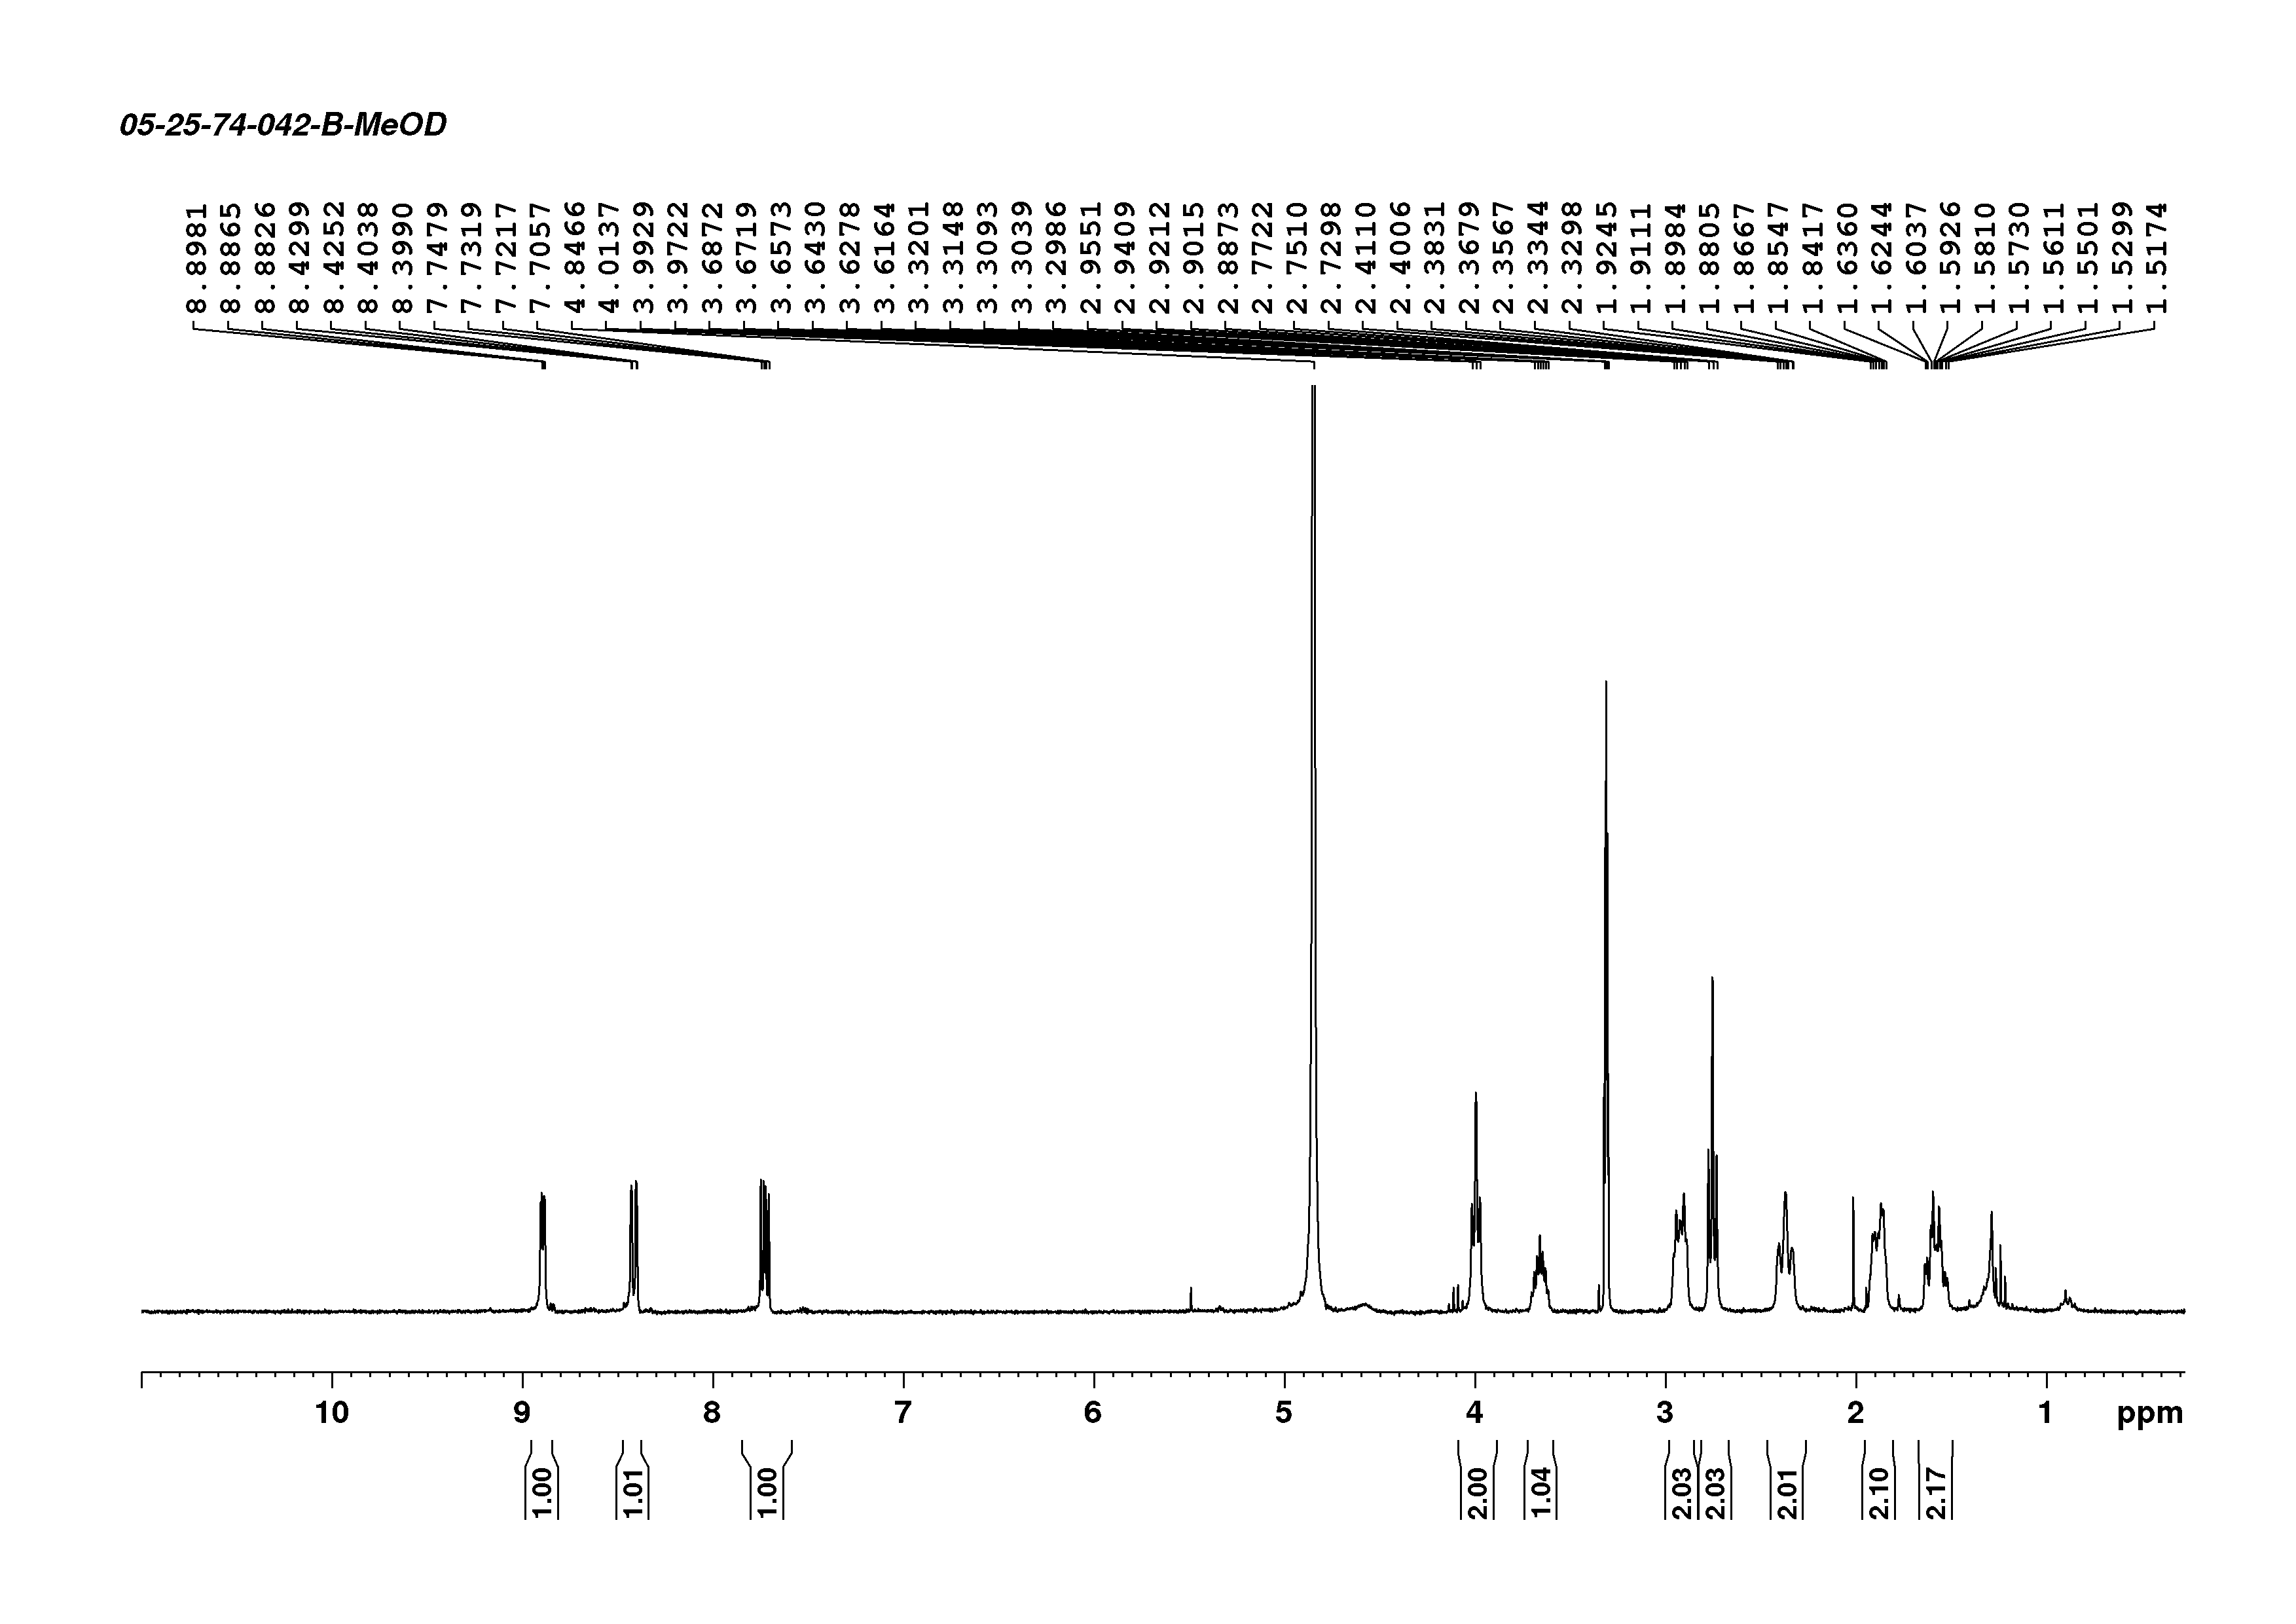


1H-NMR spectrum of compound **D4b**


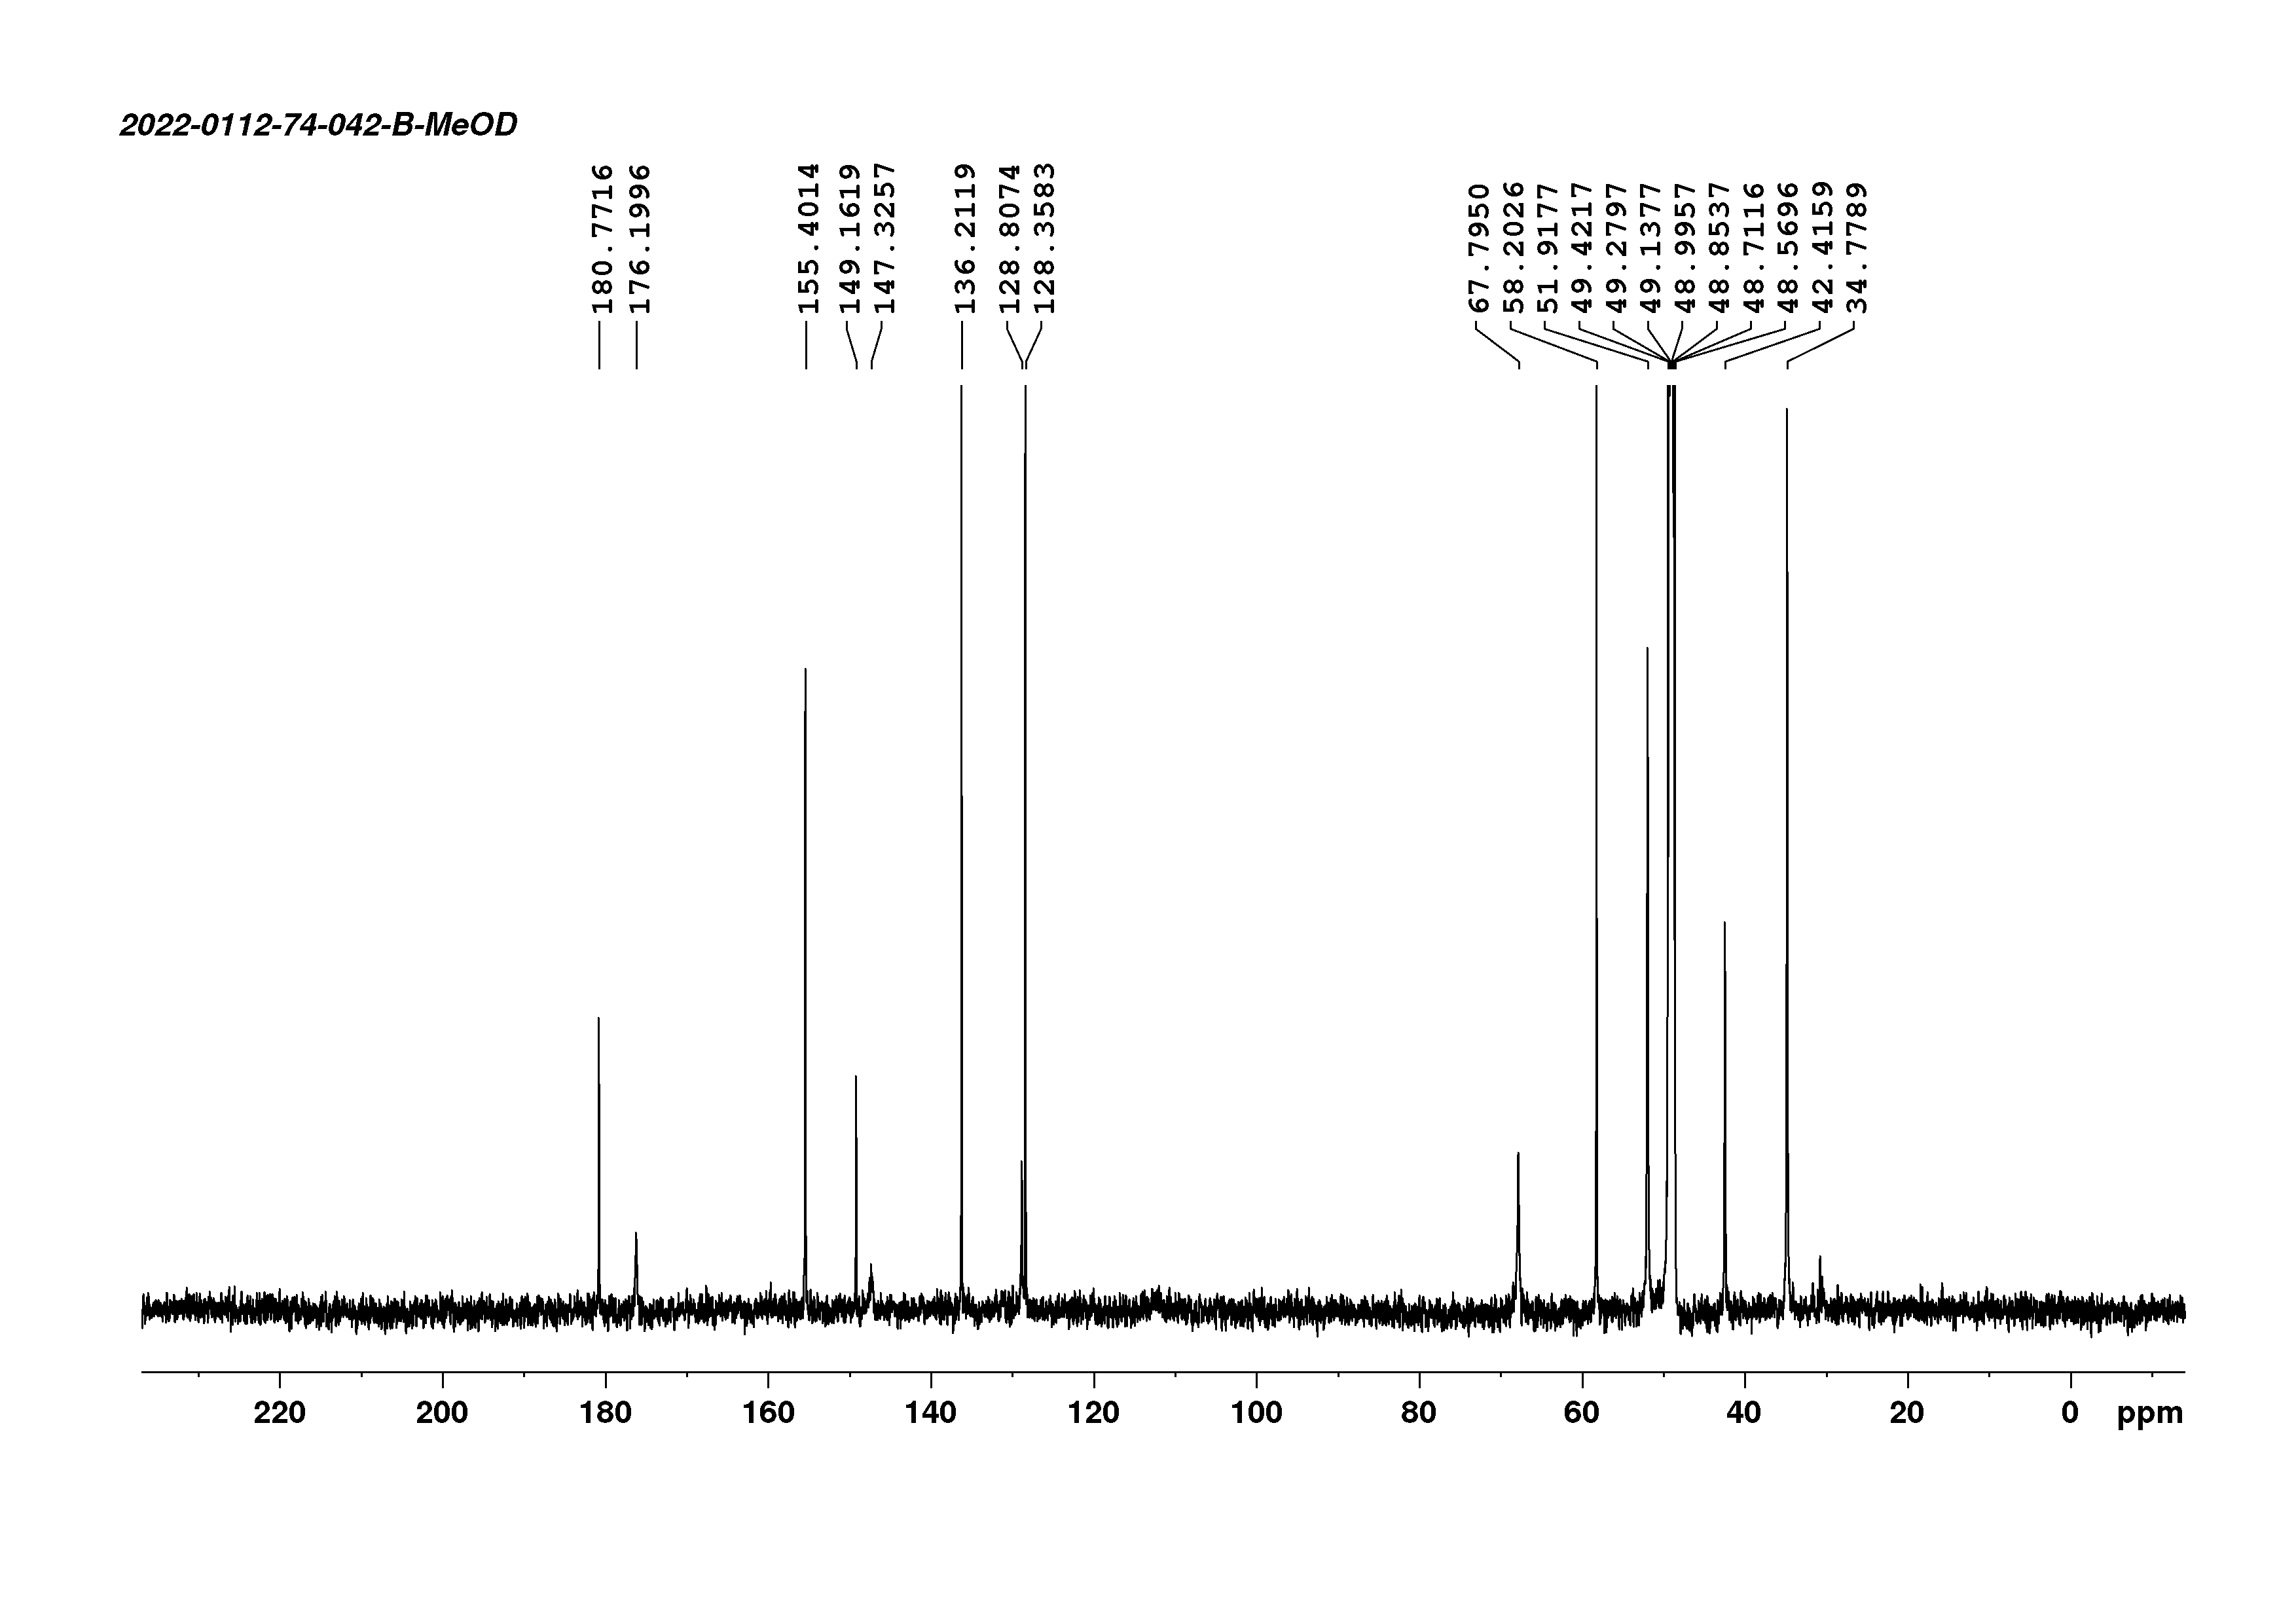


13C-NMR spectrum of compound **D4b**

**
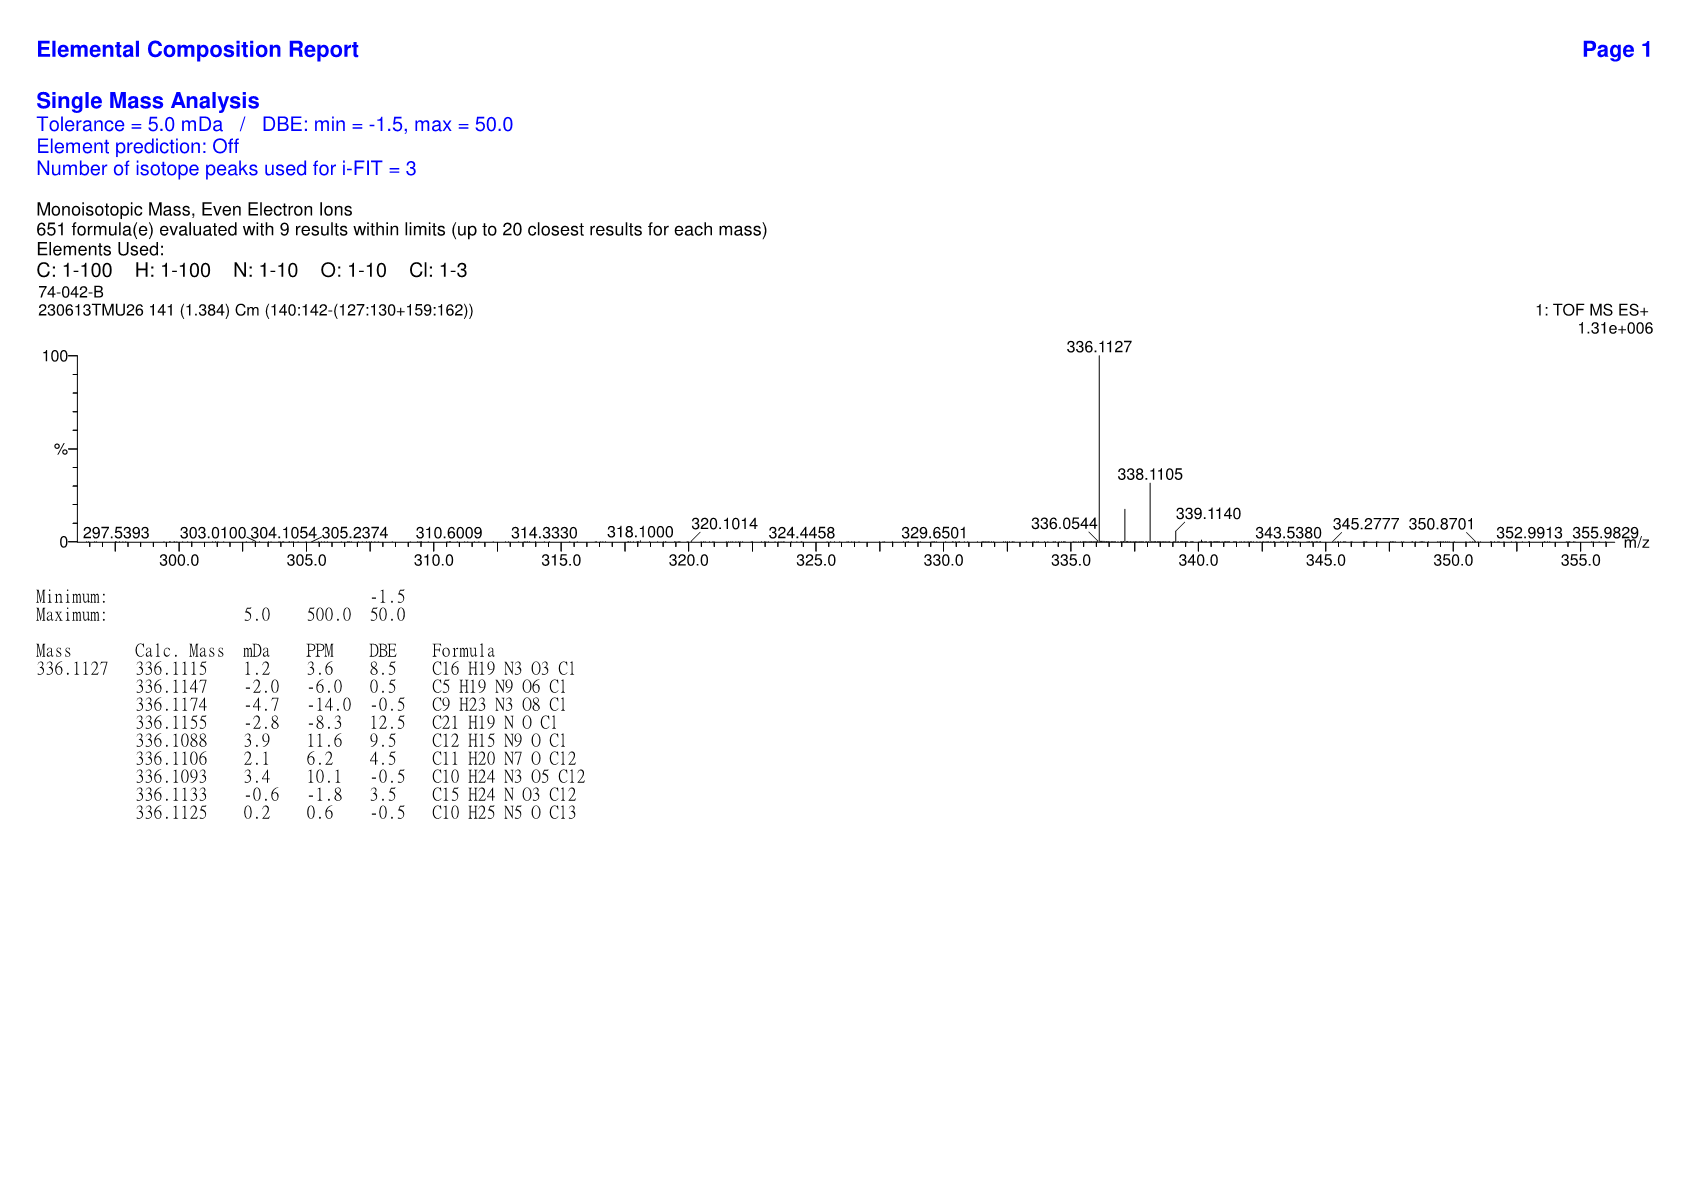
**

HRMS spectrum of compound **D4b**


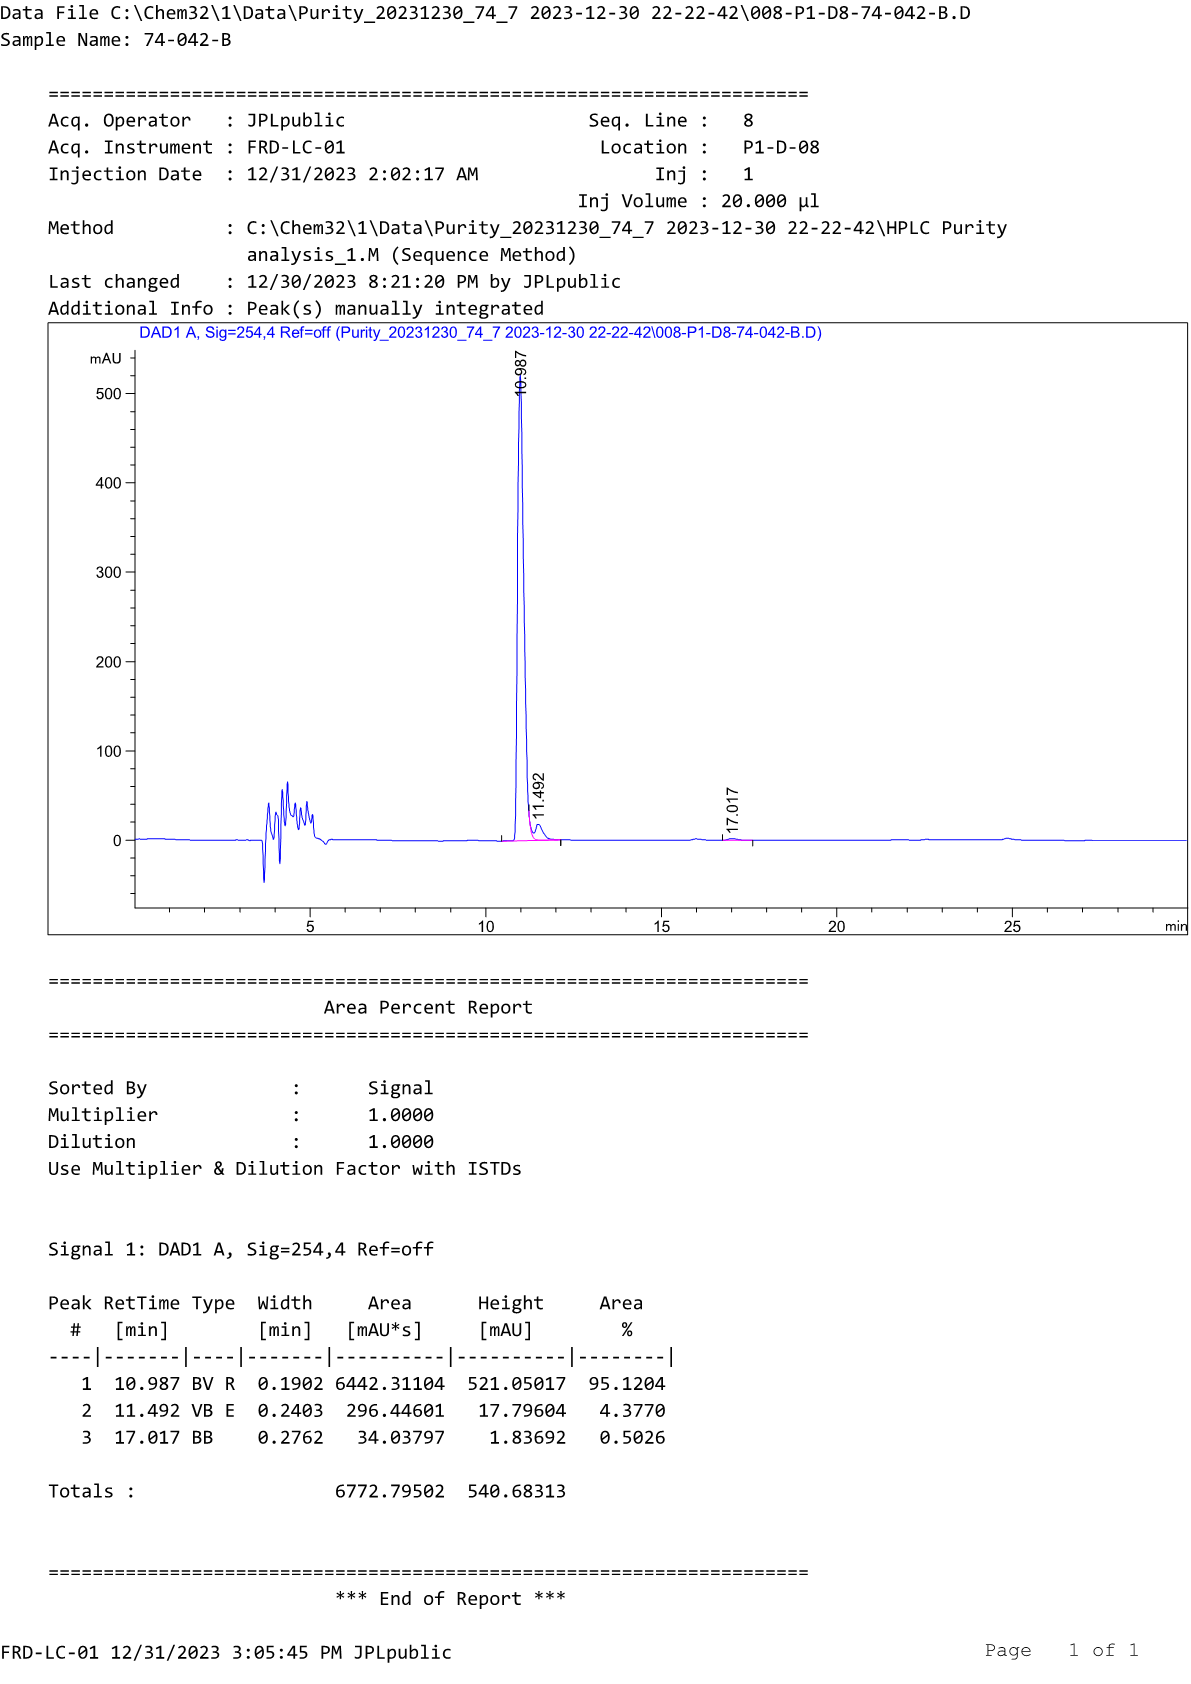


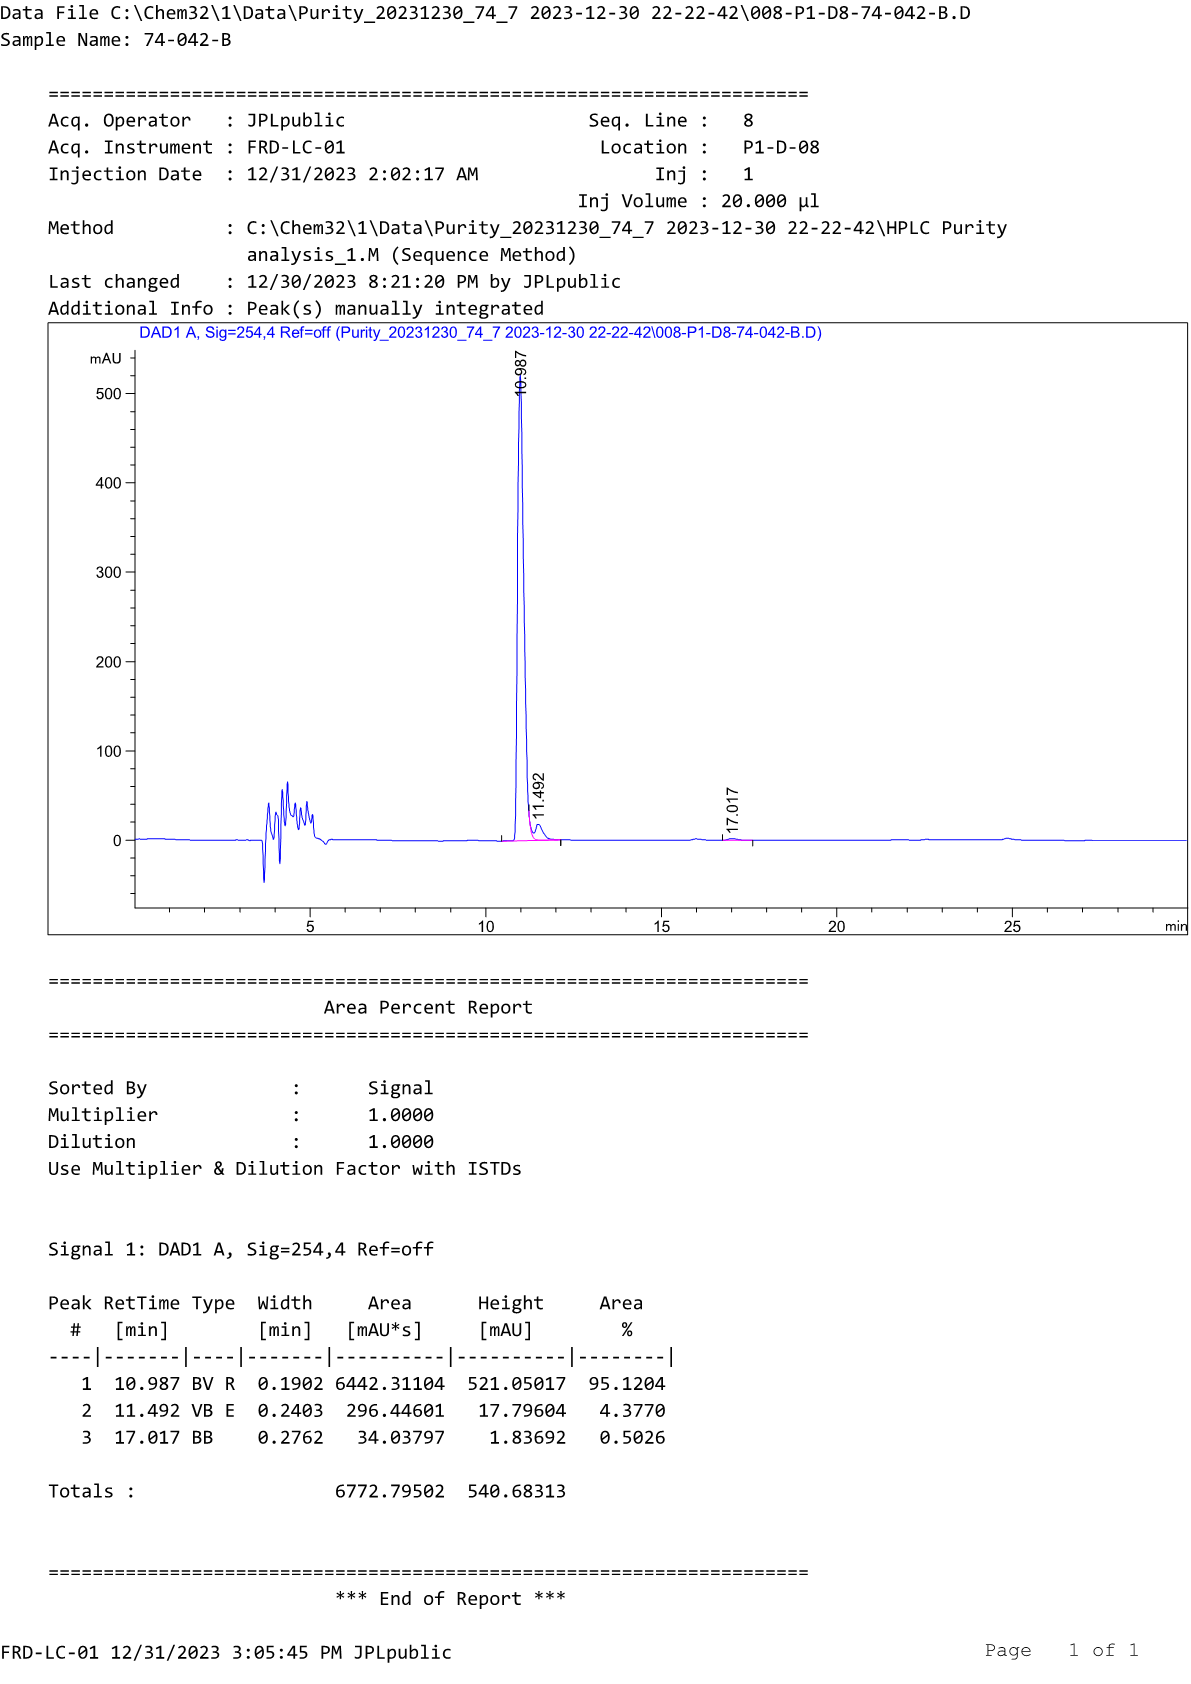


HPLC profile of compound **D4b**


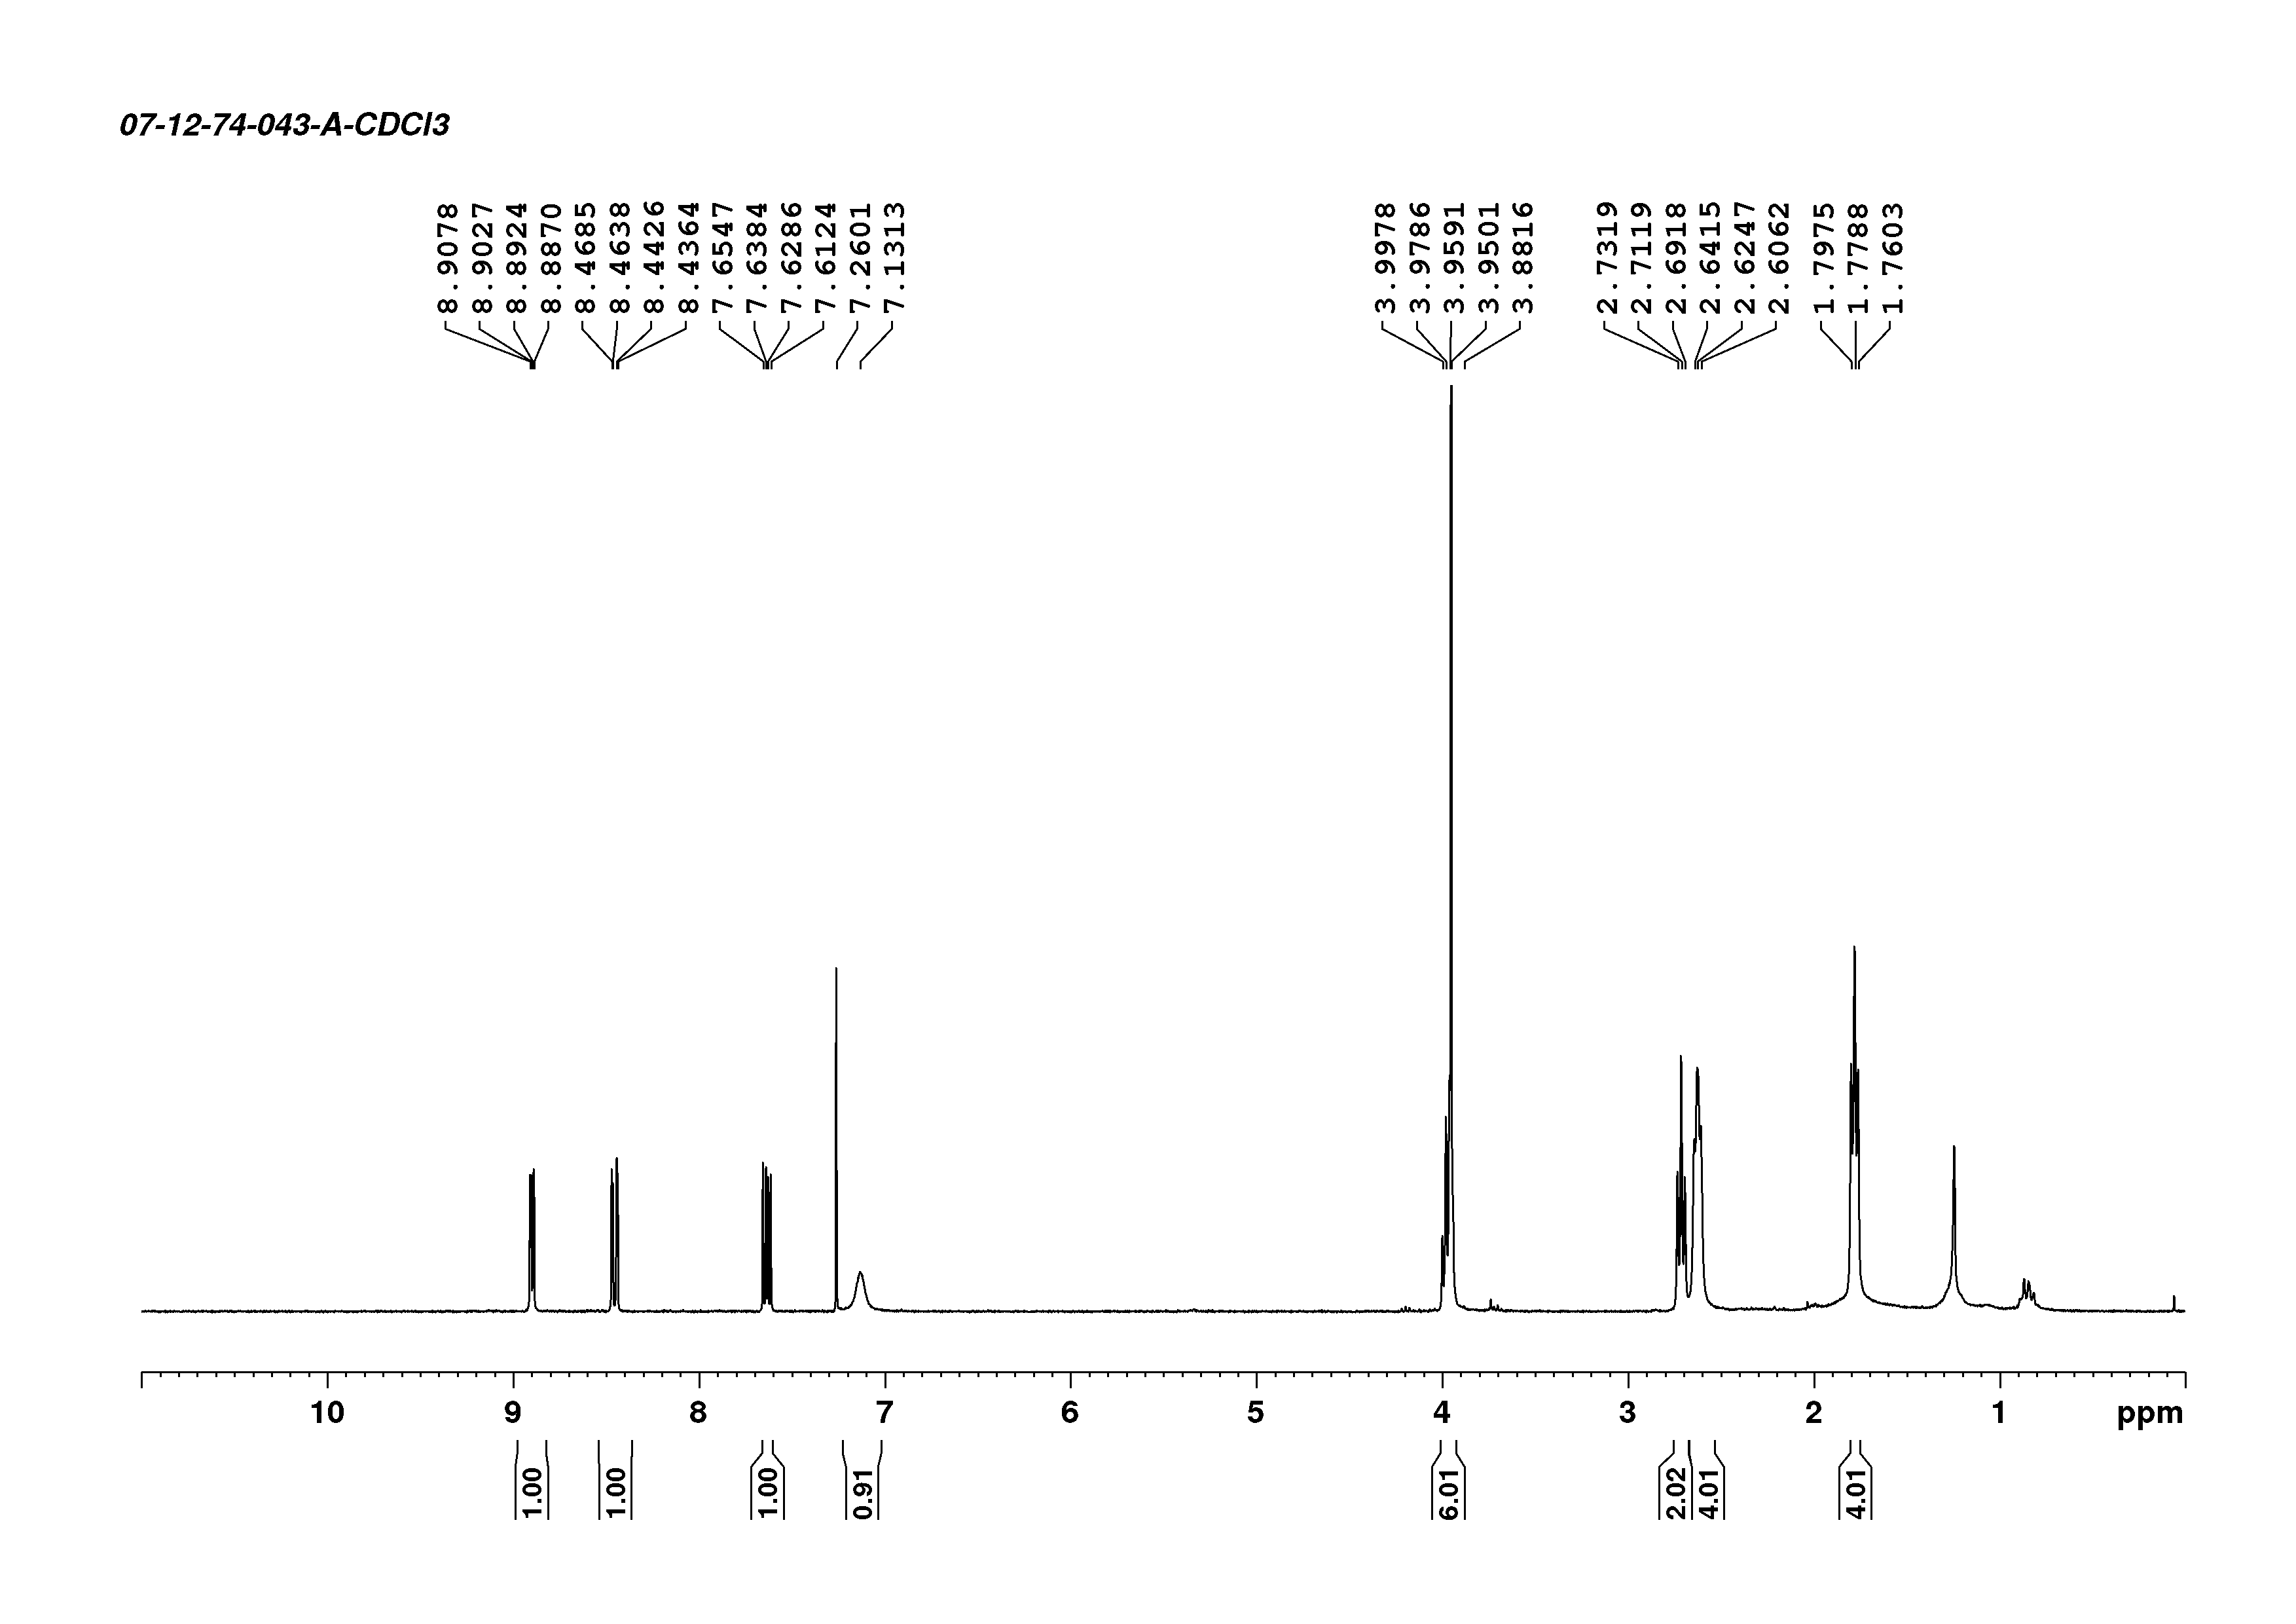


1H-NMR spectrum of compound **D5a**


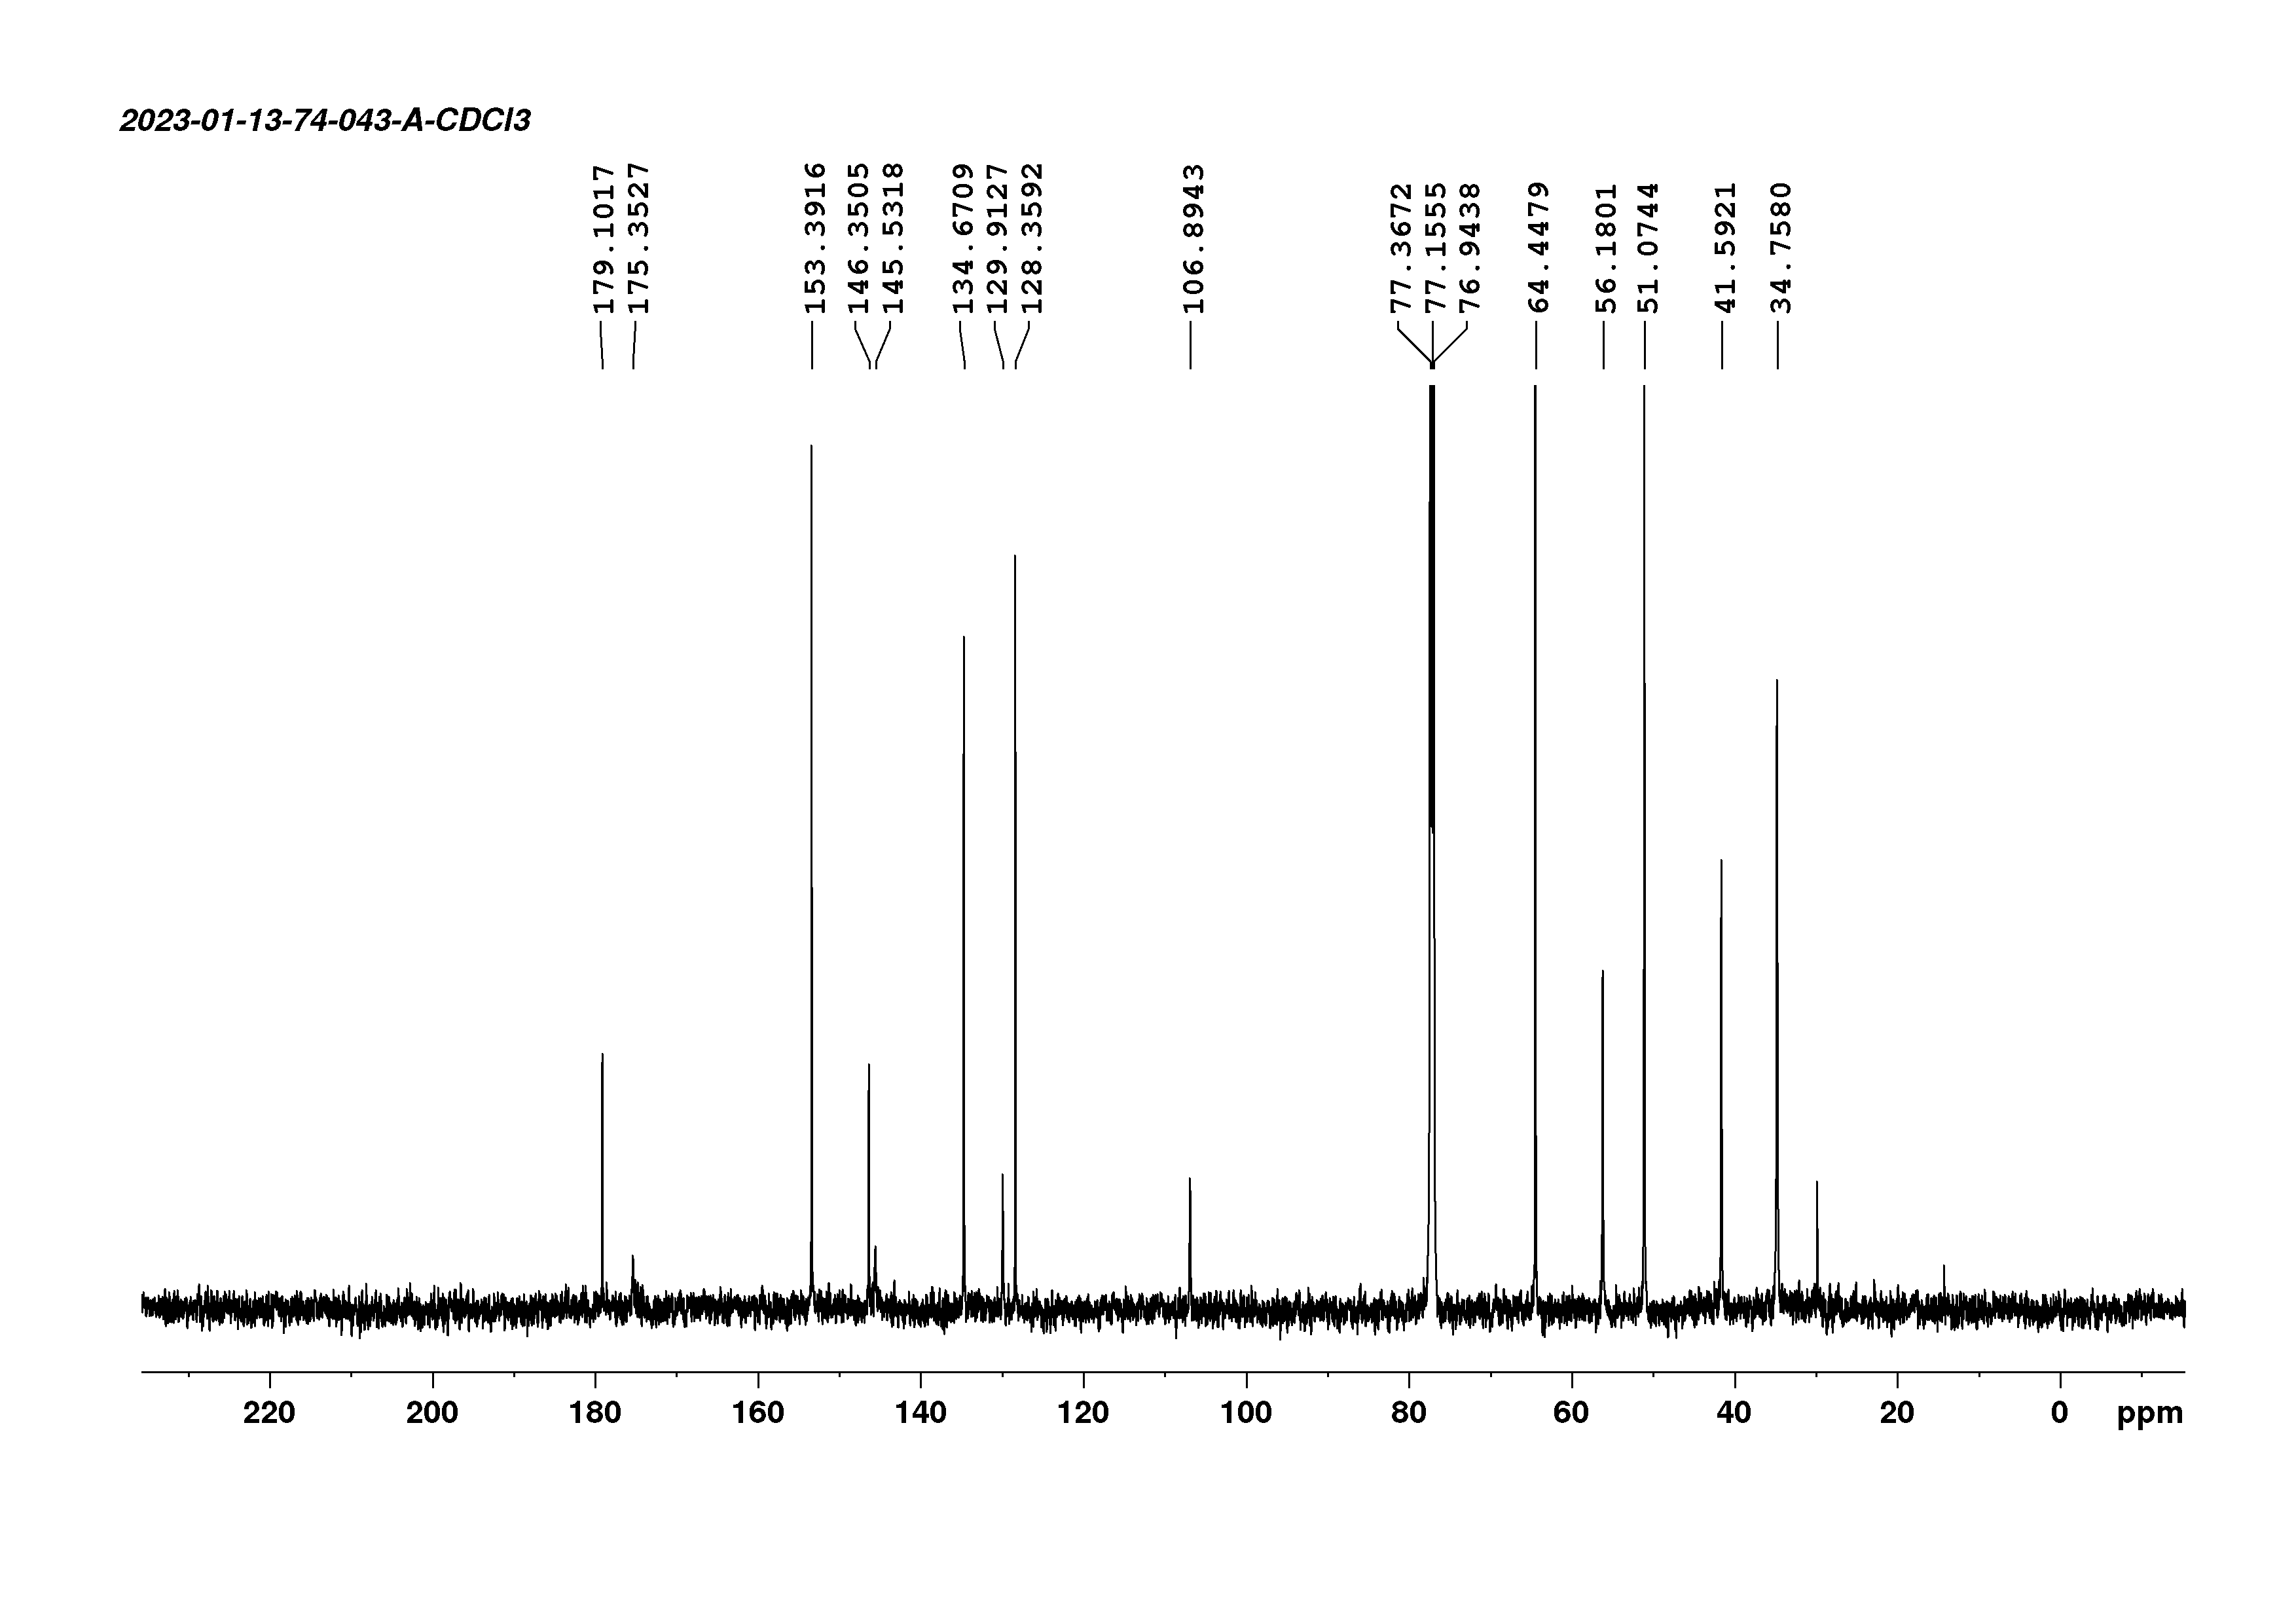


13C-NMR spectrum of compound **D5a**

**
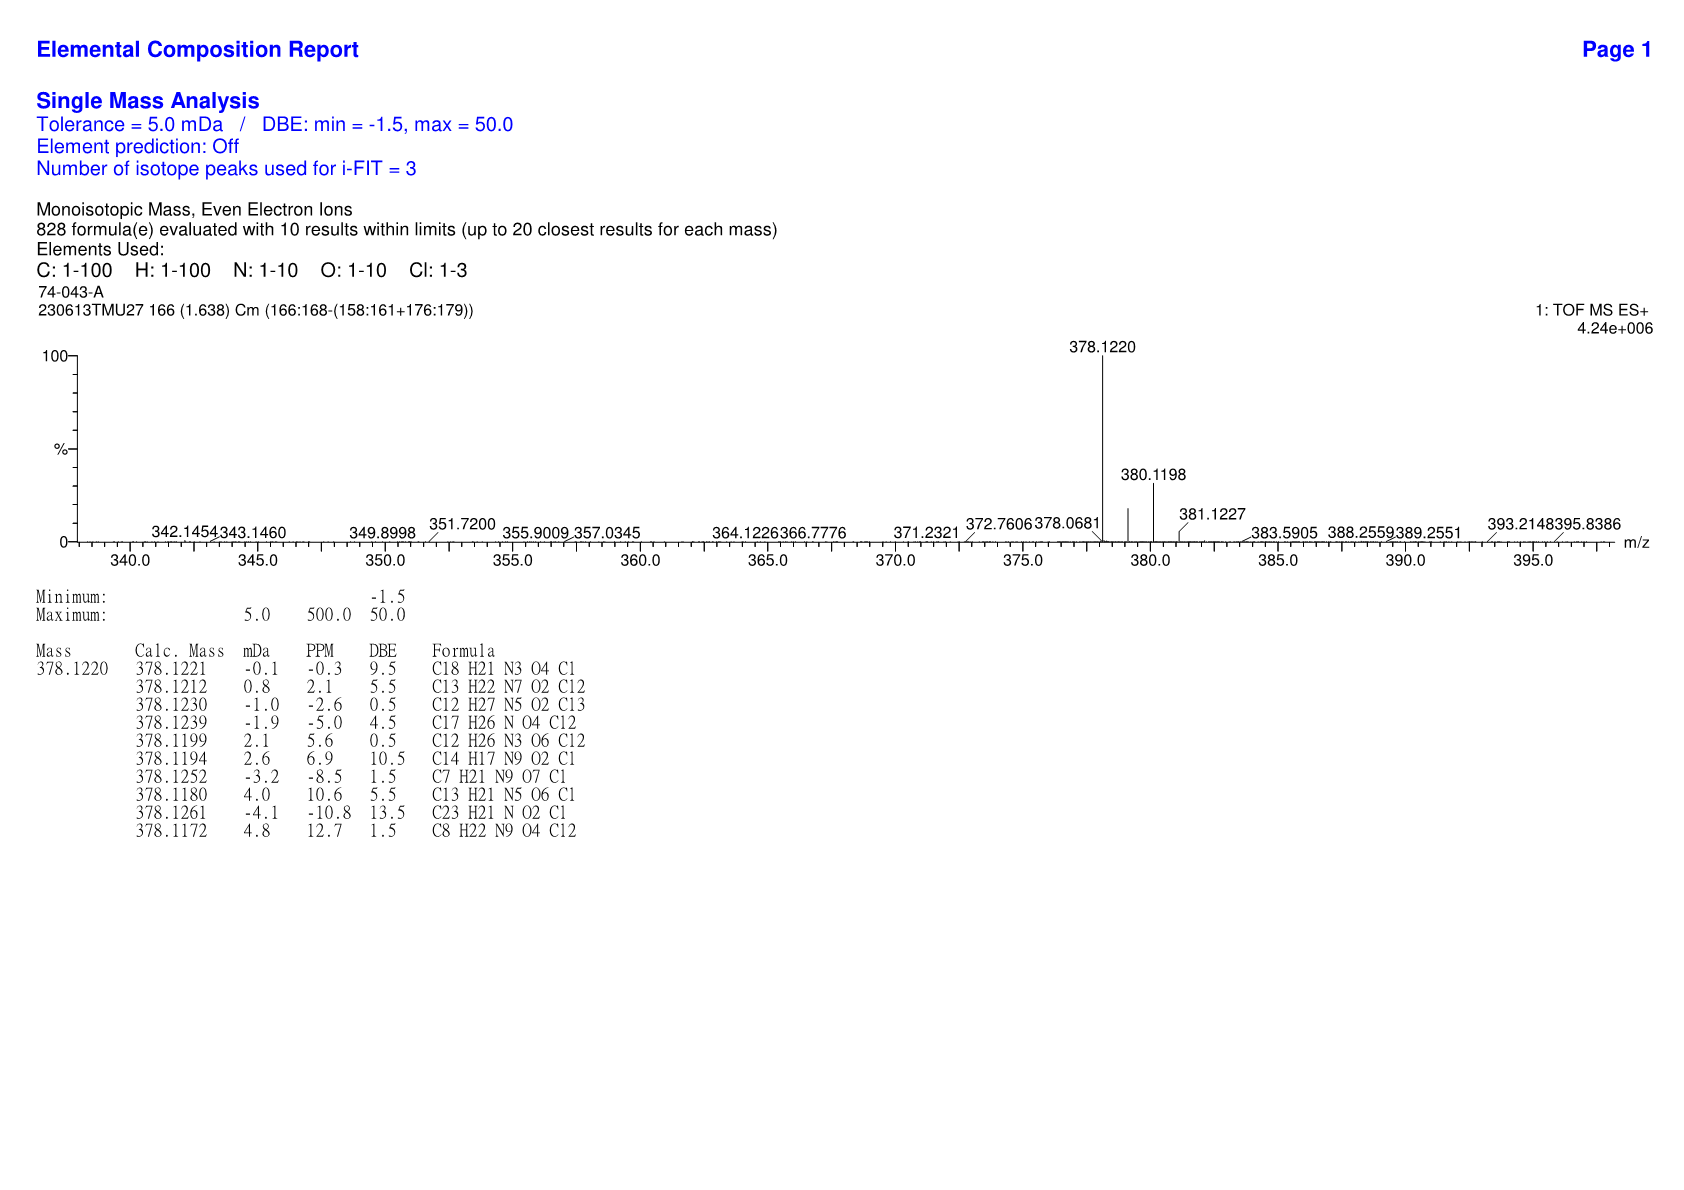
**

HRMS spectrum of compound **D5a**


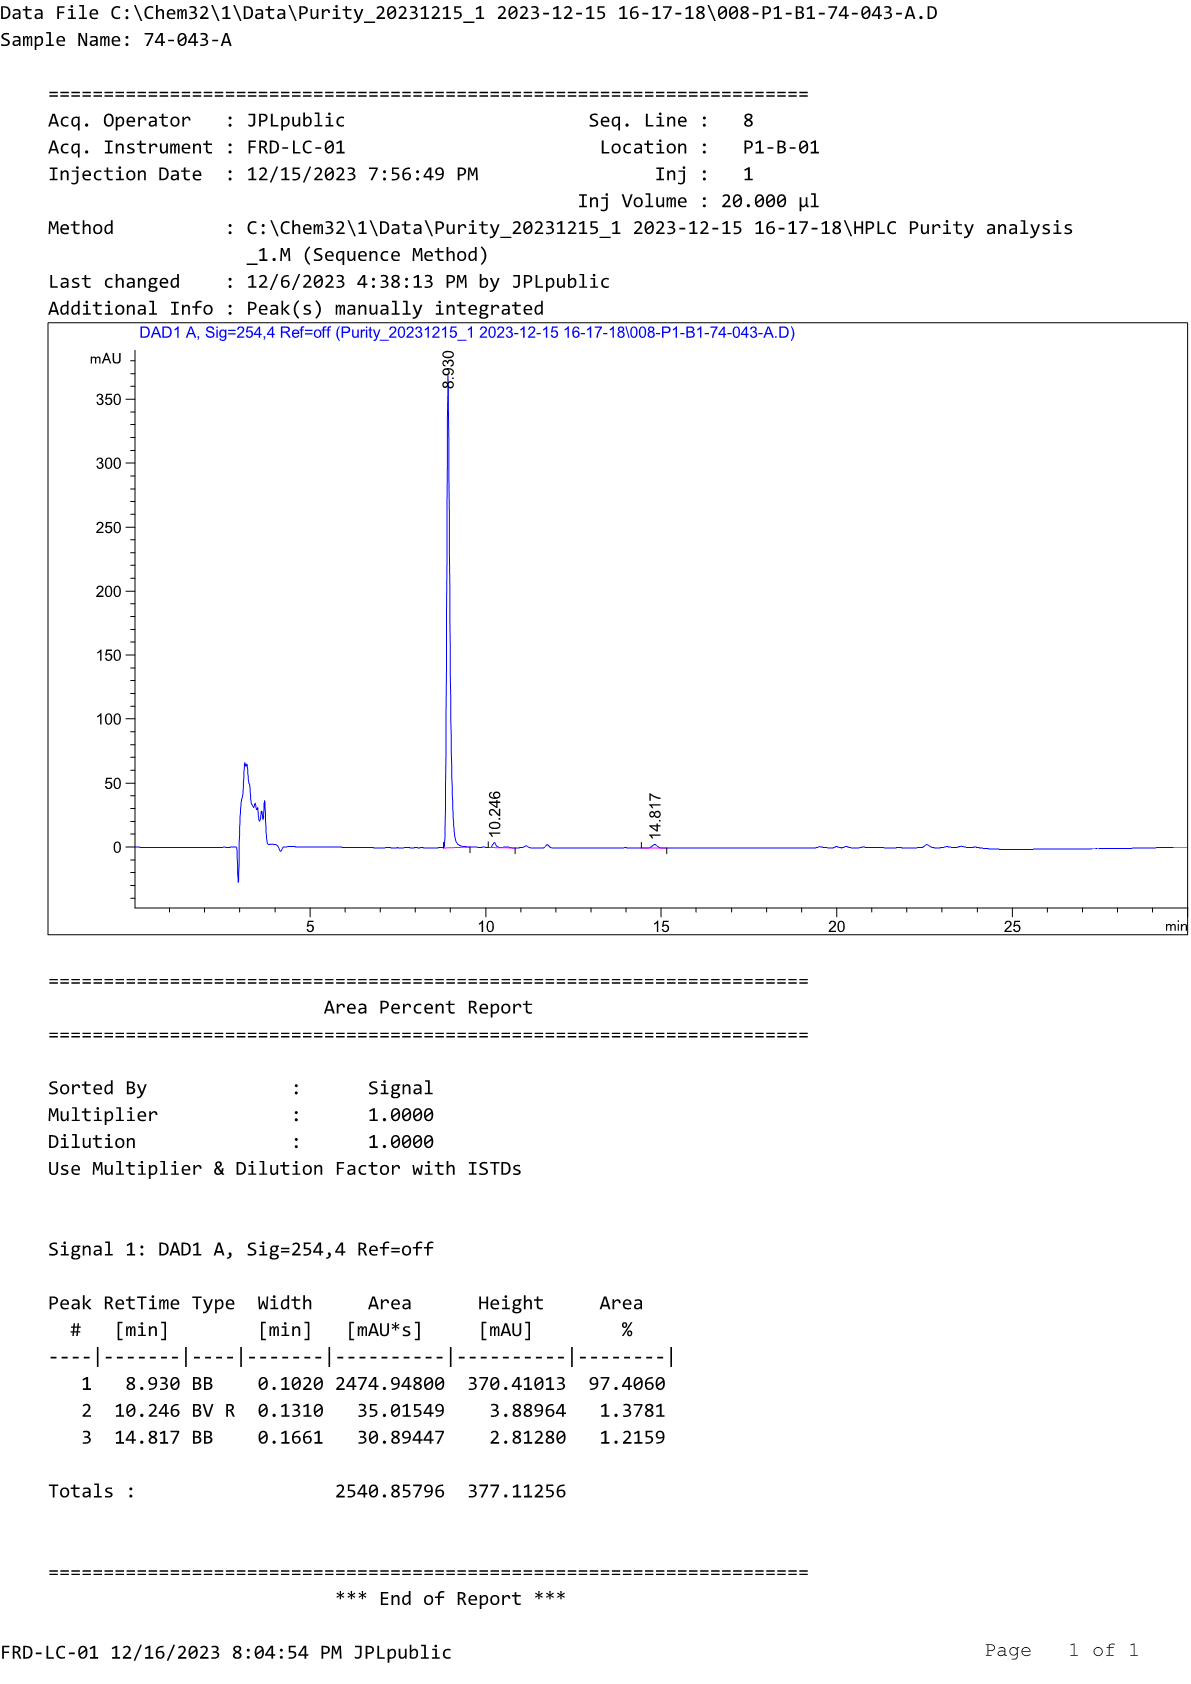


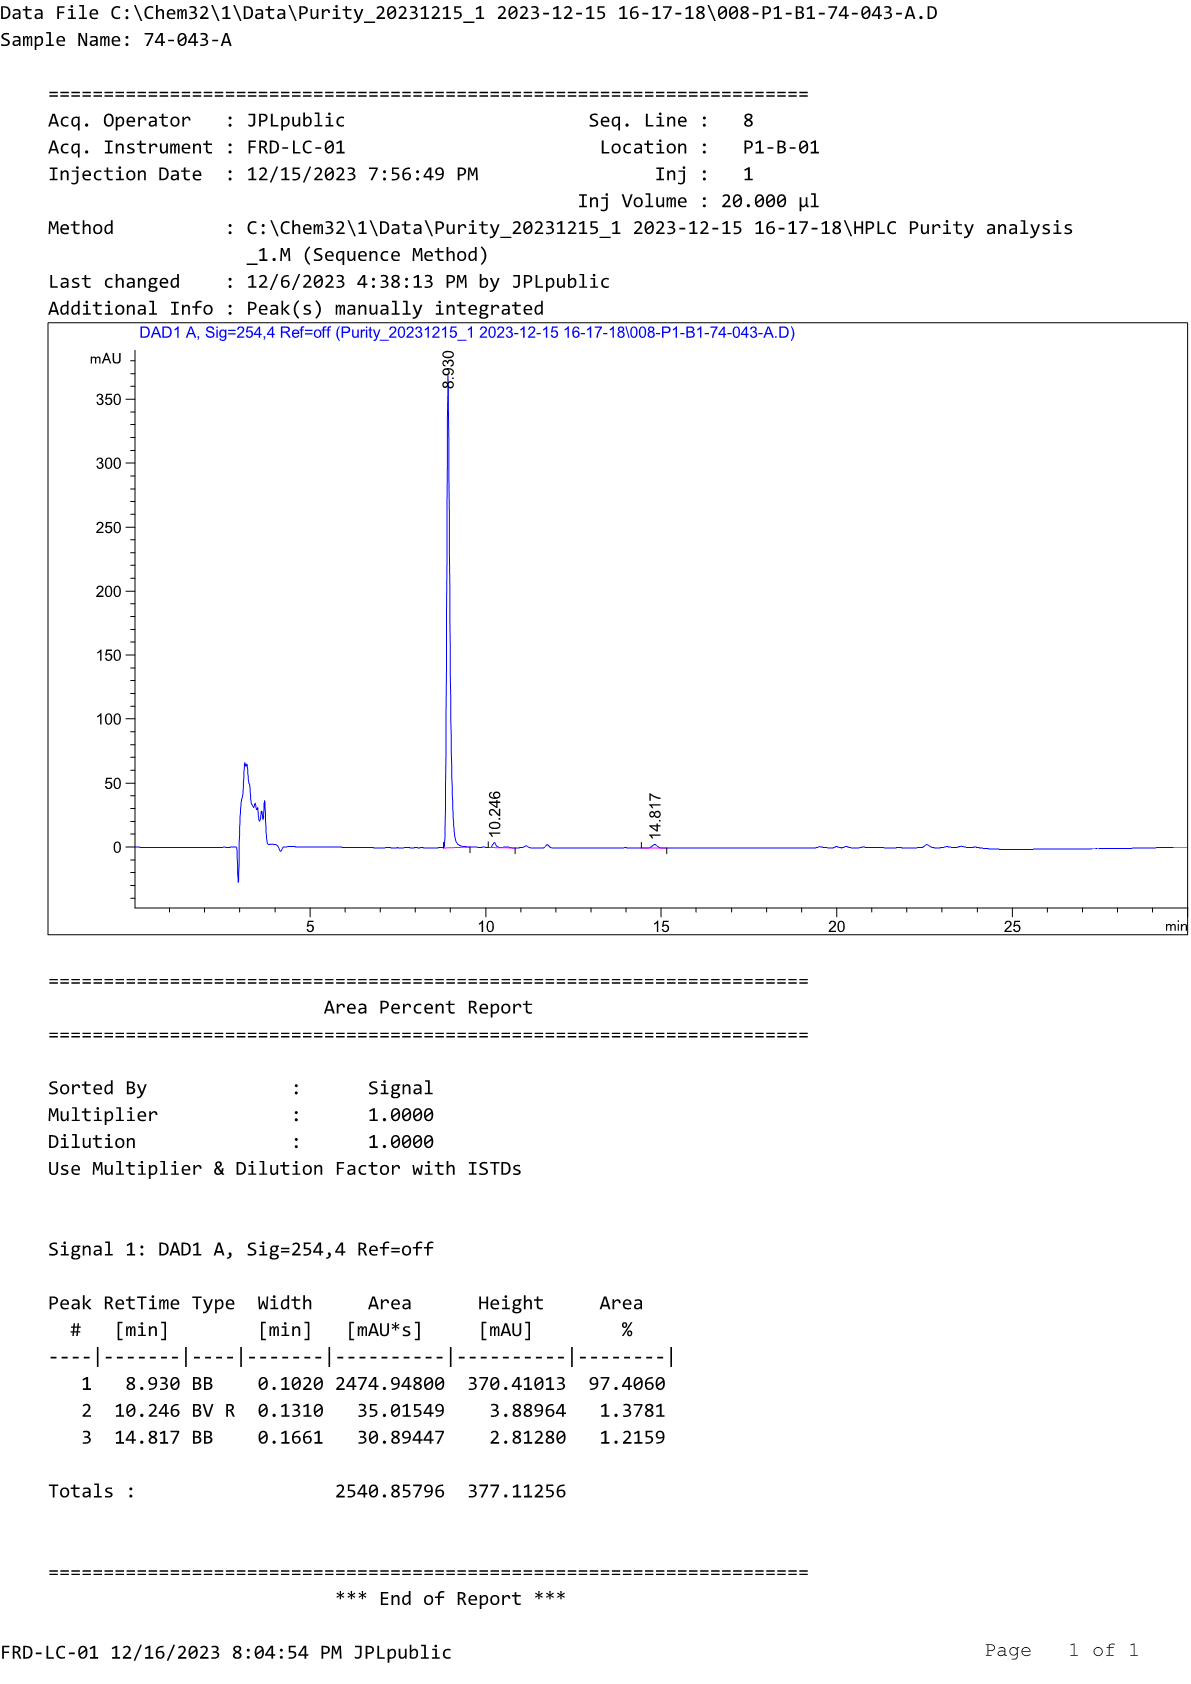


HPLC profile of compound **D5a**


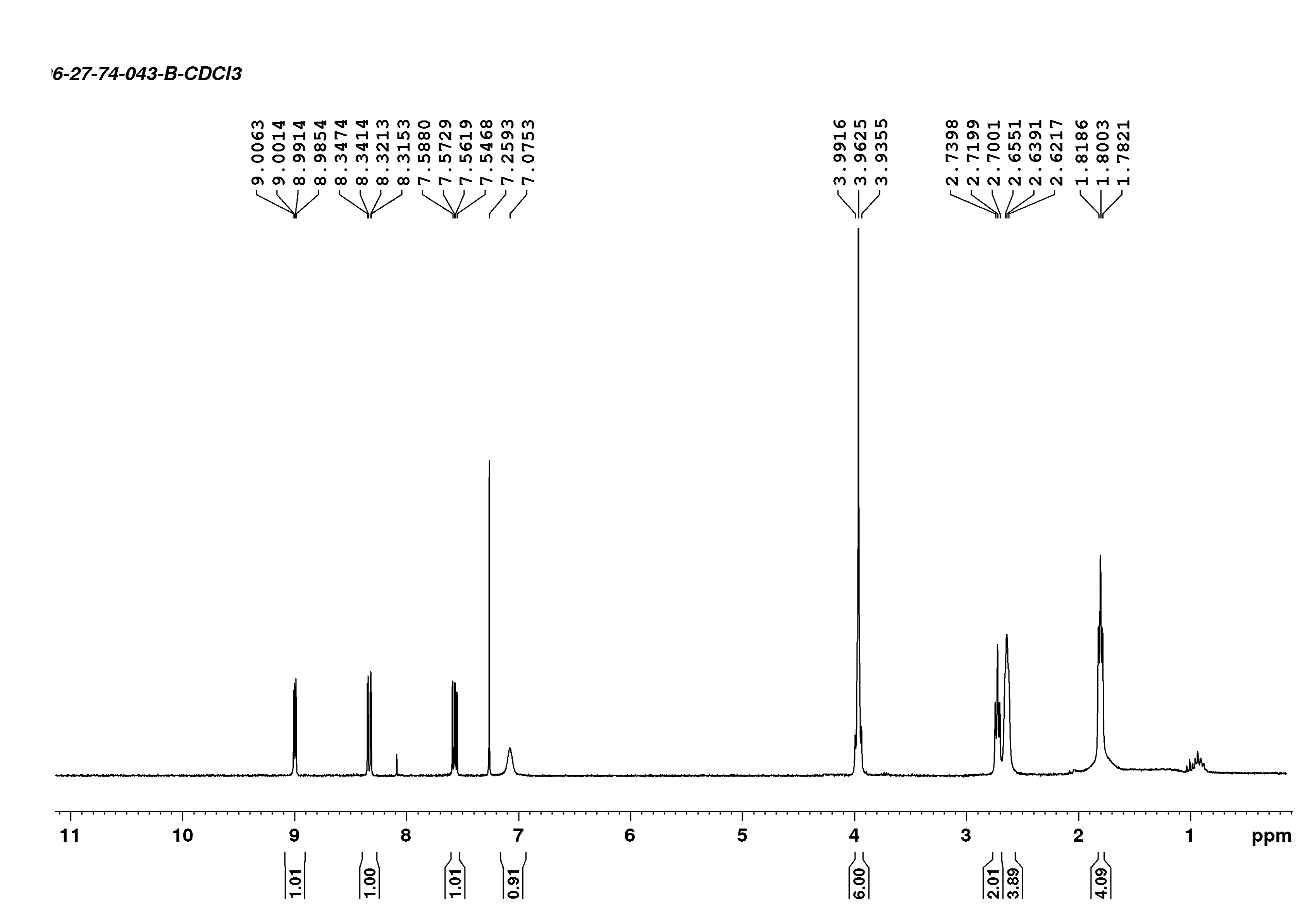


1H-NMR spectrum of compound **D5b**


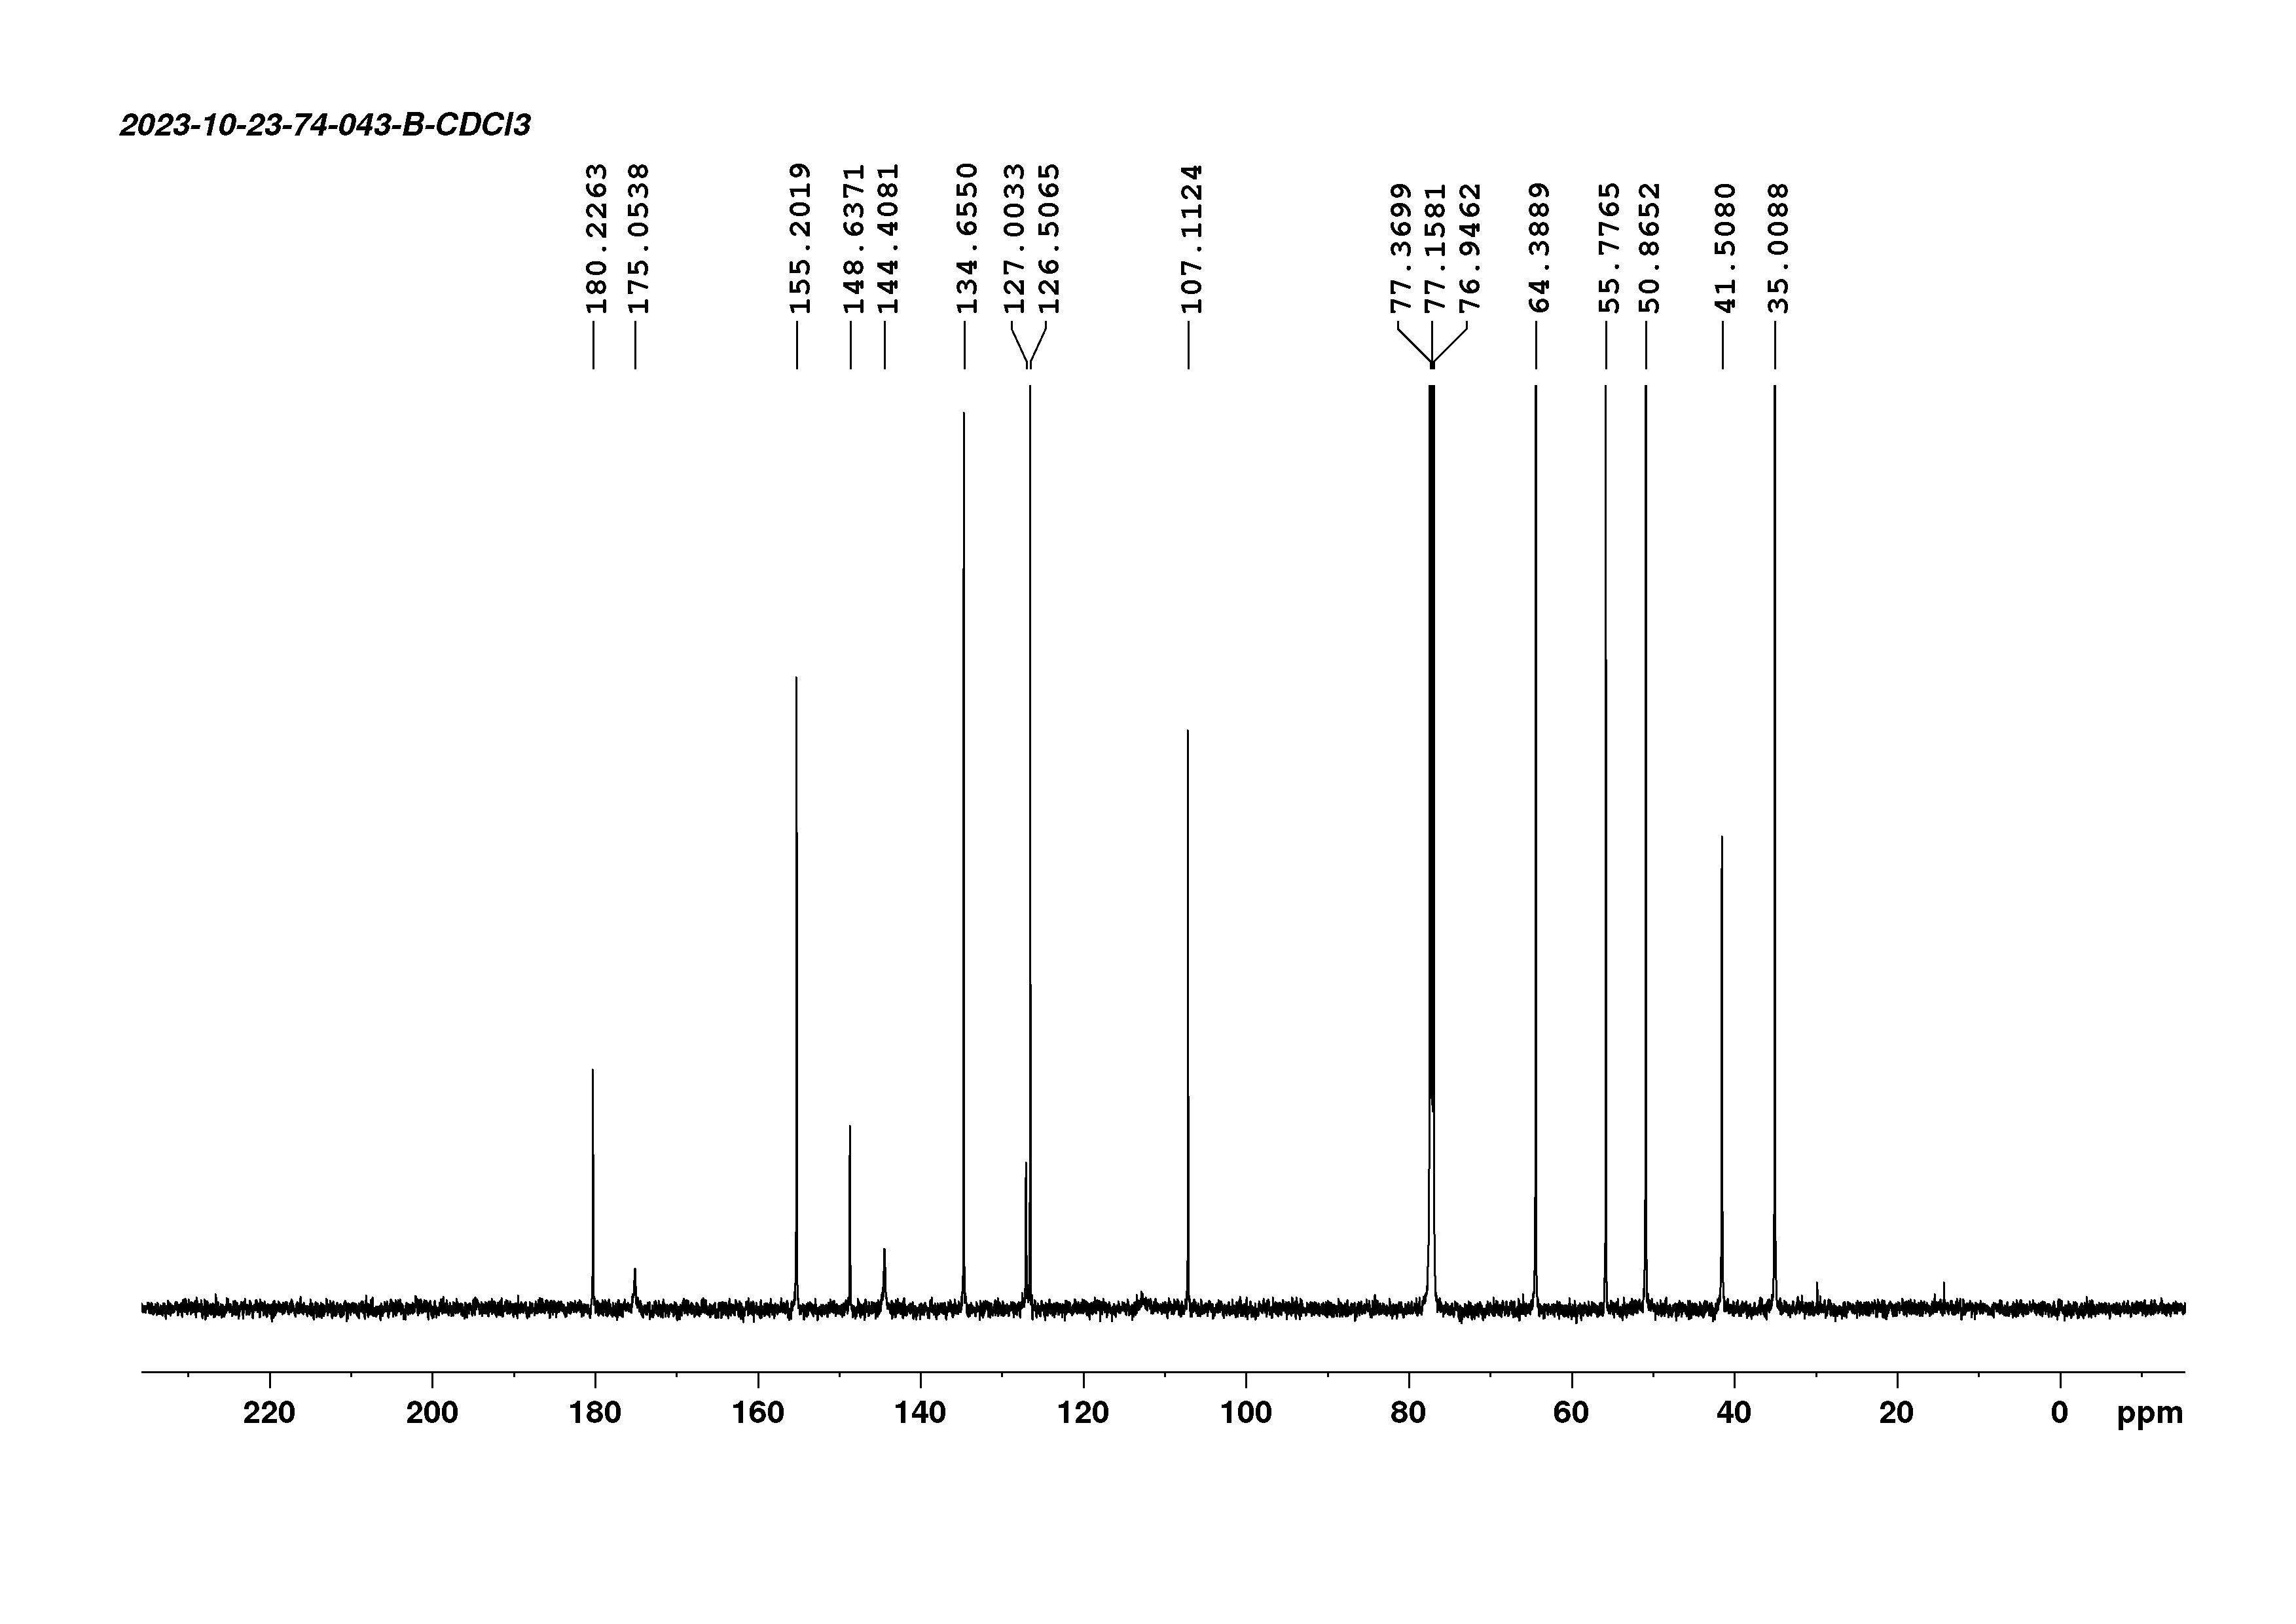


13C-NMR spectrum of compound **D5b**

**
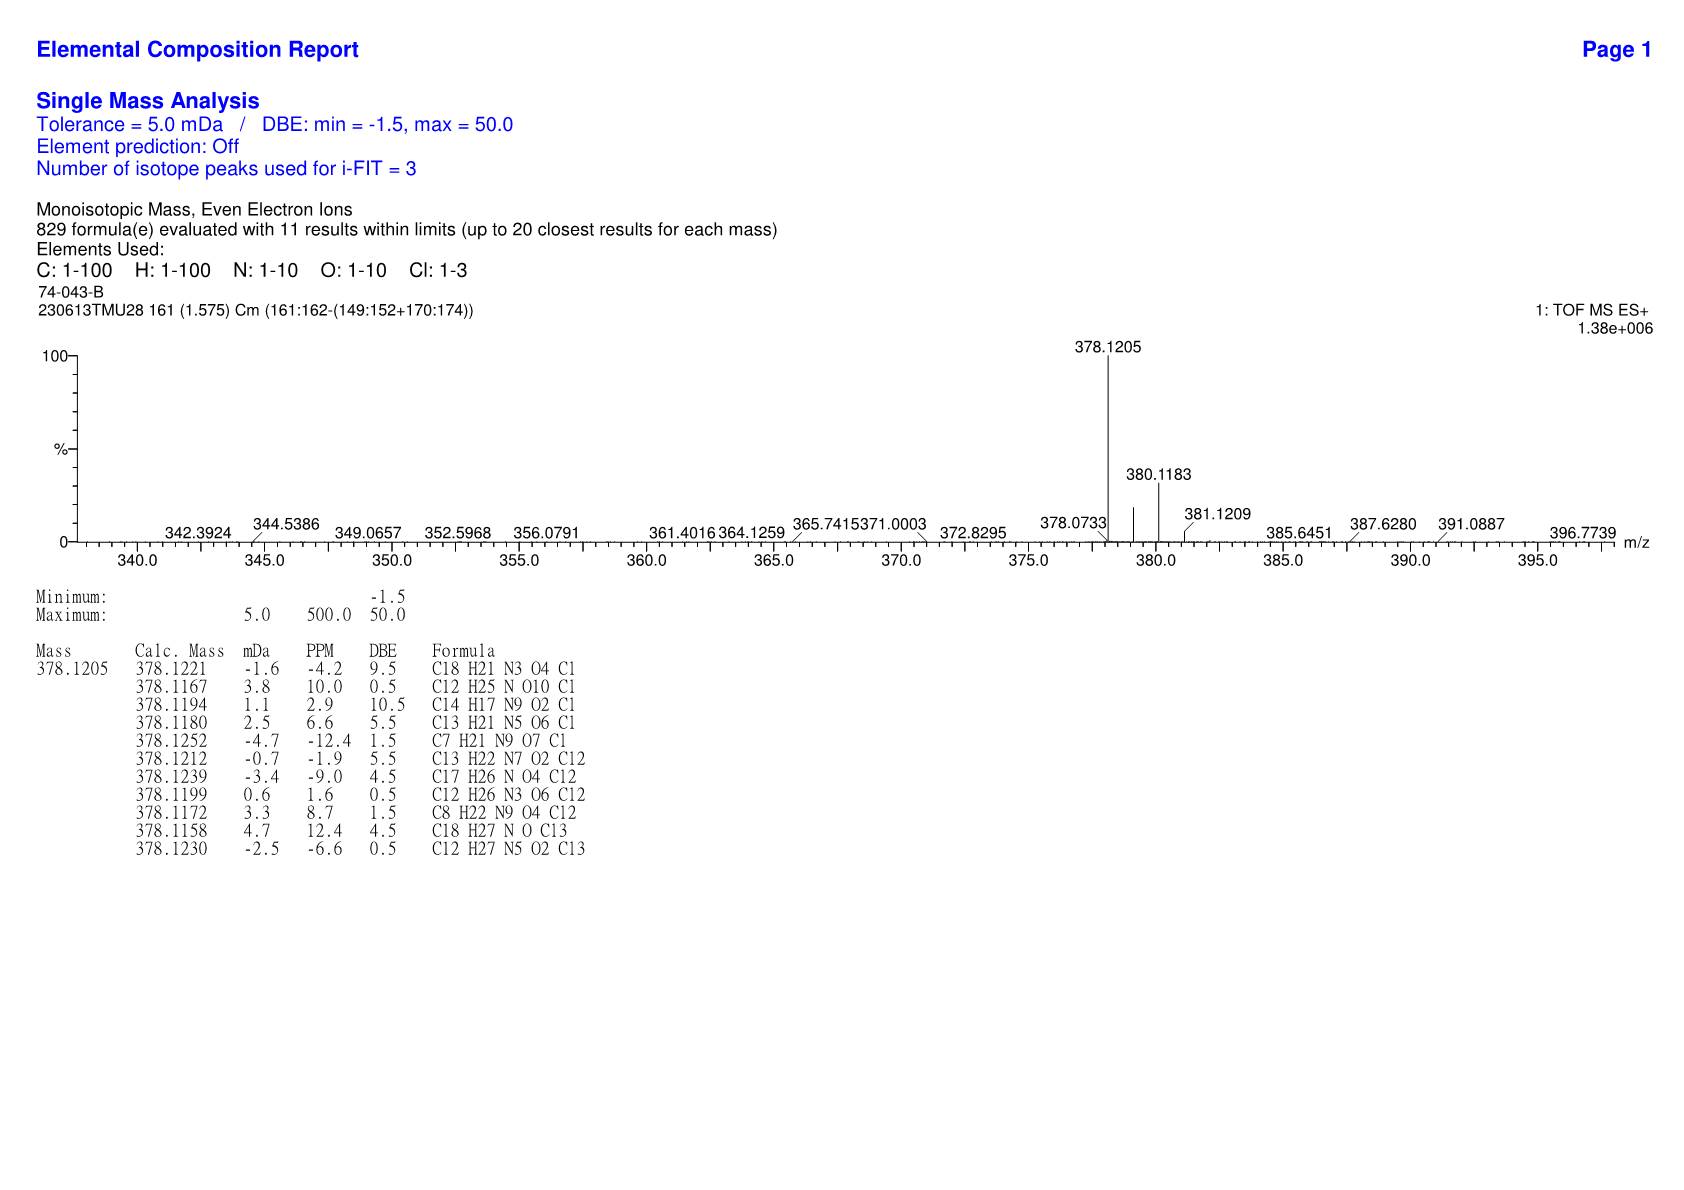
**

HRMS spectrum of compound **D5b**


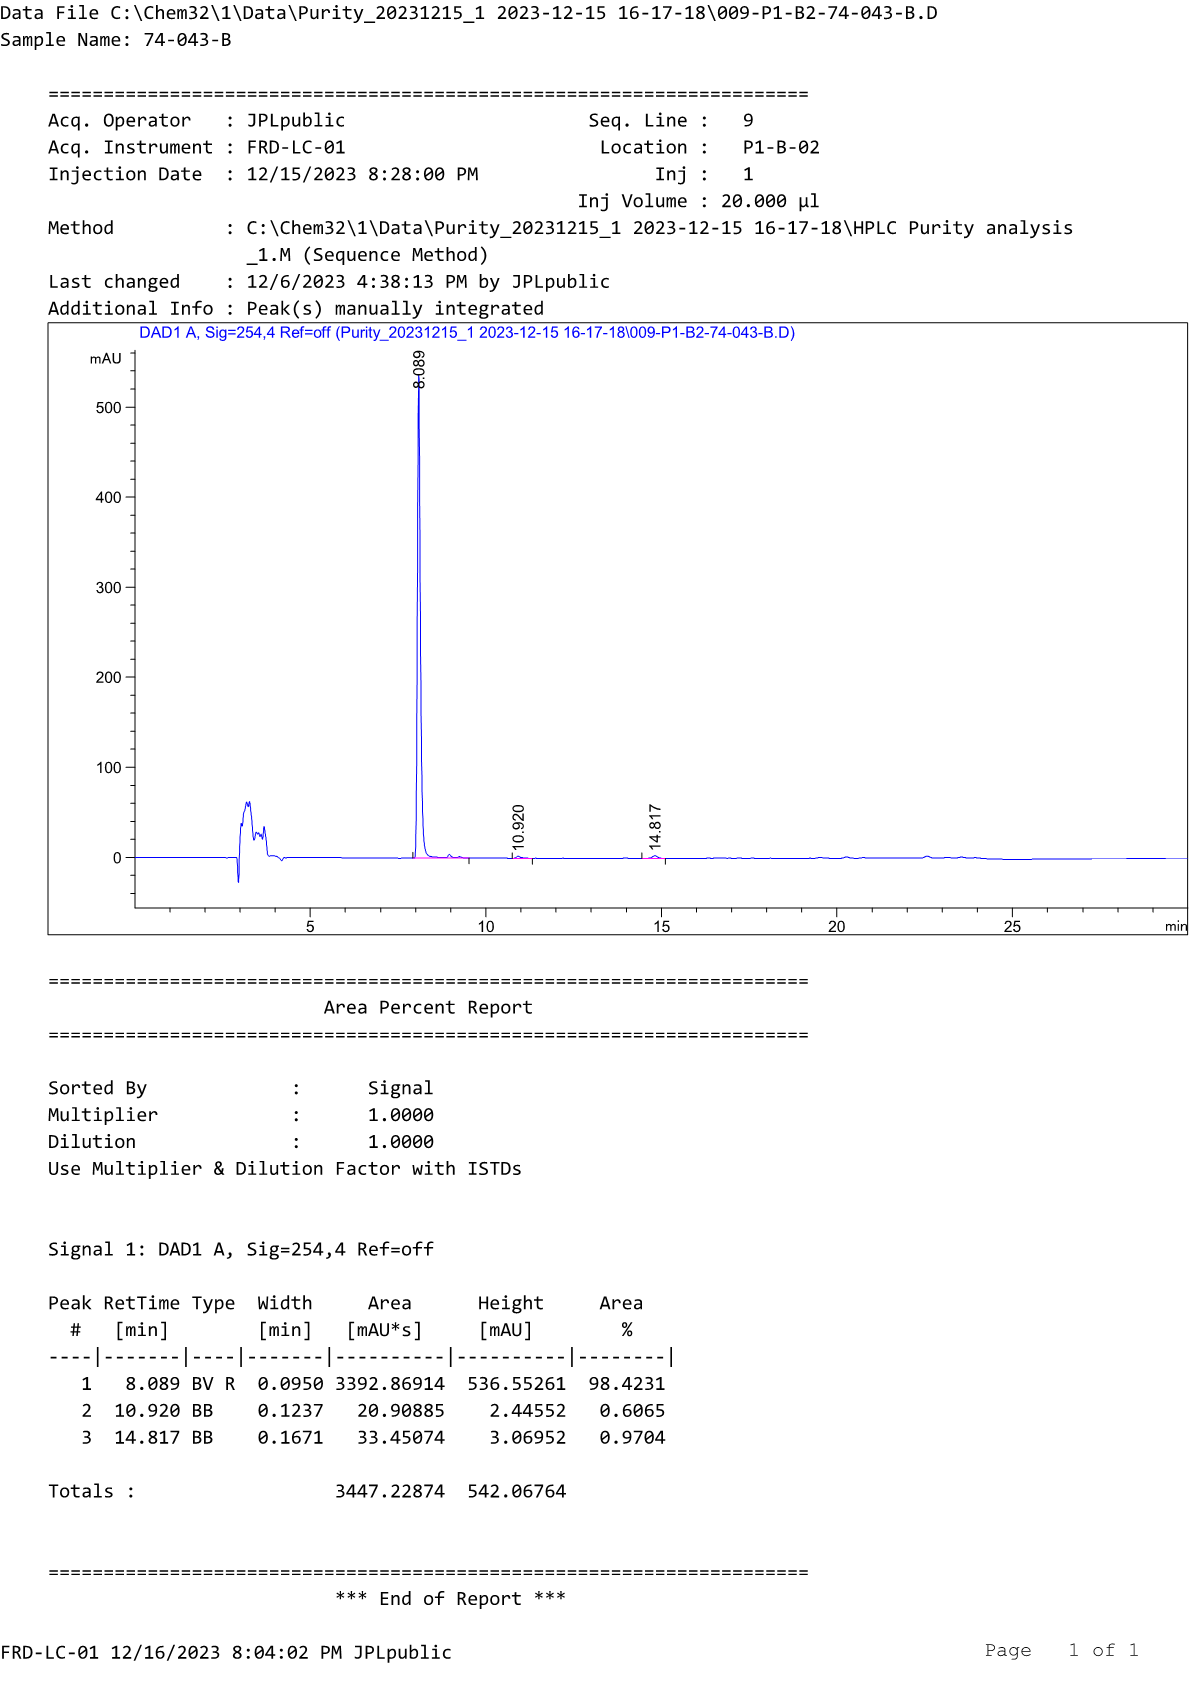


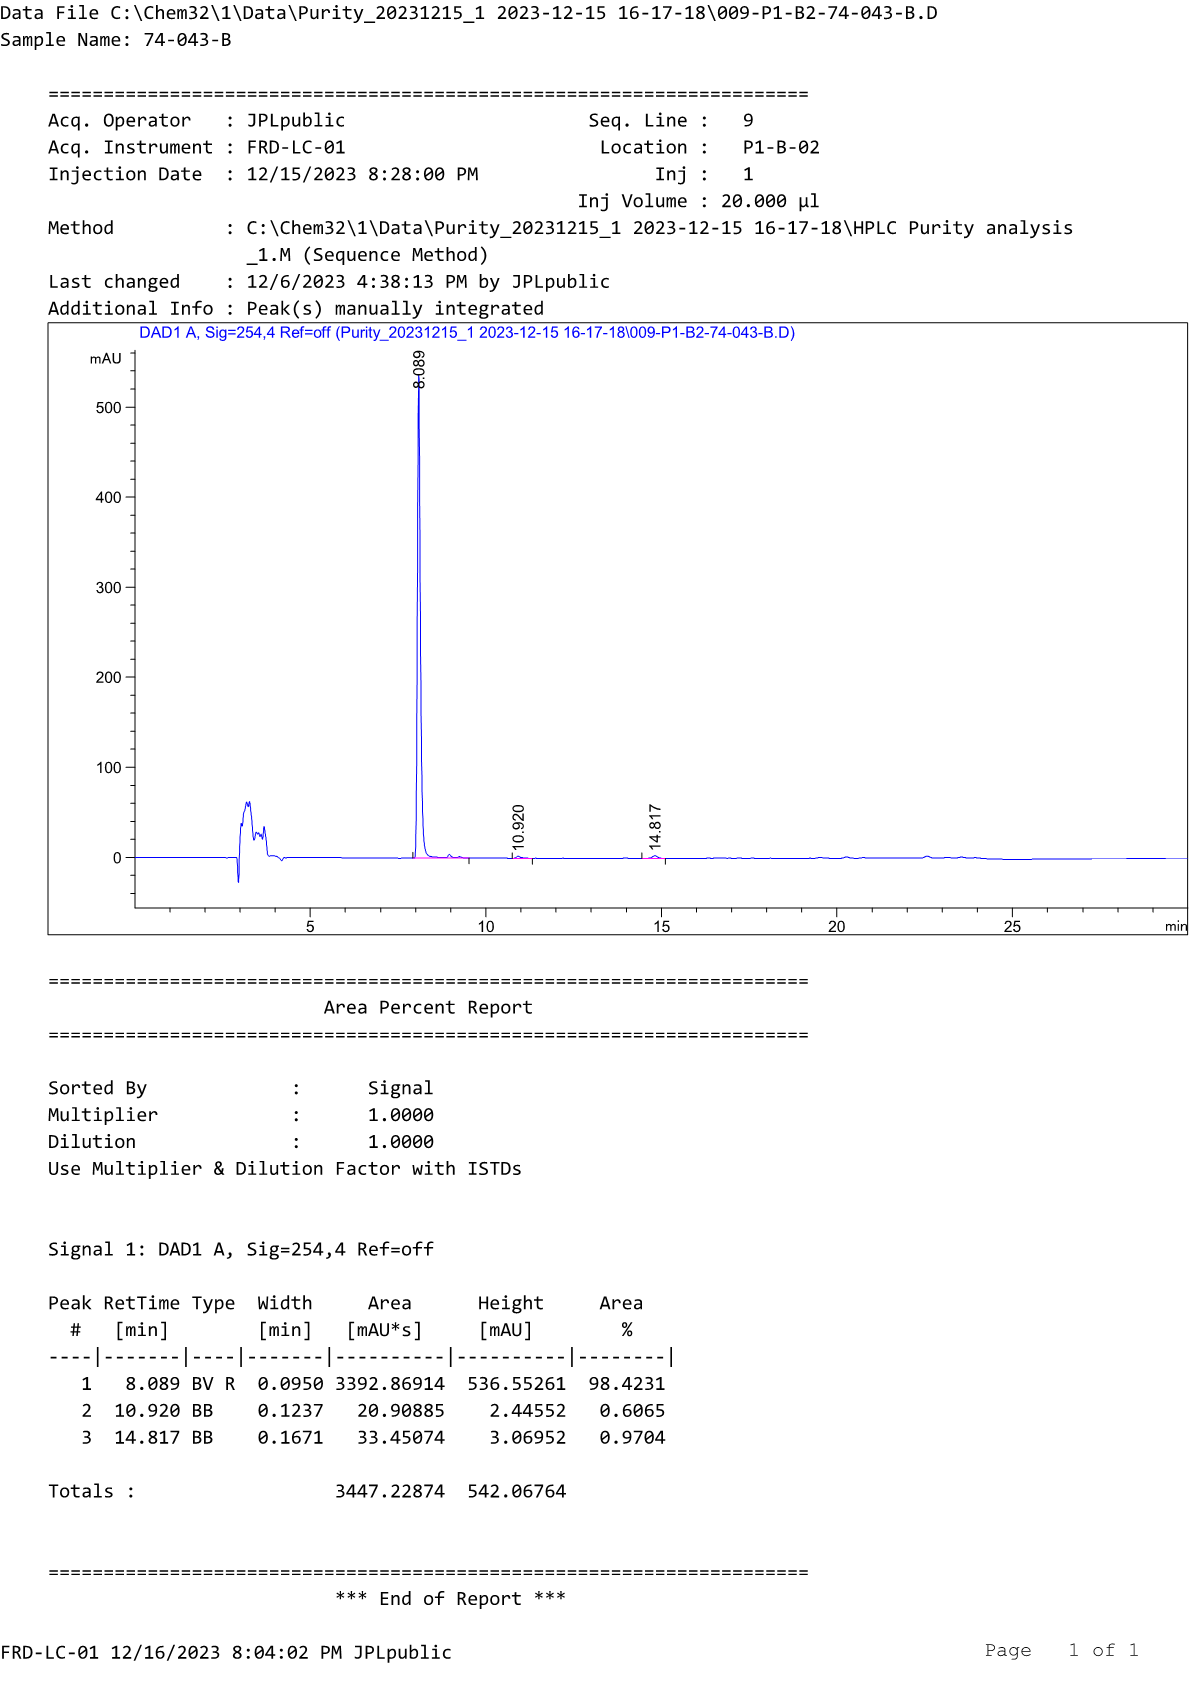


HPLC profile of compound **D5b**


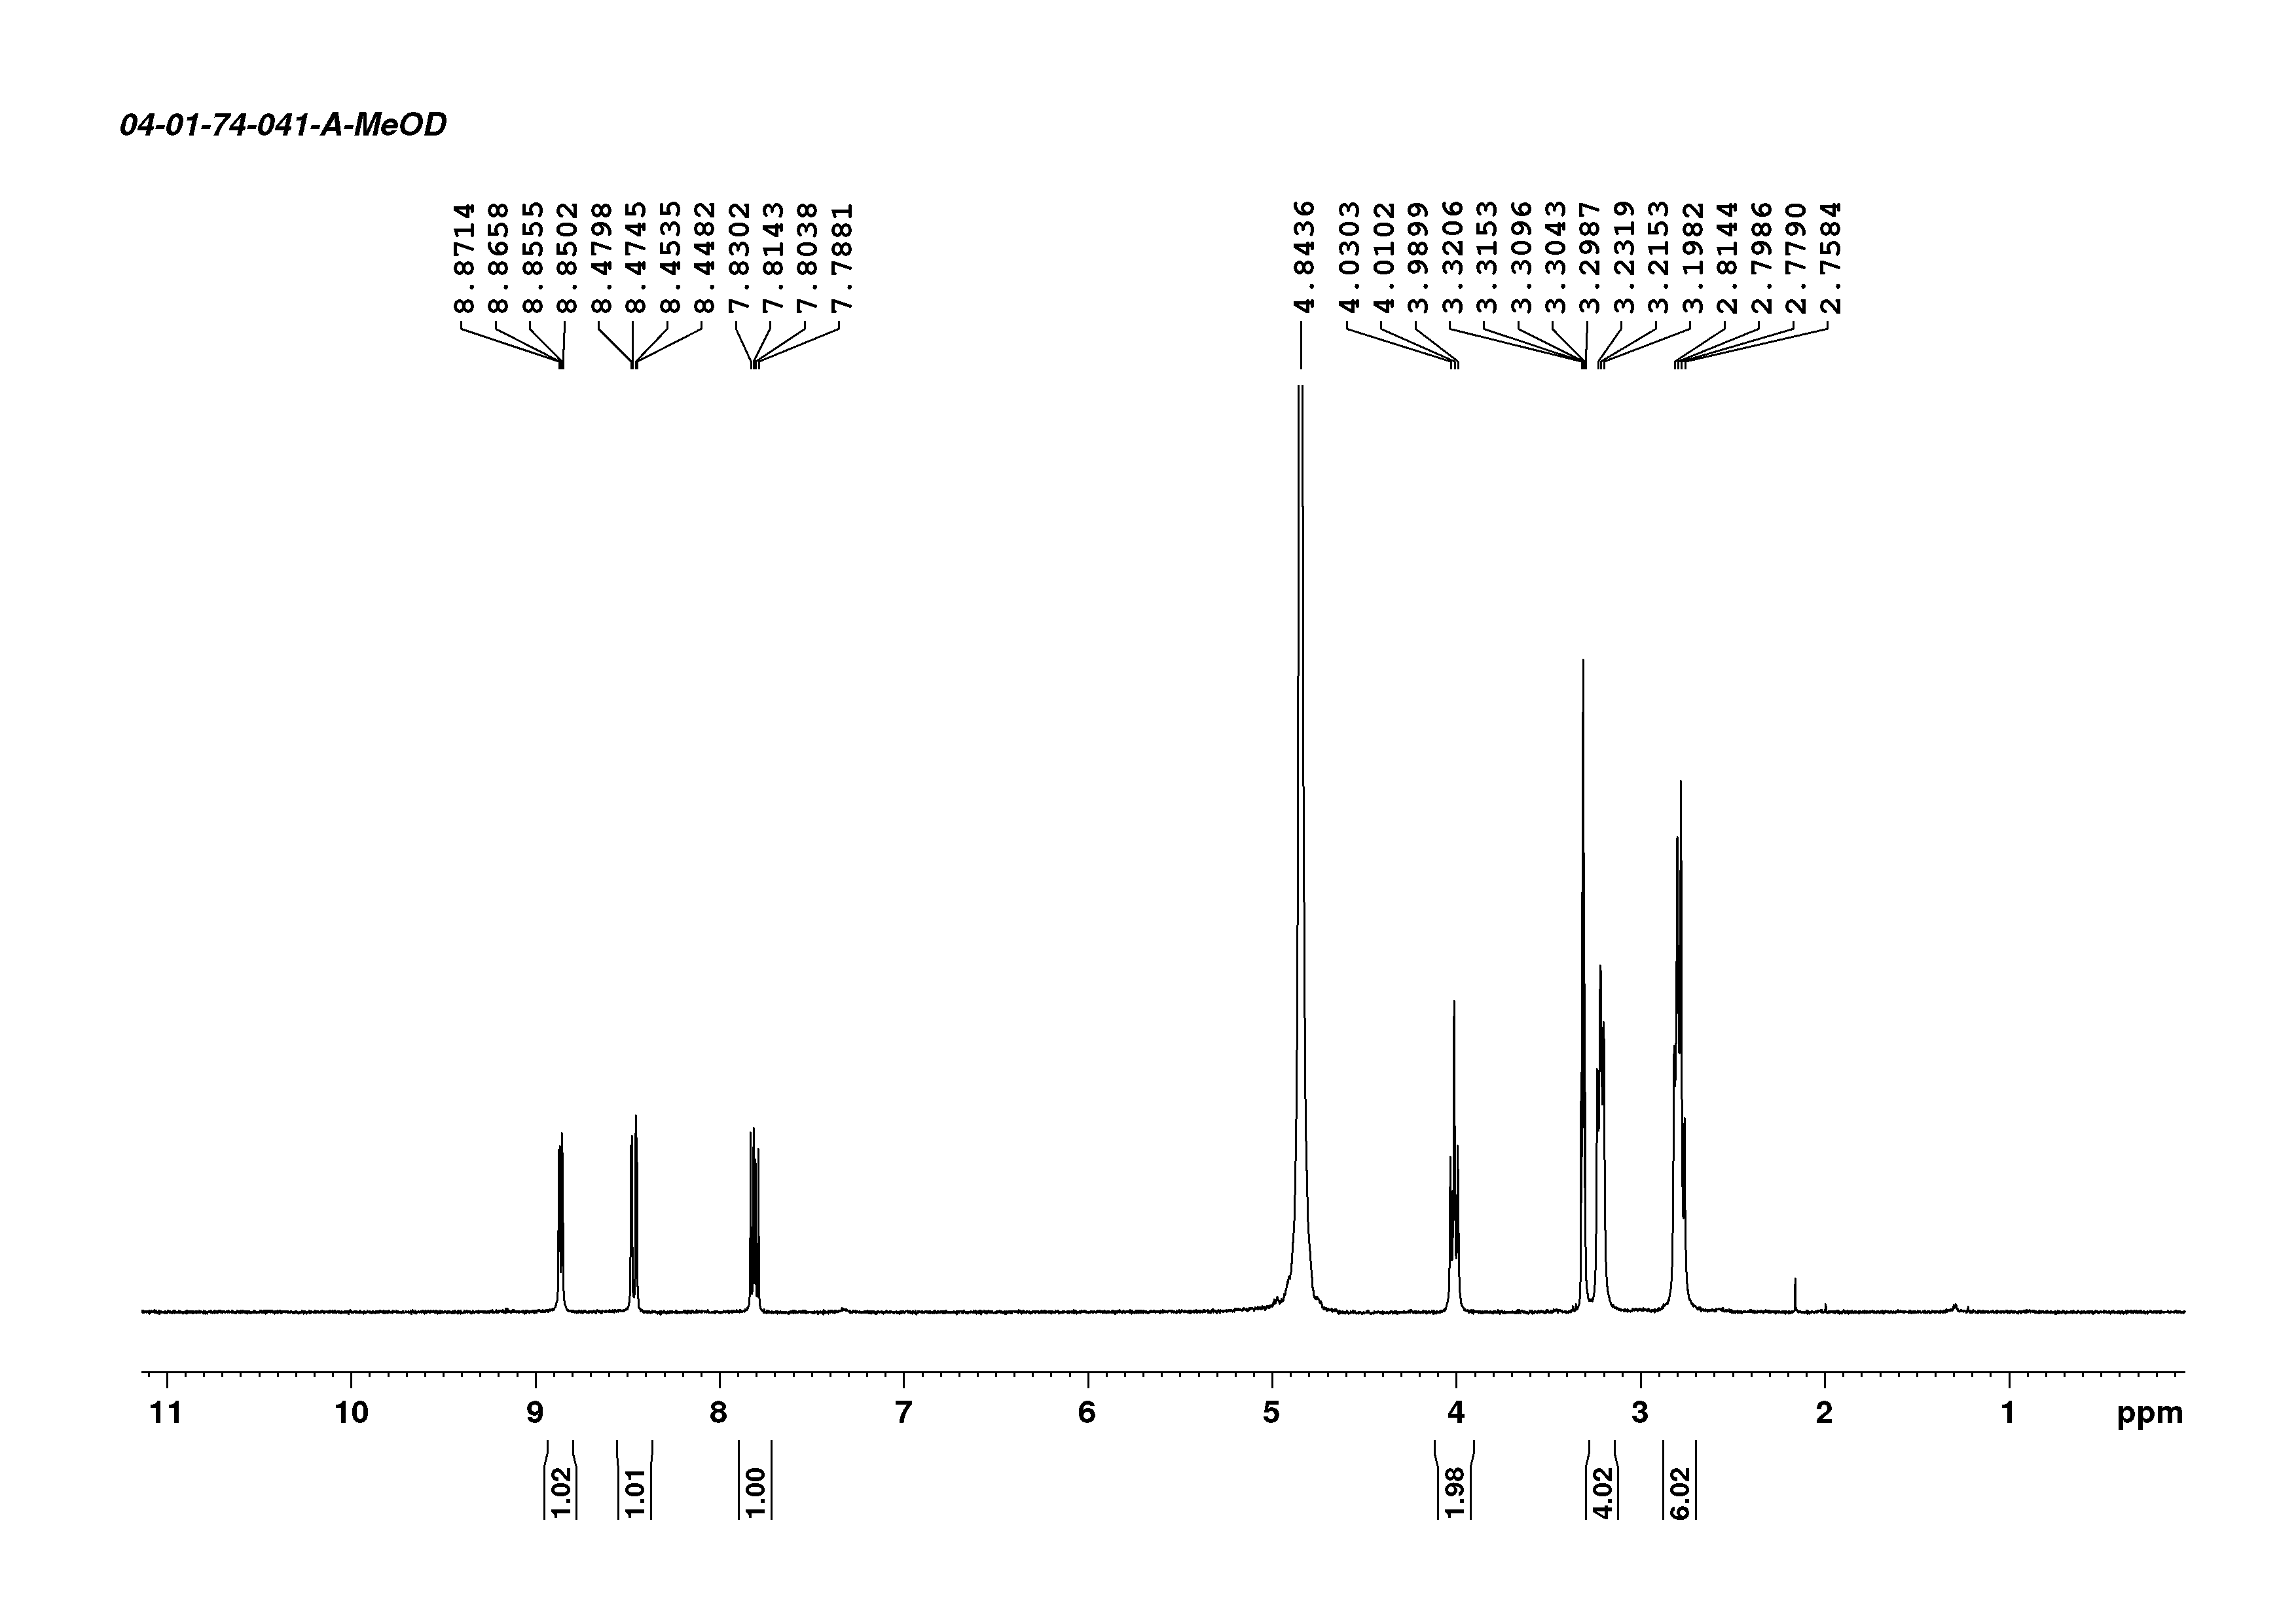


1H-NMR spectrum of compound **D6a**

**
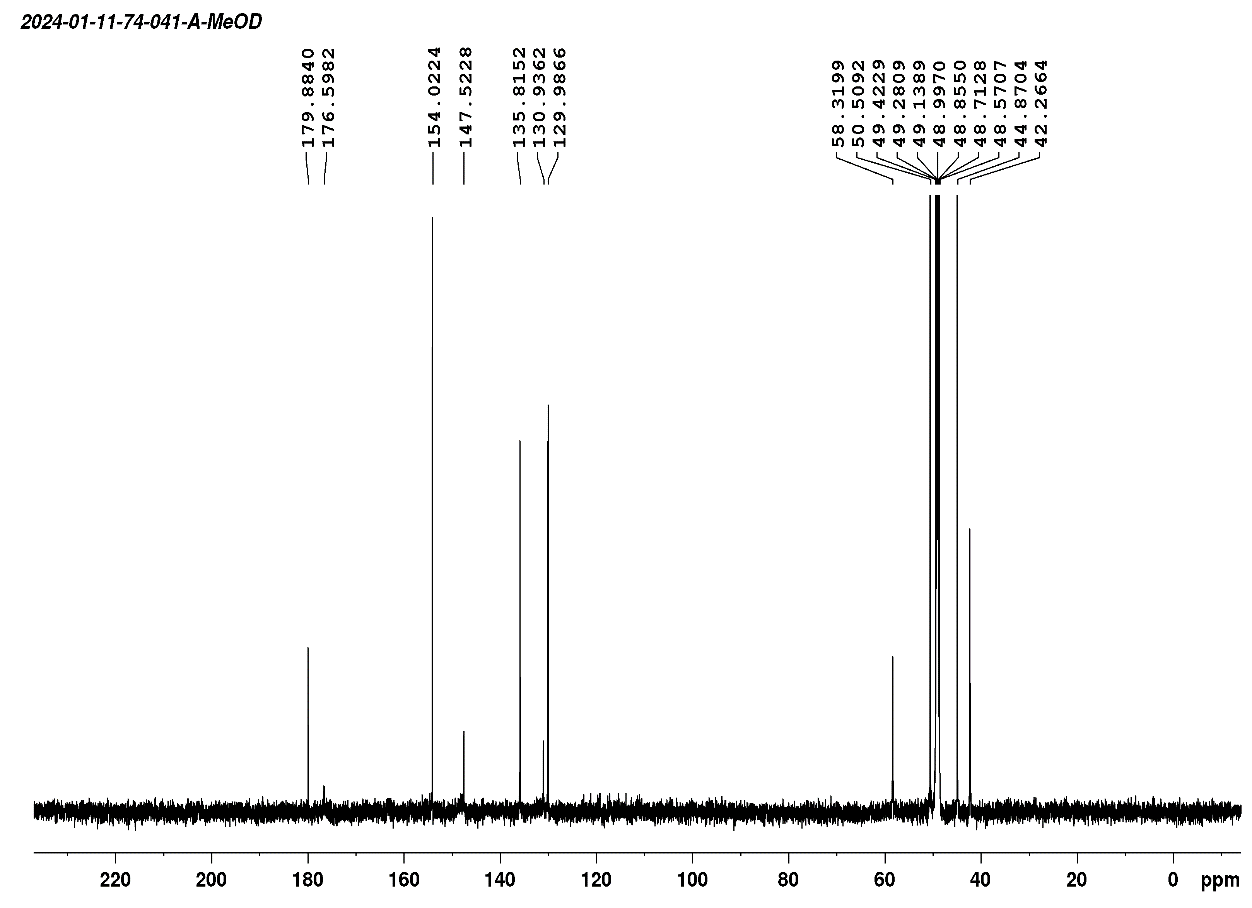
**

13C-NMR spectrum of compound **D6a**

**
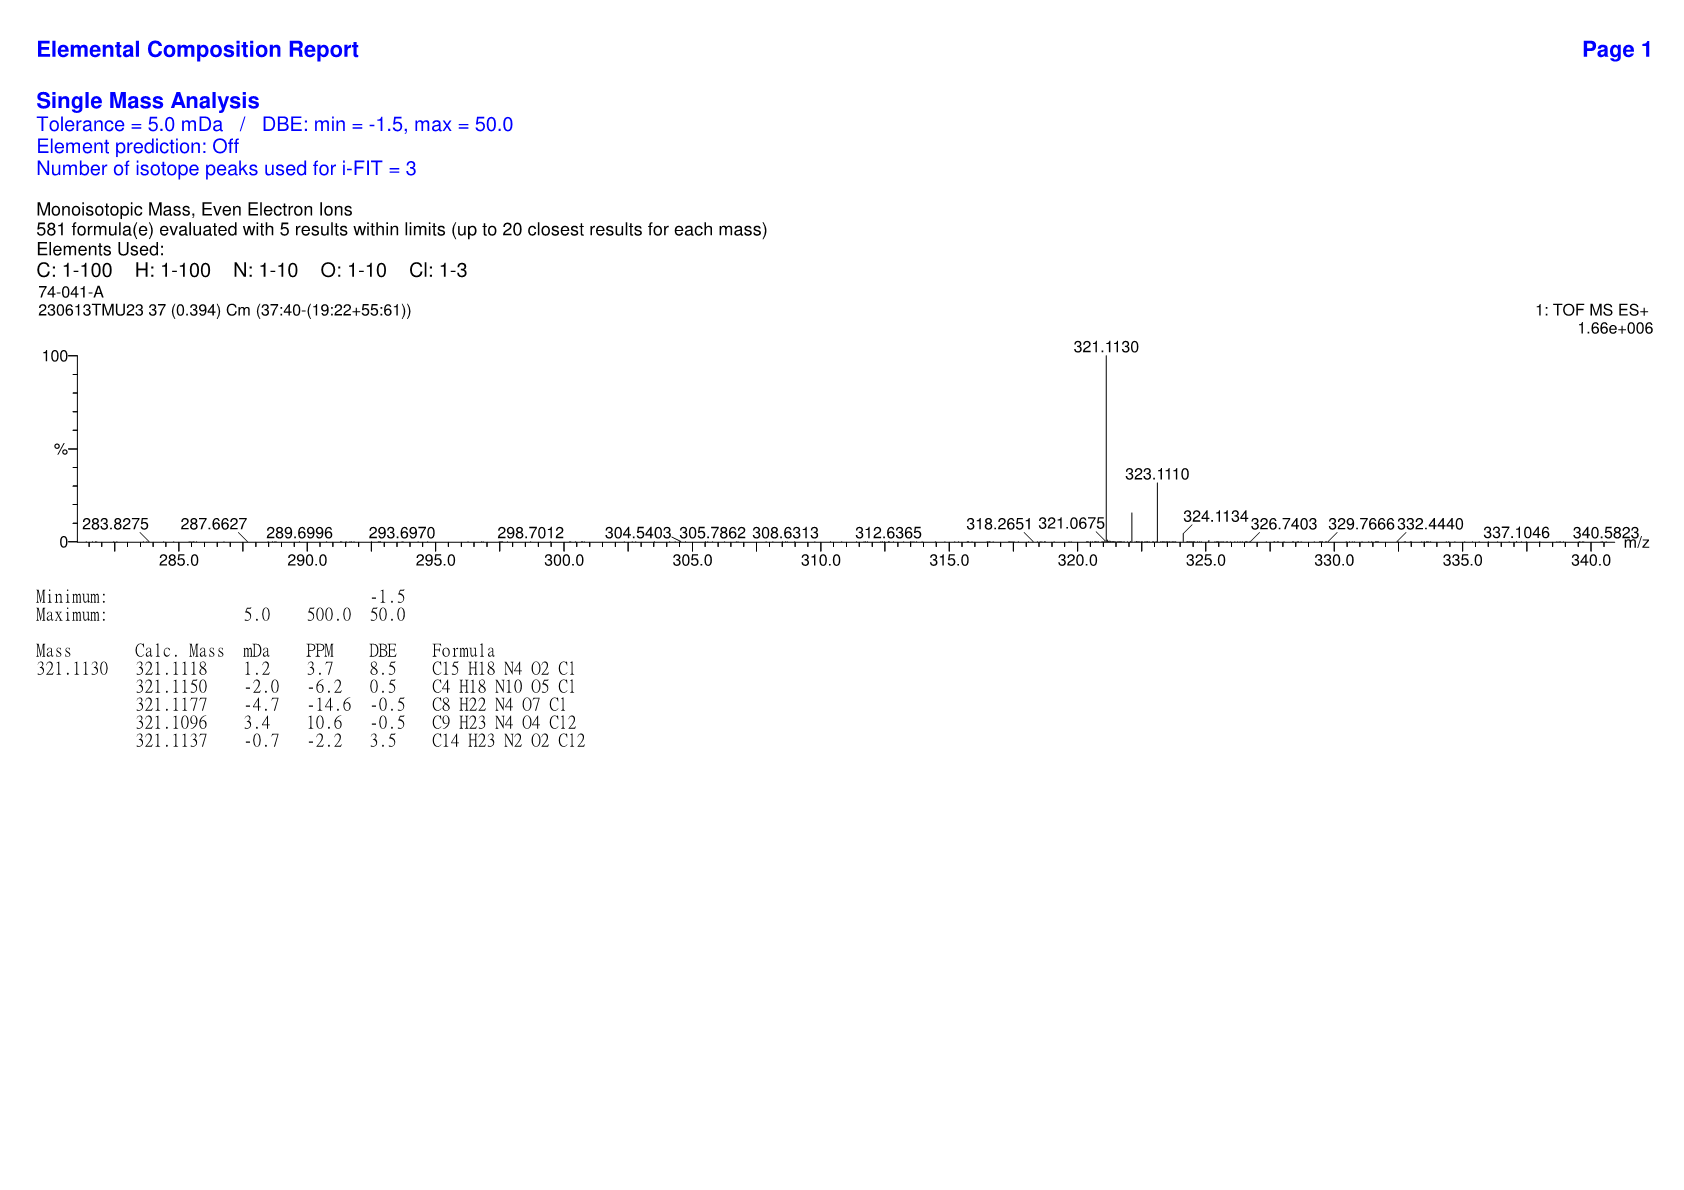
**

HRMS spectrum of compound **D6a**


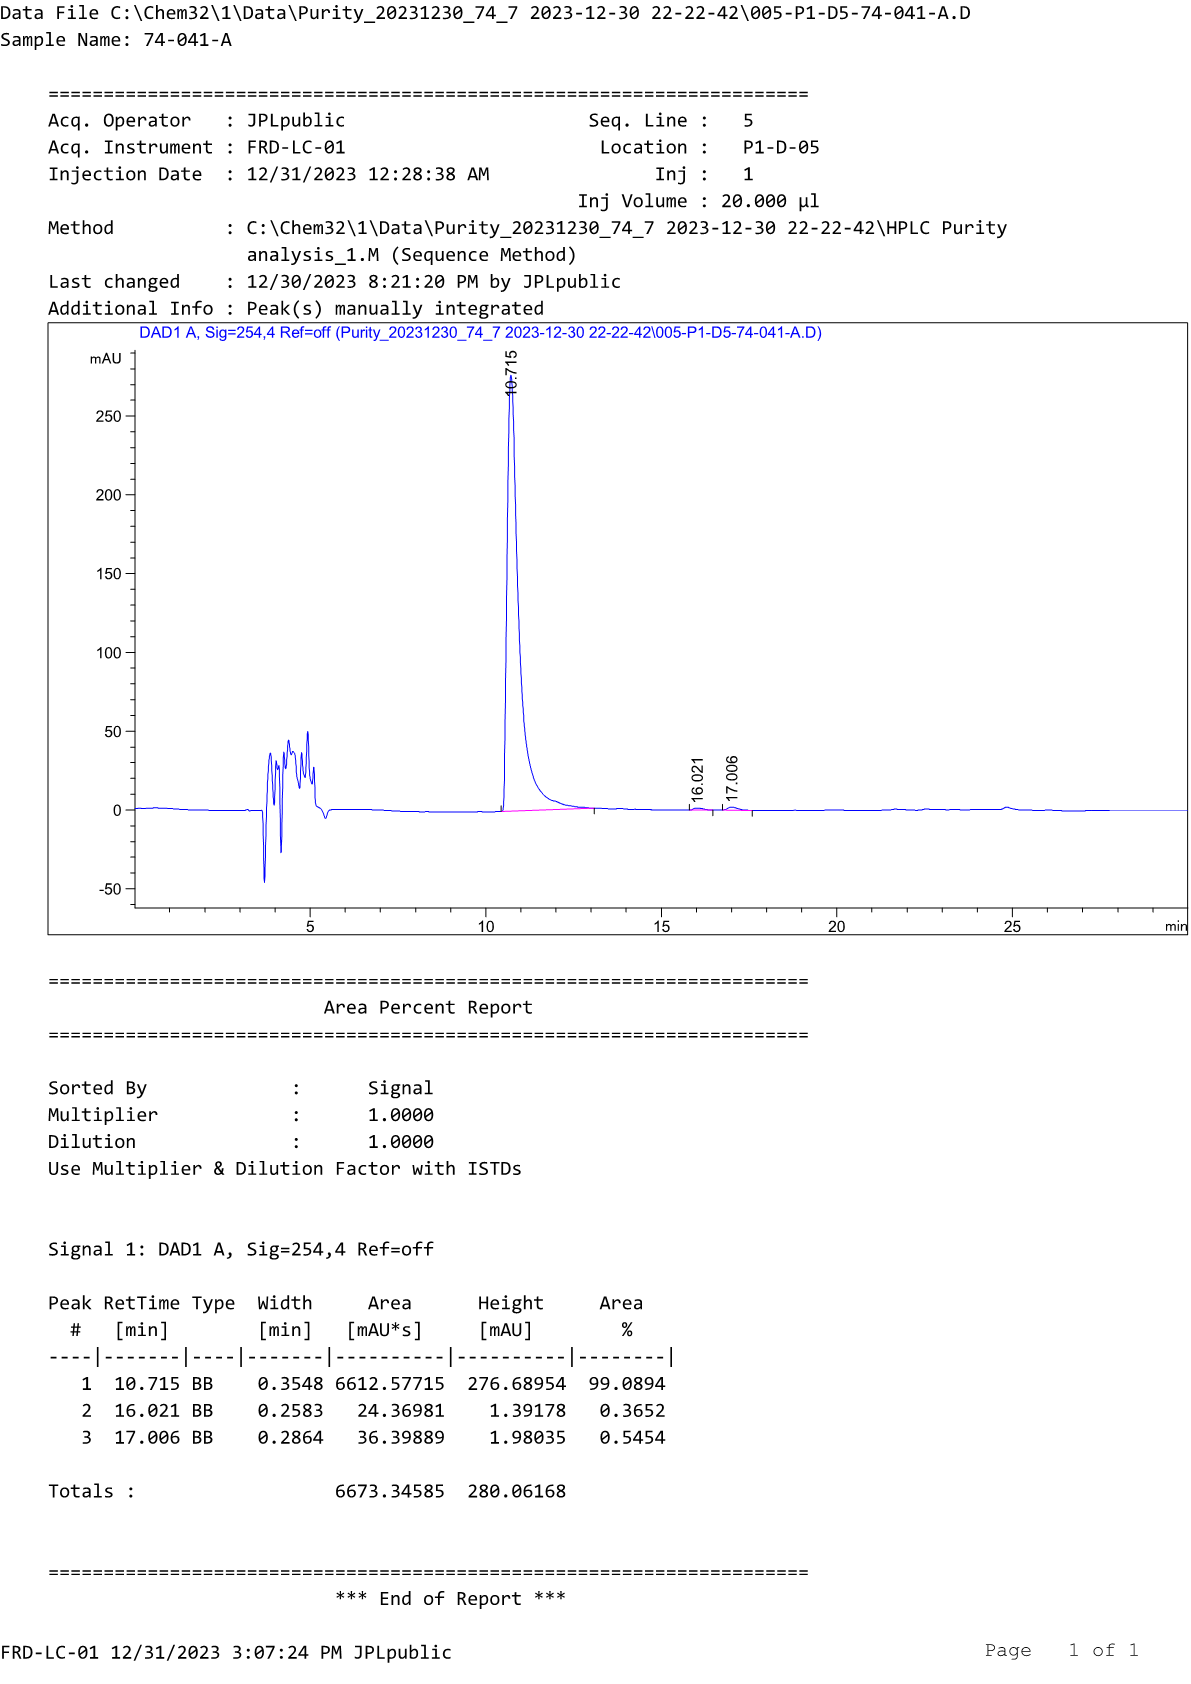


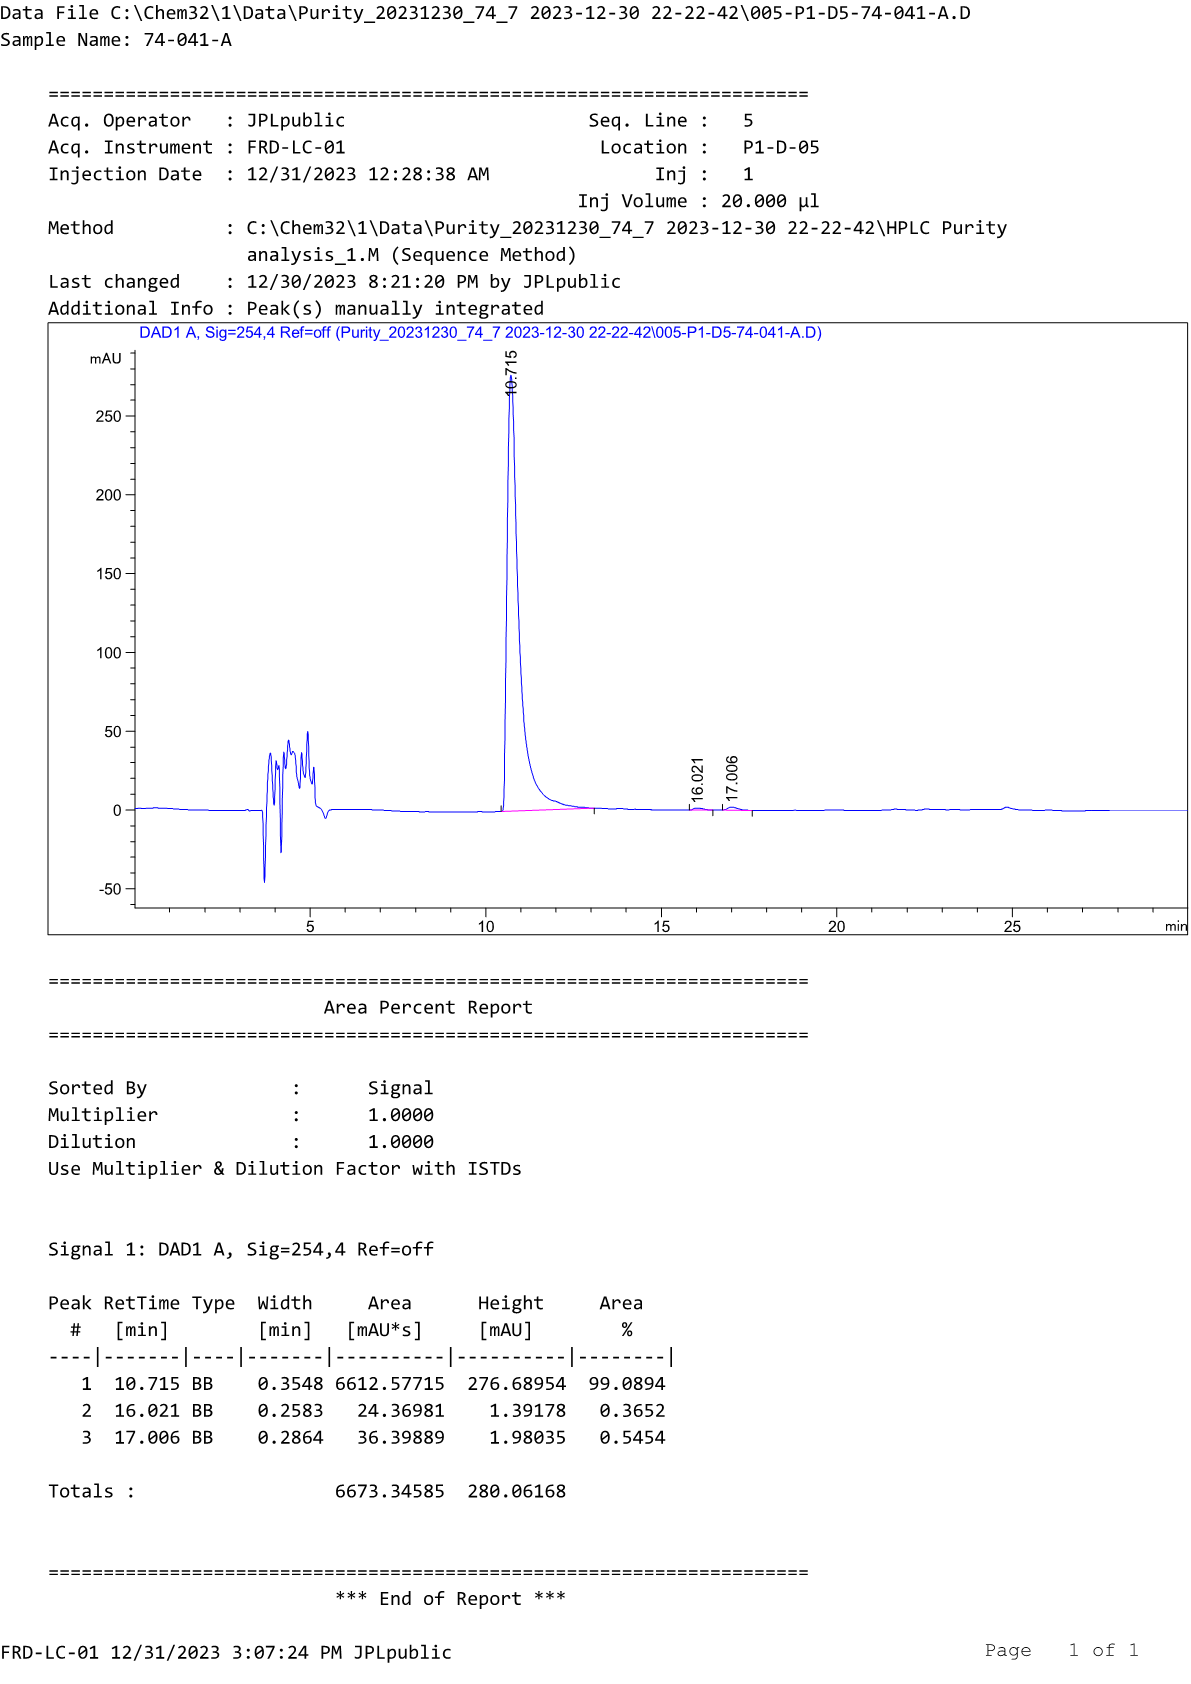


HPLC profile of compound **D6a**


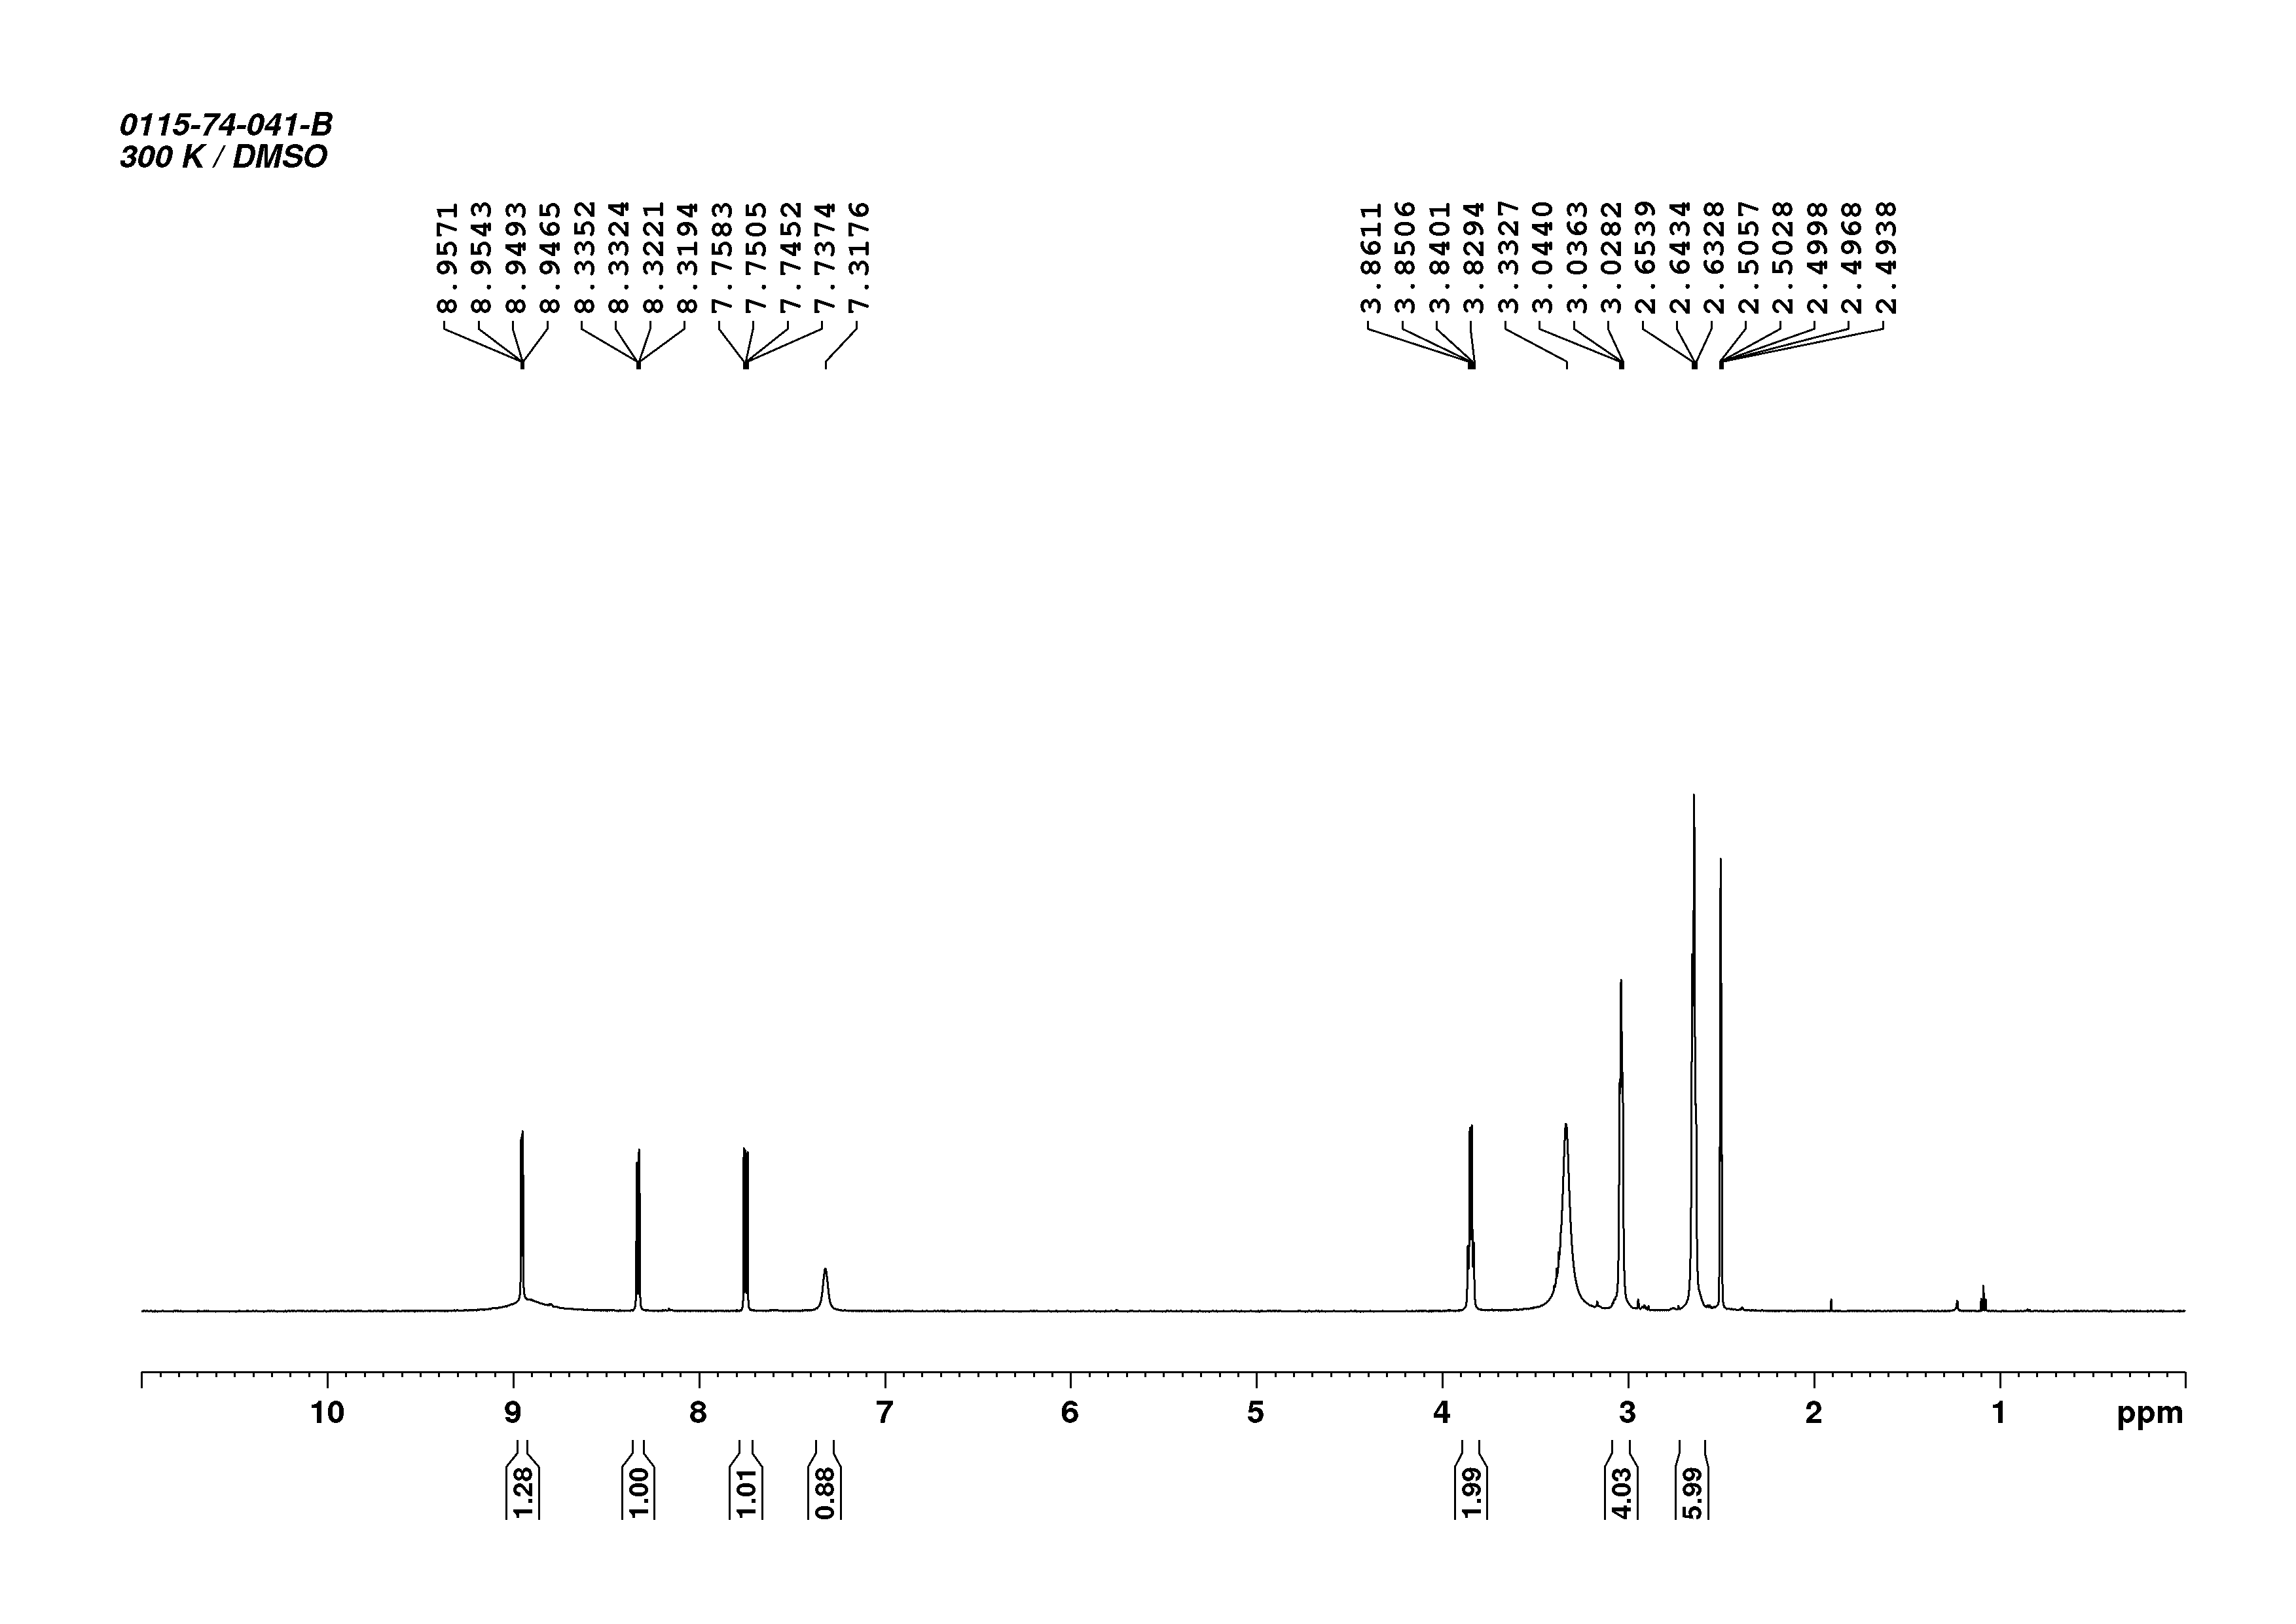


1H-NMR spectrum of compound **D6b**

**
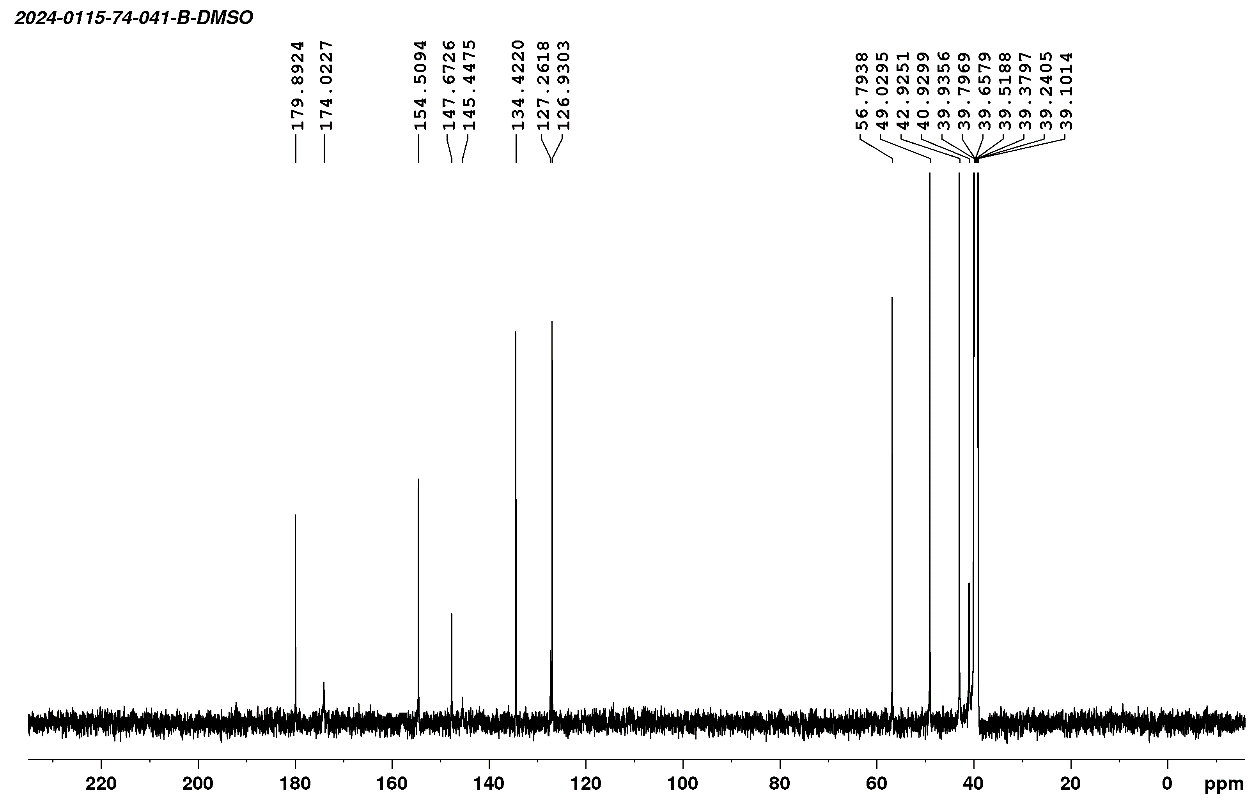
**

13C-NMR spectrum of compound **D6b**

**
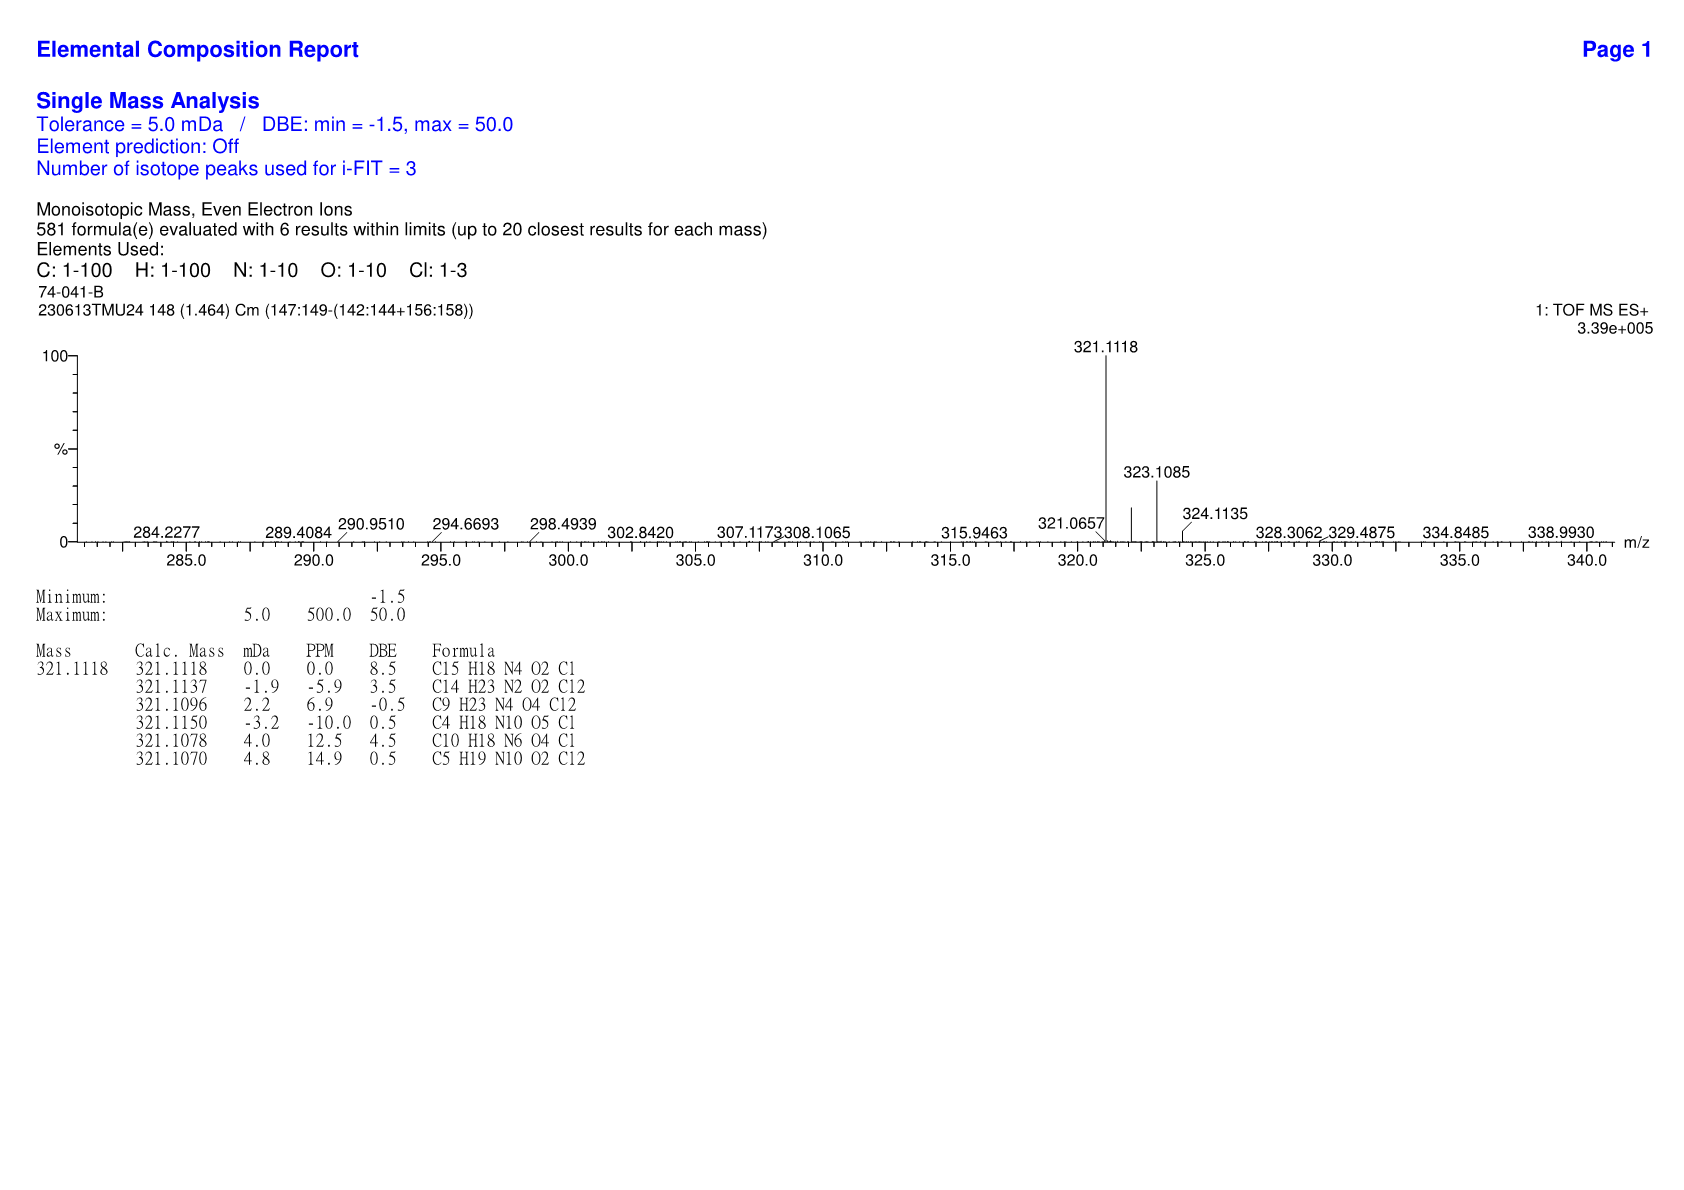
**

HRMS spectrum of compound **D6b**


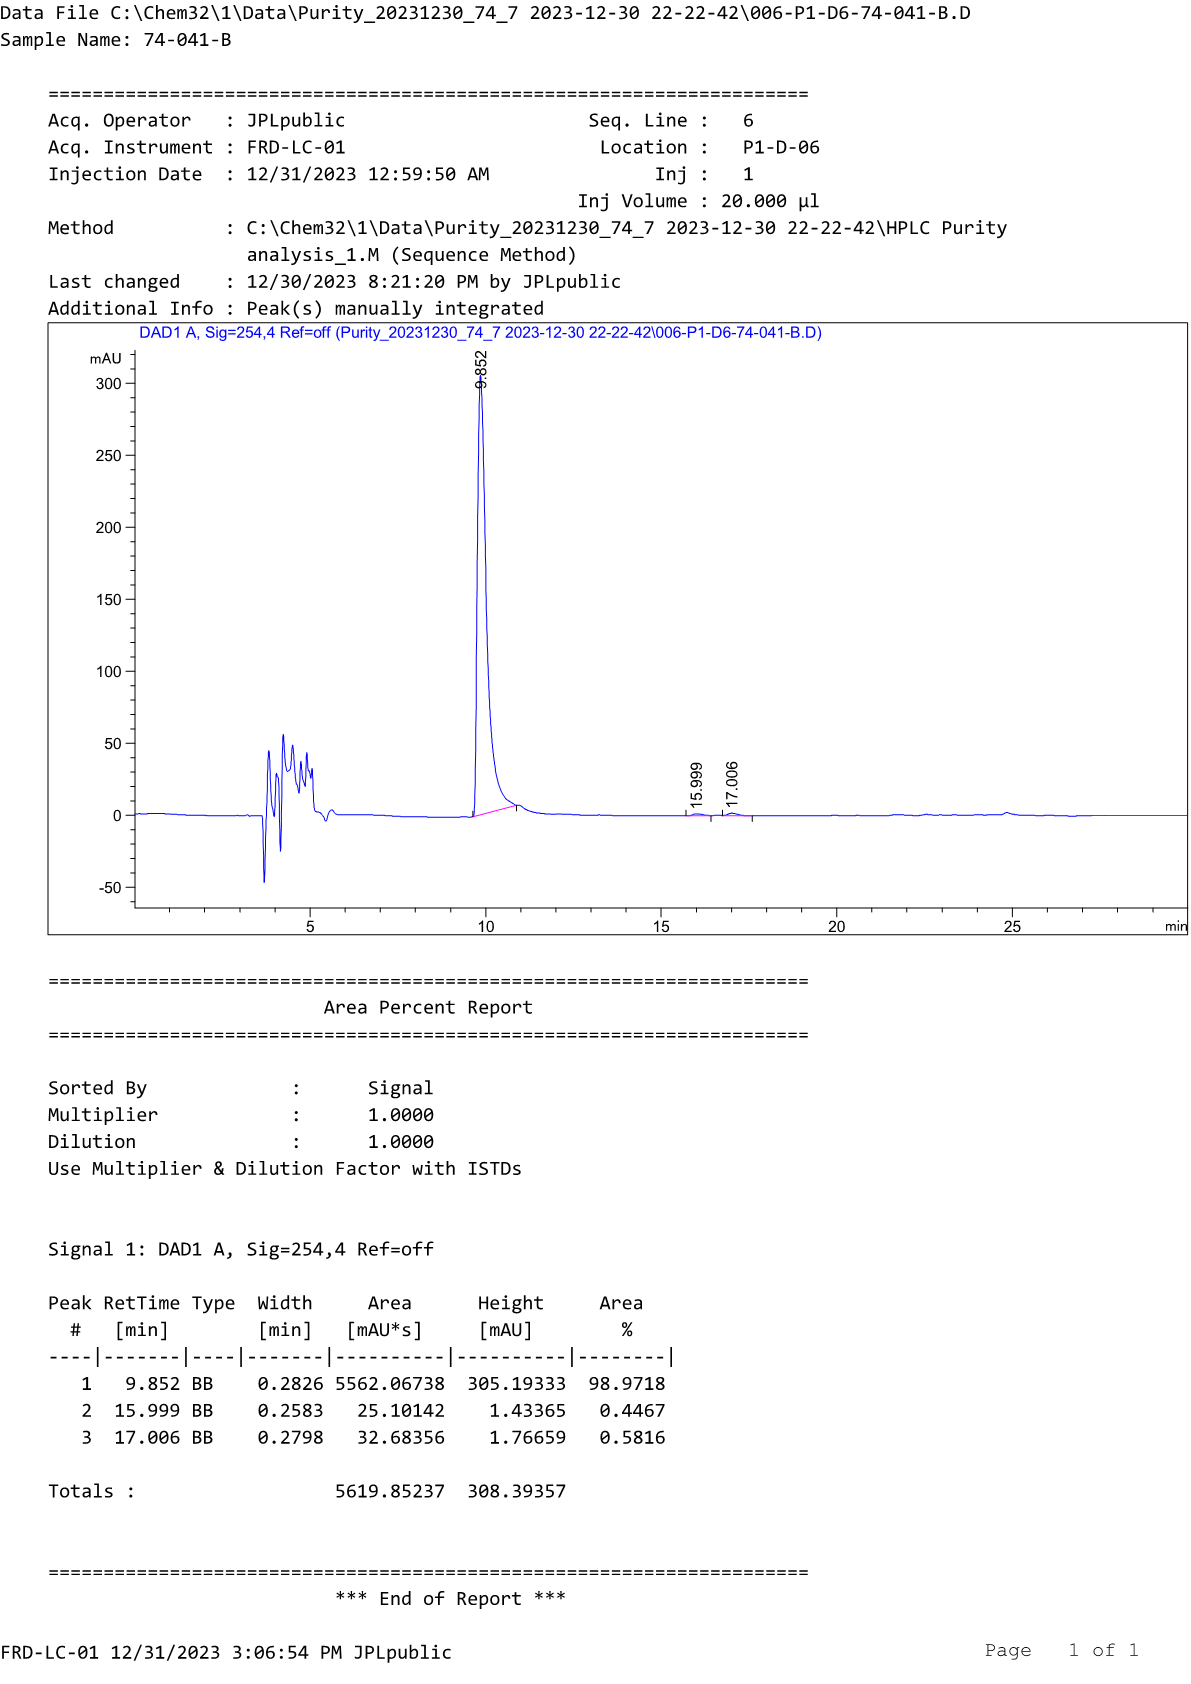


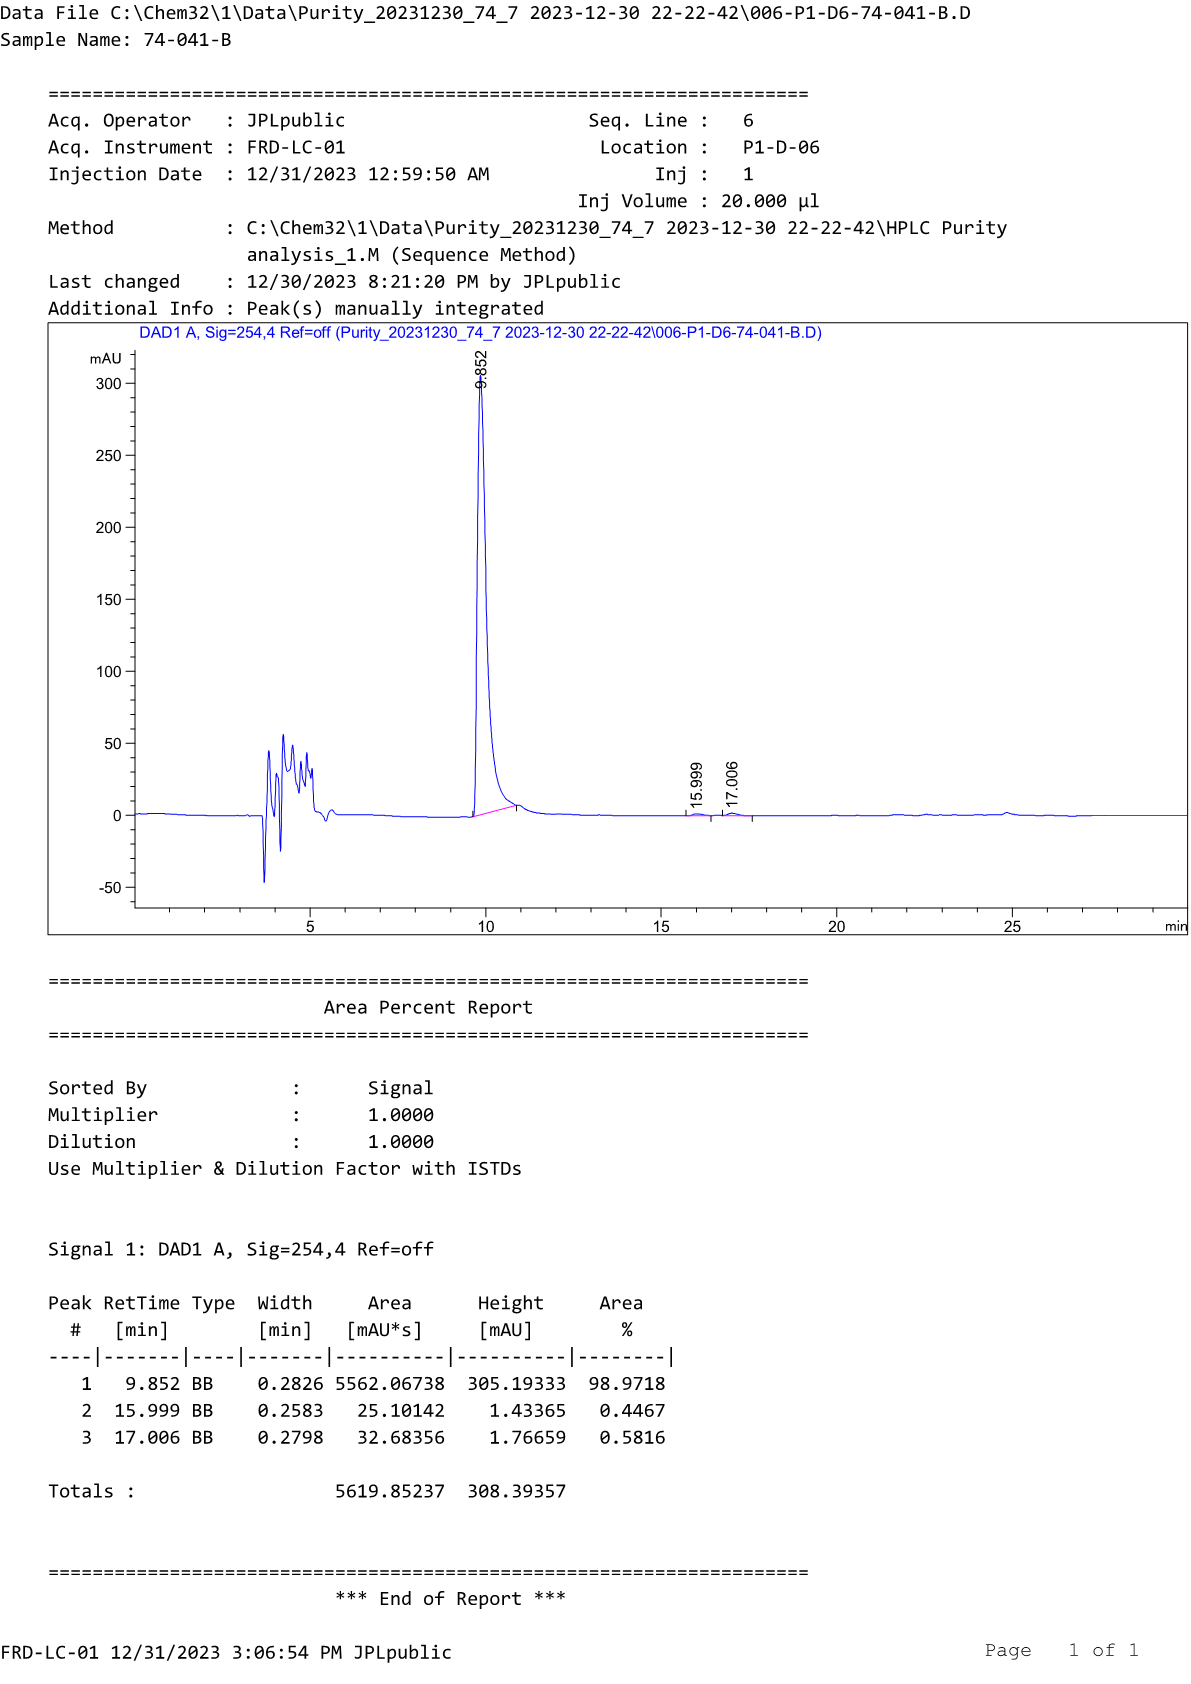


HPLC profile of compound **D6b**


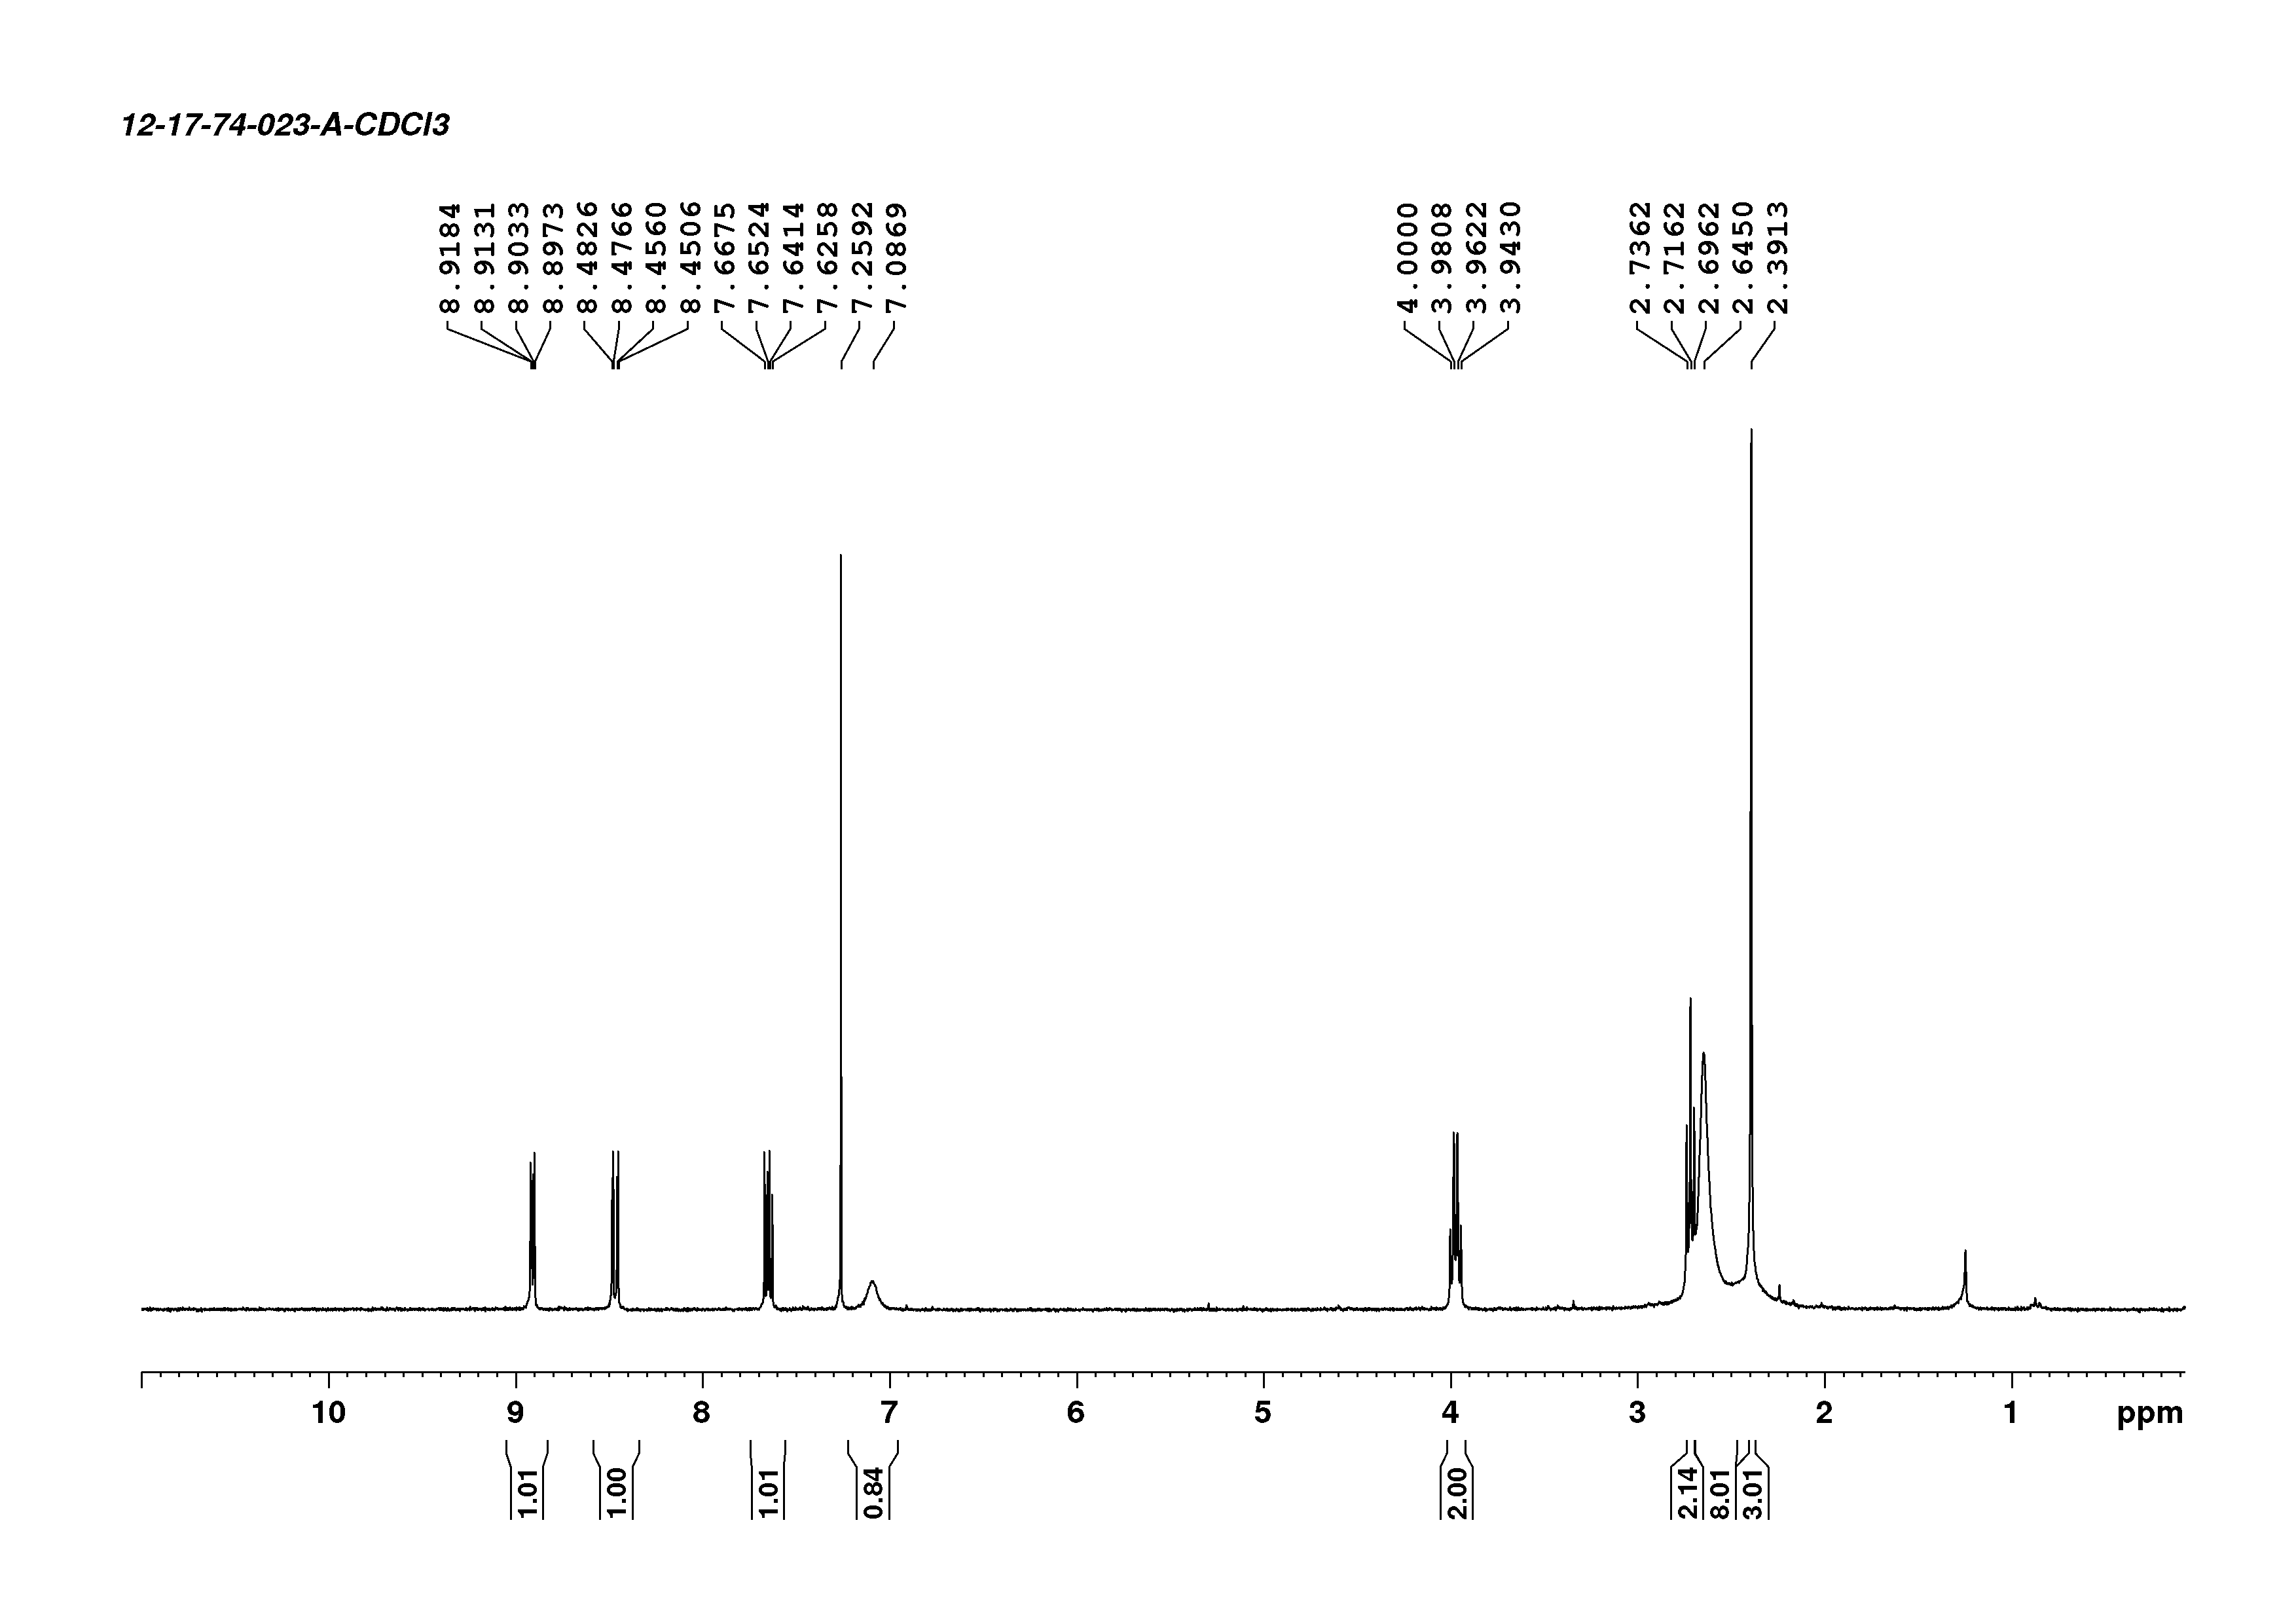


1H-NMR spectrum of compound **D7a**


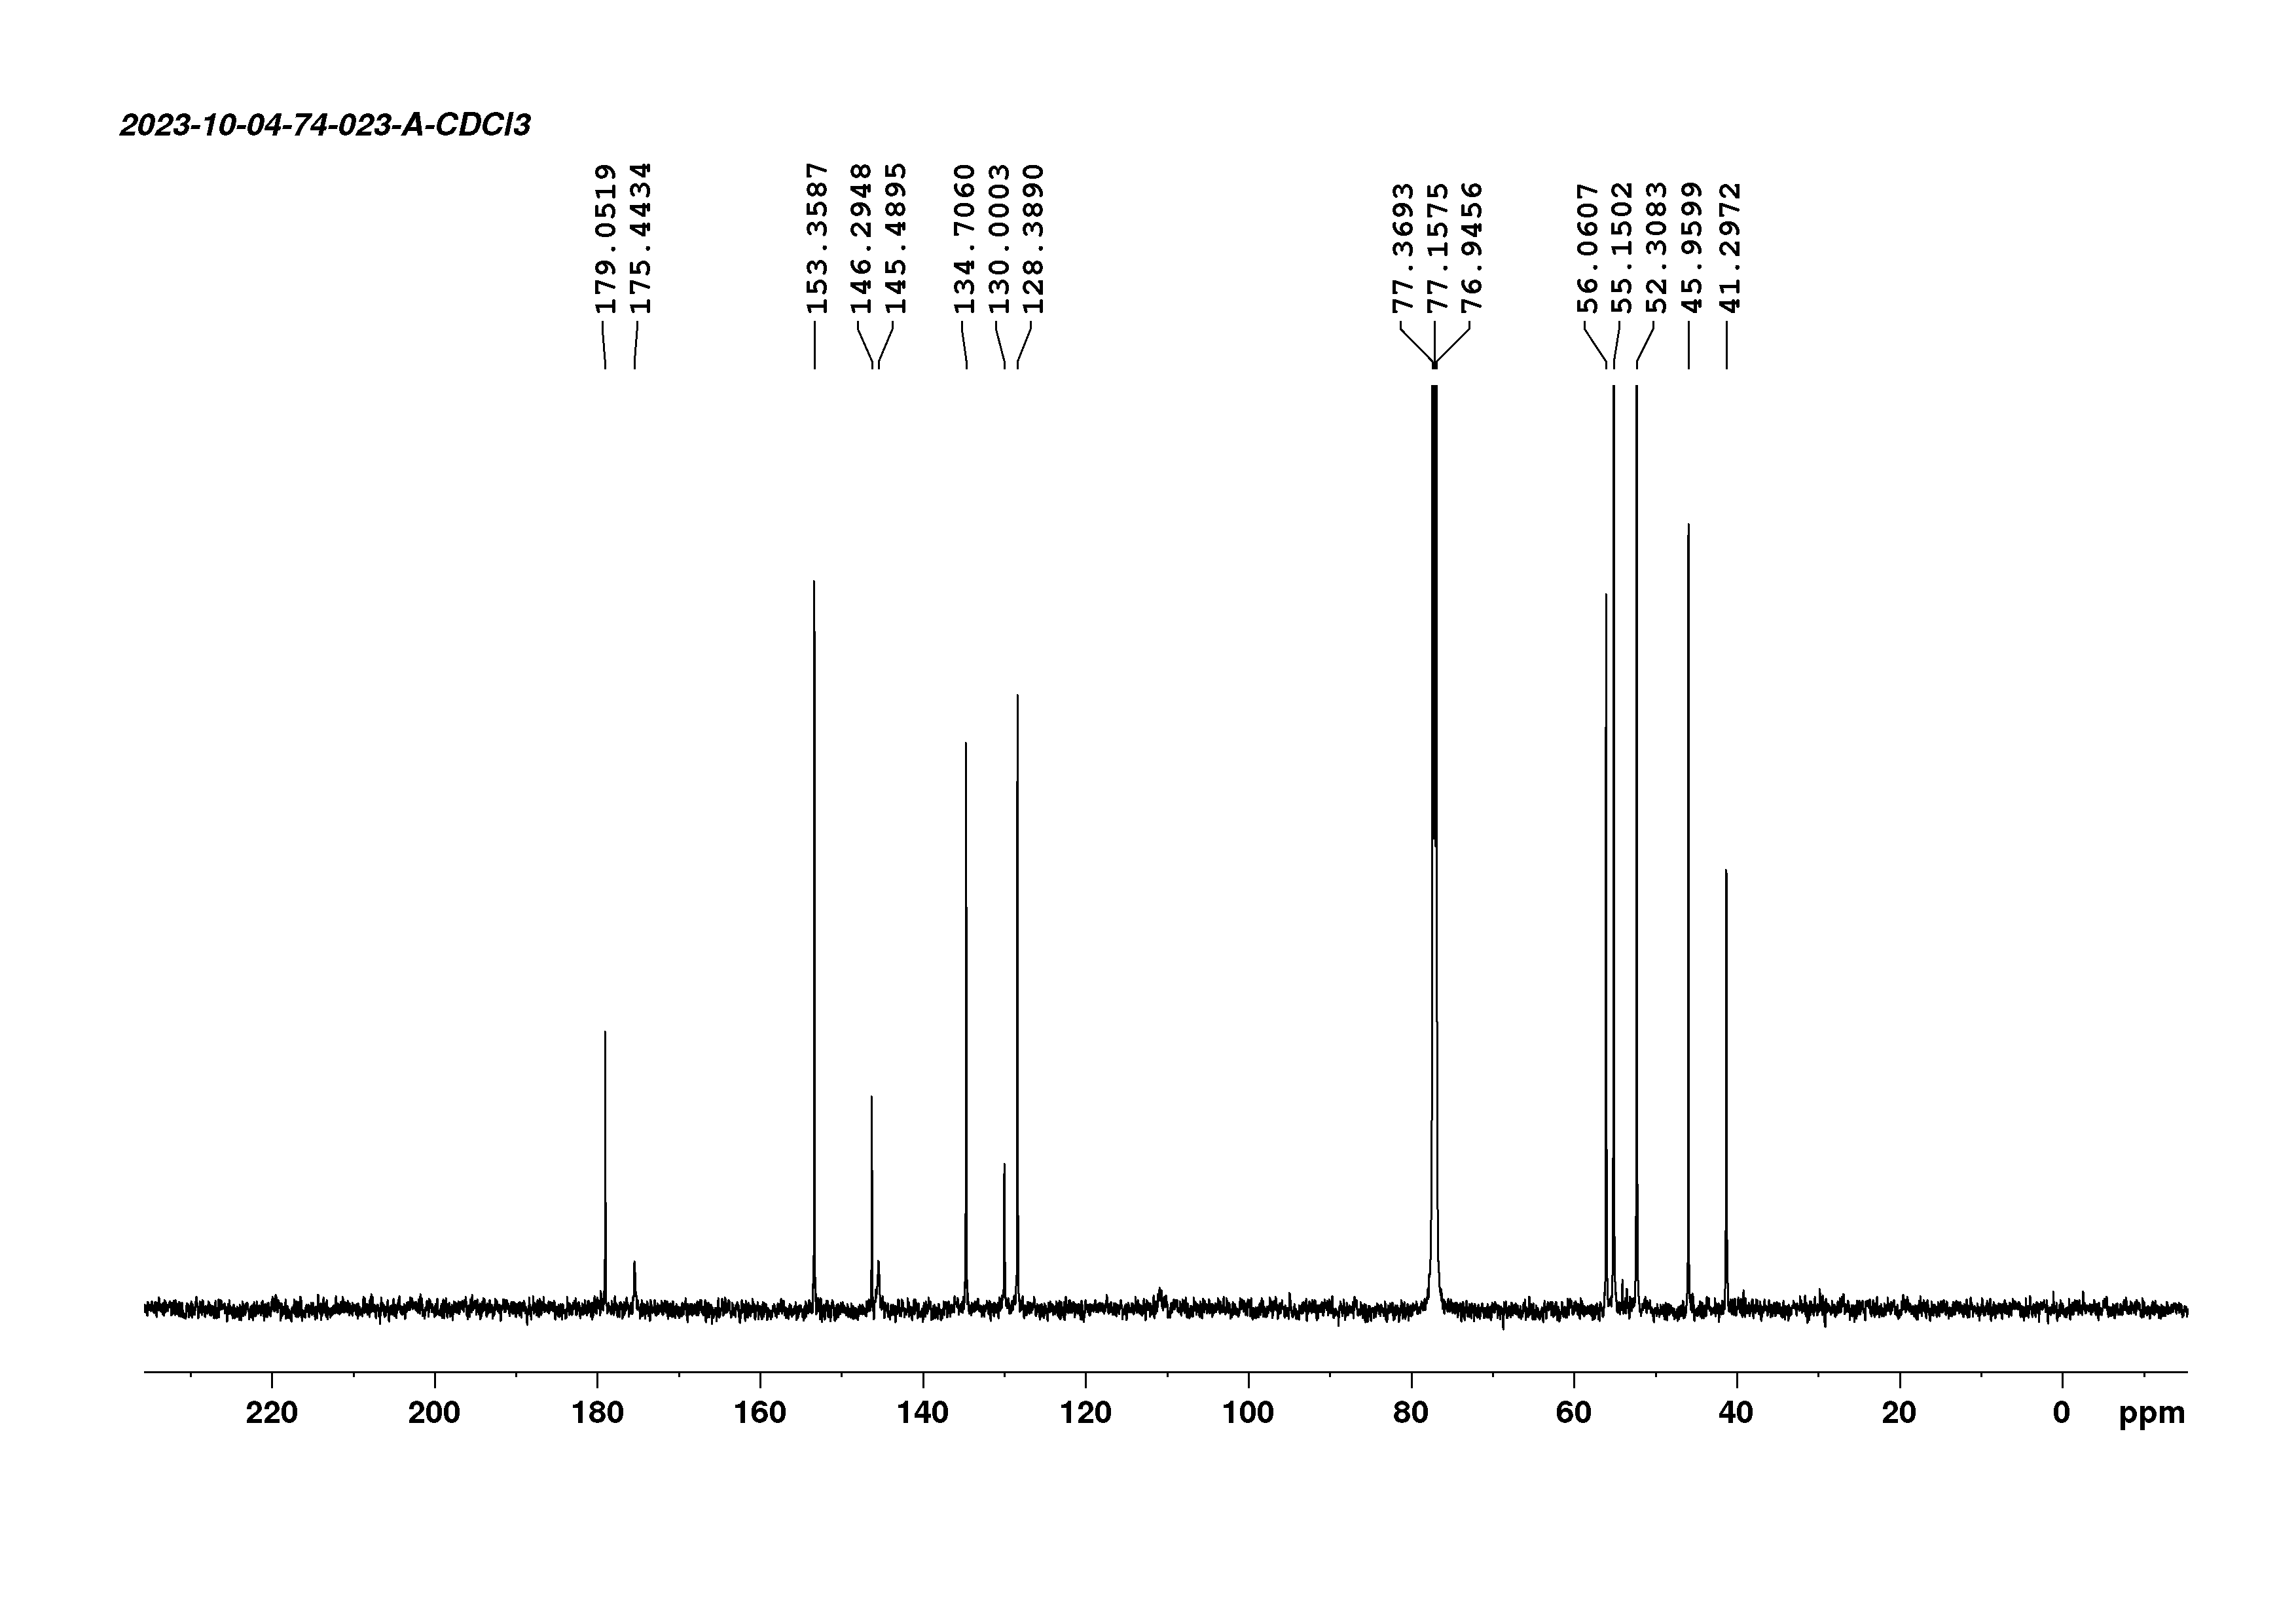


13C-NMR spectrum of compound **D7a**


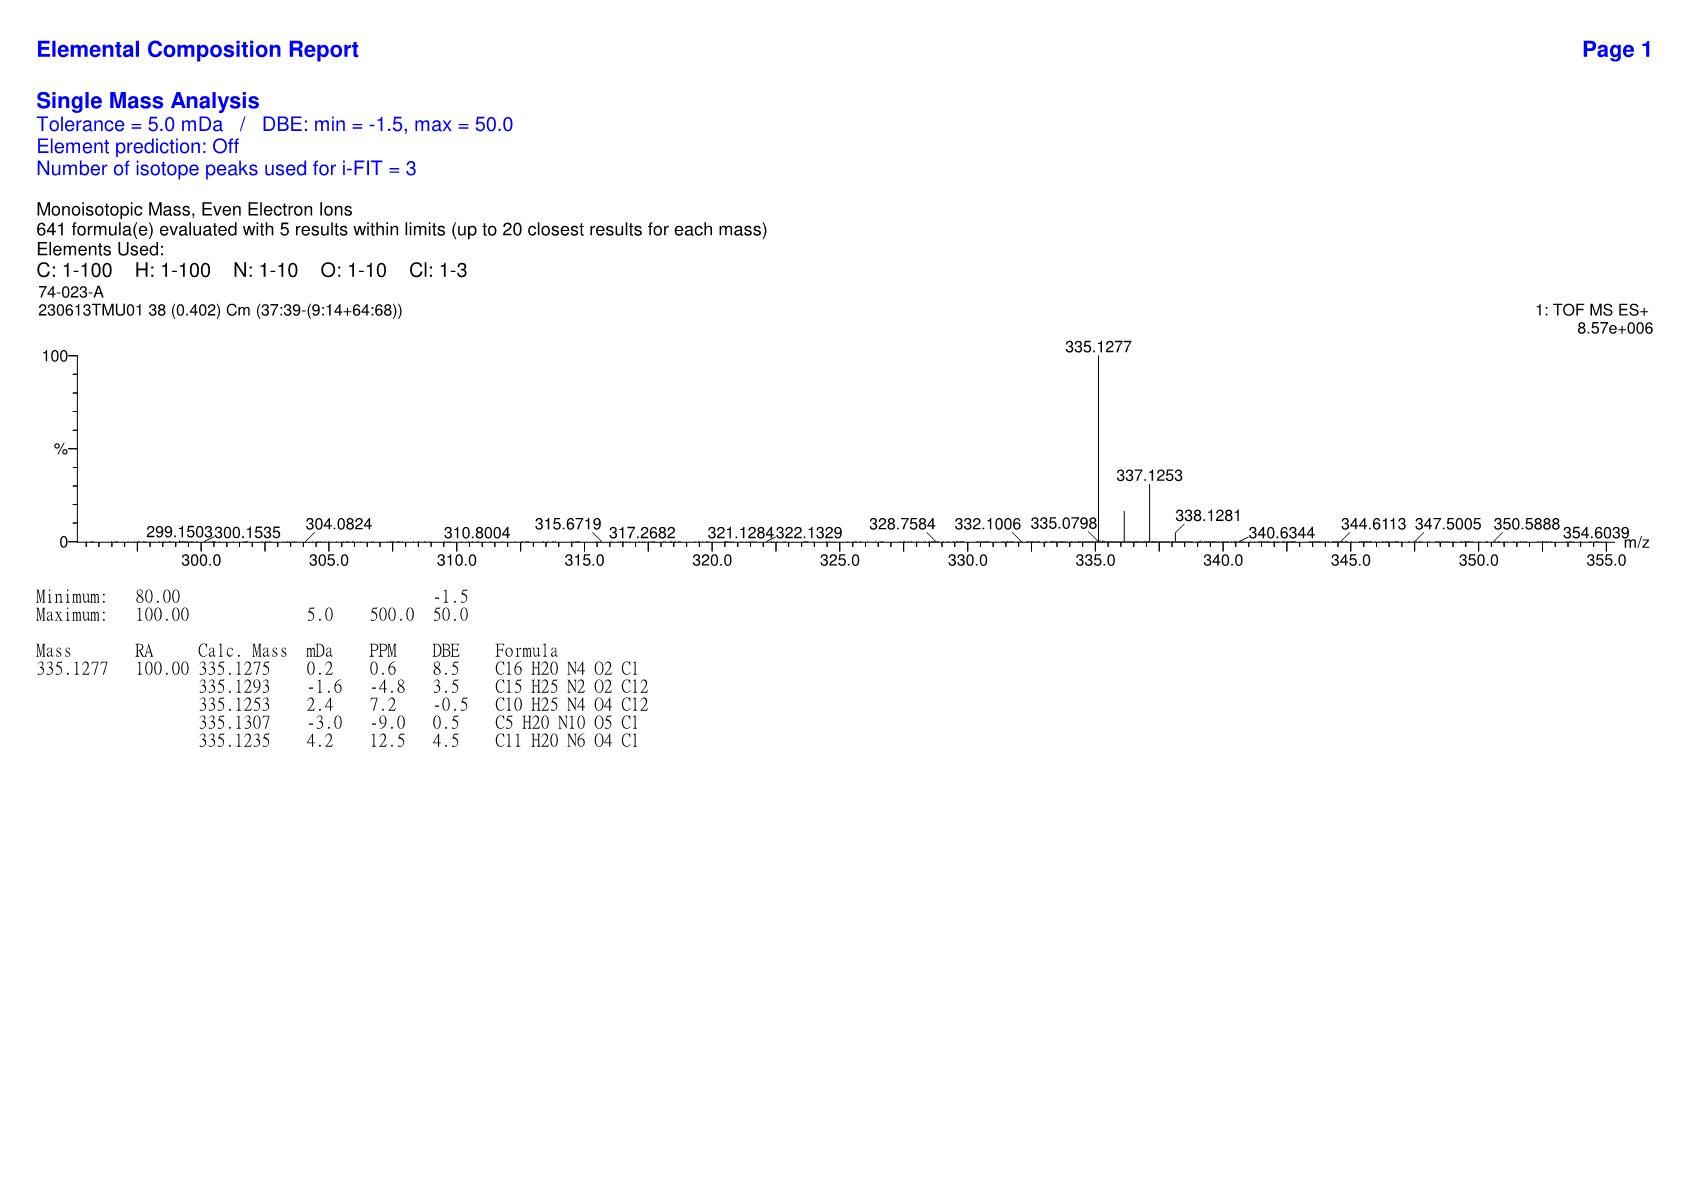


HRMS spectrum of compound **D7a**


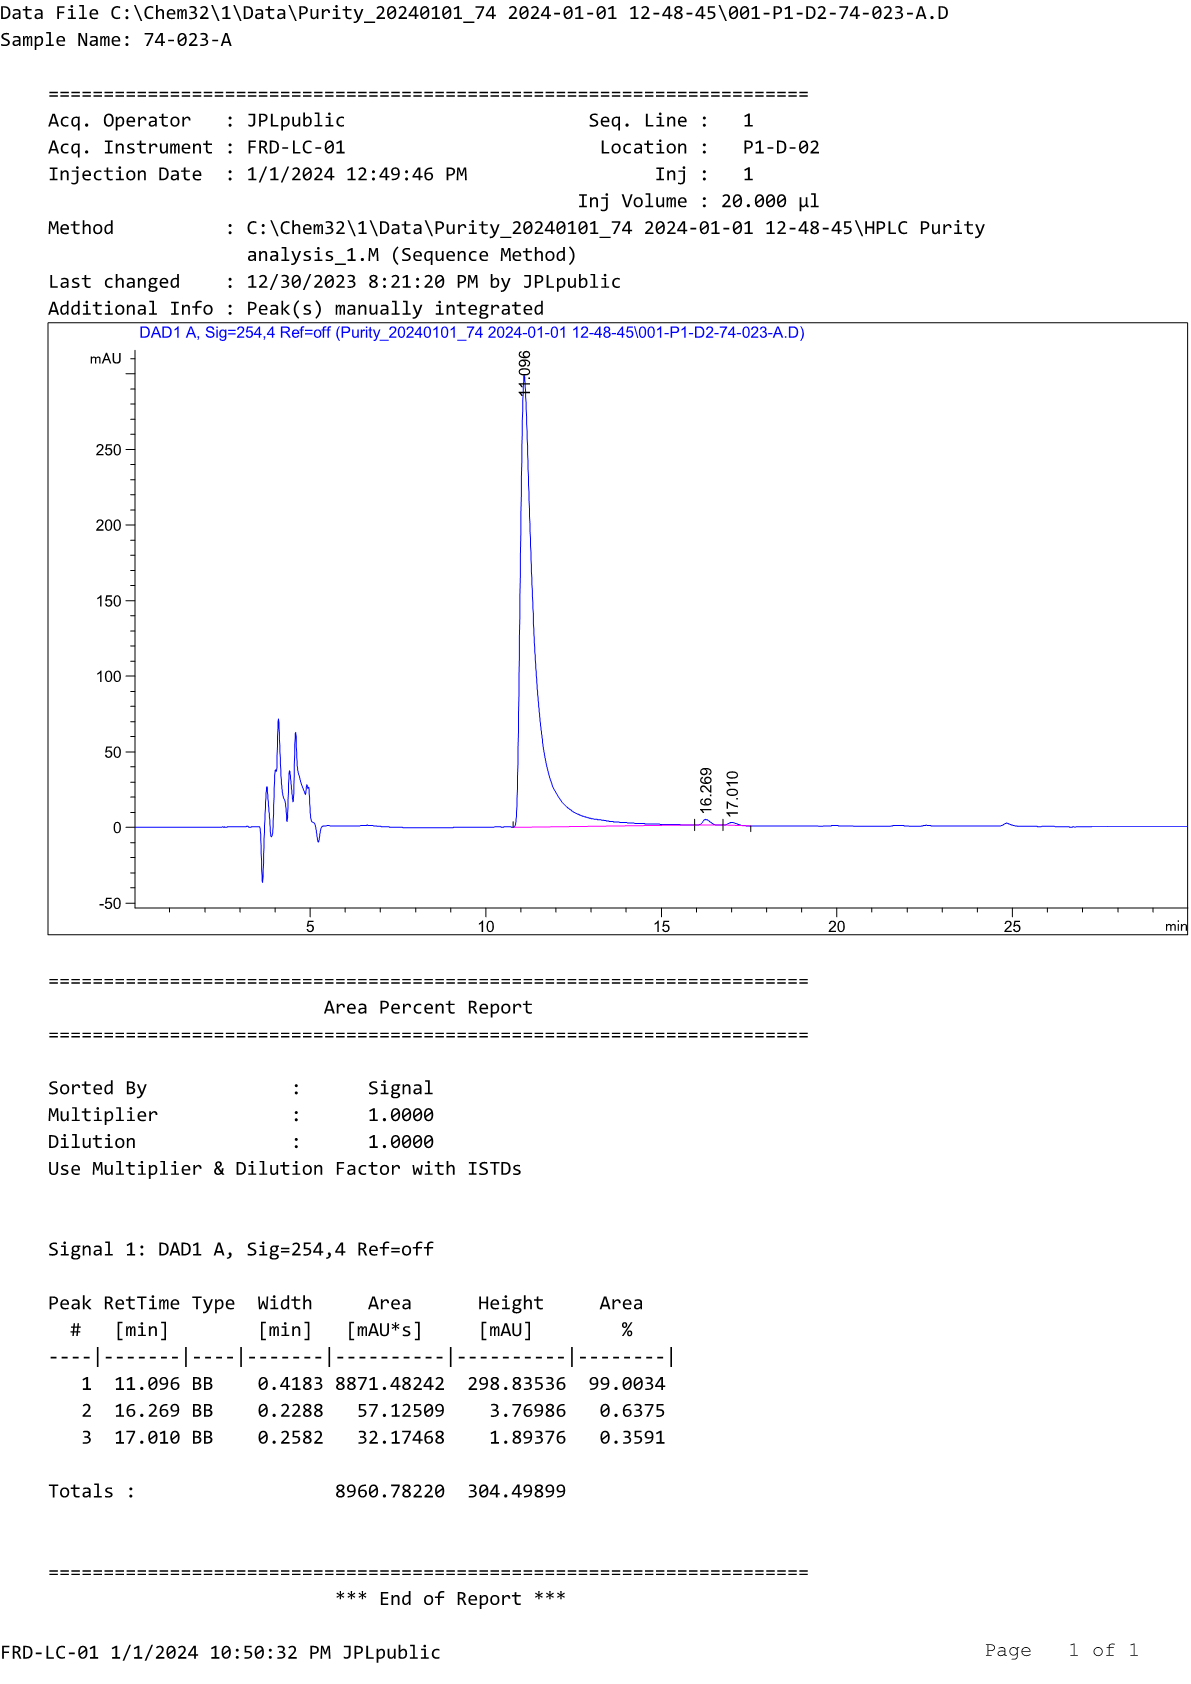


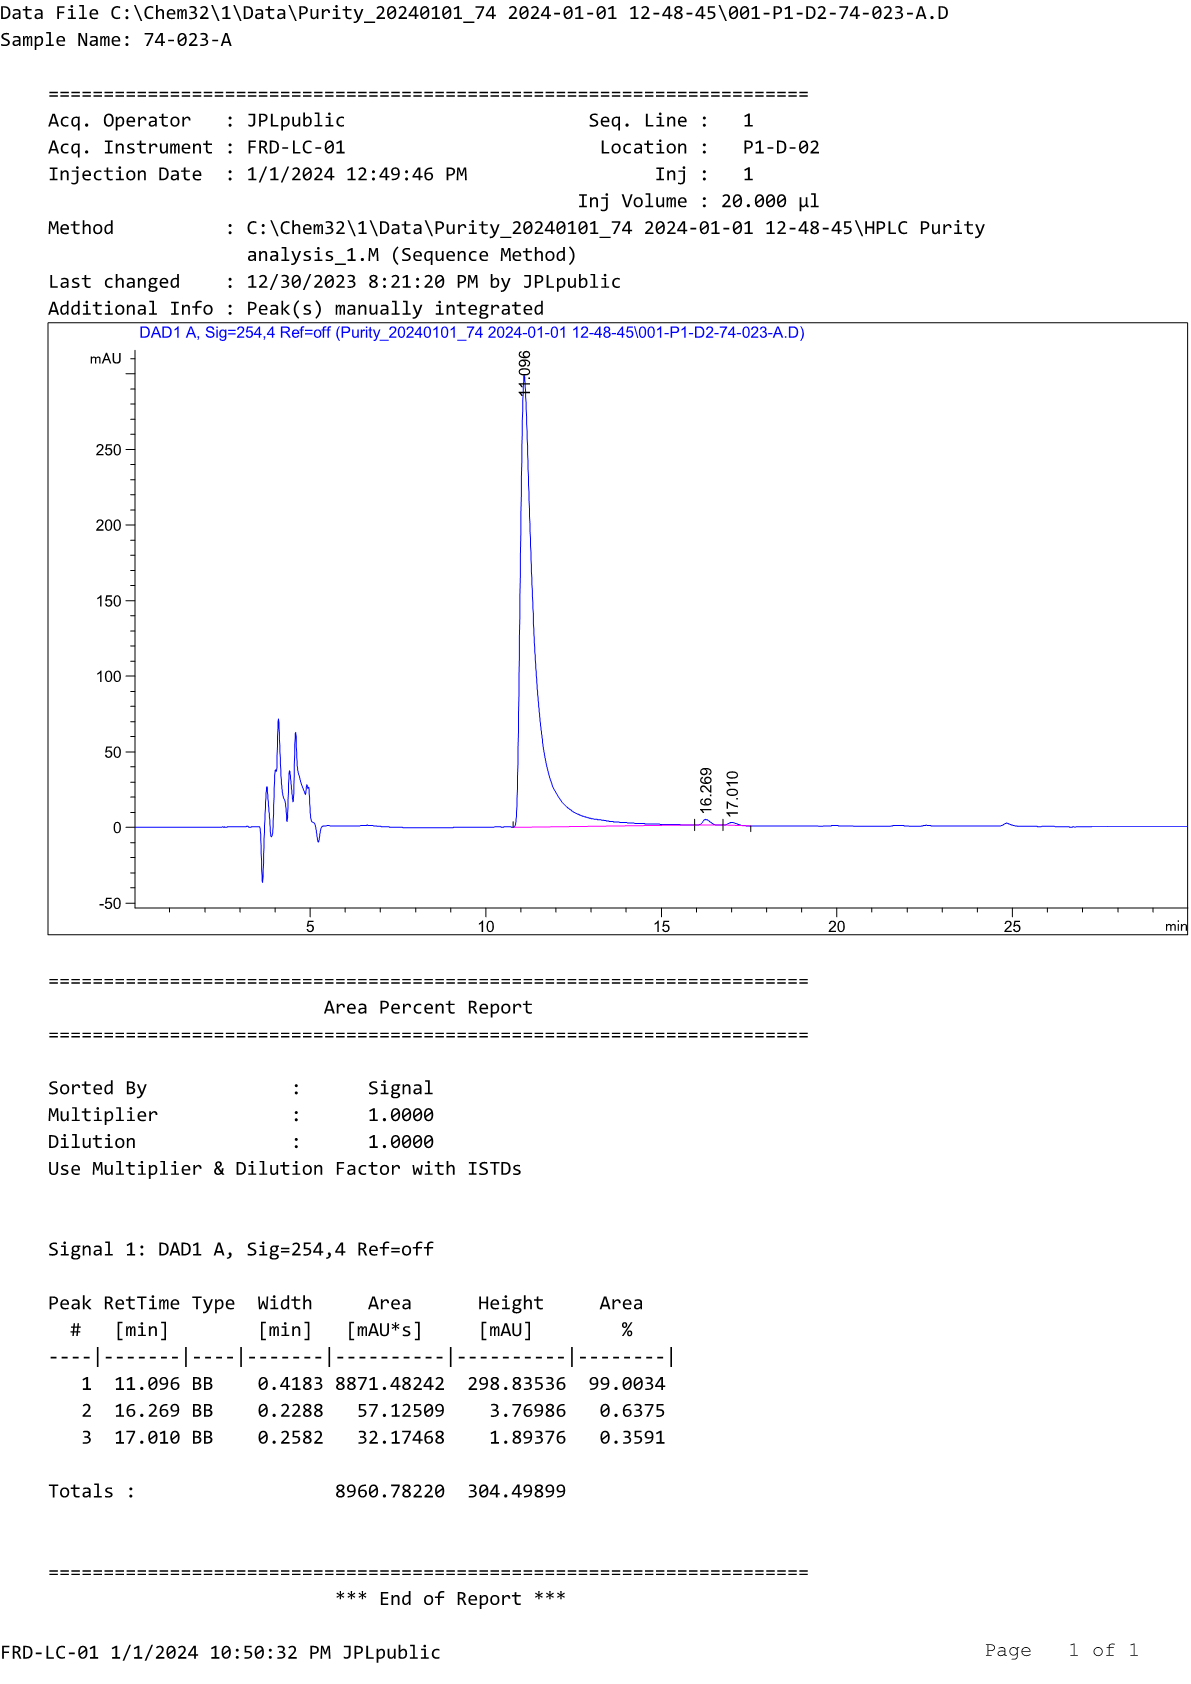


HPLC profile of compound **D7a**


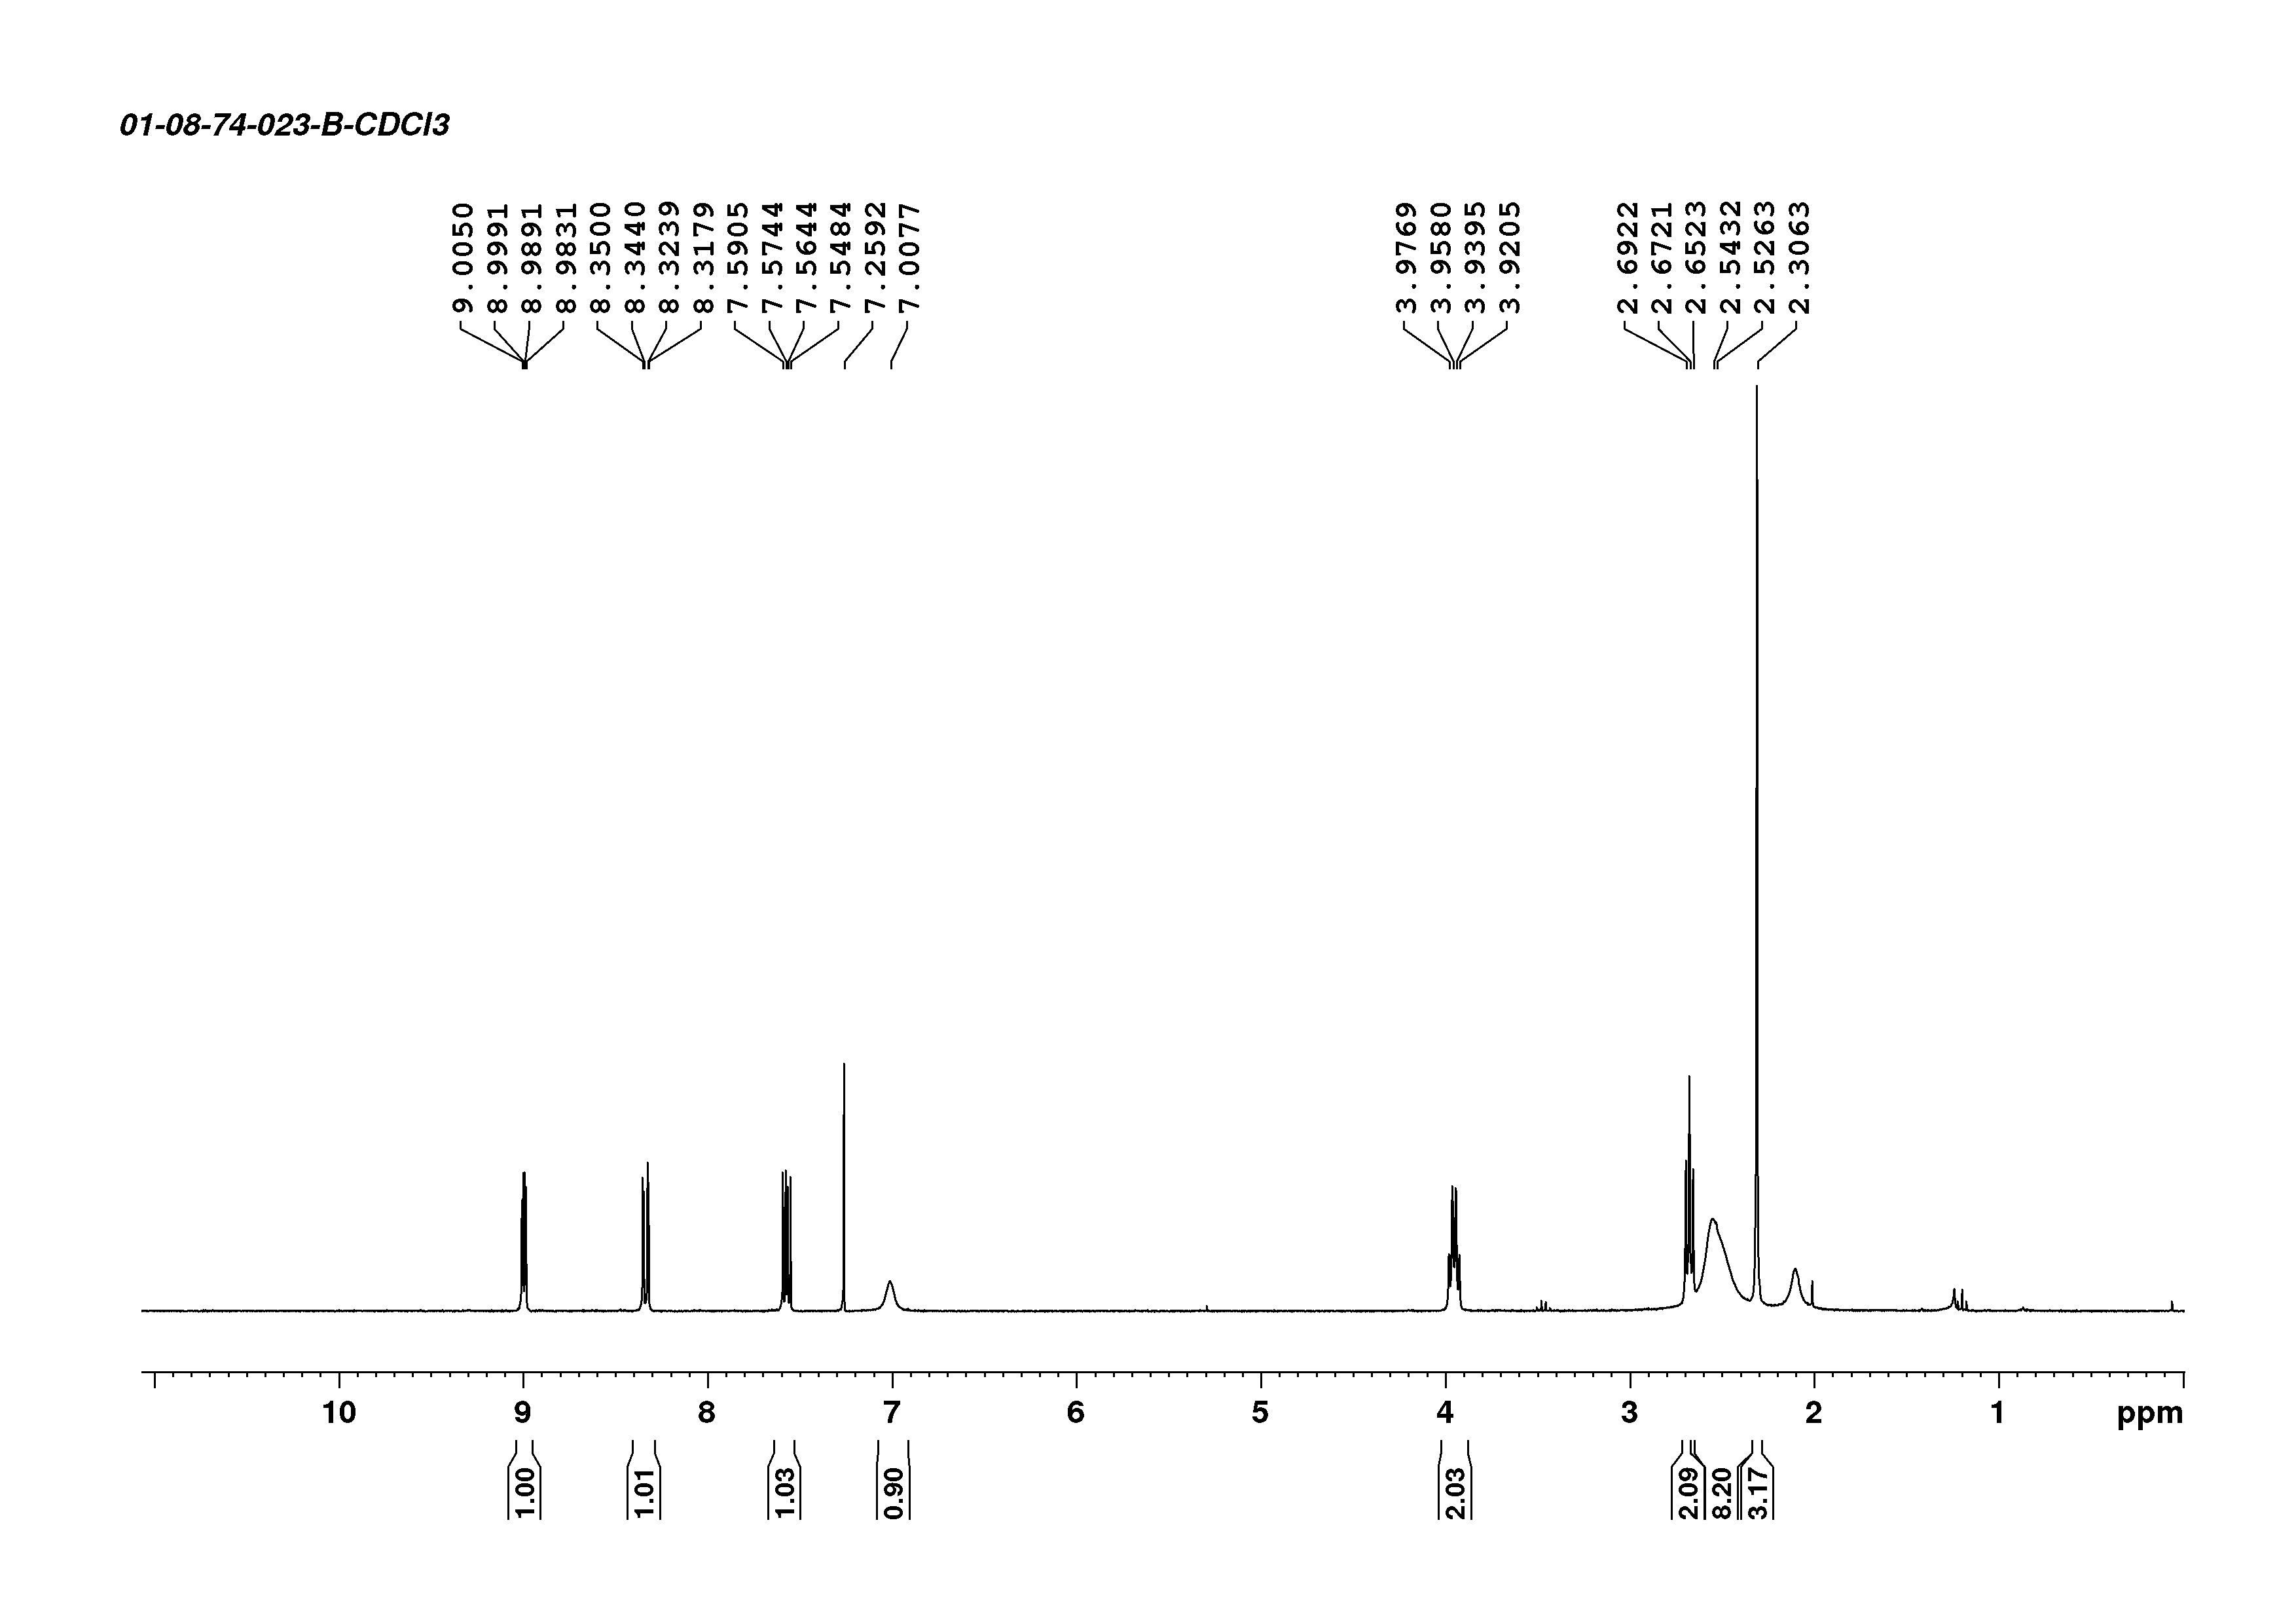


1H-NMR spectrum of compound **D7b**

**
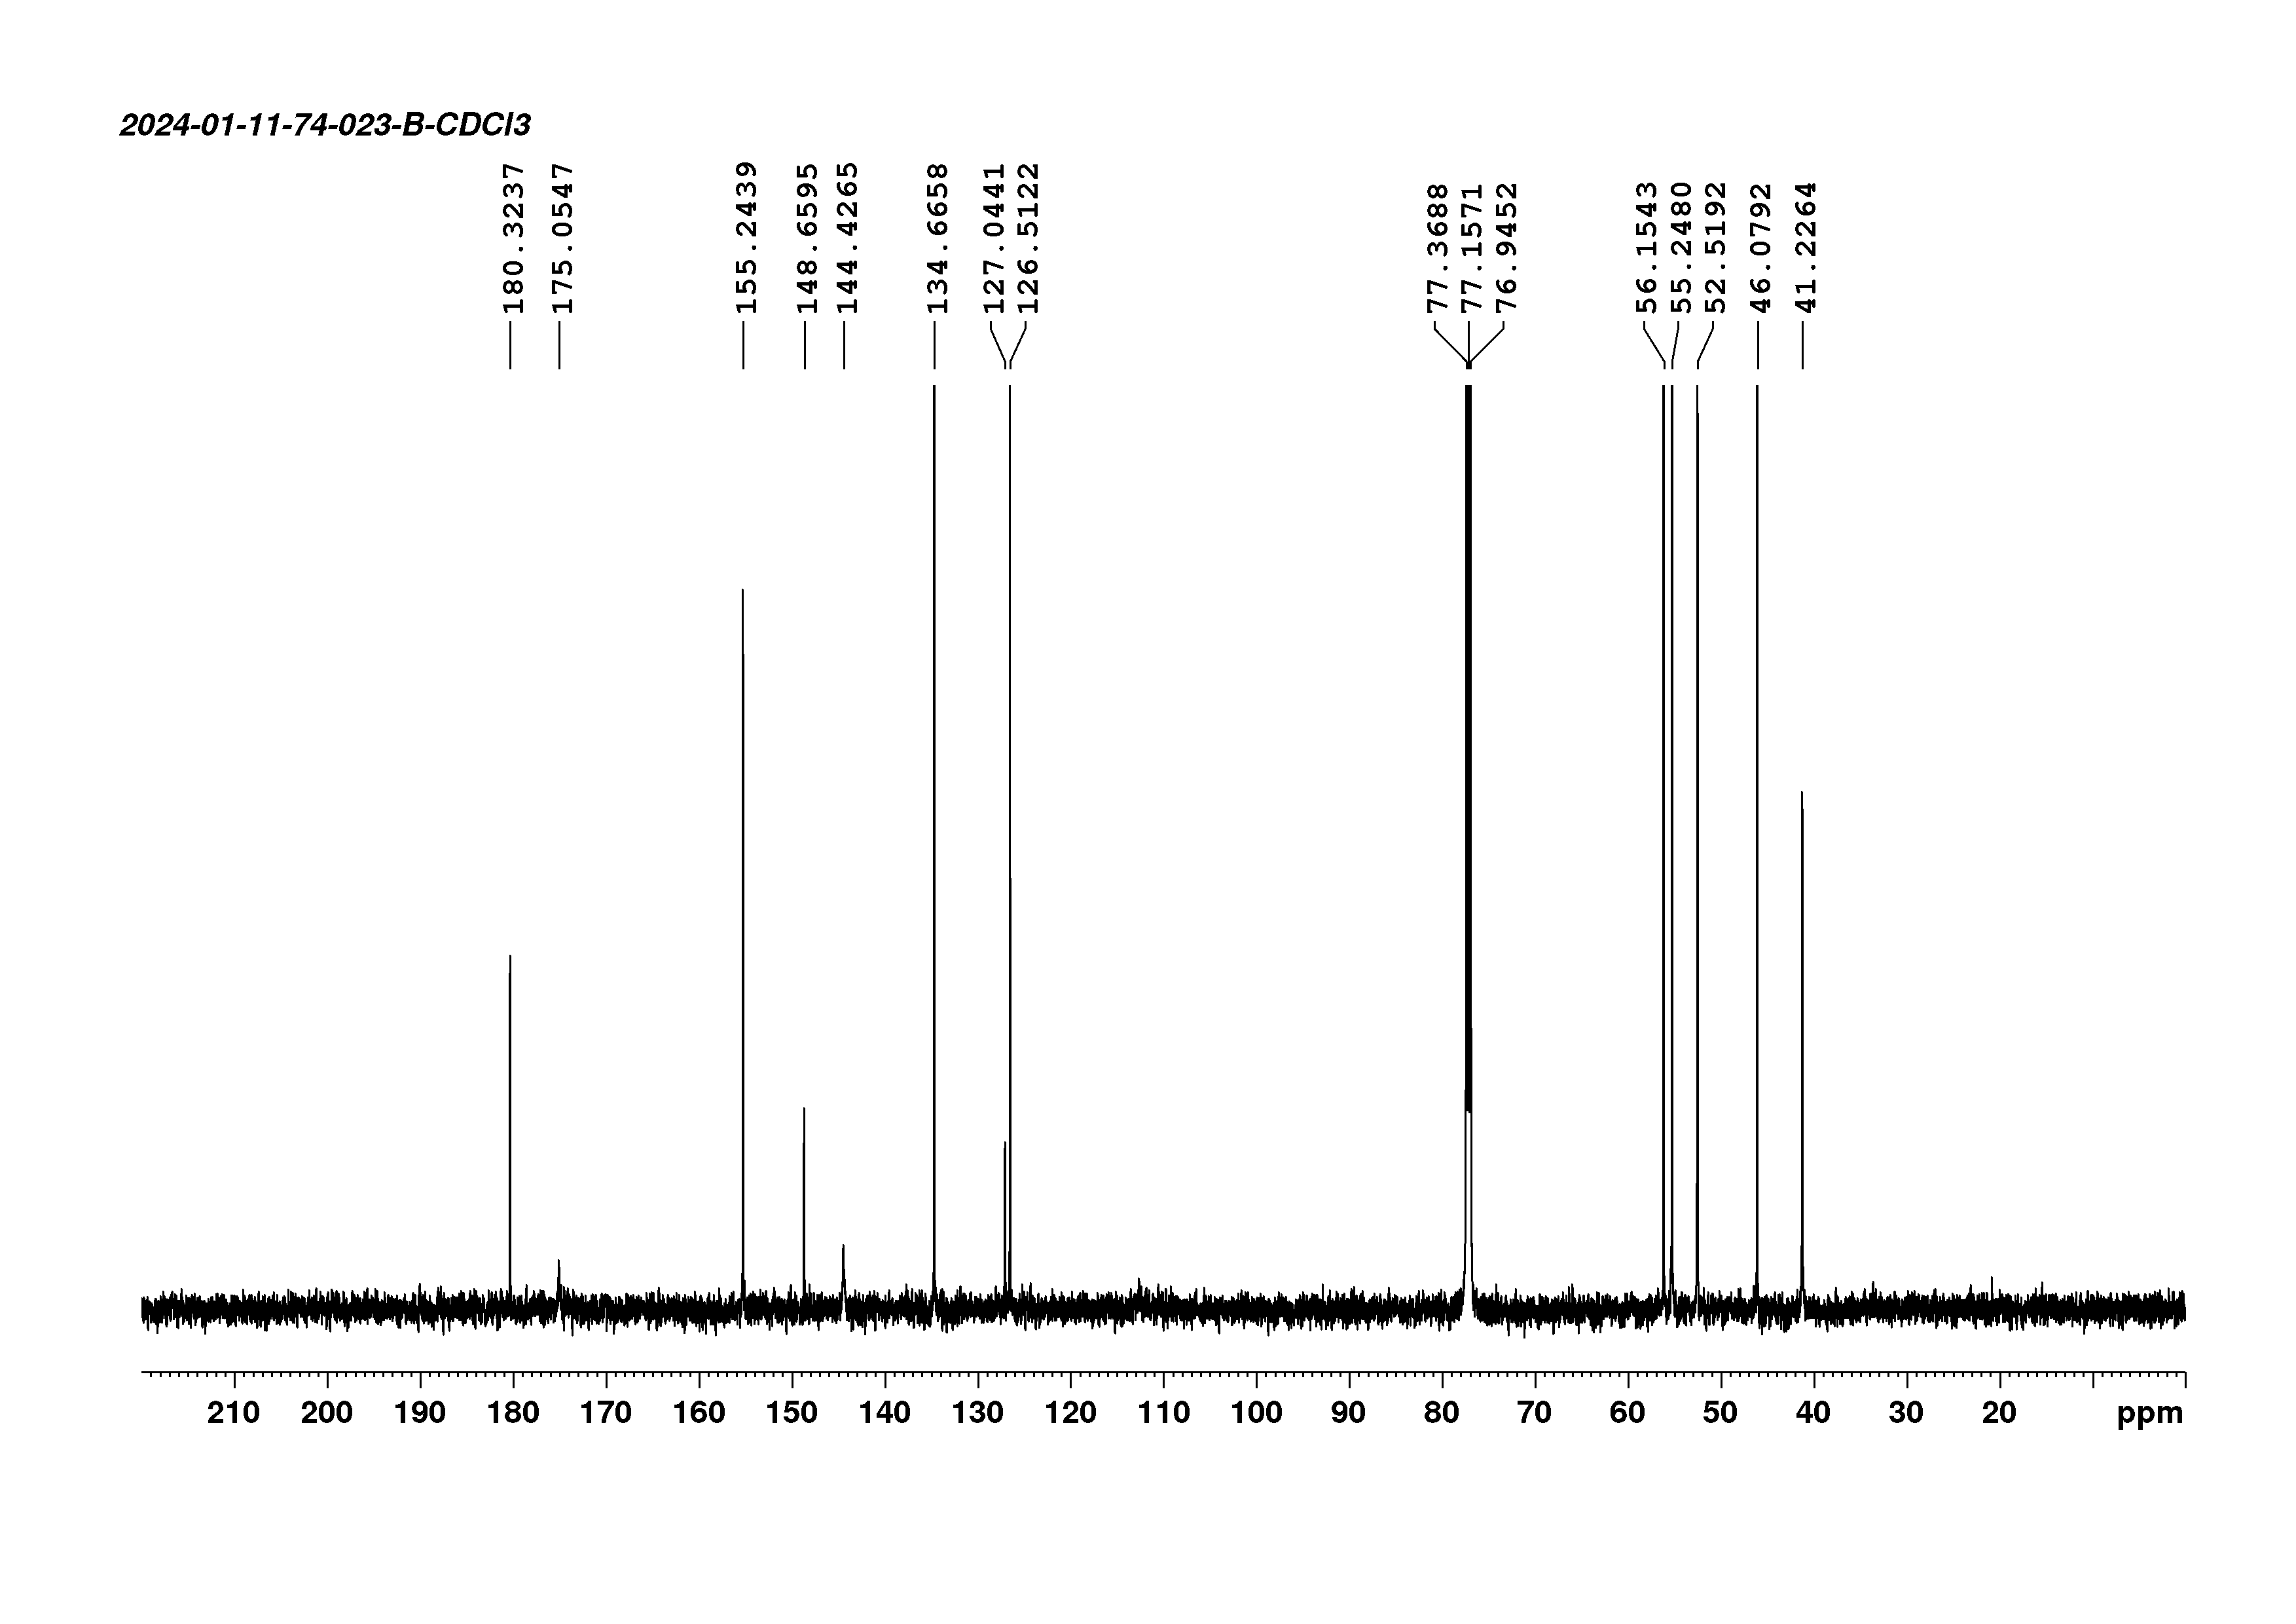
**

13C-NMR spectrum of compound **D7b**

**
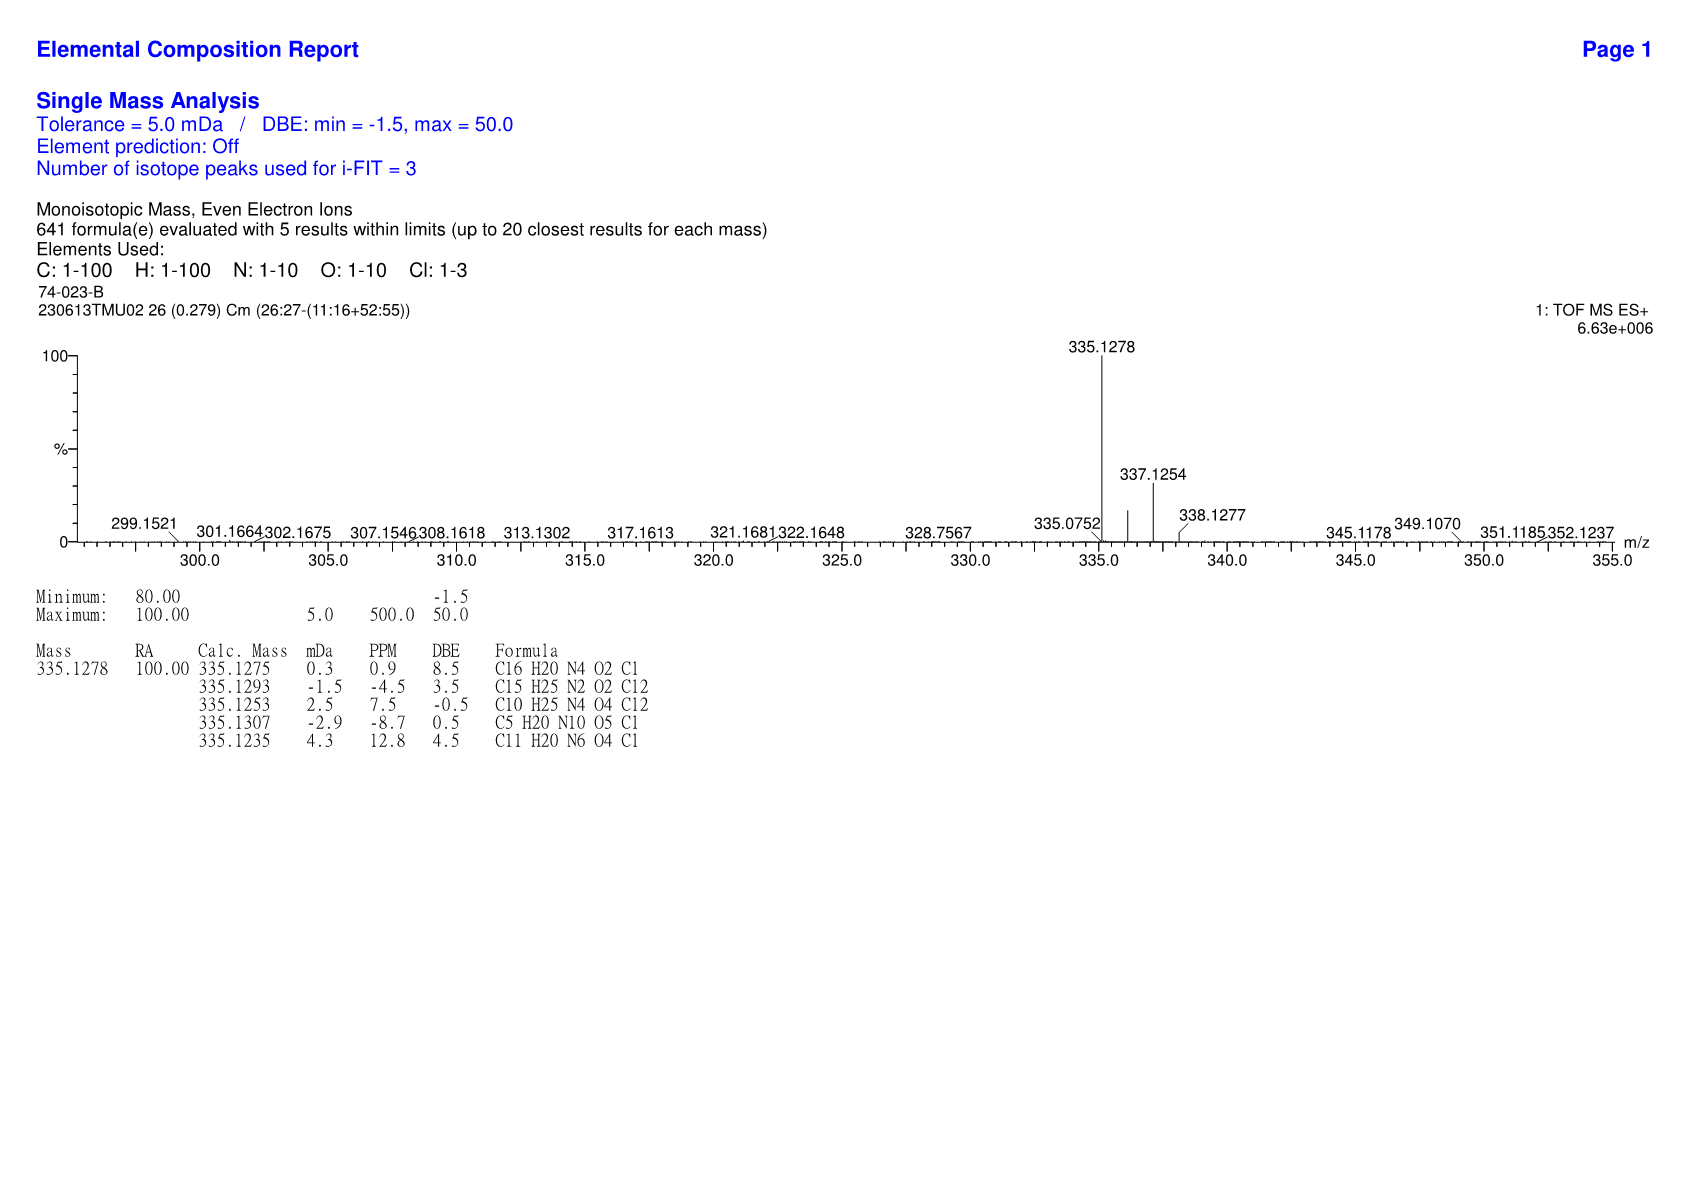
**

HRMS spectrum of compound **D7b**


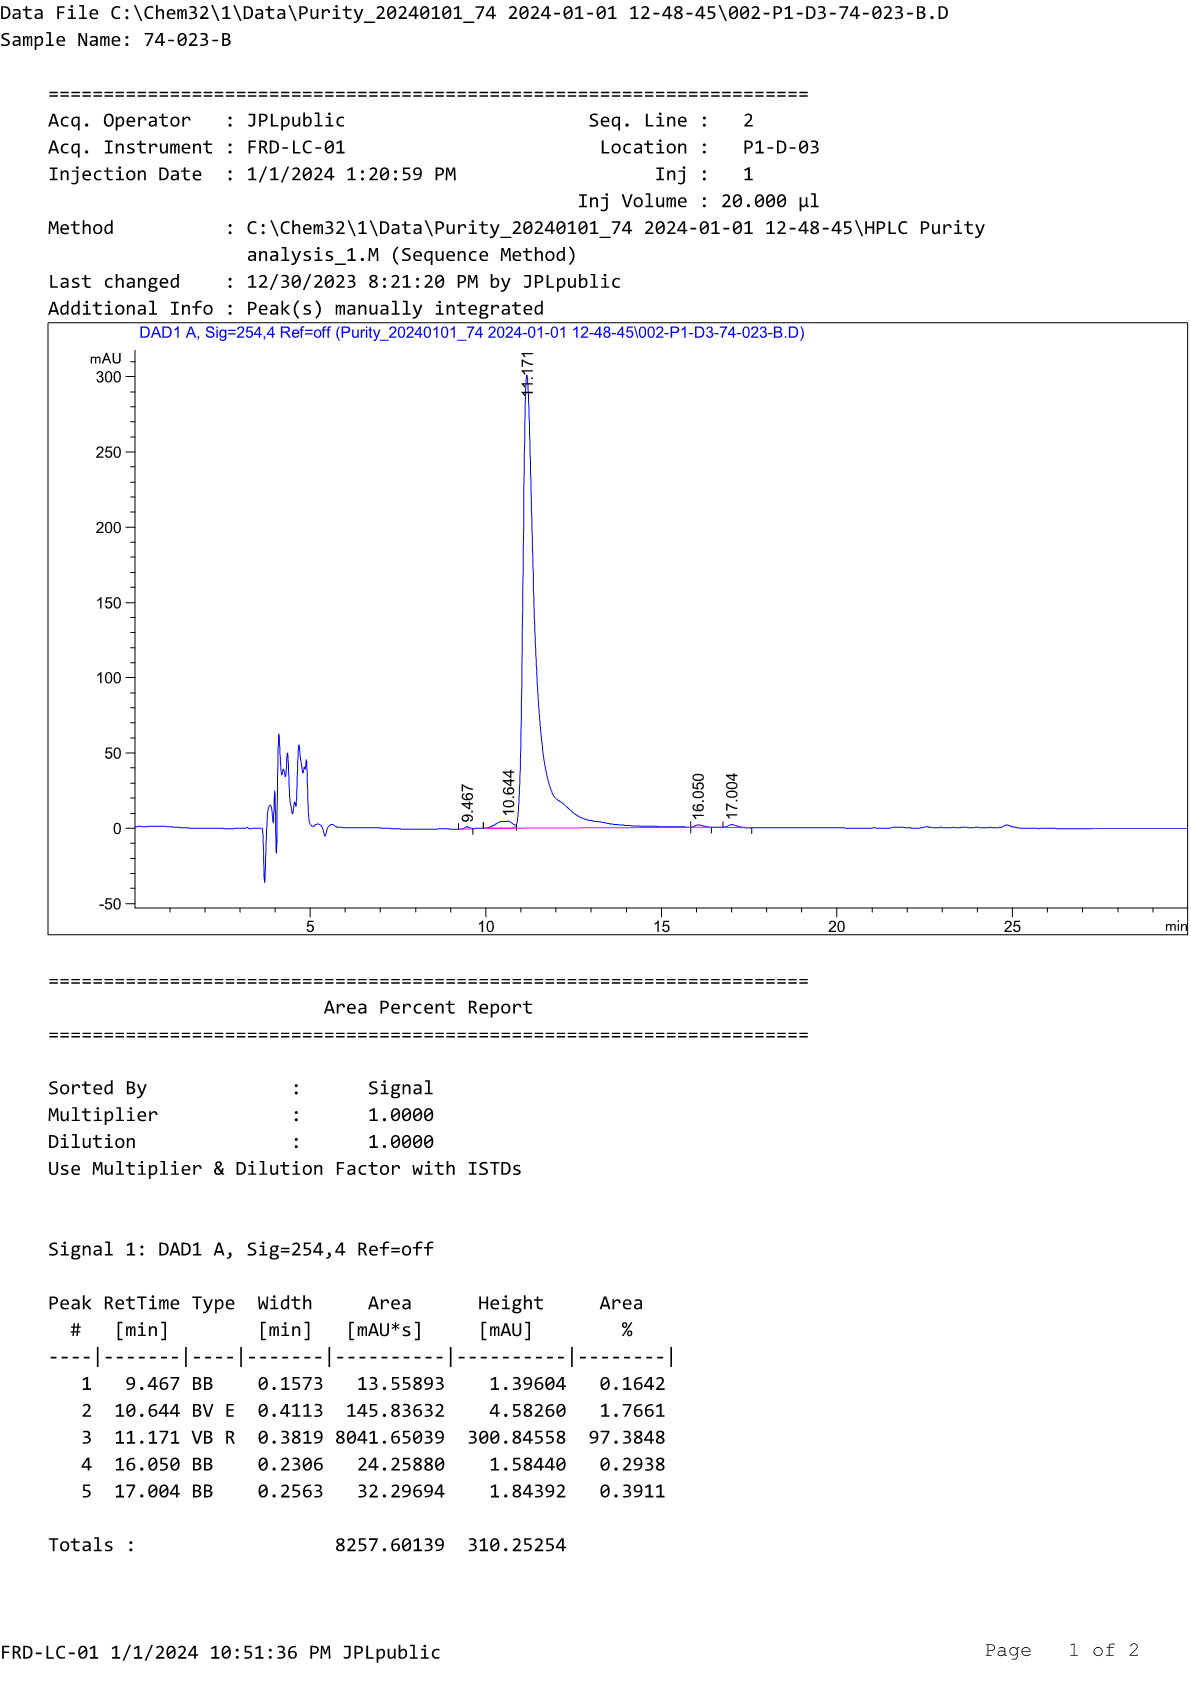


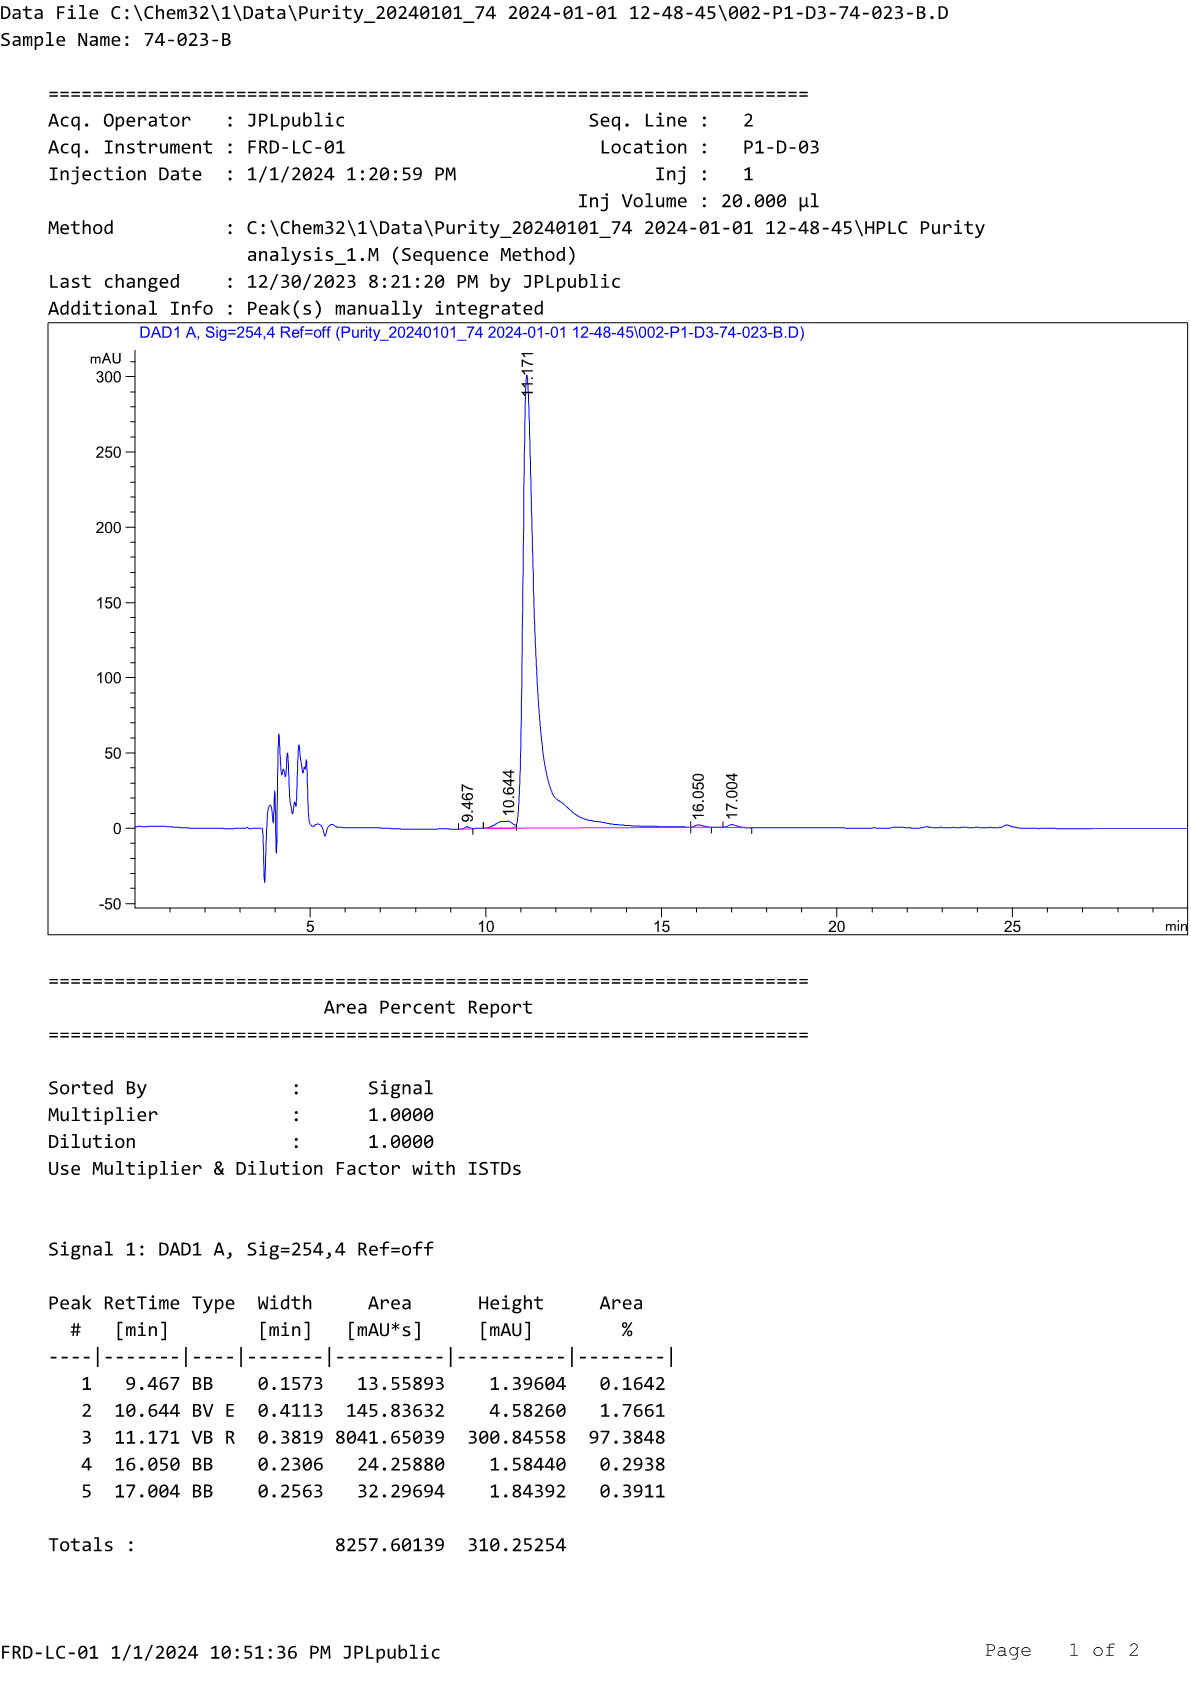


HPLC profile of compound **D7b**


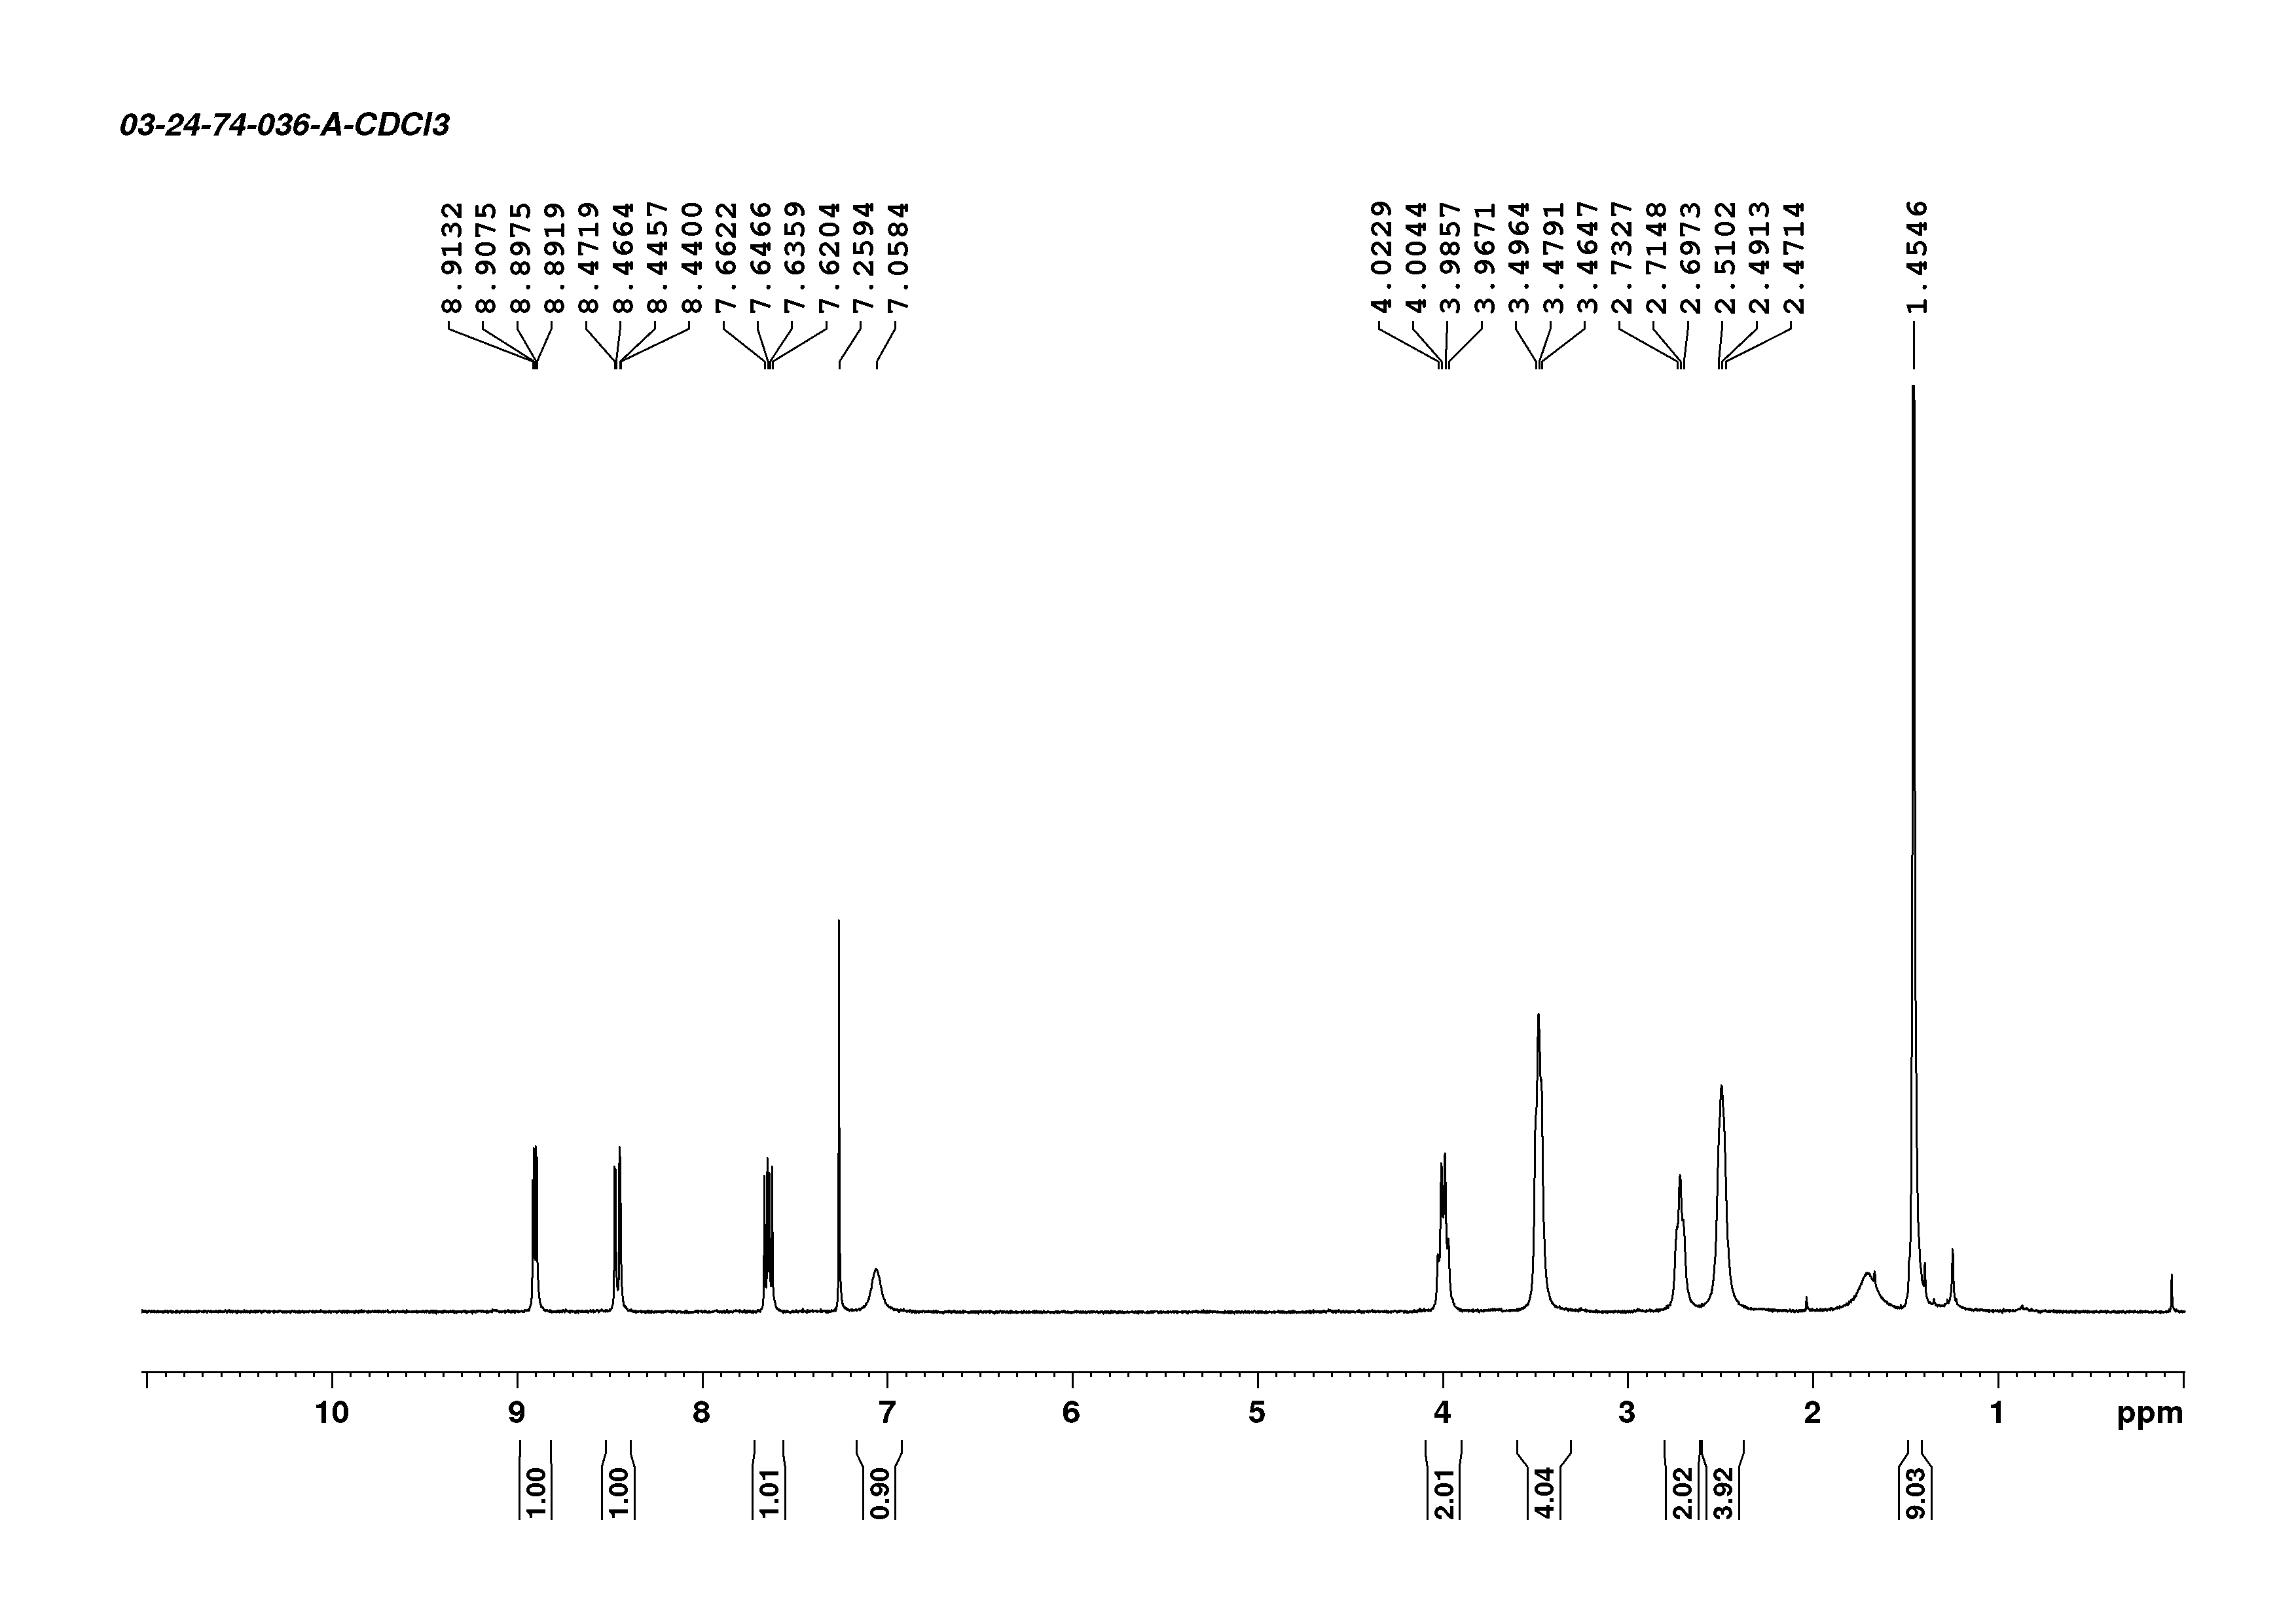


1H-NMR spectrum of compound **D8a**


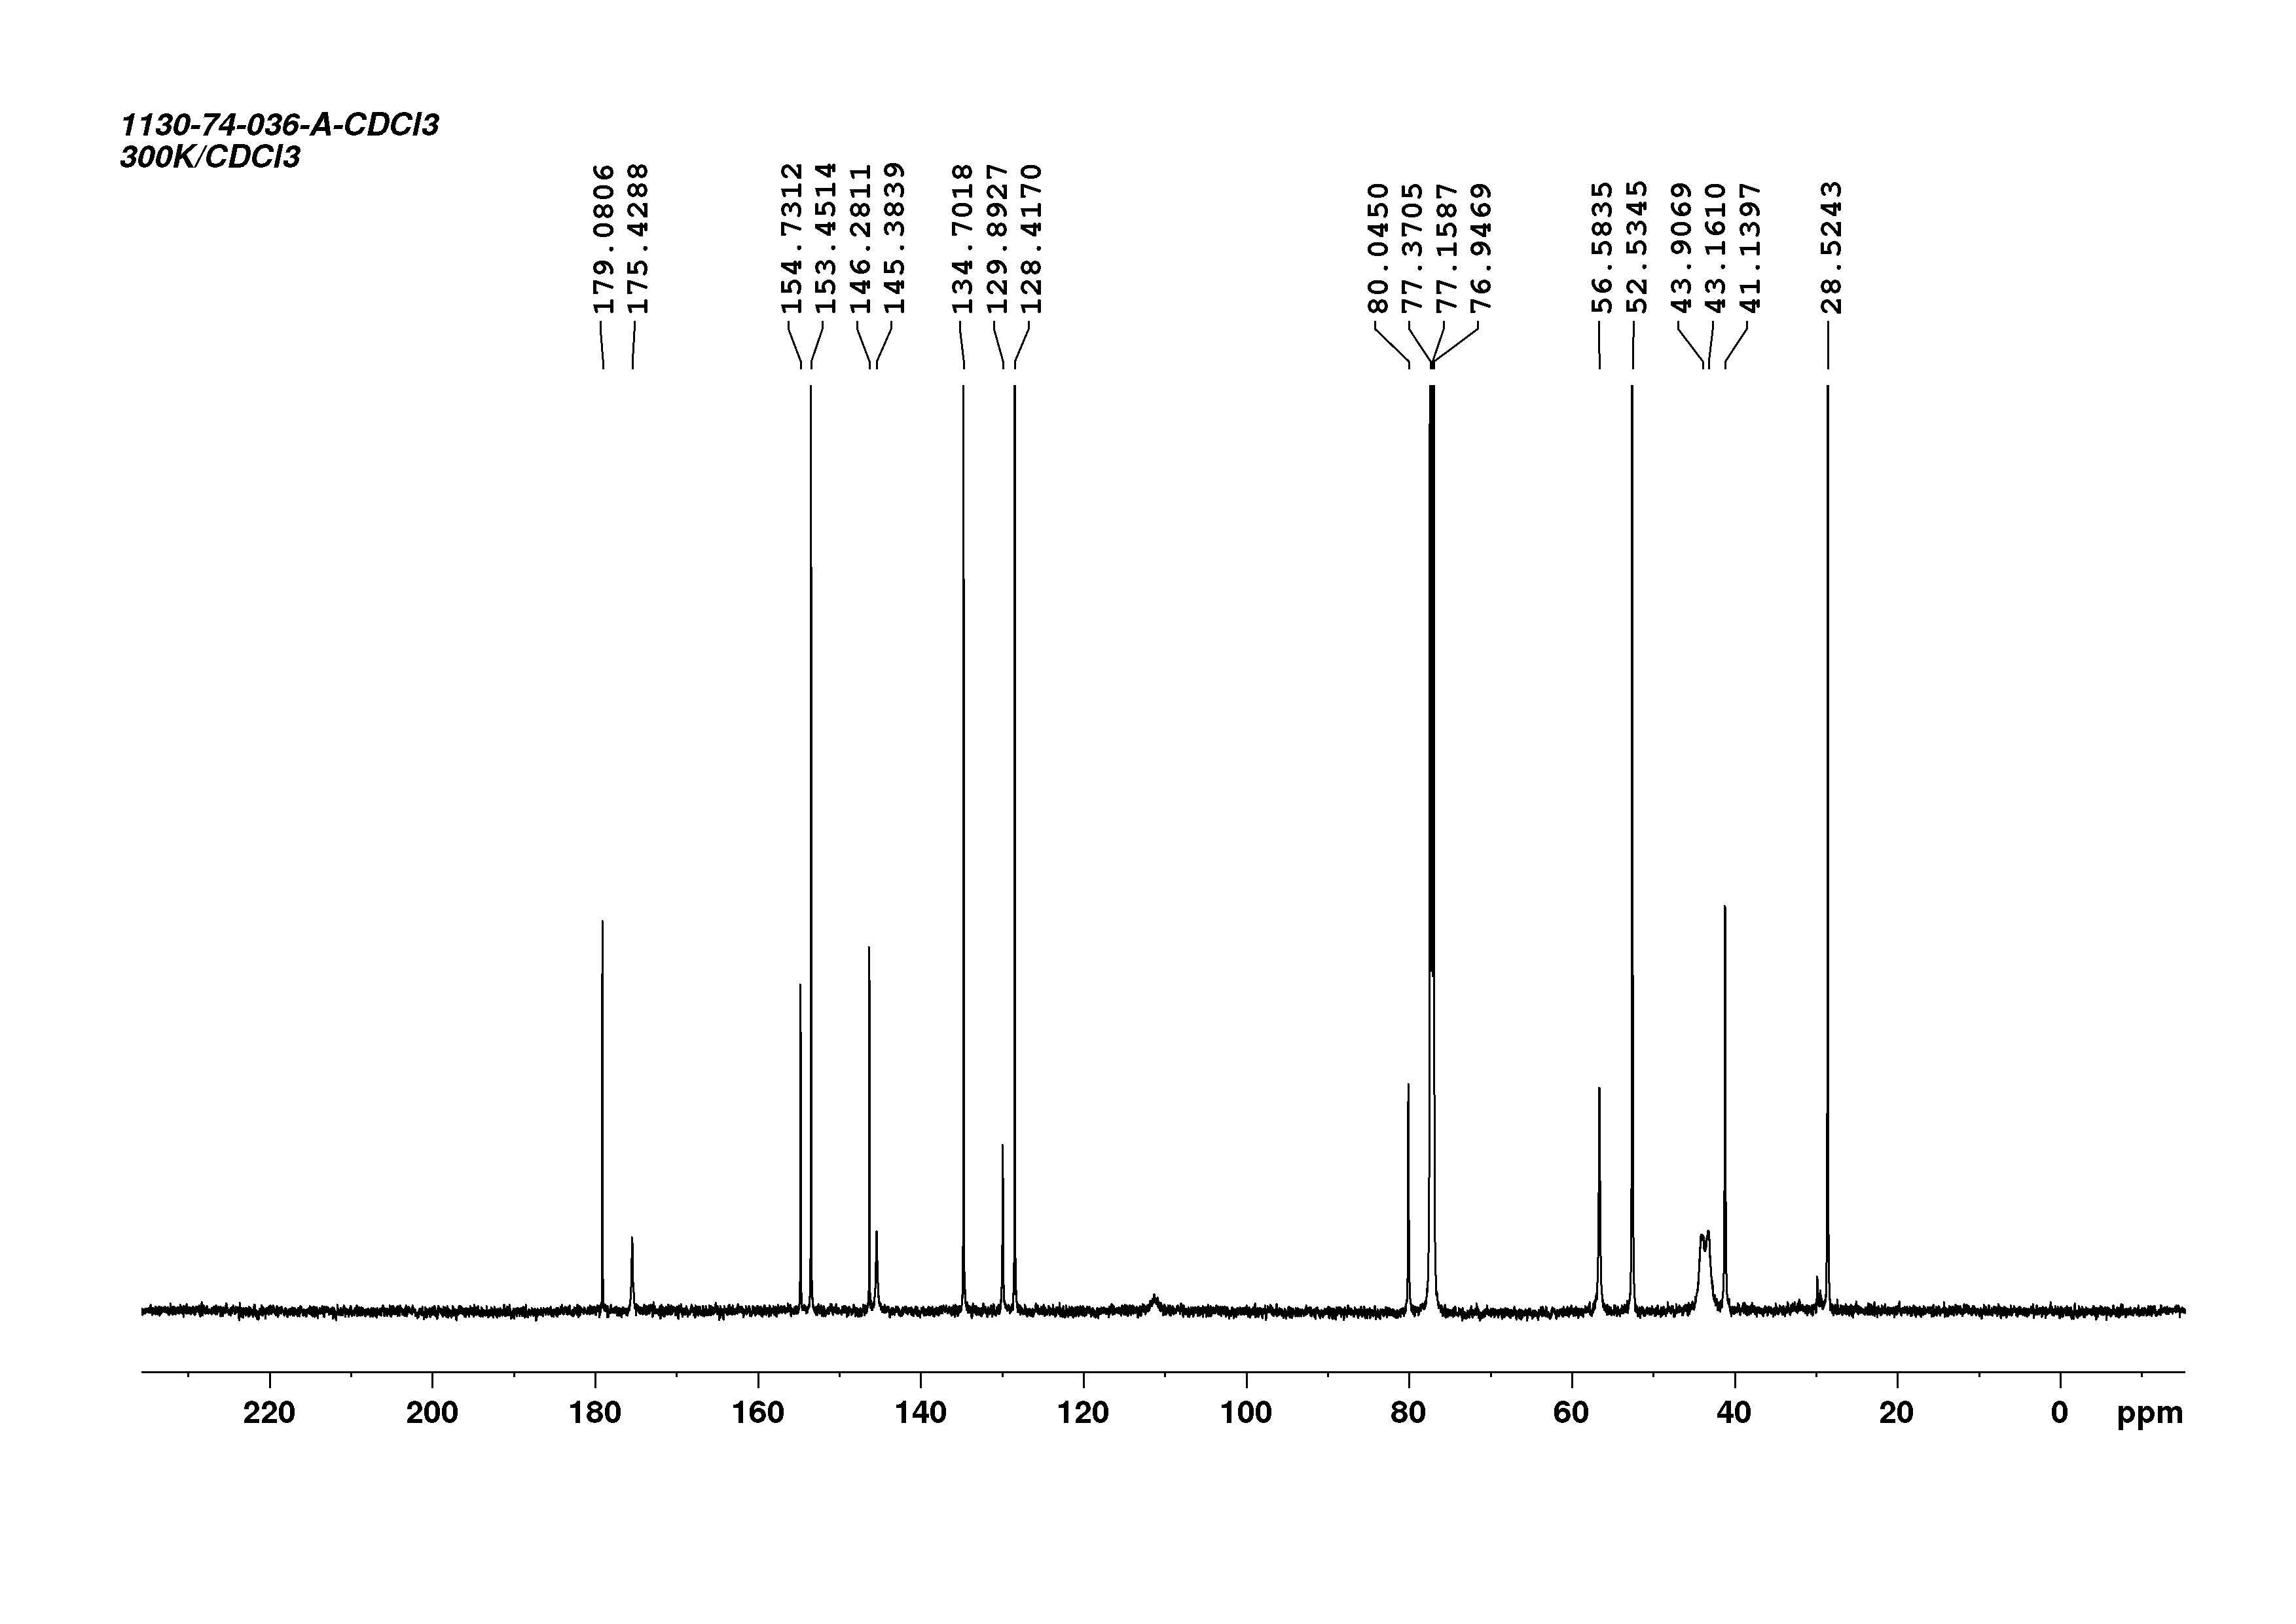


13C-NMR spectrum of compound **D8a**

**
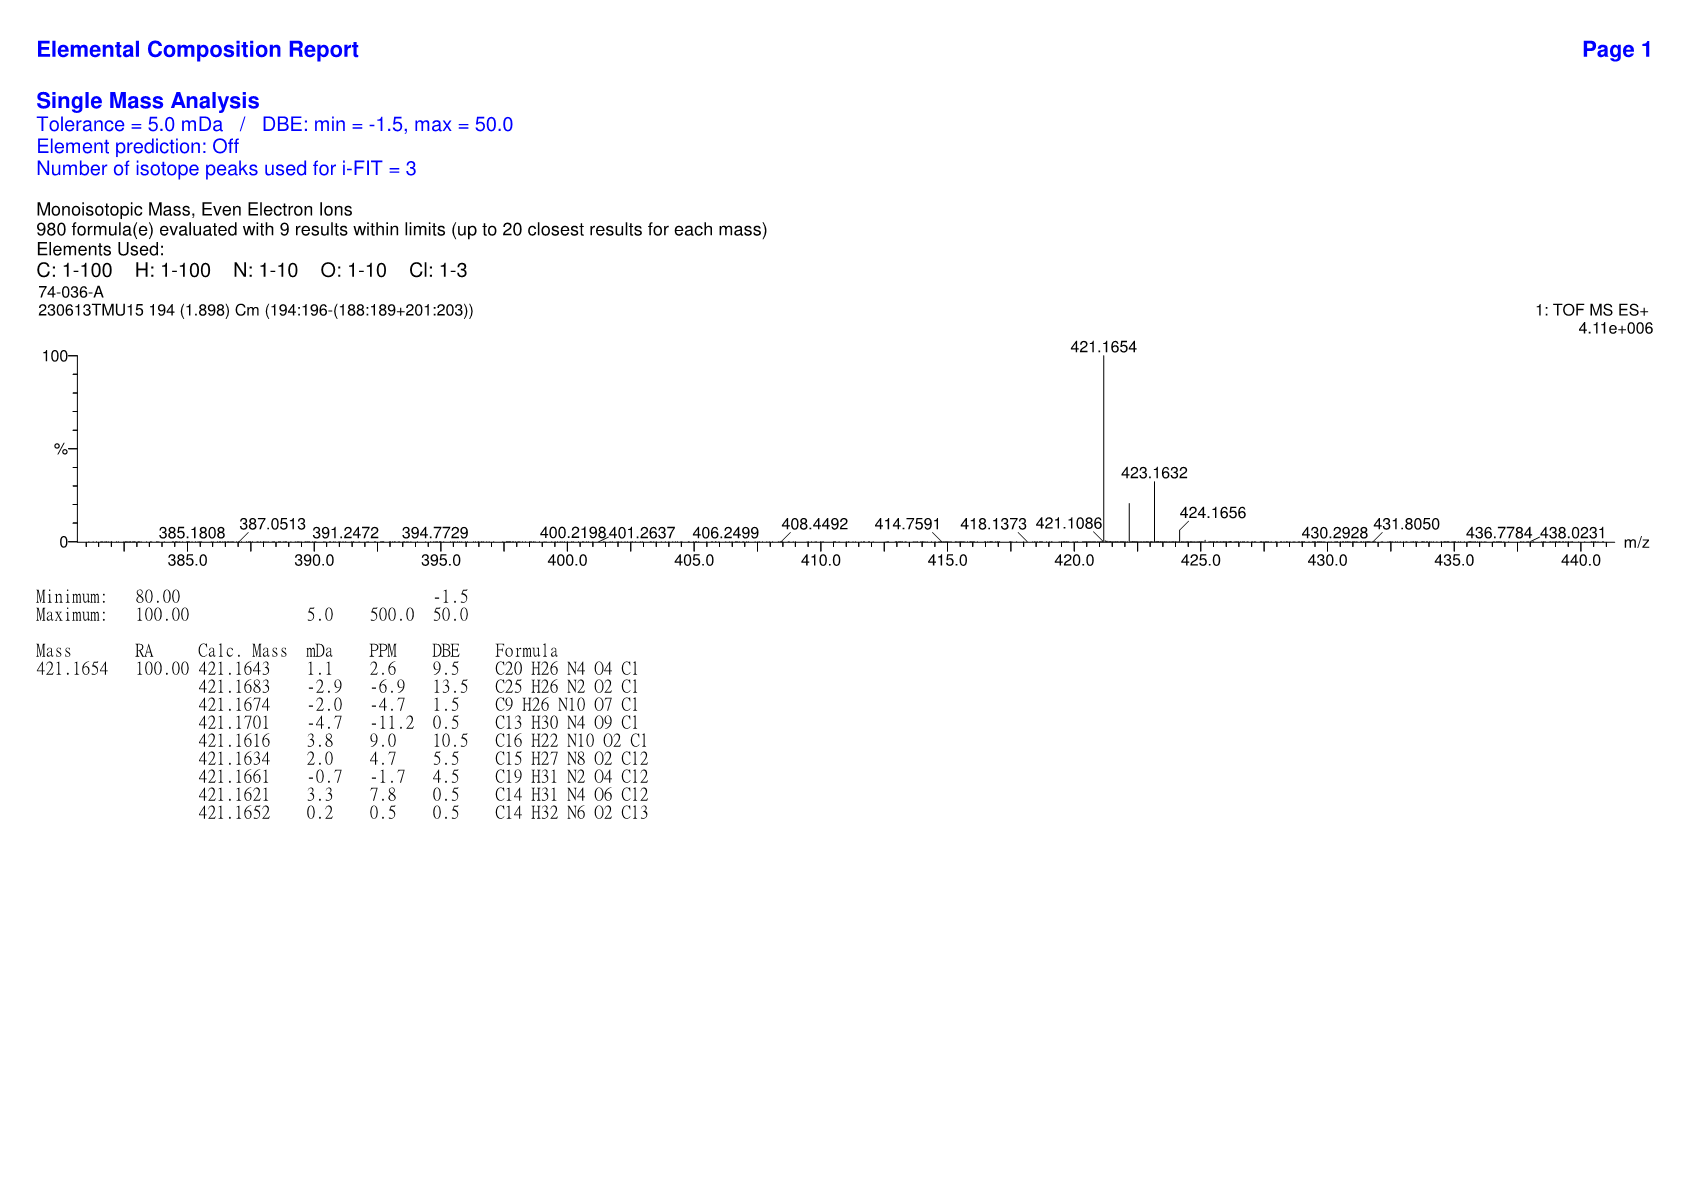
**

HRMS spectrum of compound **D8a**


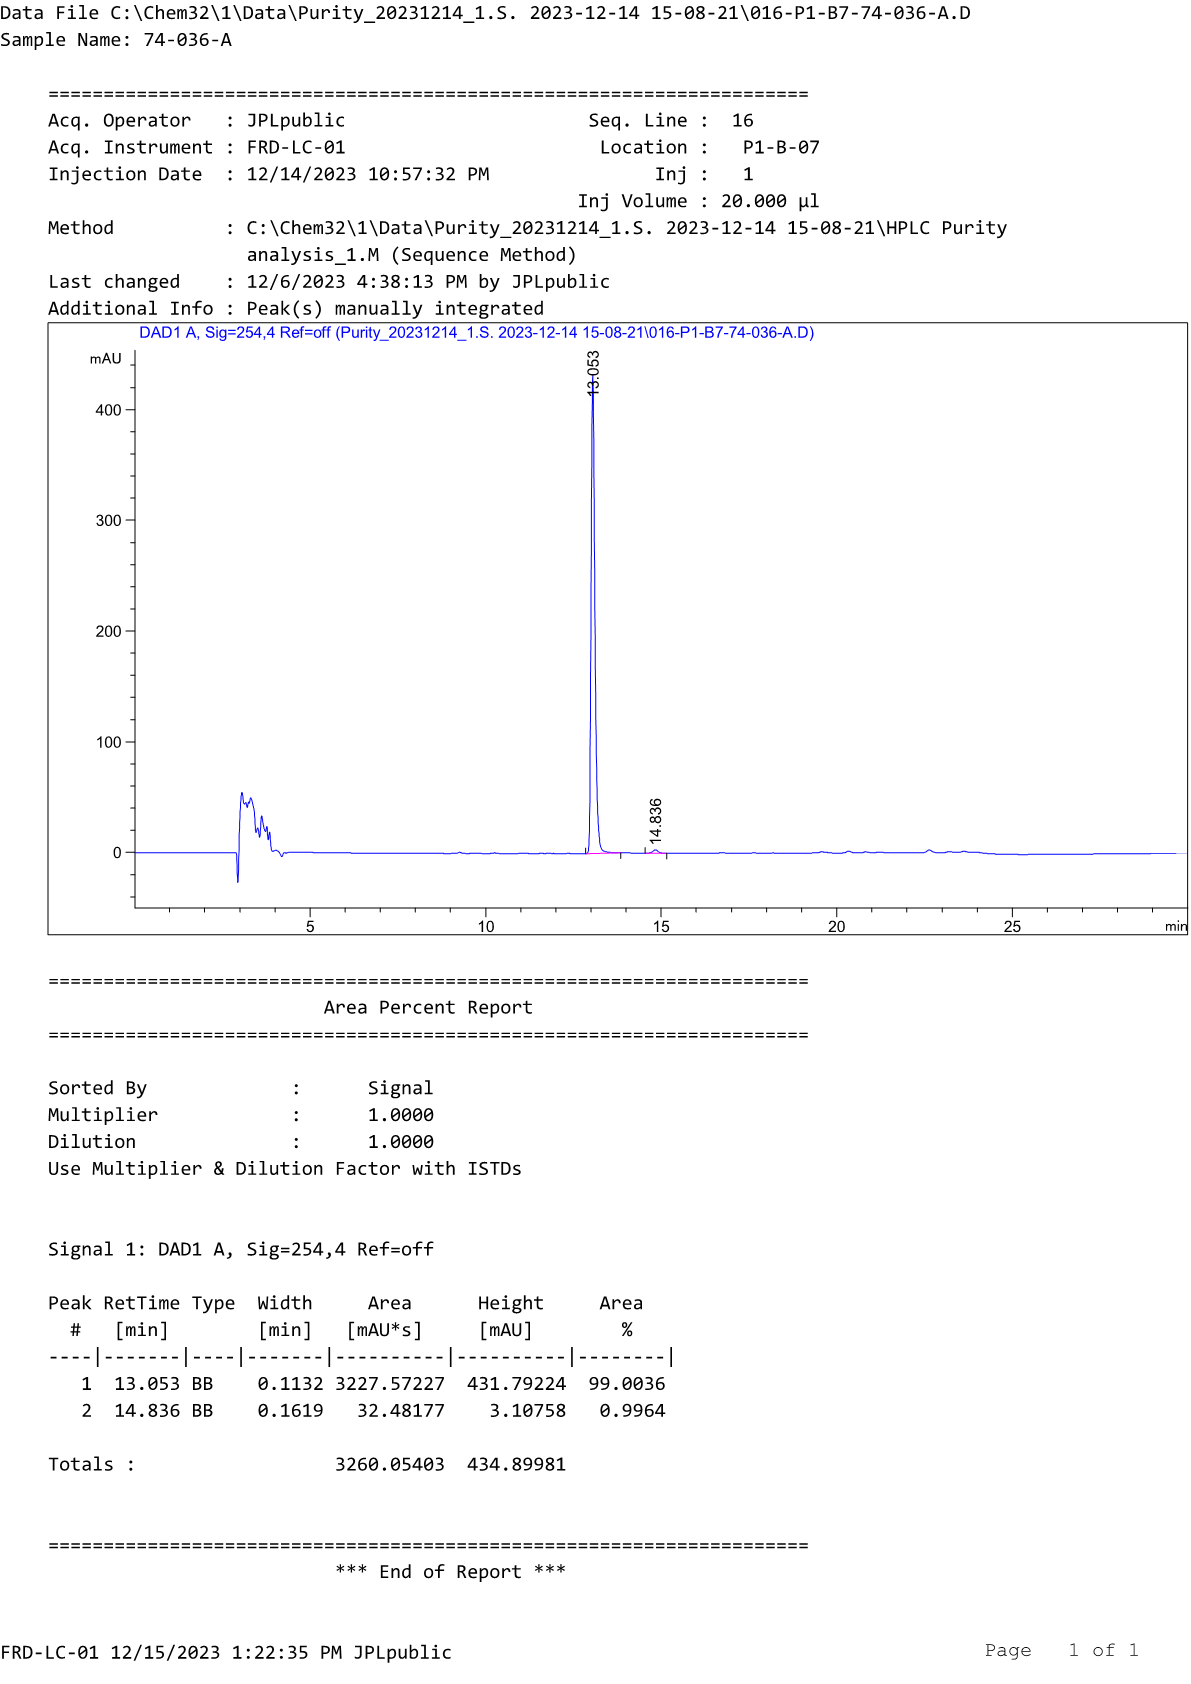


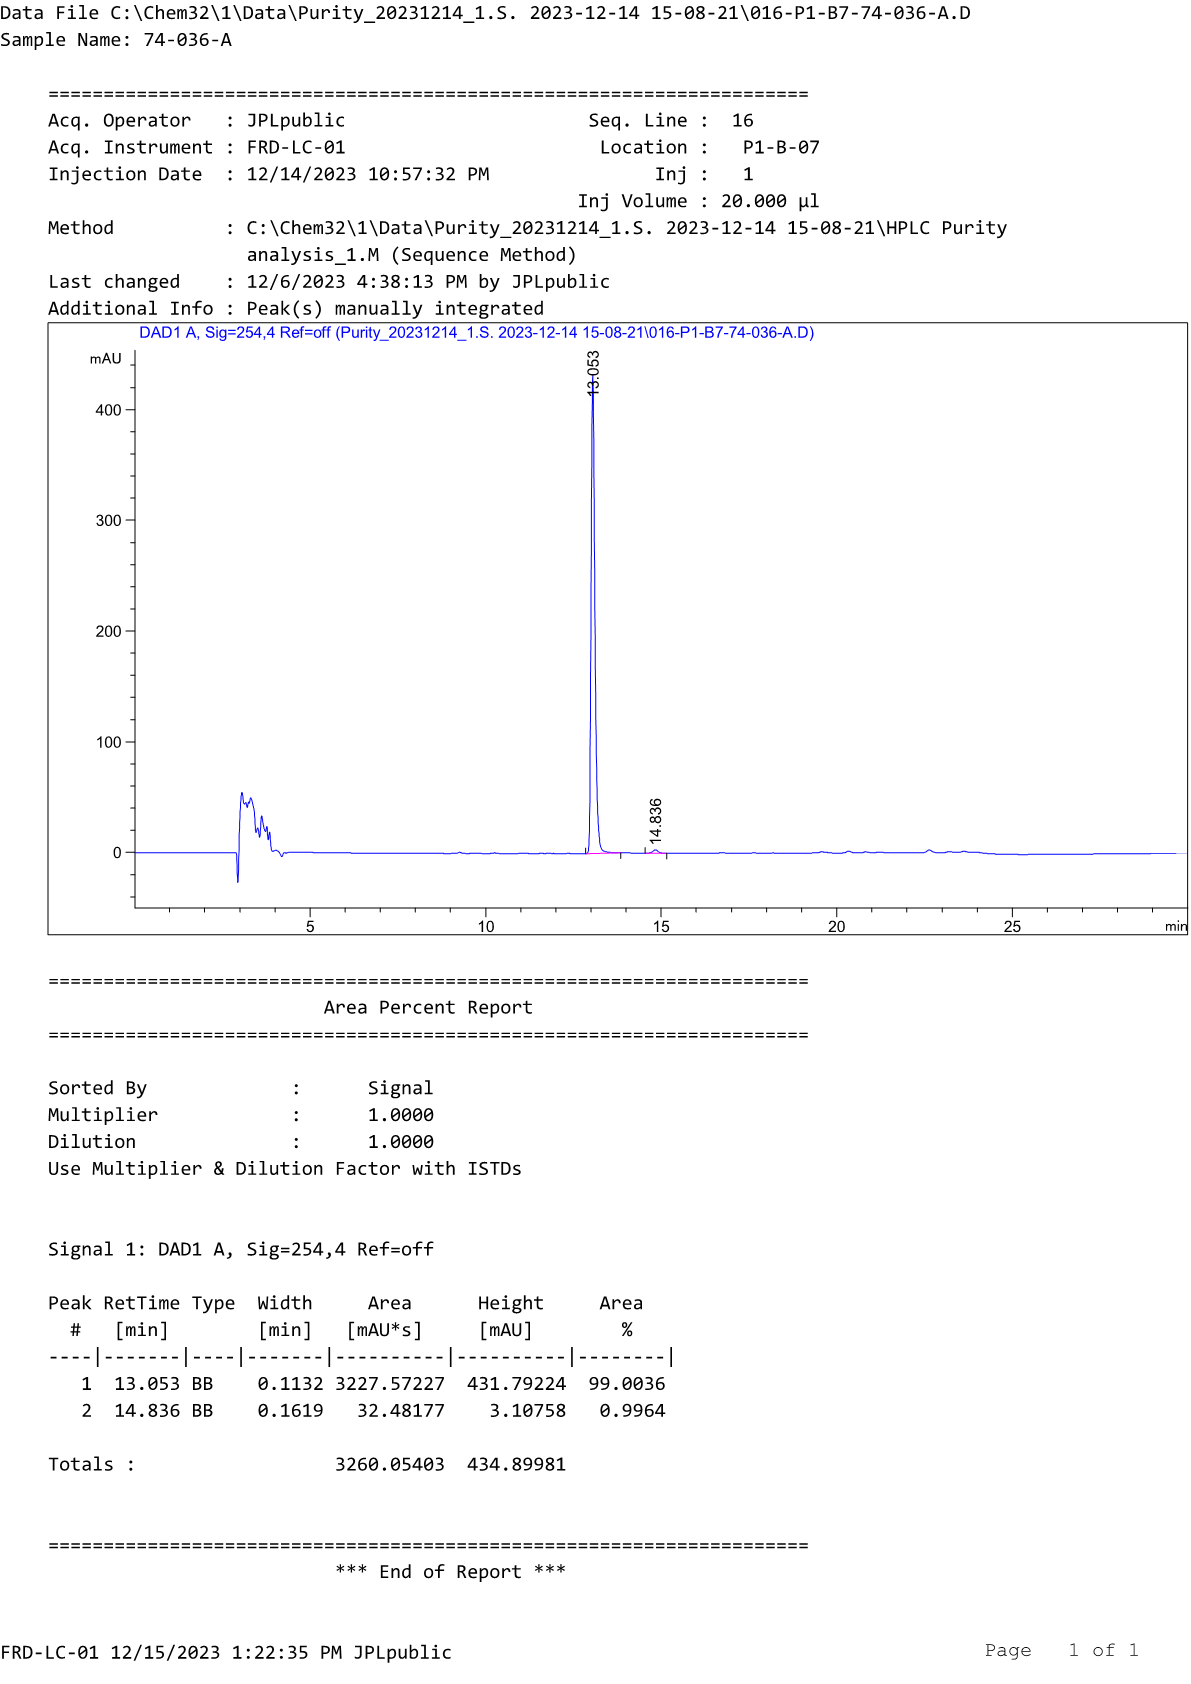


HPLC profile of compound **D8a**


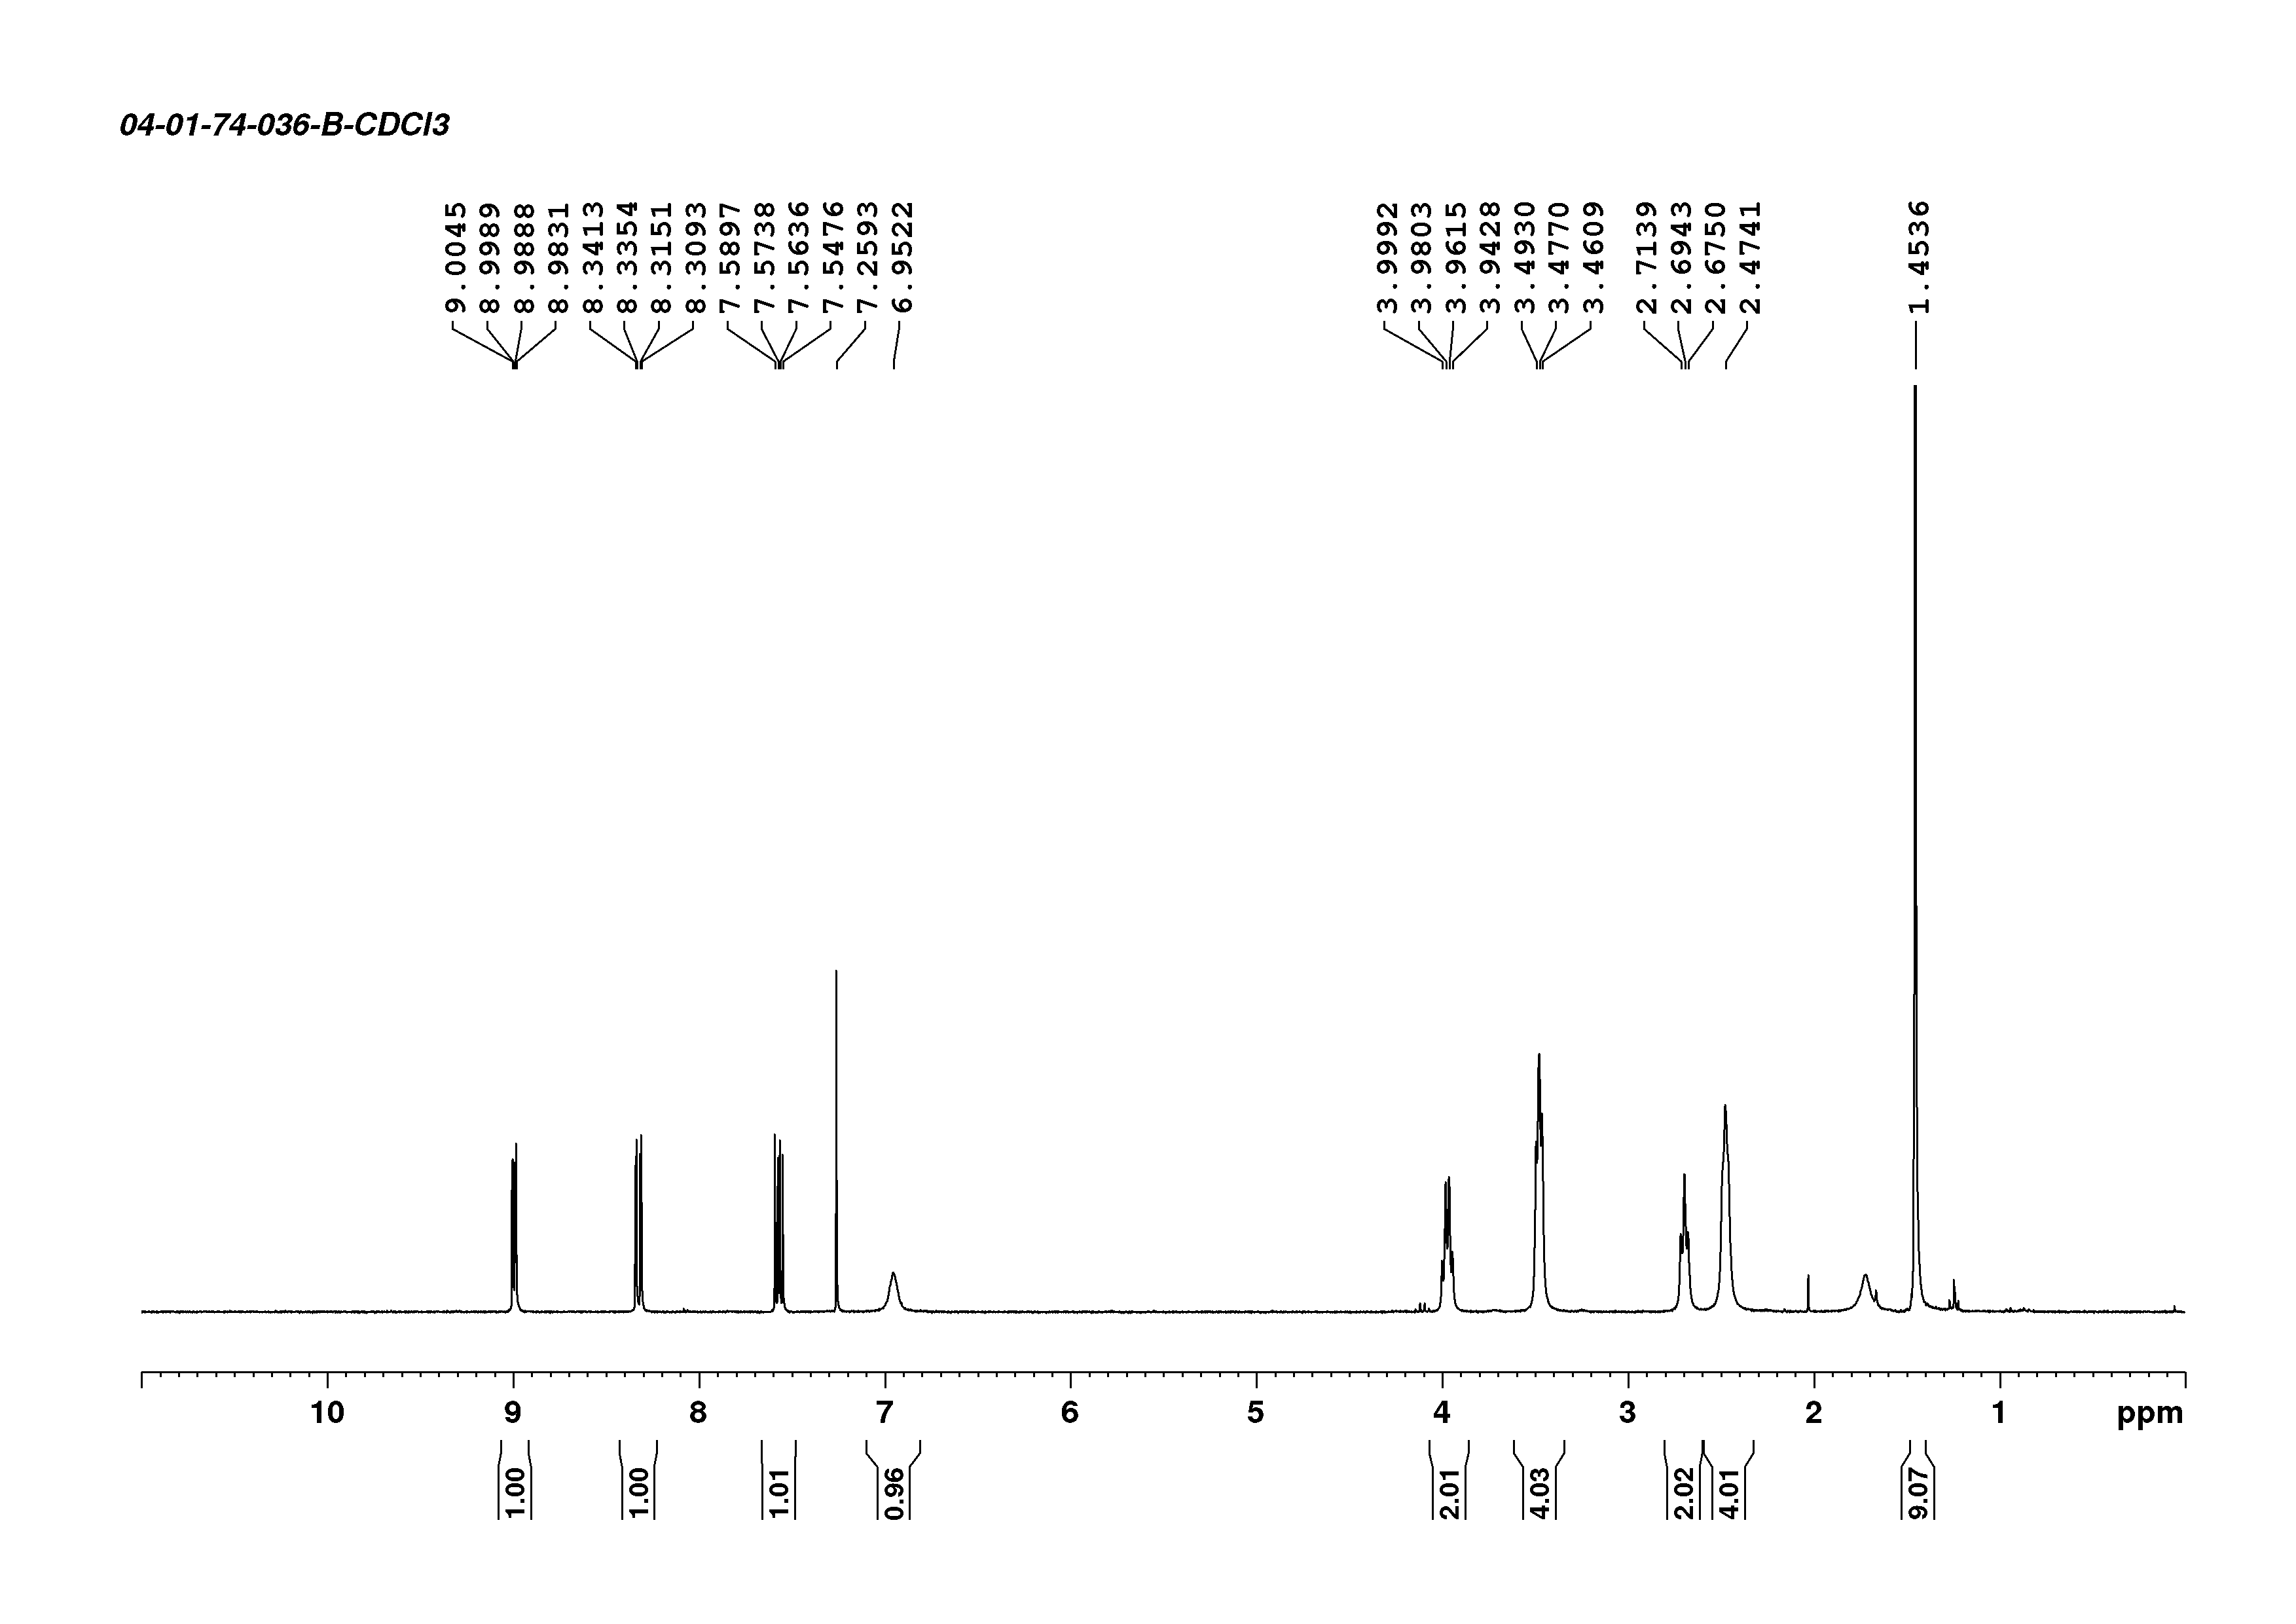


1H-NMR spectrum of compound **D8b**


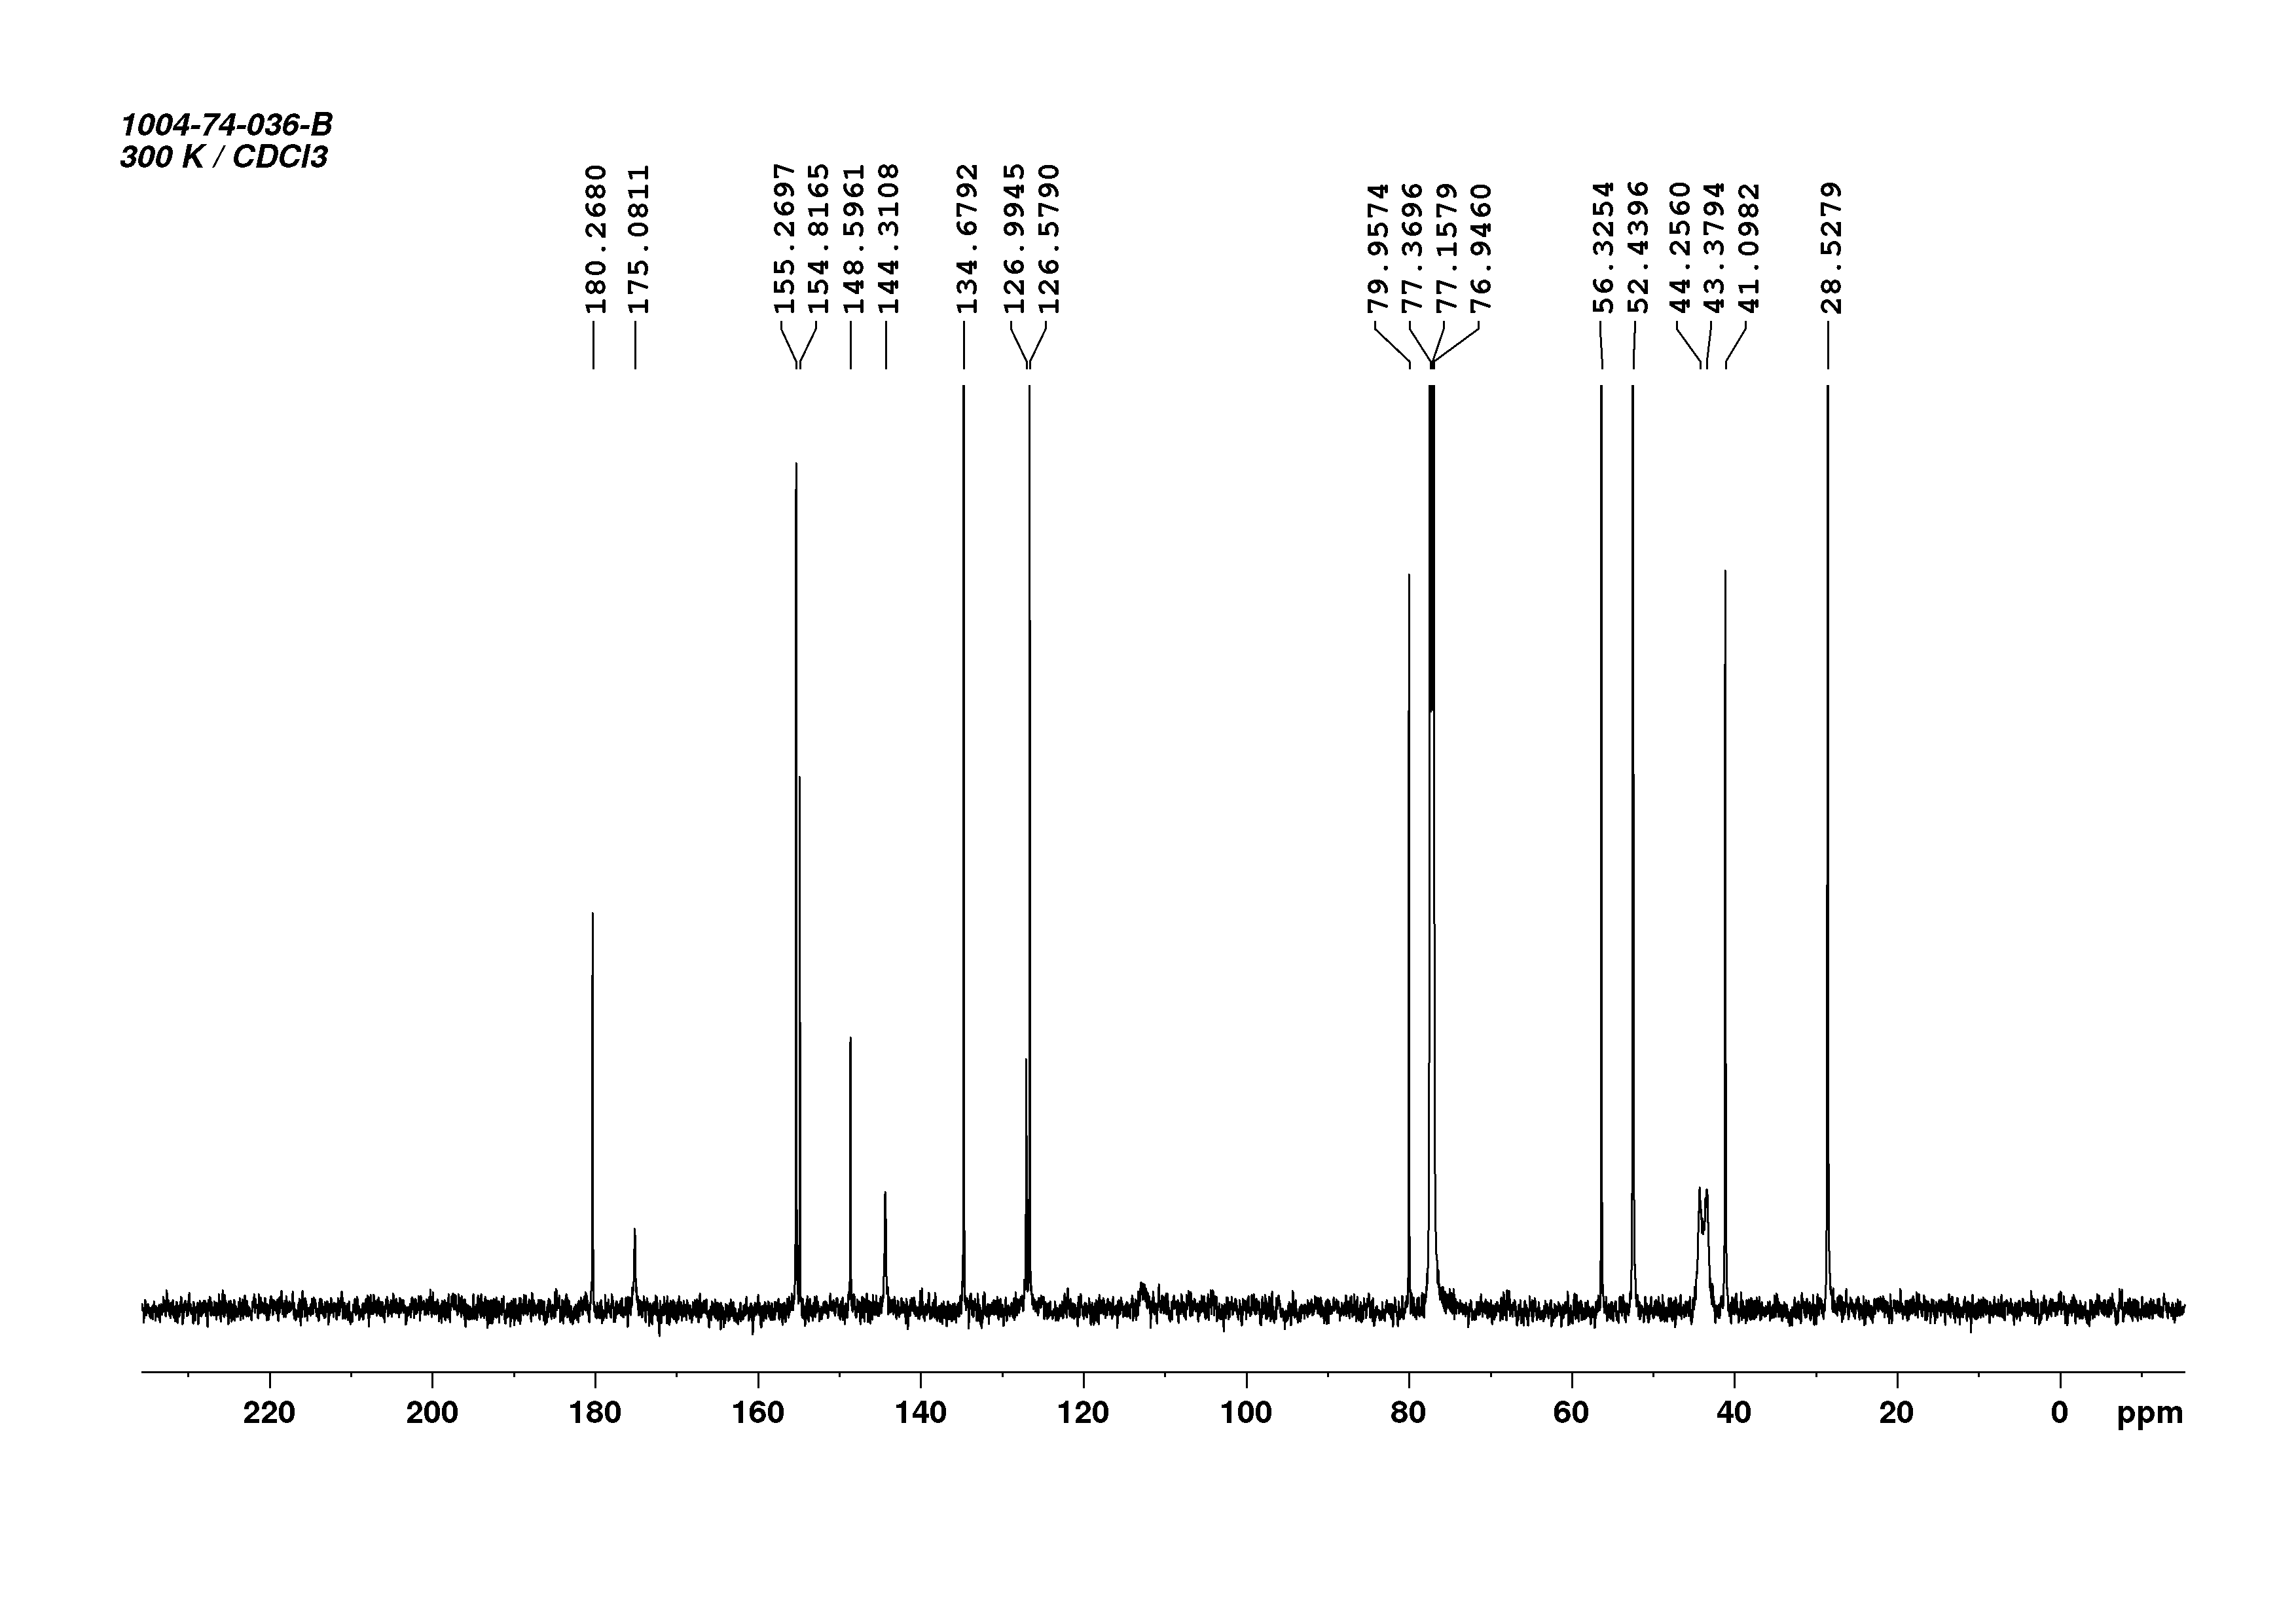


3C-NMR spectrum of compound **D8b**

**
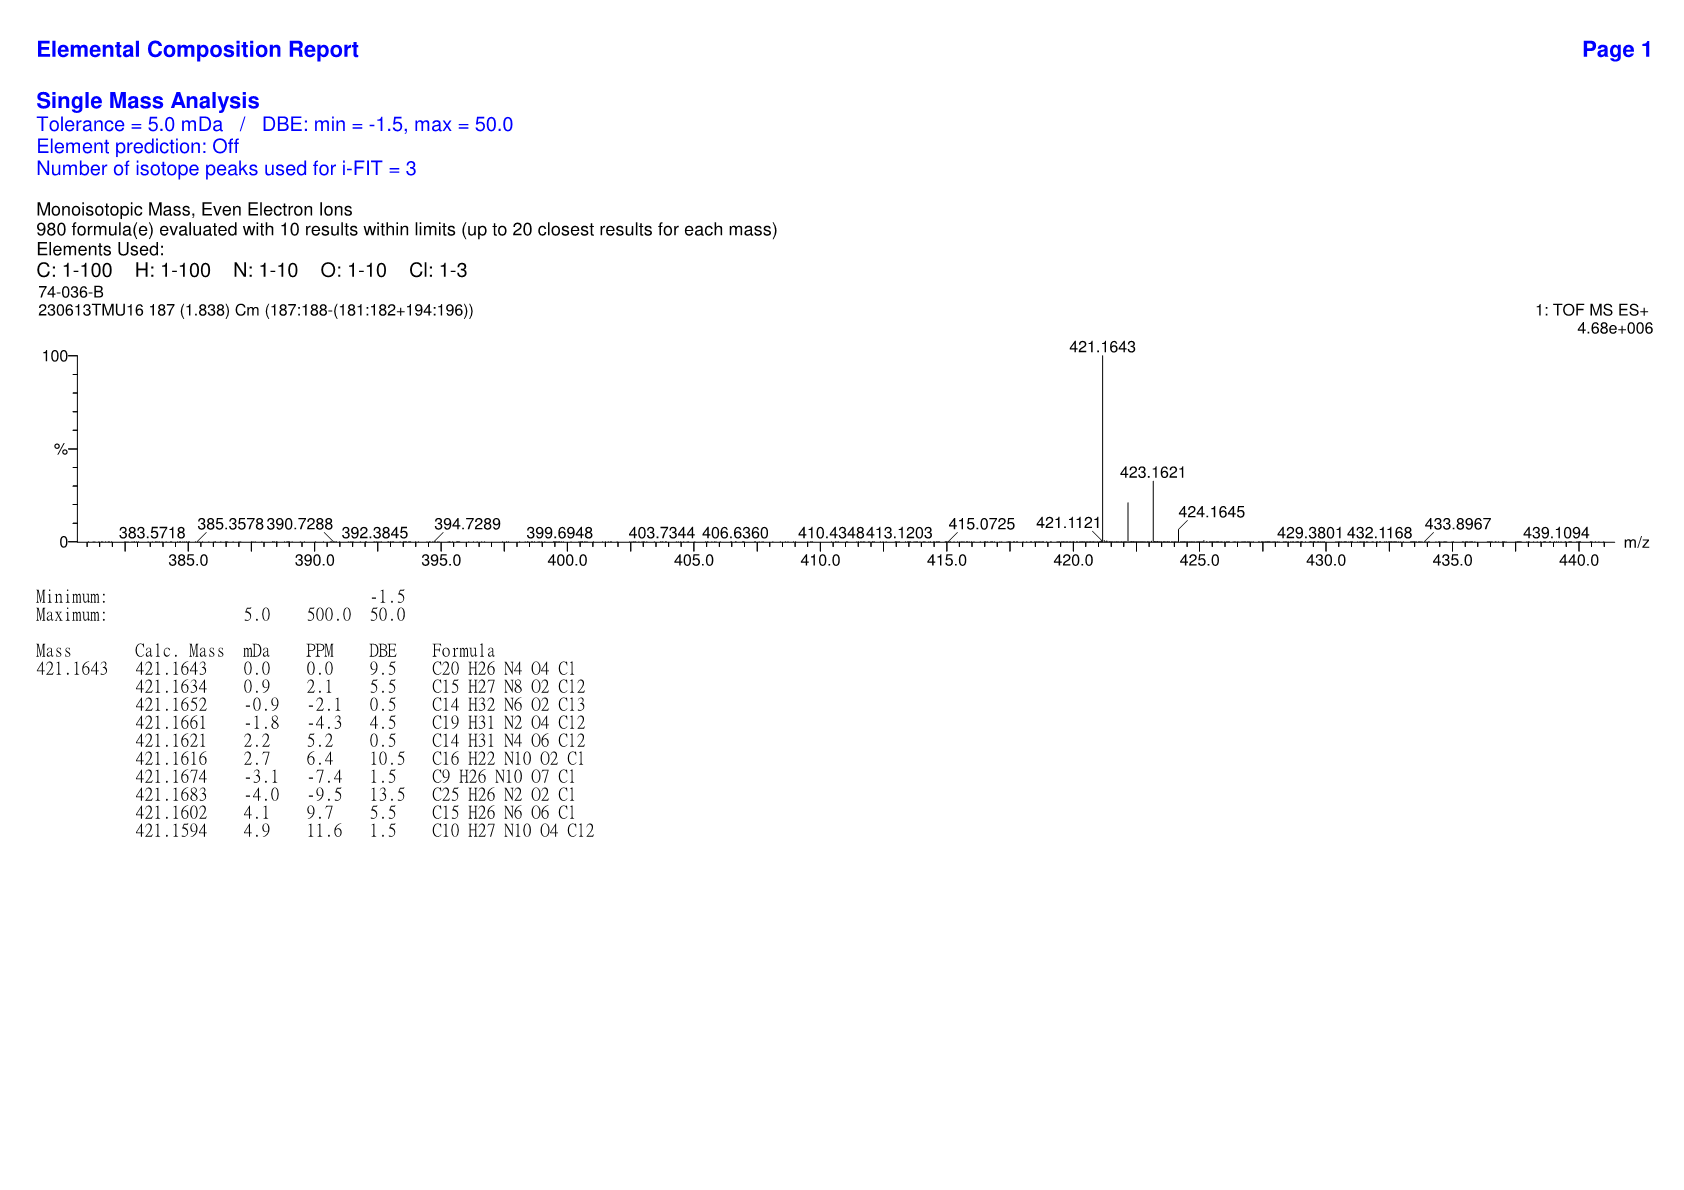
**

HRMS spectrum of compound **D8b**


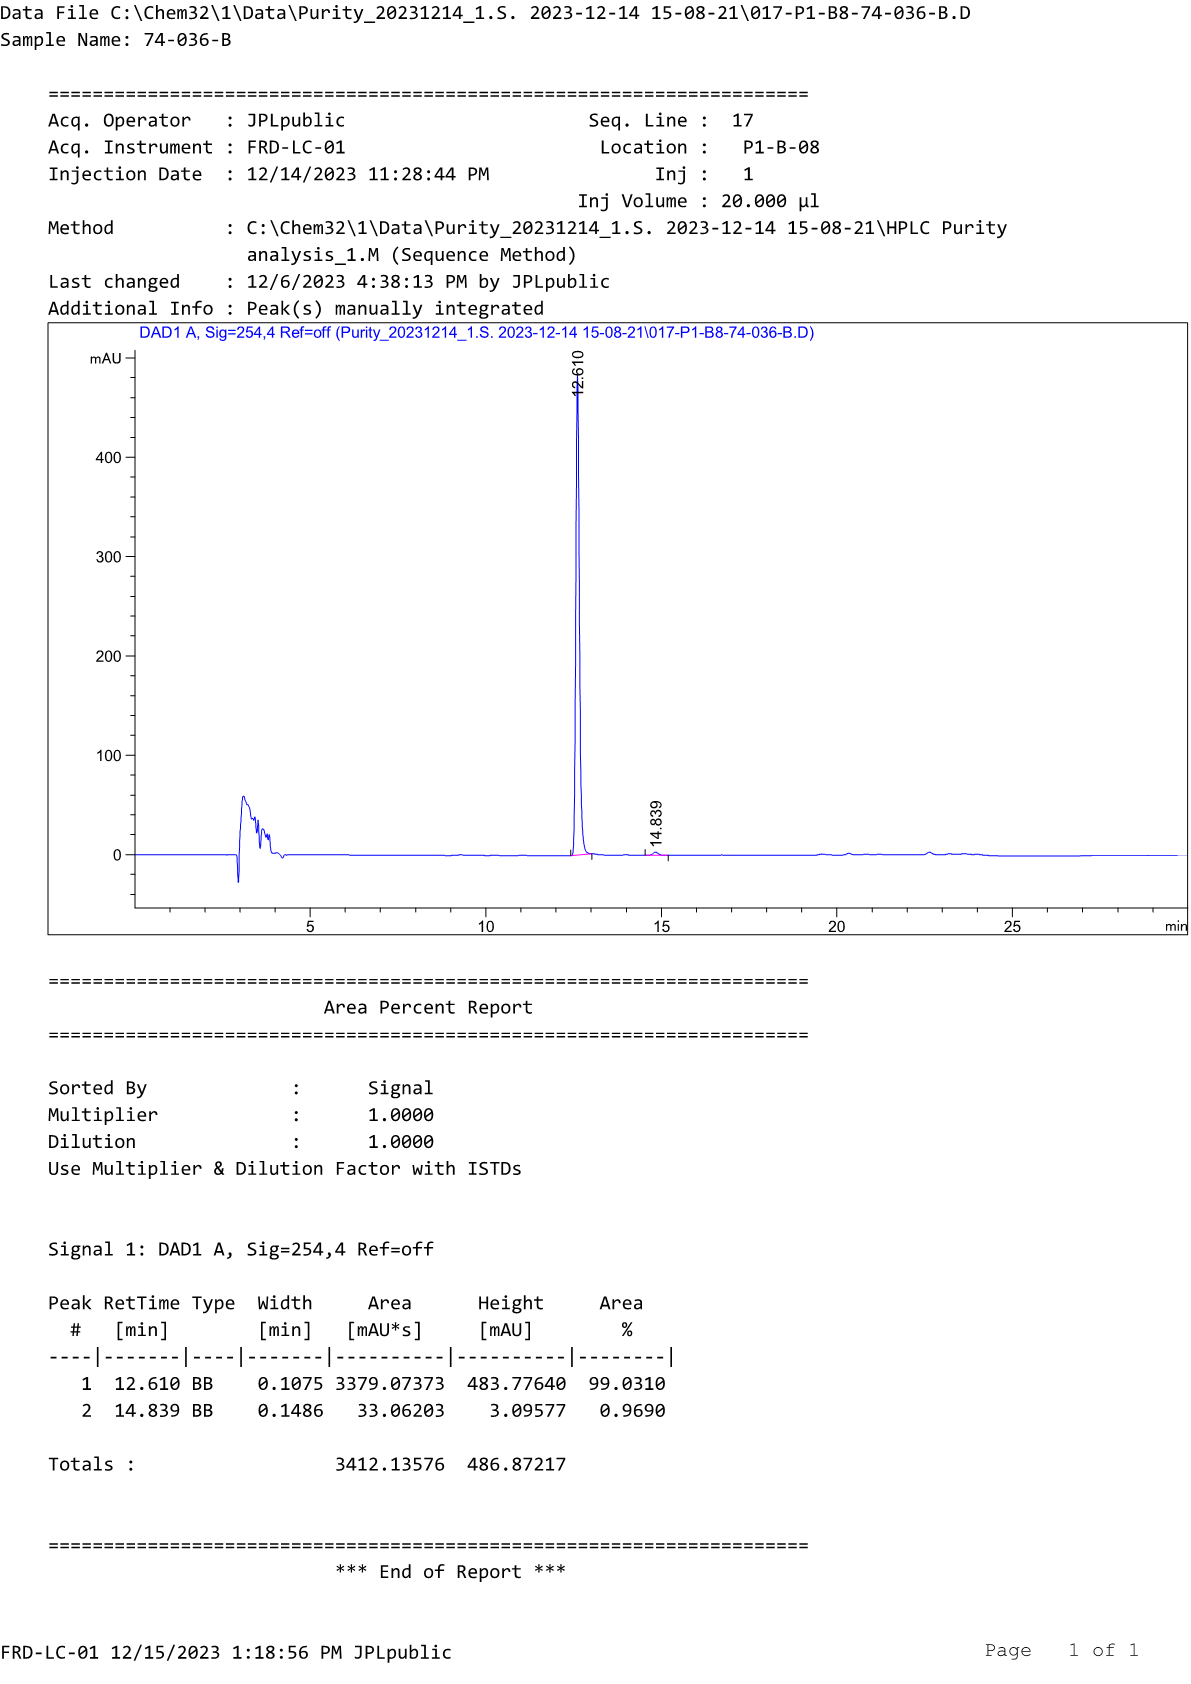


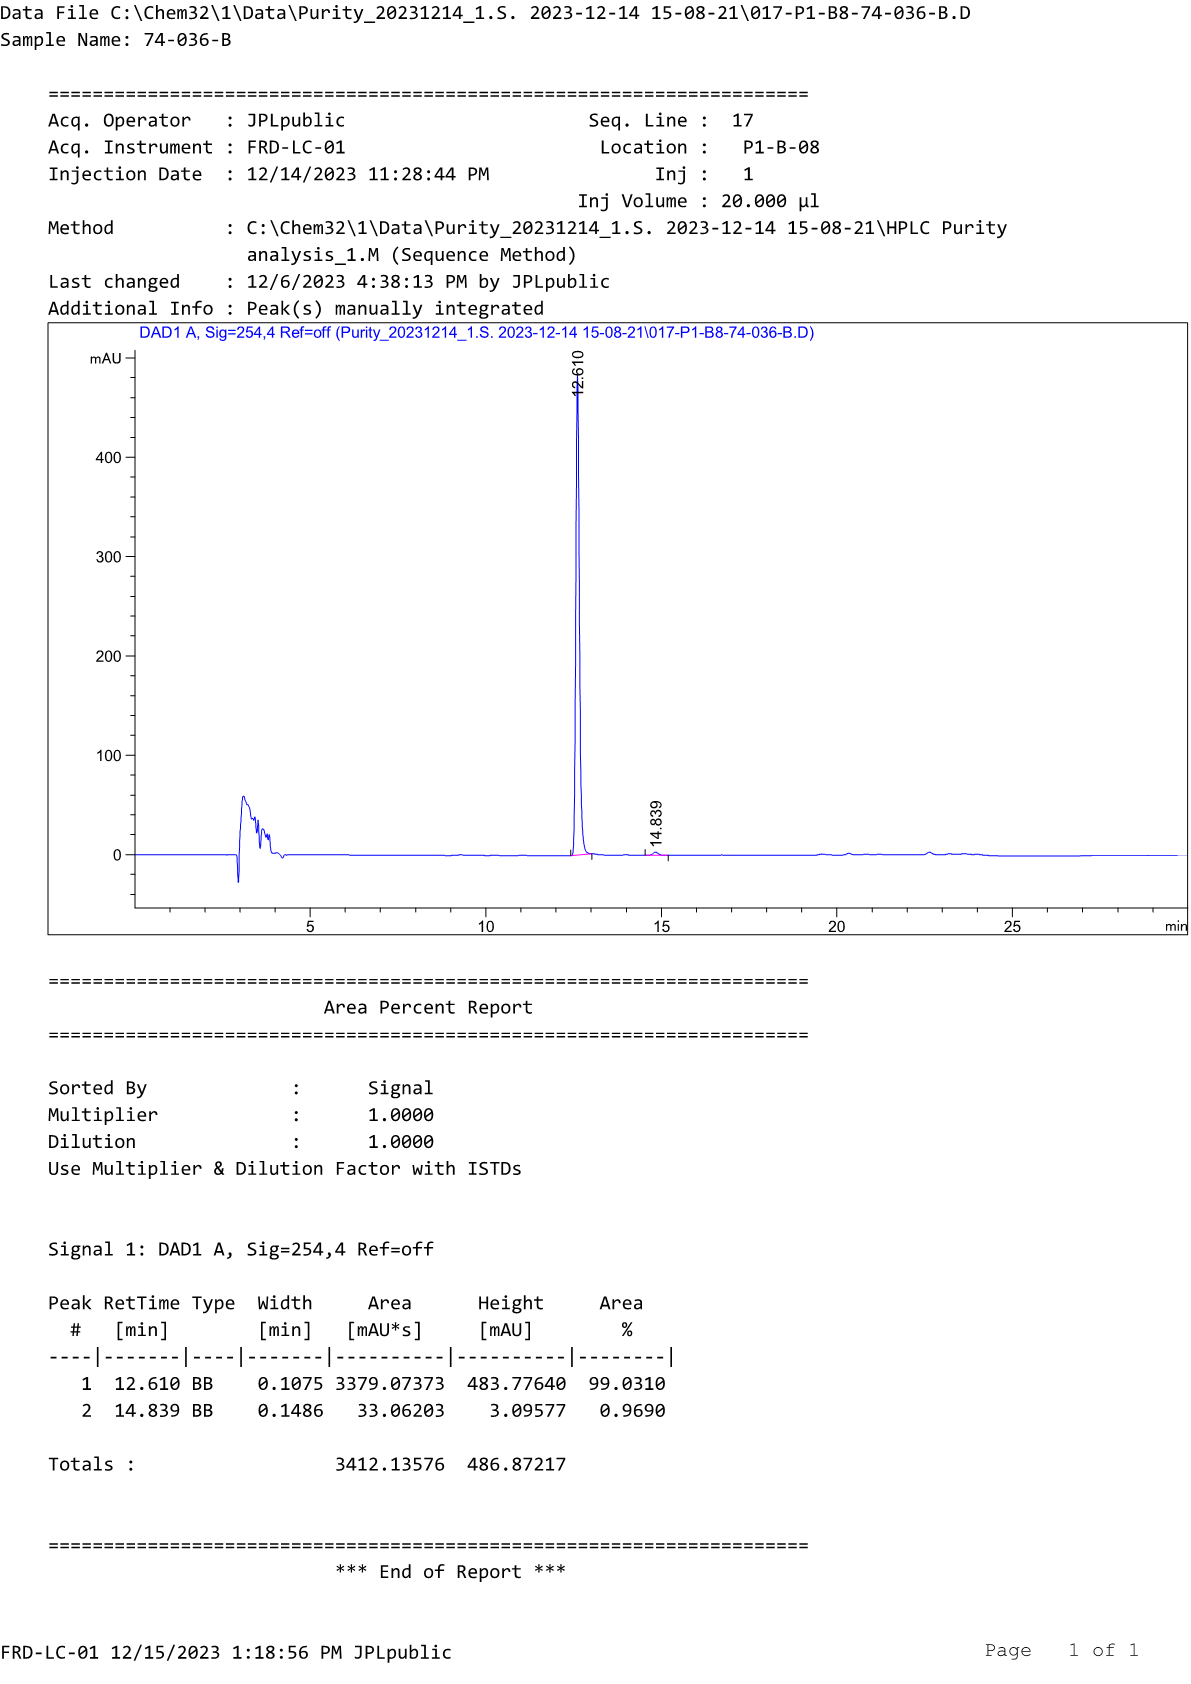


HPLC profile of compound **D8b**


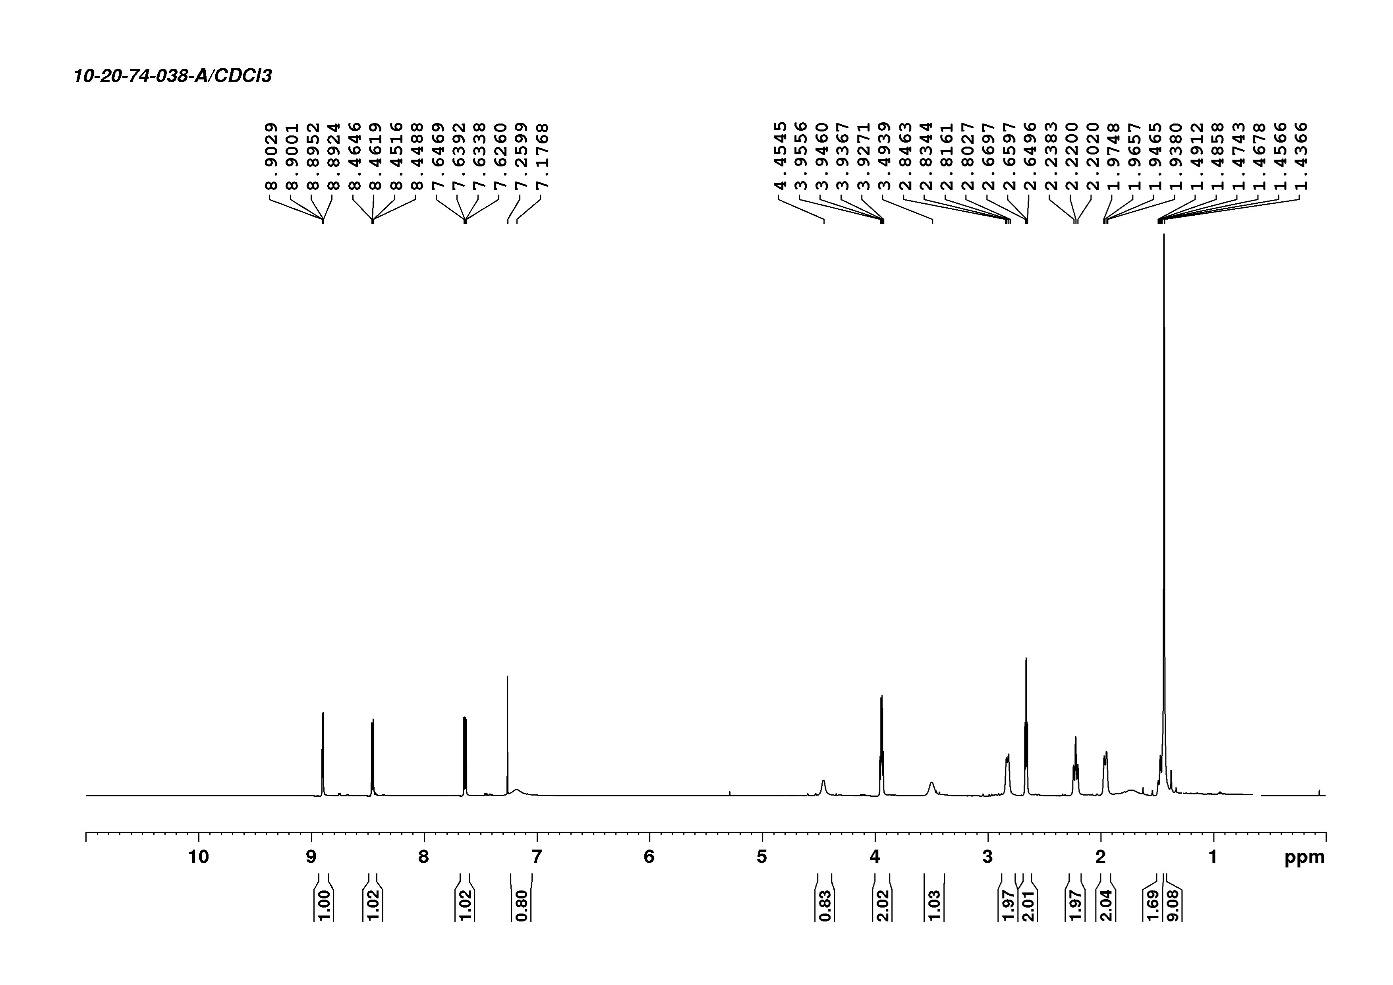


1H-NMR spectrum of compound **D9a**


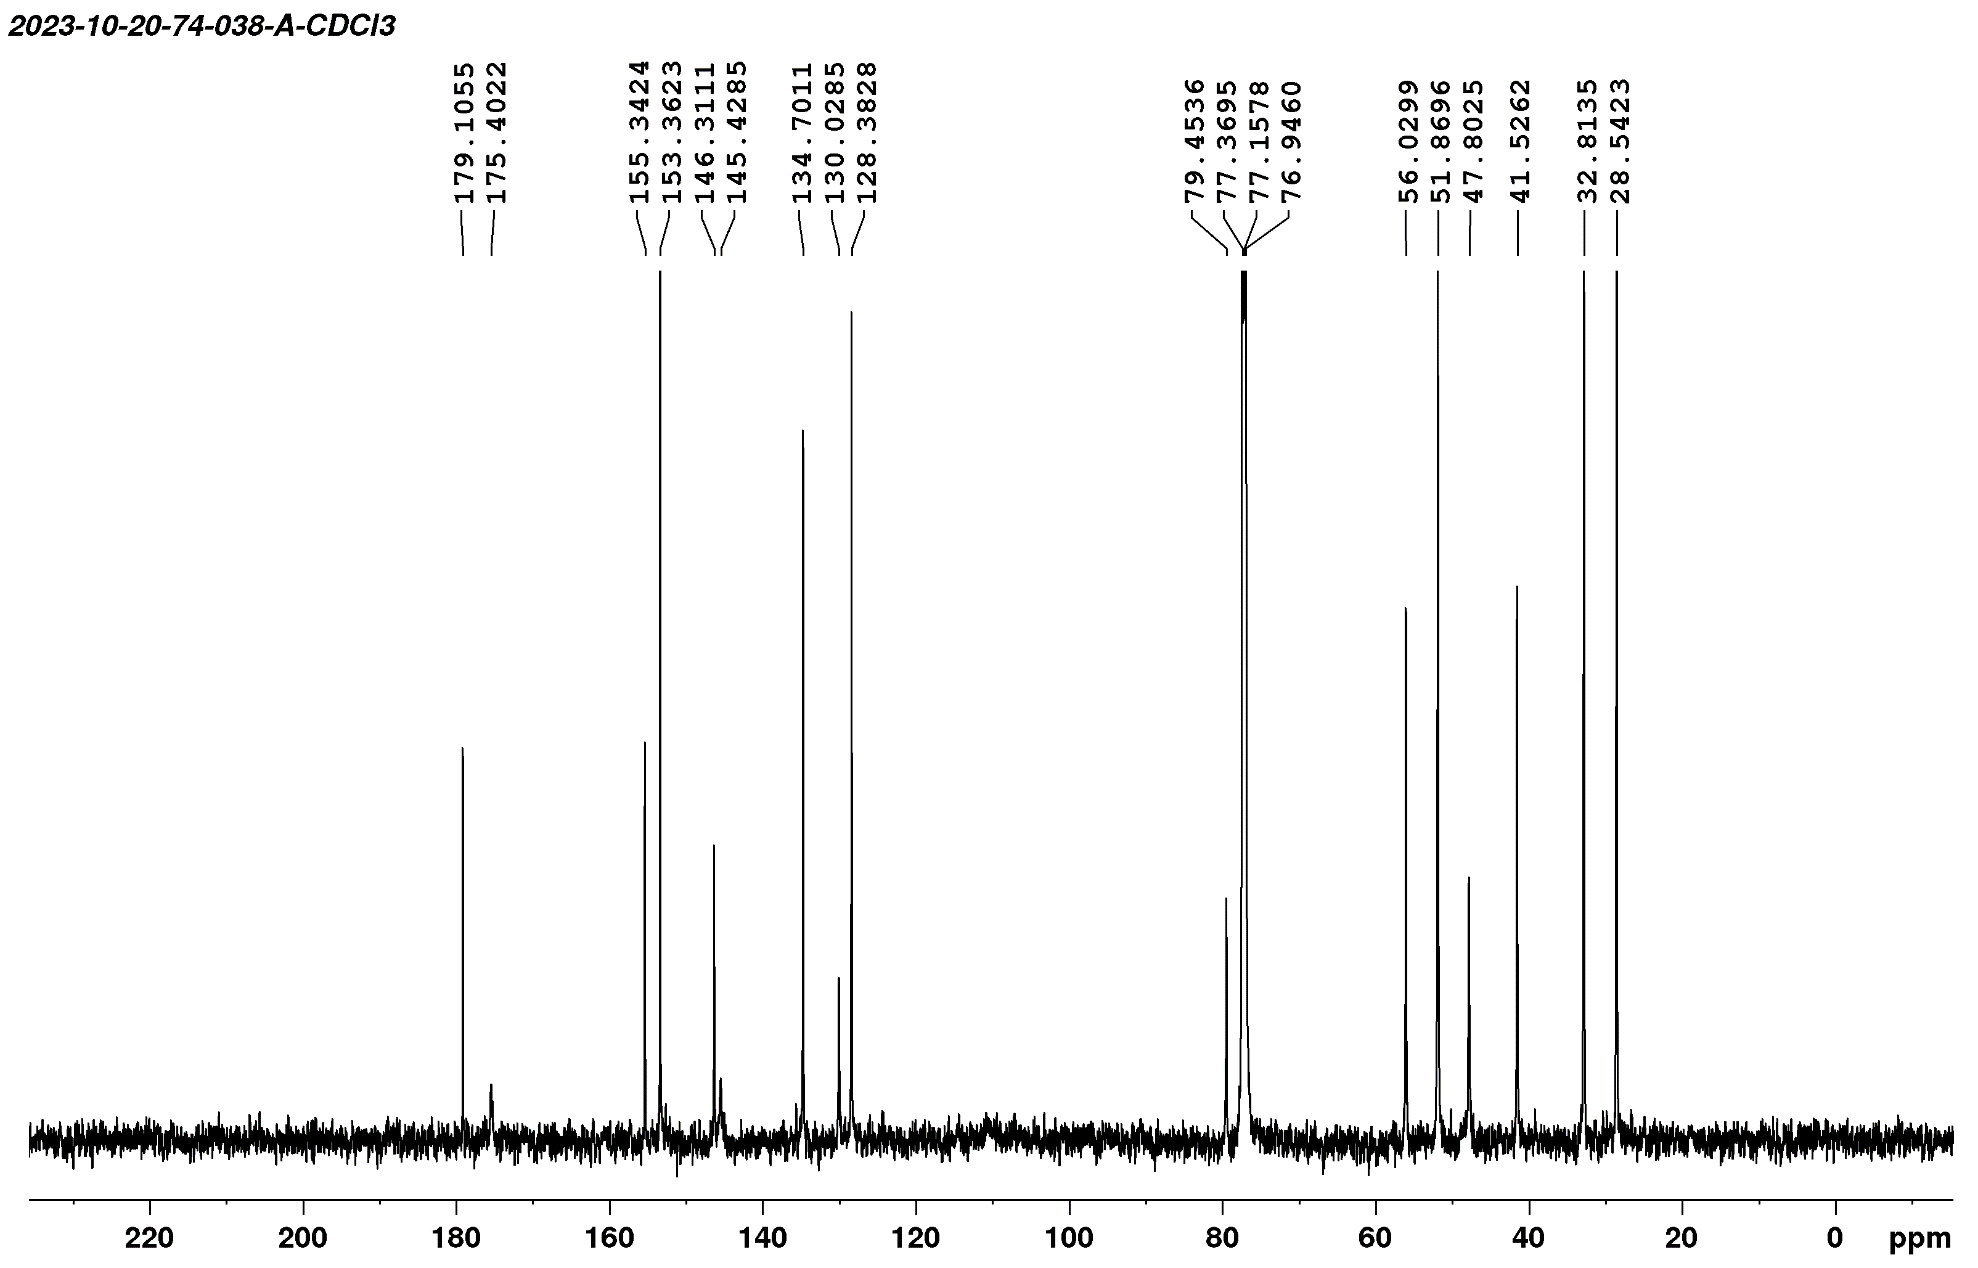


13C-NMR spectrum of compound **D9a**

**
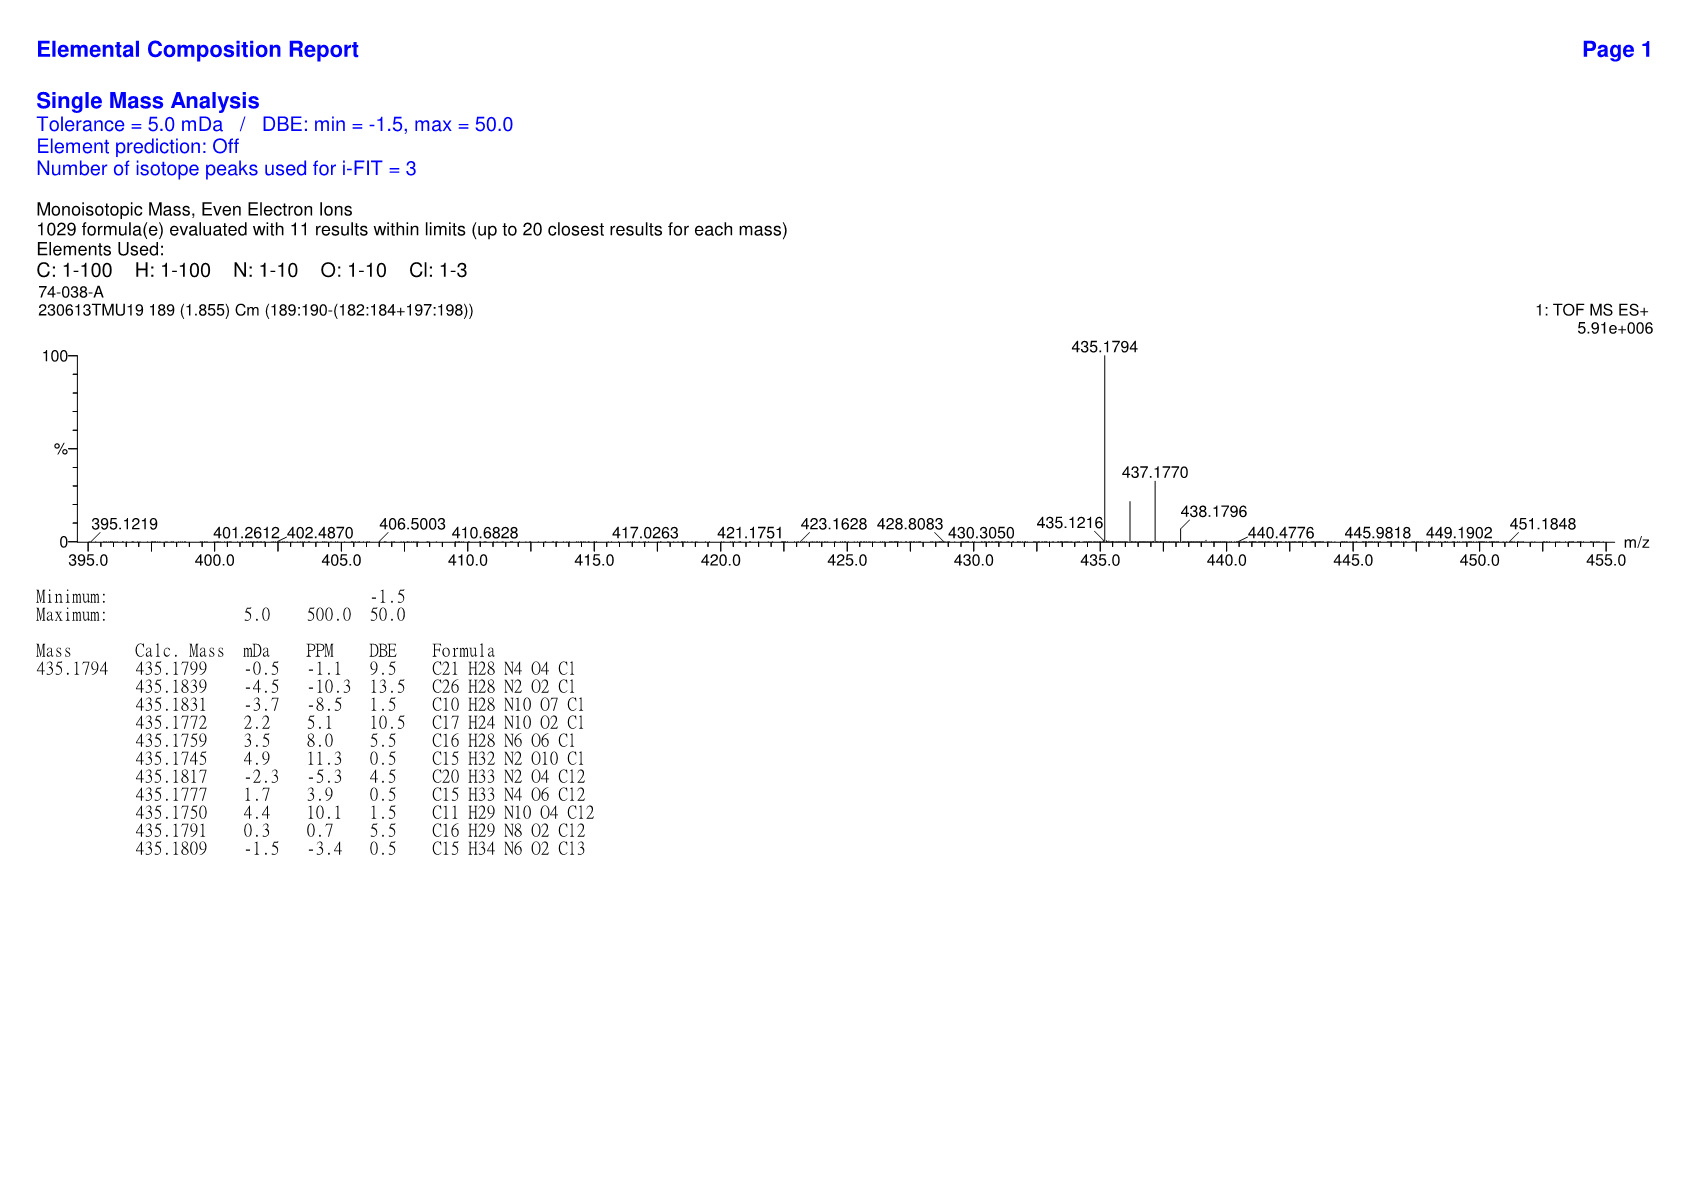
**

HRMS spectrum of compound **D9a**


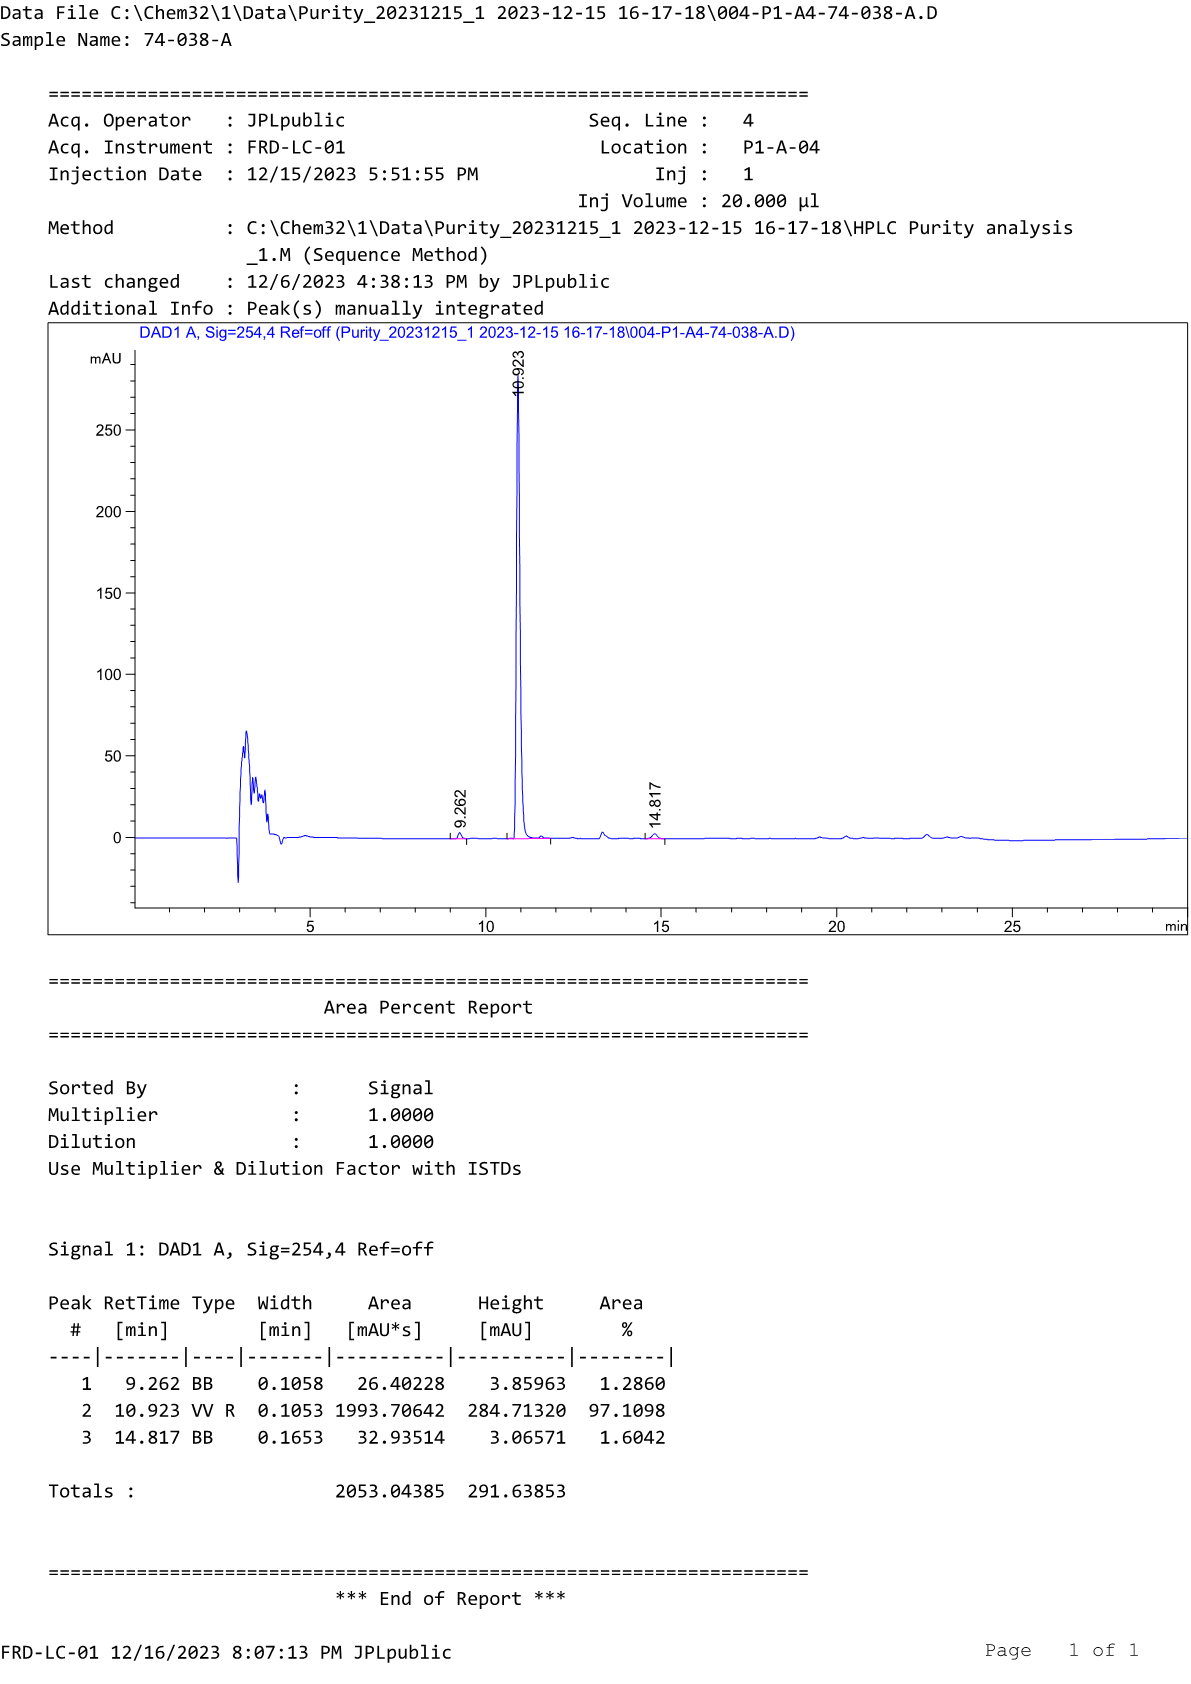


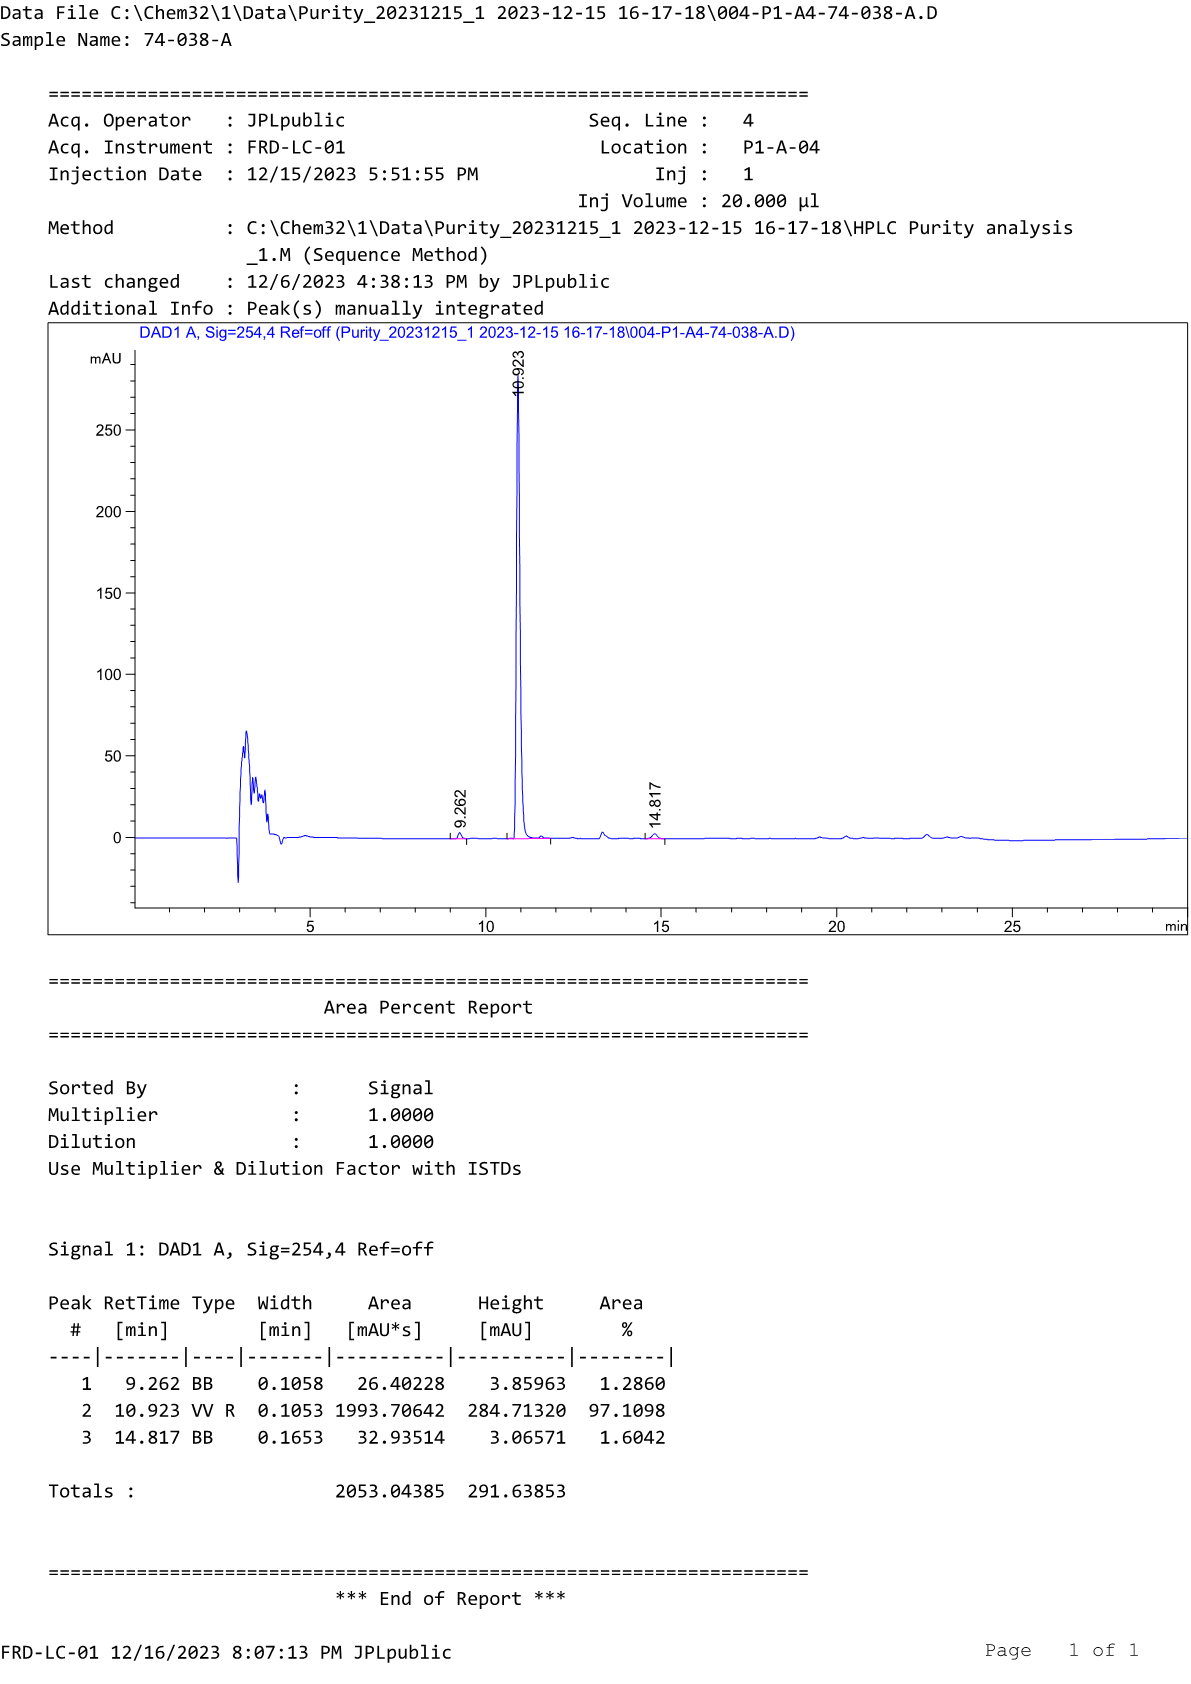


HPLC profile of compound **D9a**


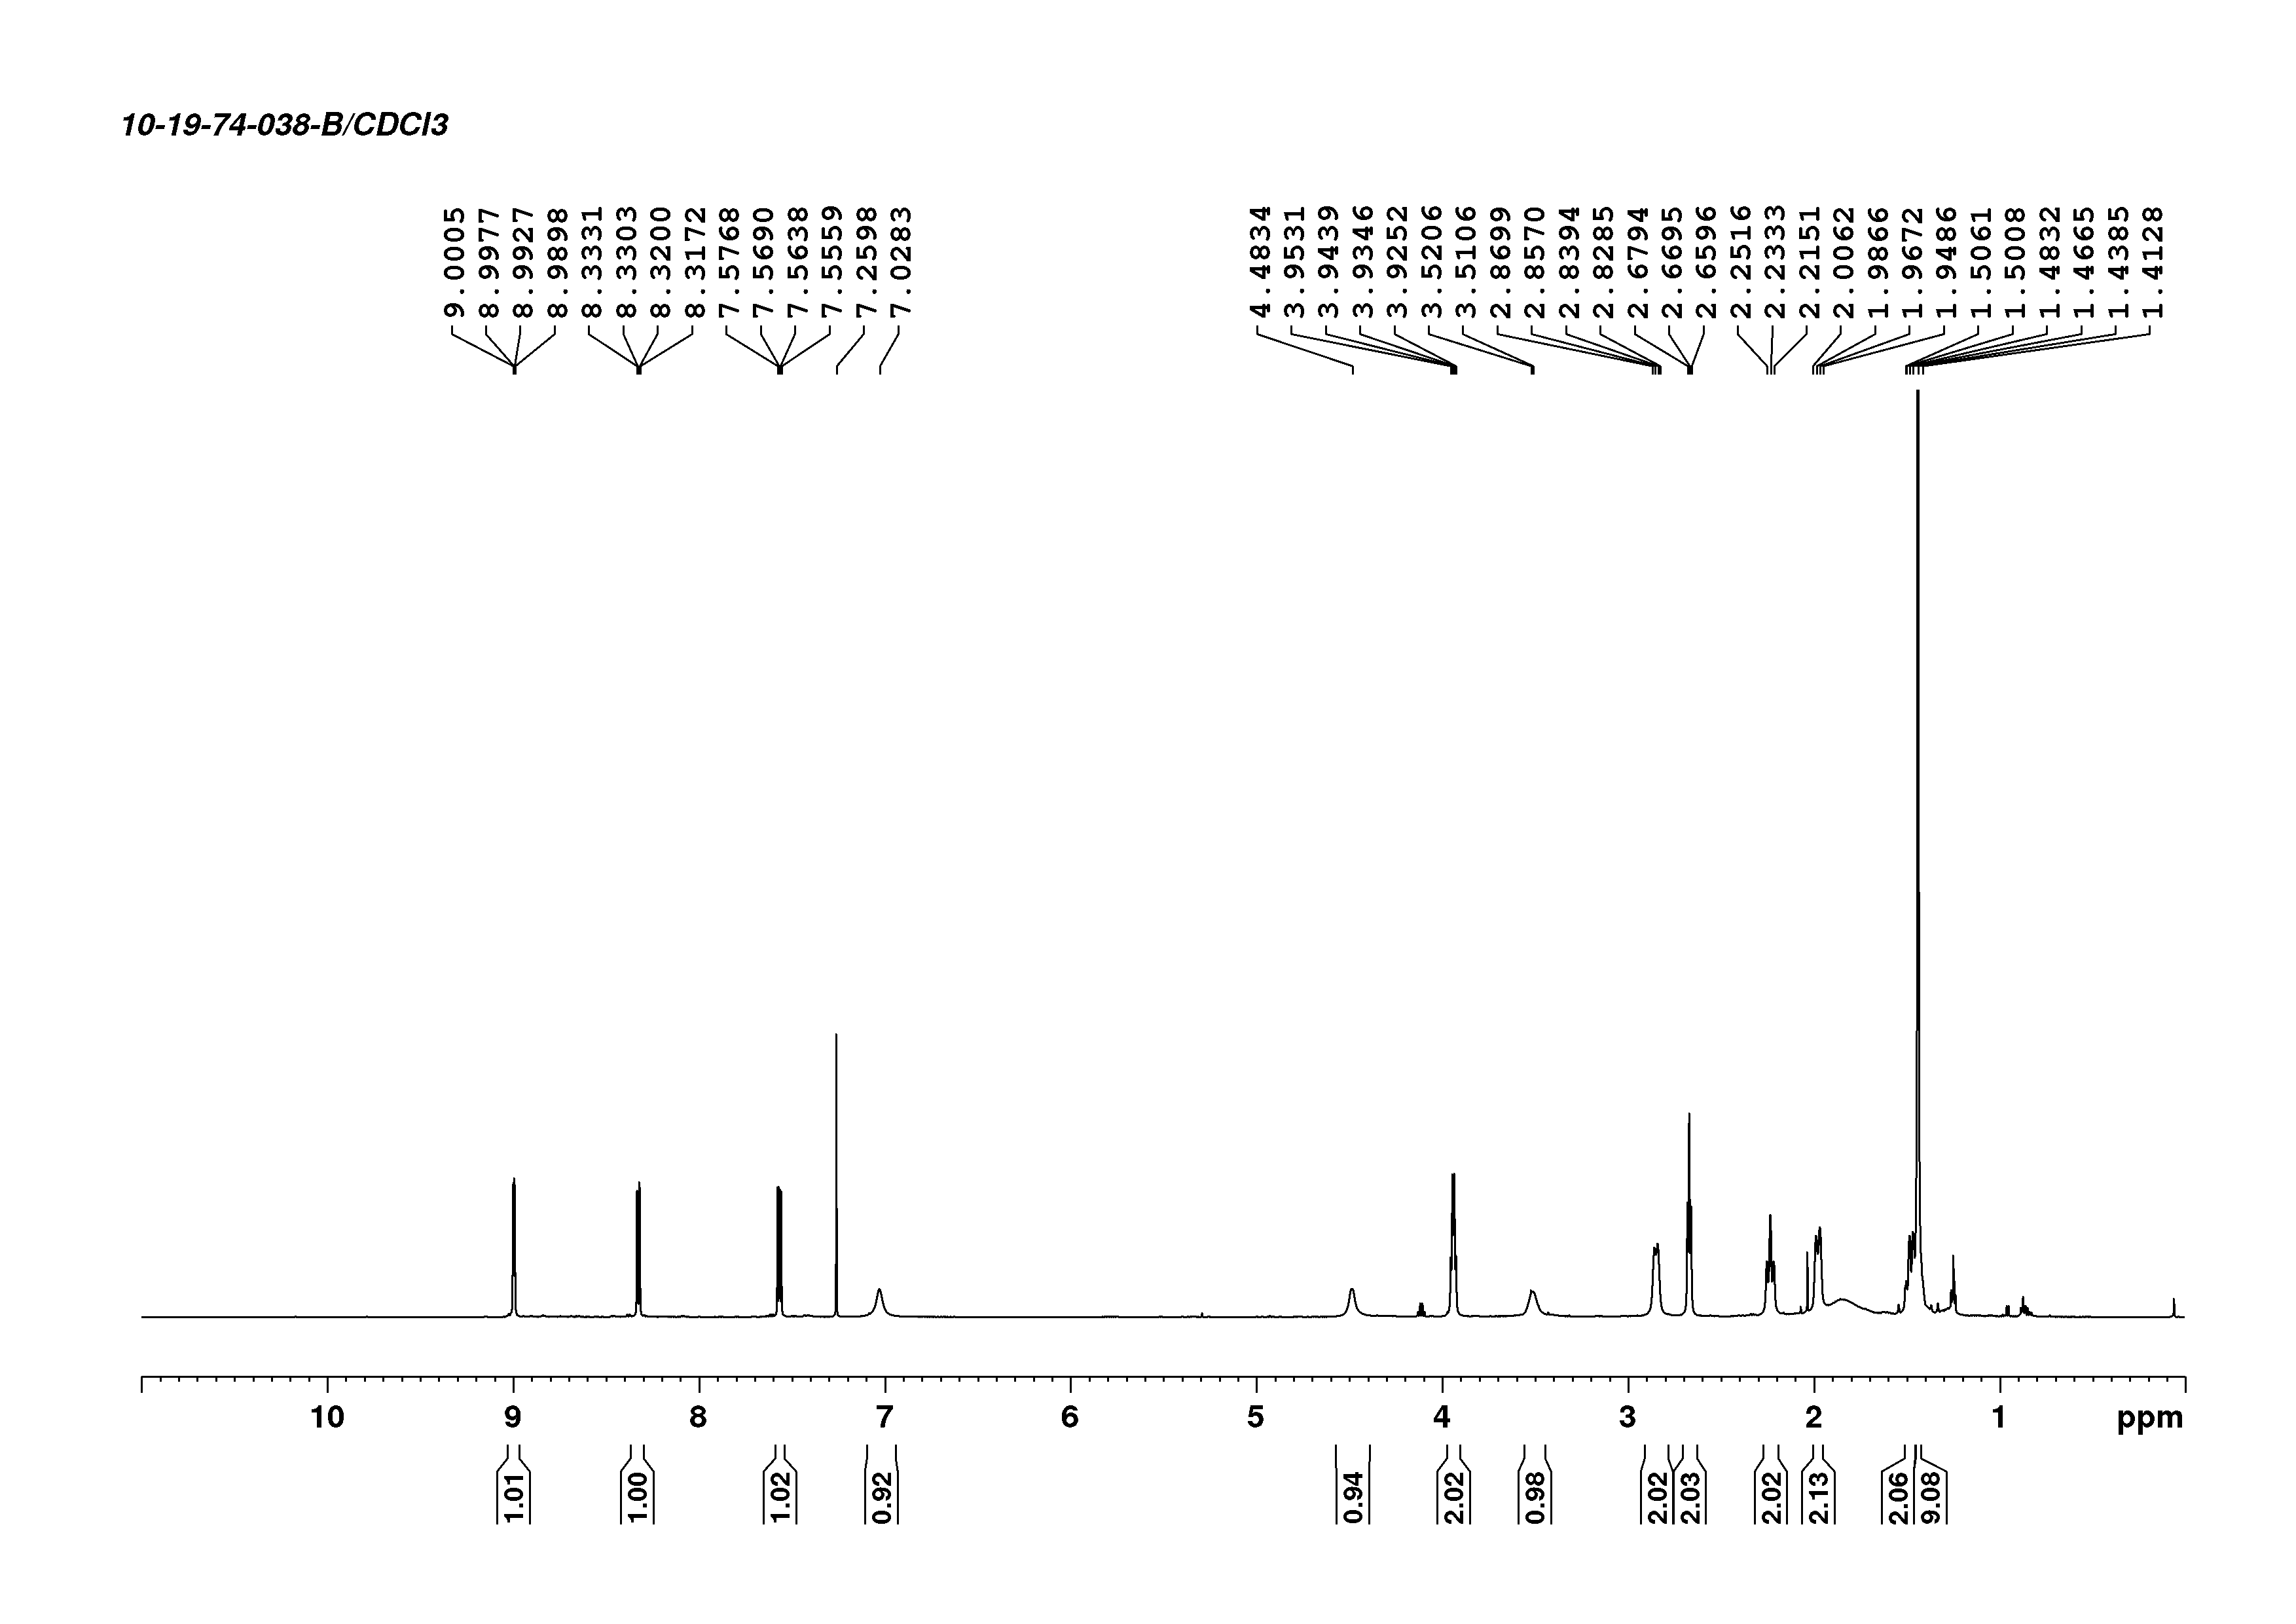


1H-NMR spectrum of compound **D9b**


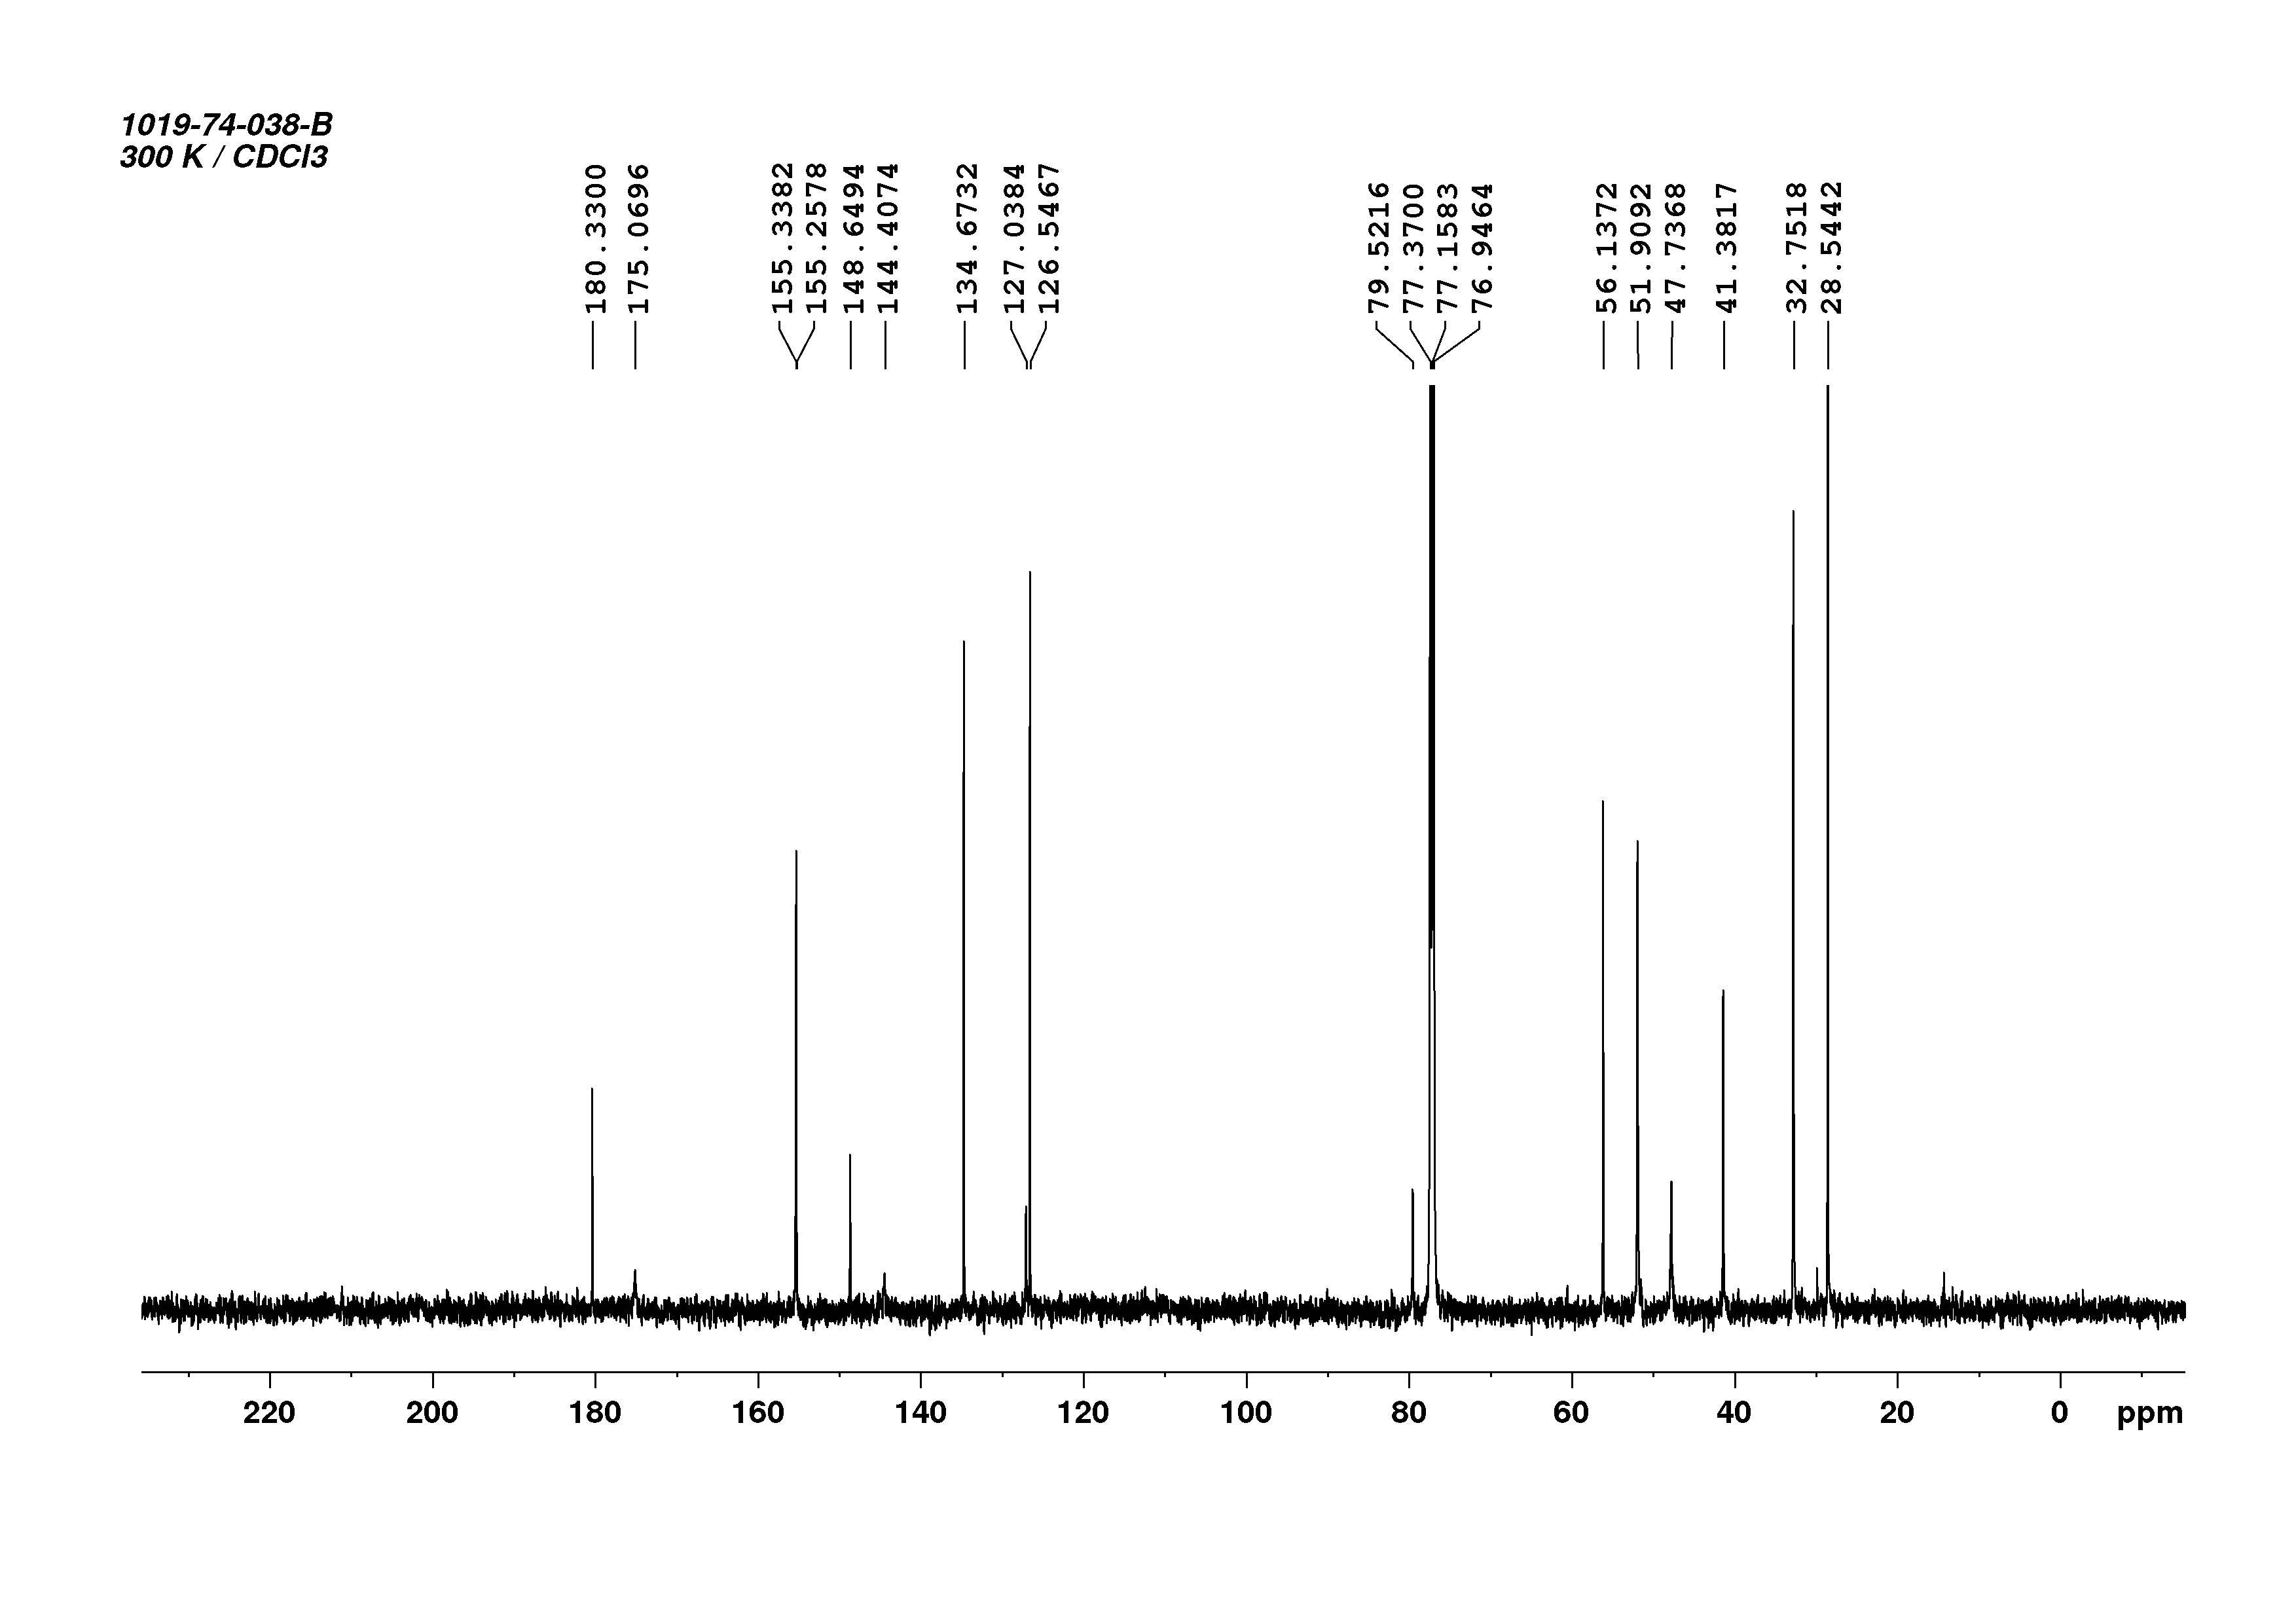


13C-NMR spectrum of compound **D9b**

**
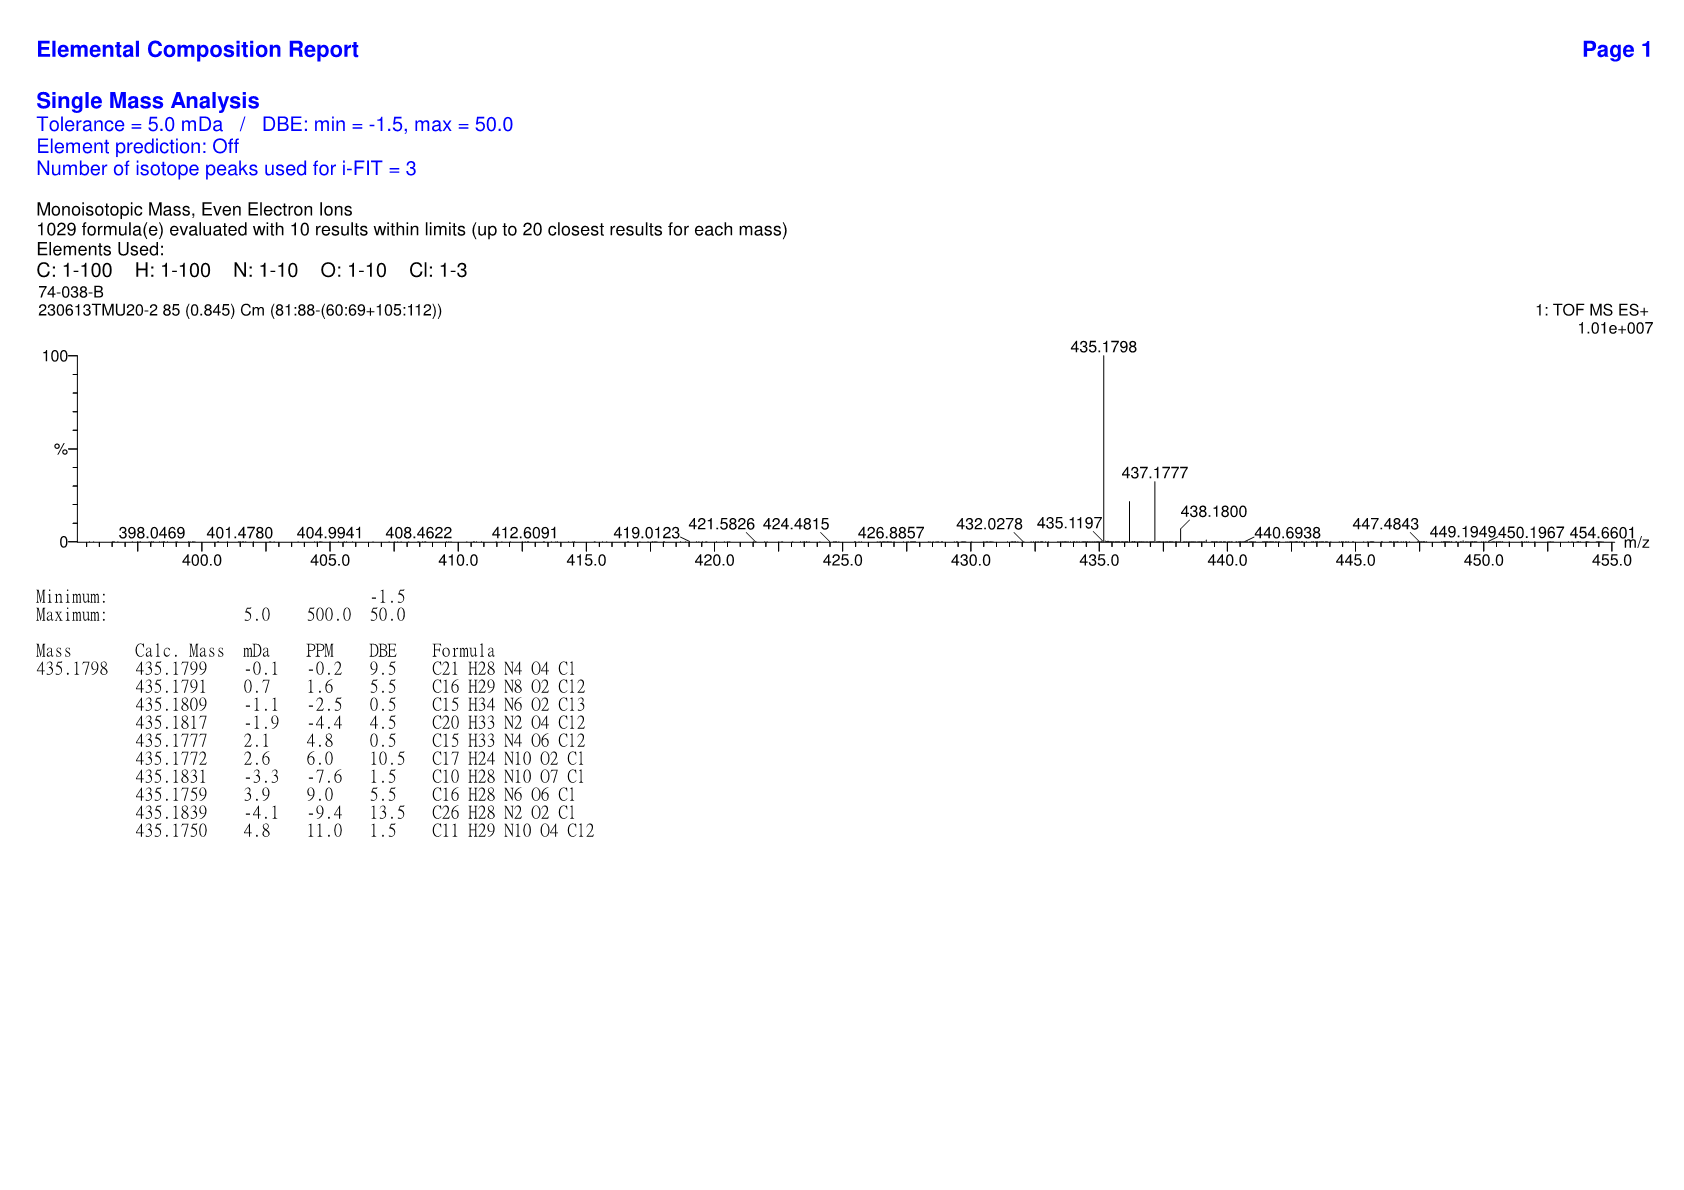
**

HRMS spectrum of compound **D9b**


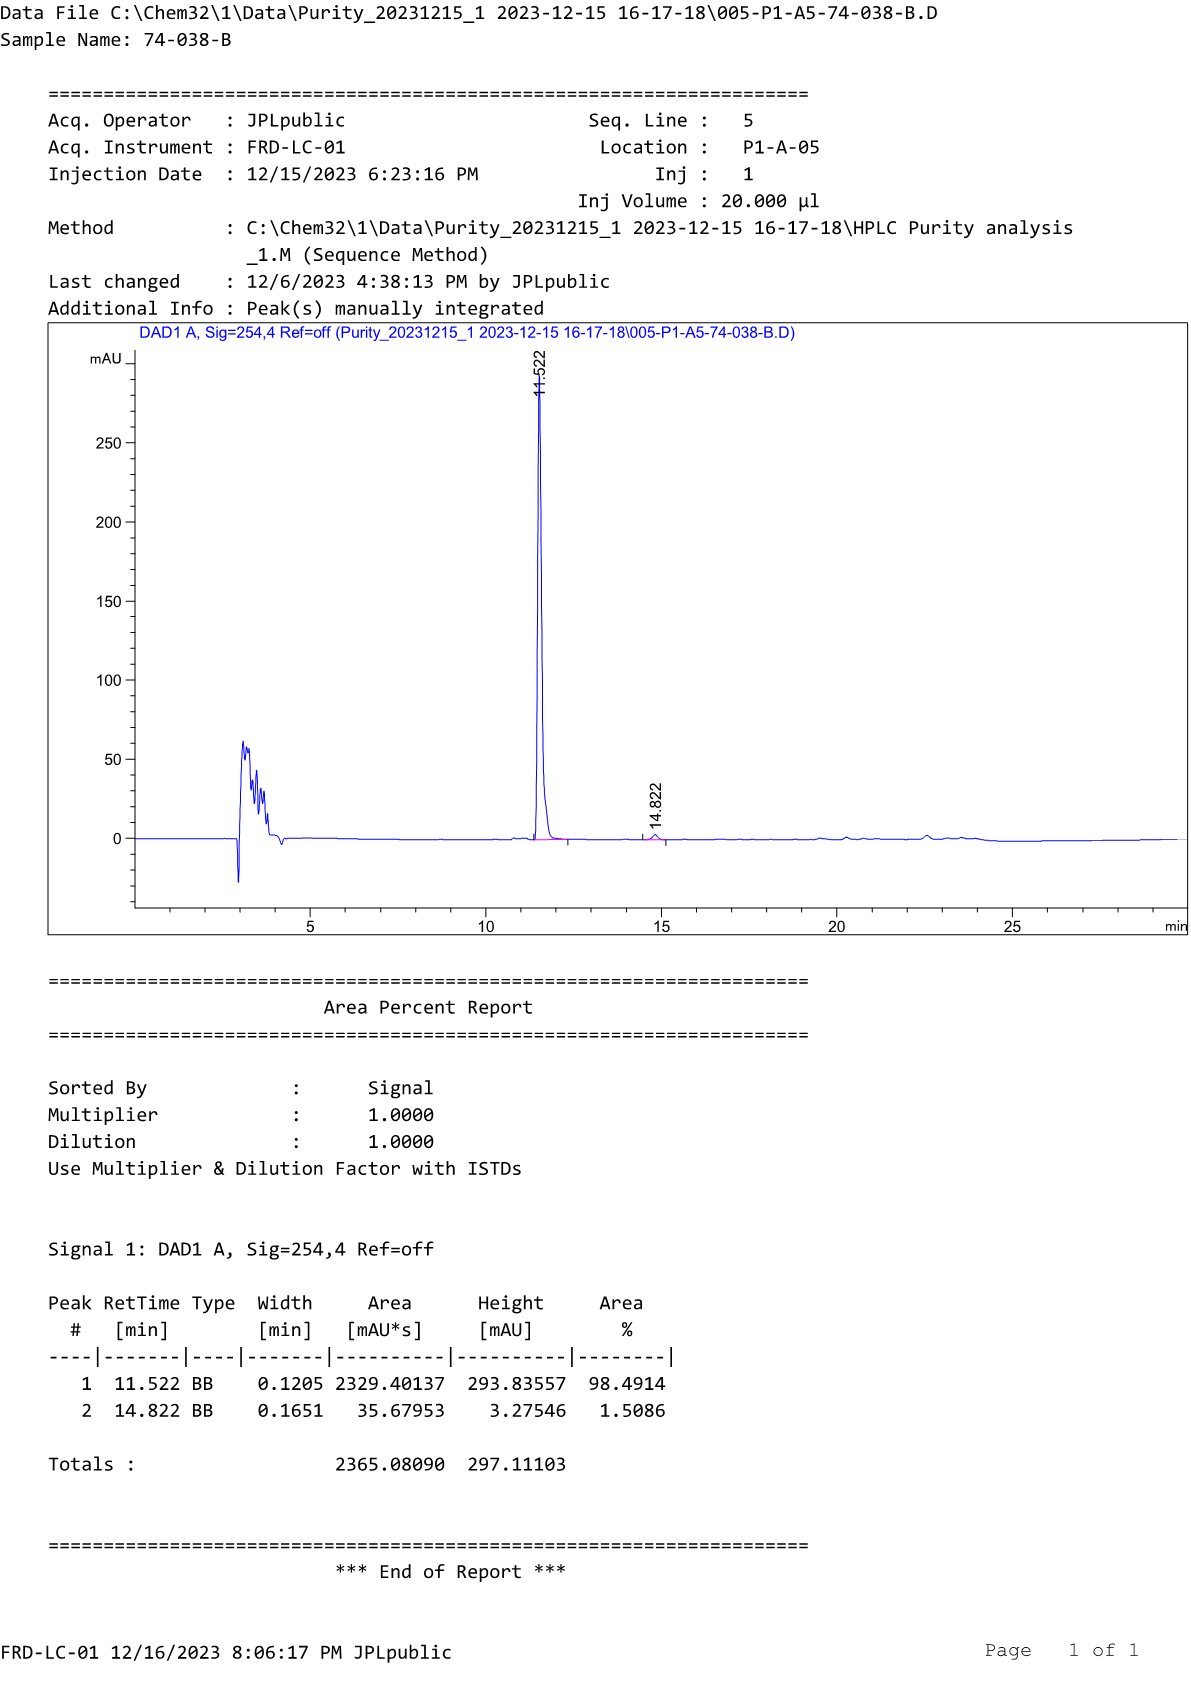


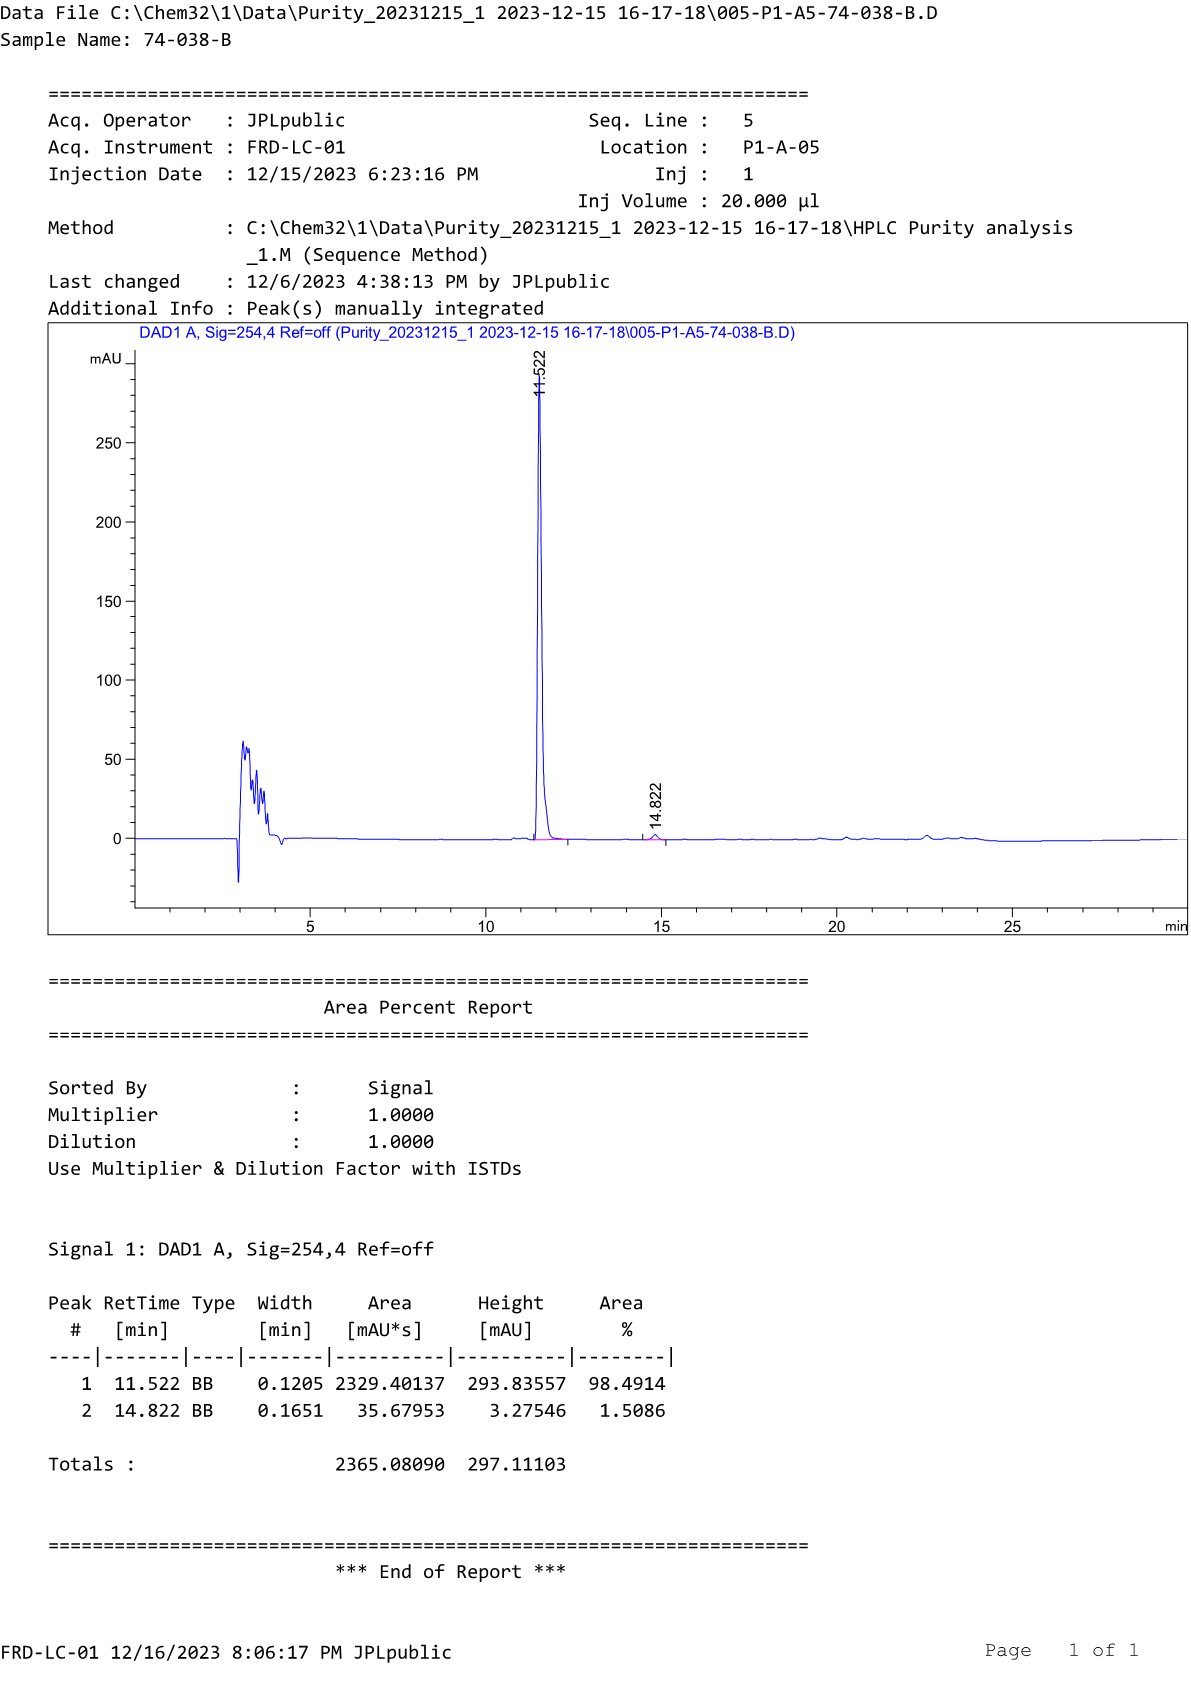


HPLC profile of compound **D9b**


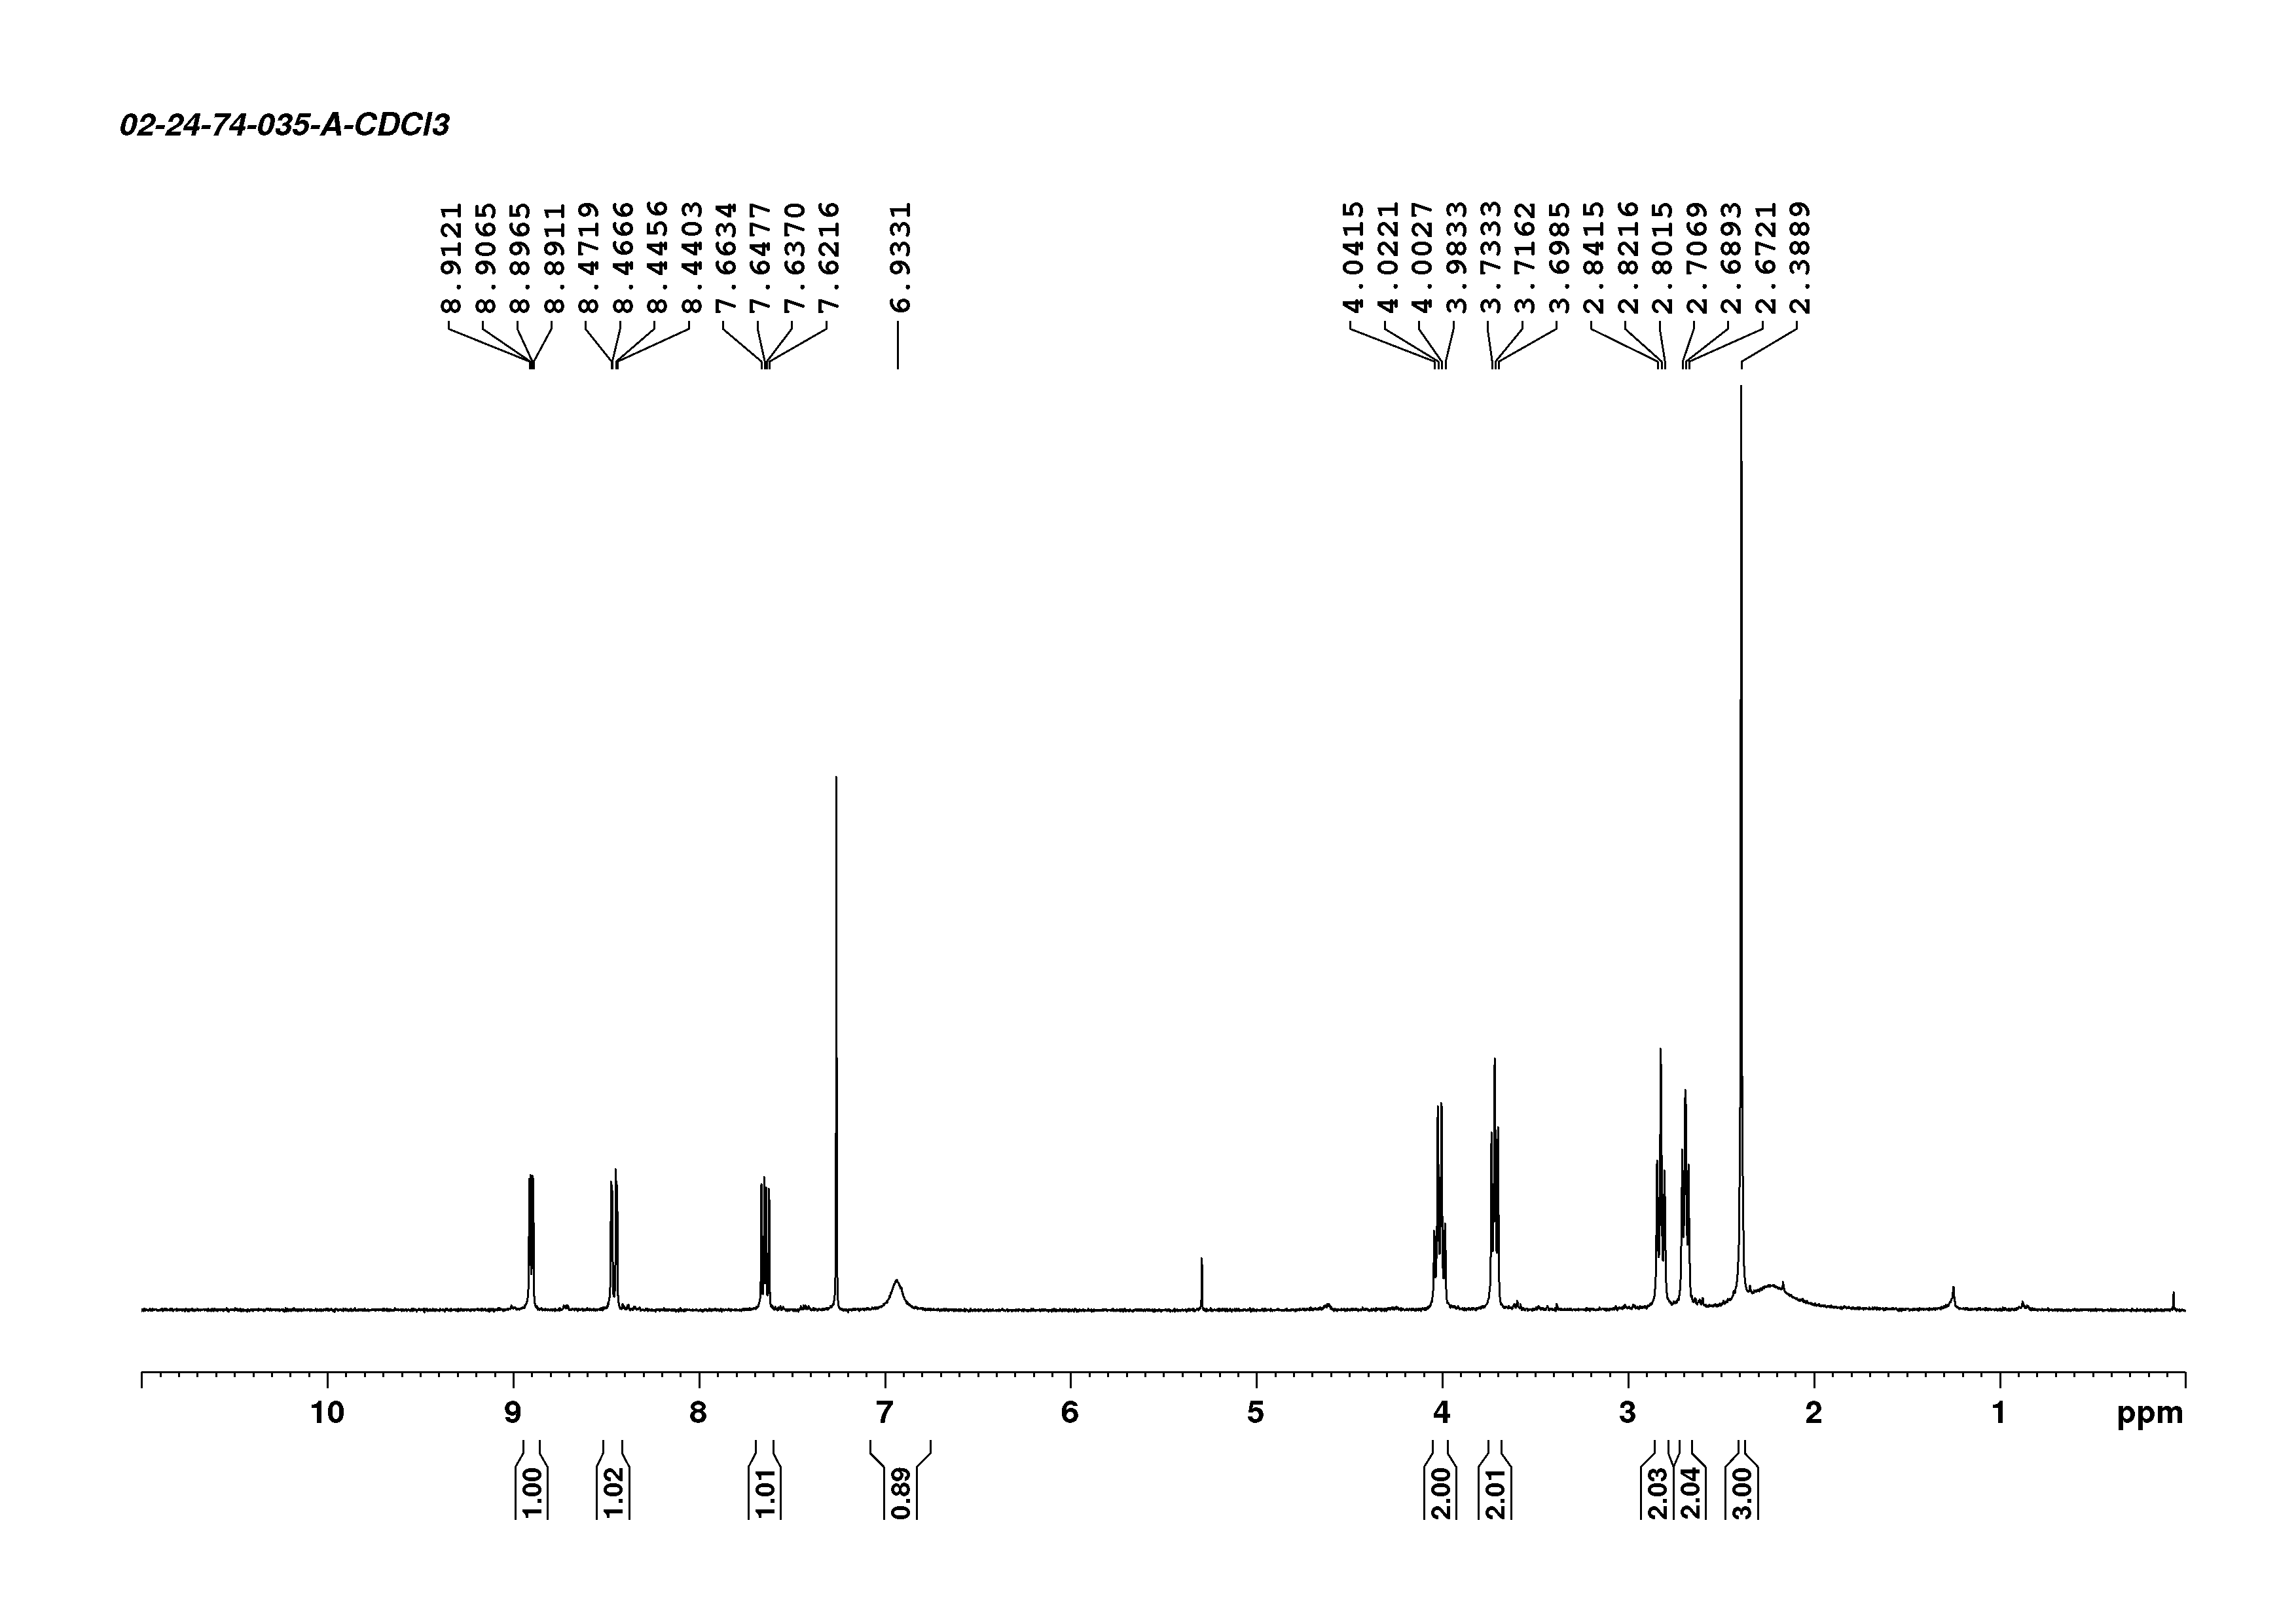


1H-NMR spectrum of compound **D10a**


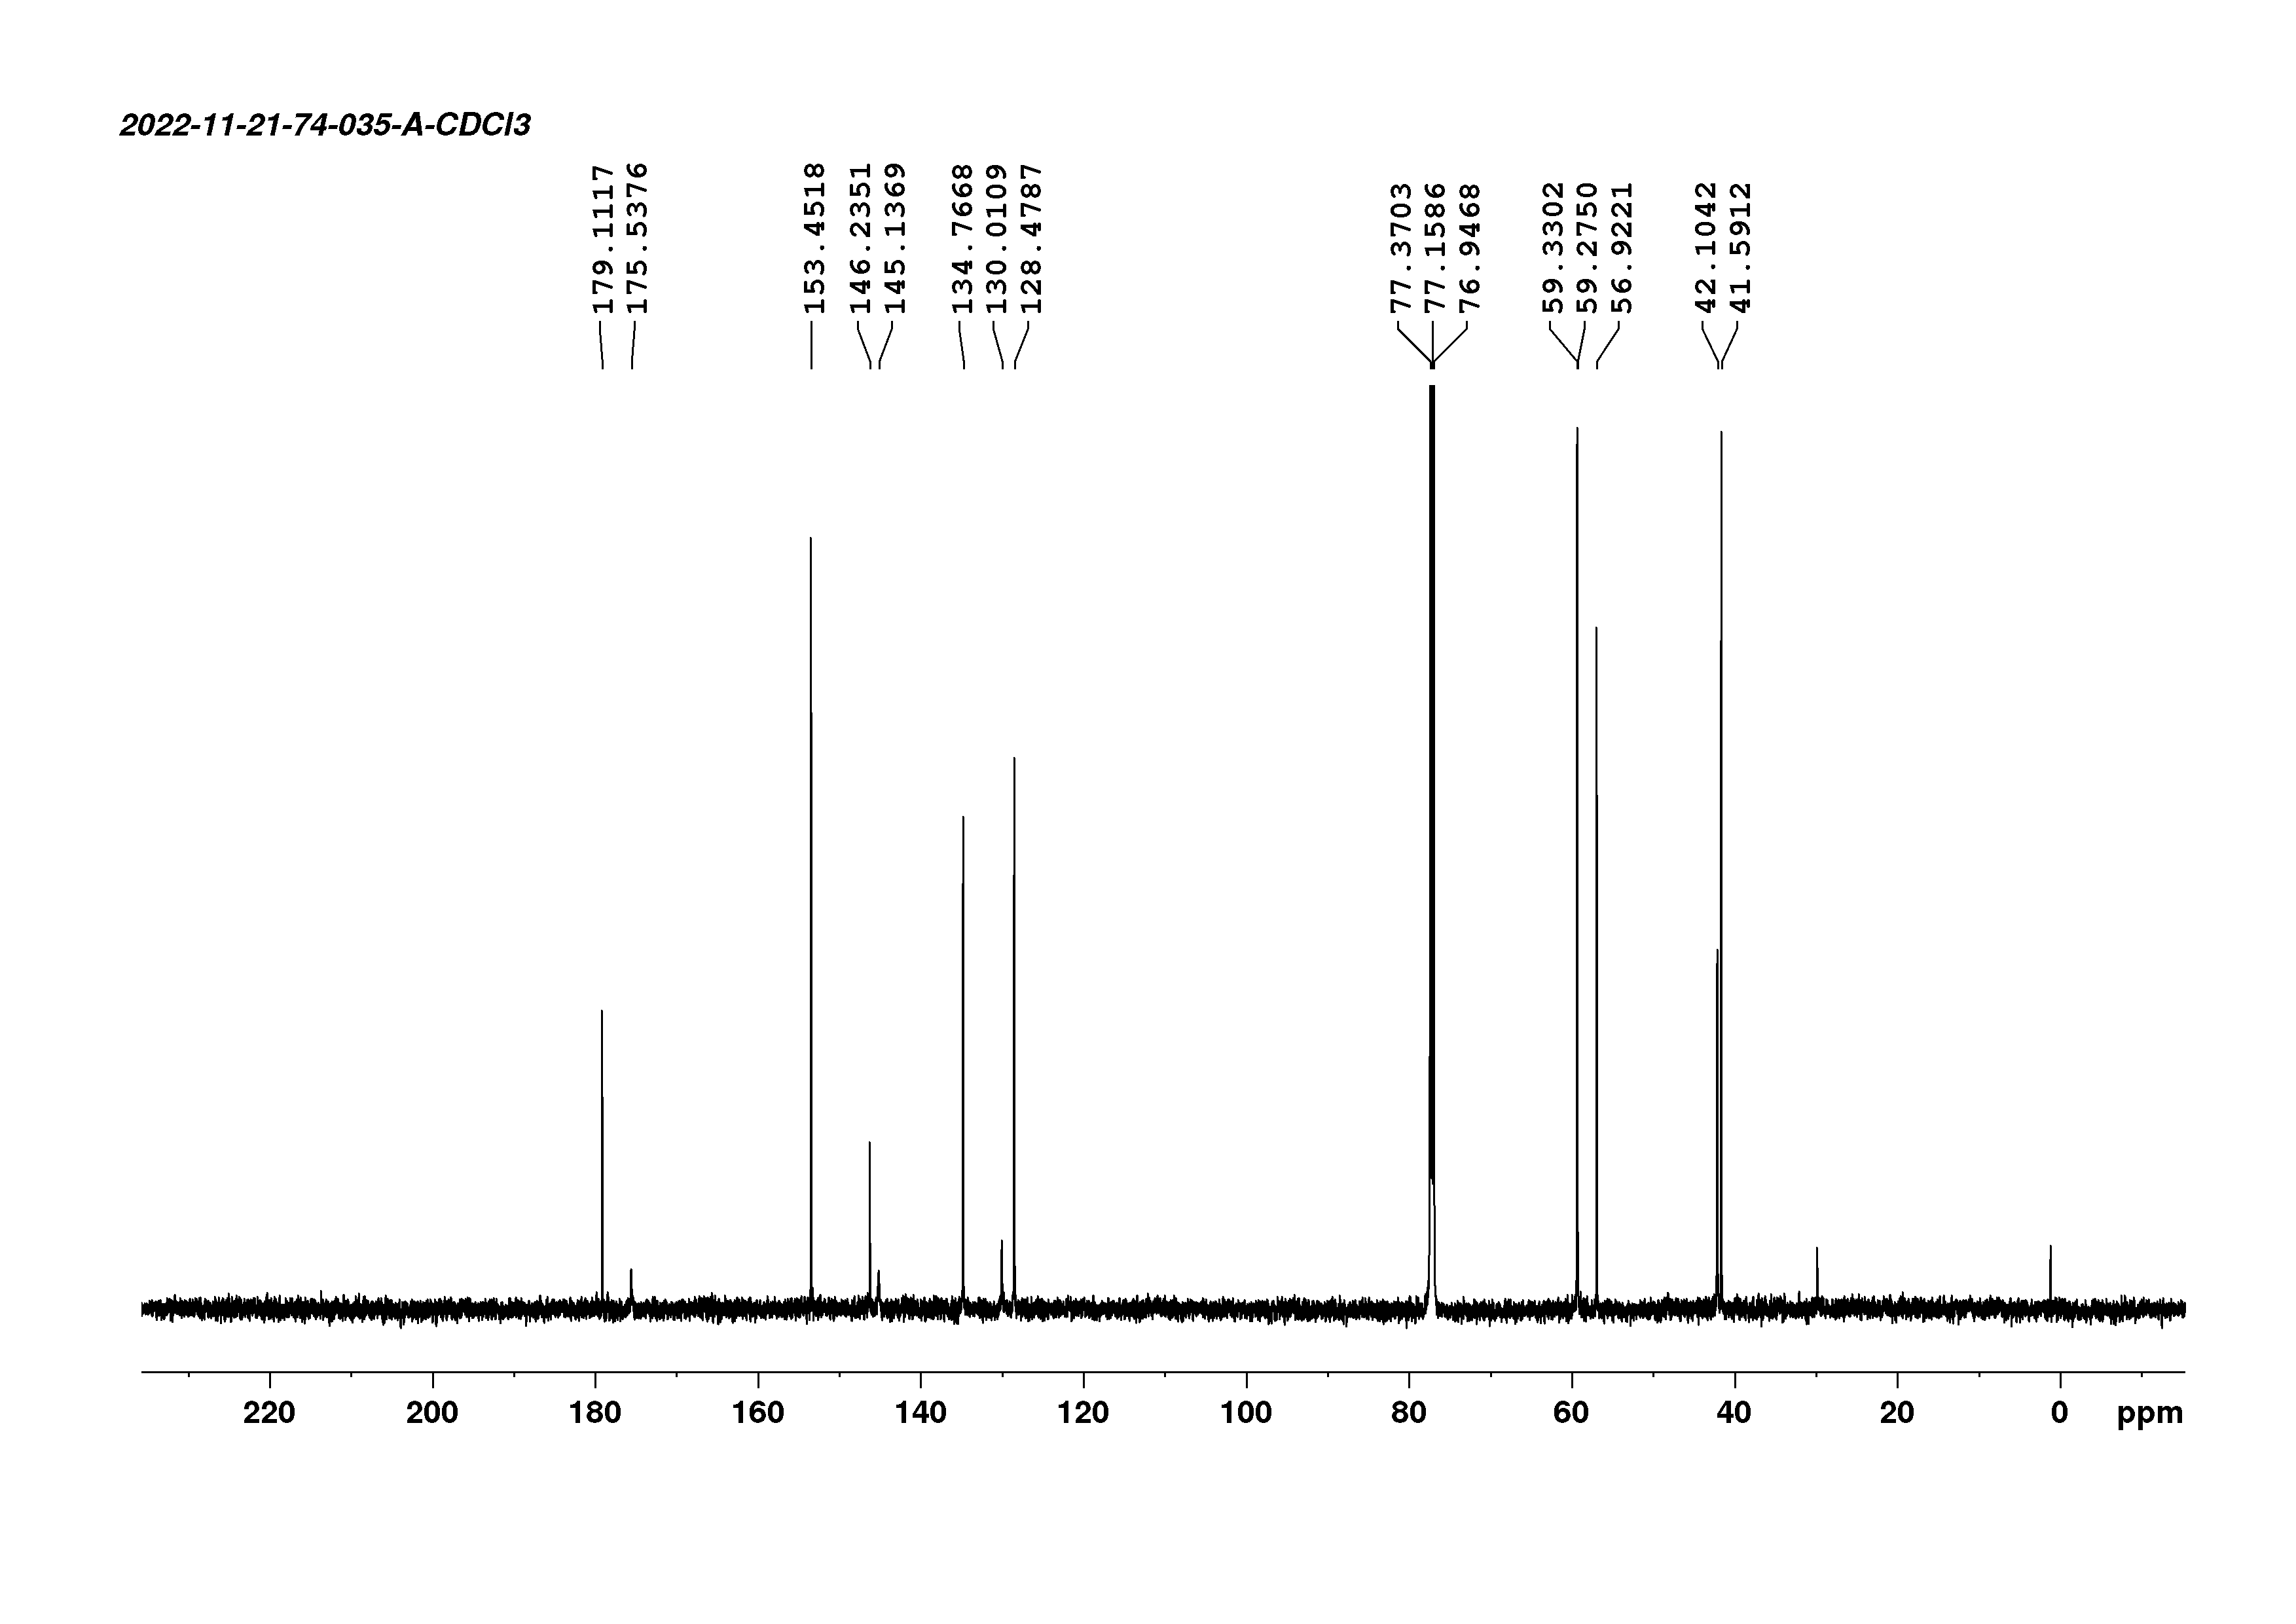


13C-NMR spectrum of compound **D10a**

**
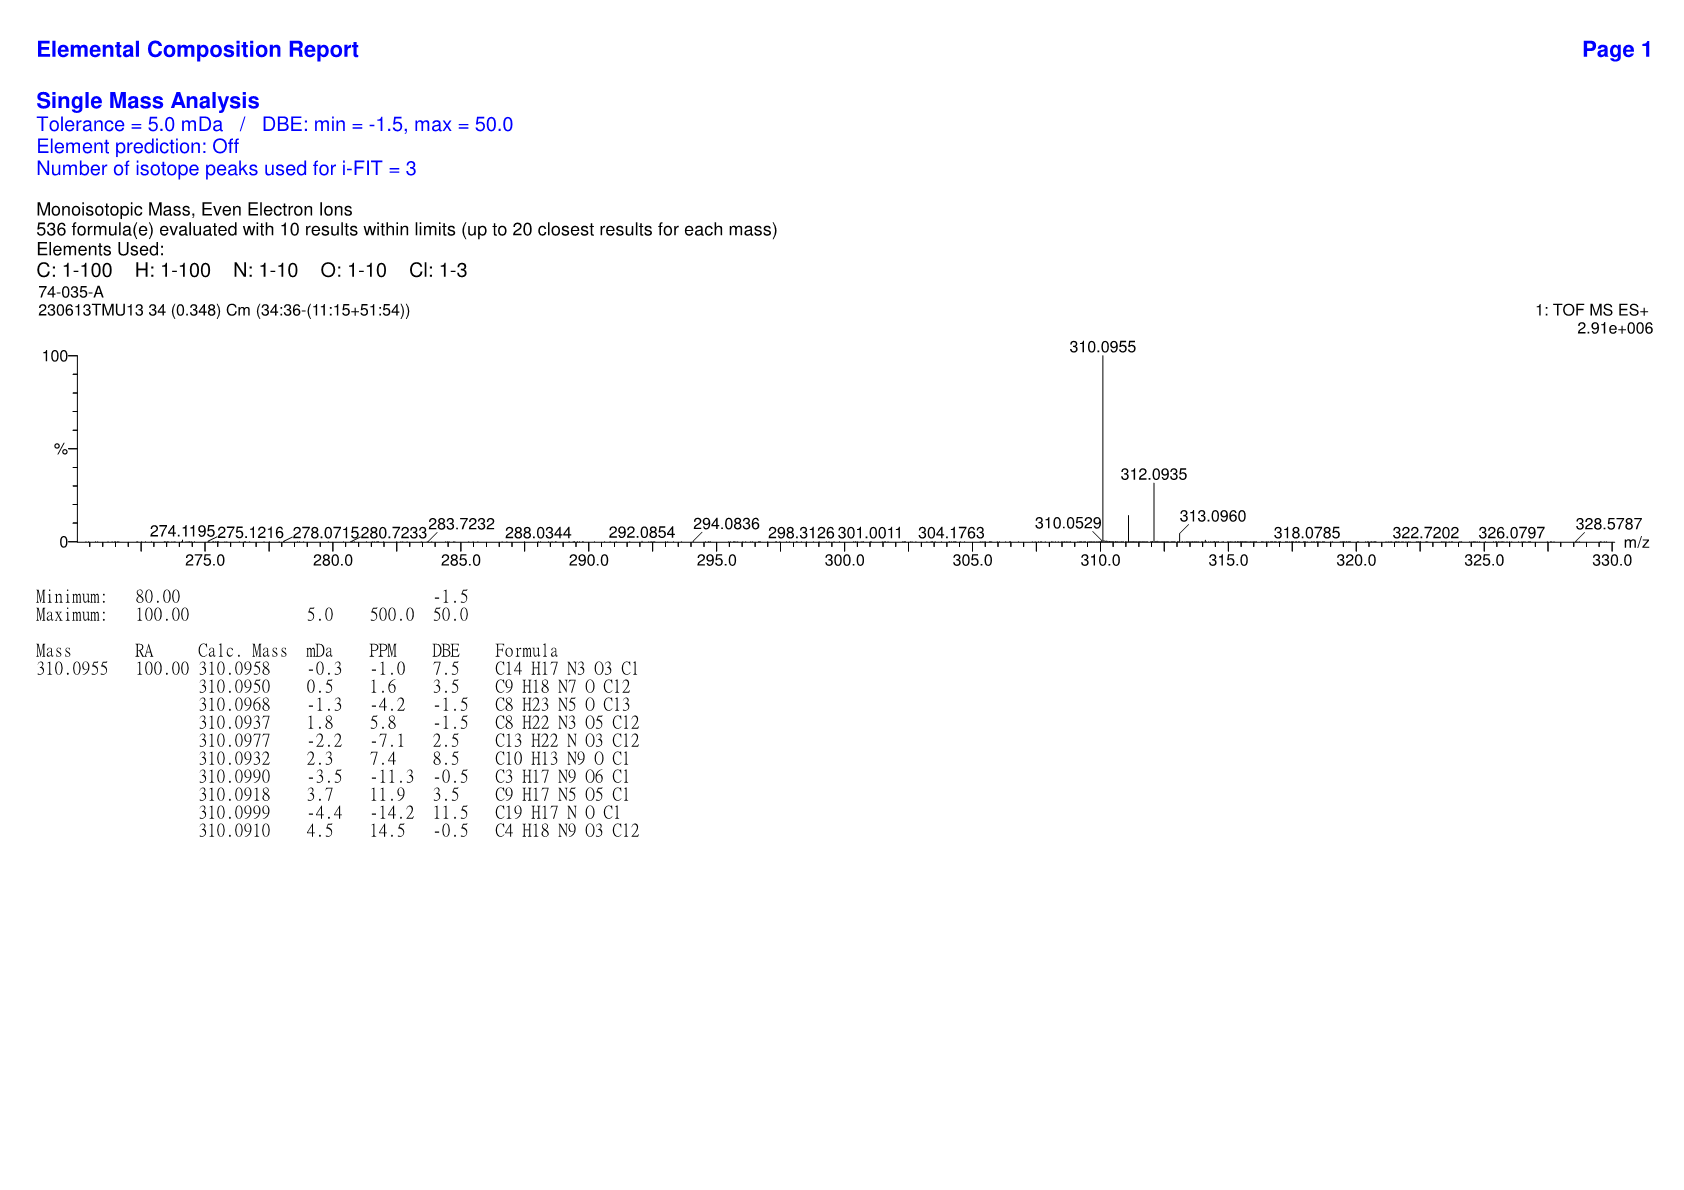
**

HRMS spectrum of compound **D10a**

HPLC profile of compound **D10a**

1H-NMR spectrum of compound **D10b**

13C-NMR spectrum of compound **D10b**

HRMS spectrum of compound **D10b**

HPLC profile of compound **D10b**

1H-NMR spectrum of compound **D11a**

13C-NMR spectrum of compound **D11a**

HRMS spectrum of compound **D11a**

HPLC profile of compound **D11a**

1H-NMR spectrum of compound **D11b**

13C-NMR spectrum of compound **D11b**

HRMS spectrum of compound **D11b**

HPLC profile of compound **D11b**

1H-NMR spectrum of compound **D12a**

13C-NMR spectrum of compound **D12a**

HRMS spectrum of compound **D12a**

HPLC profile of compound **D12a**

1H-NMR spectrum of compound **D12b**

13C-NMR spectrum of compound **D12b**

HRMS spectrum of compound **D12b**

HPLC profile of compound **D12b**

Table S3. Physicochemical properties, [pharmacokinetic properties](https://www.sciencedirect.com/topics/biochemistry-genetics-and-molecular-biology/pharmacokinetic-properties), and drug-likeness of compounds **6a, 6b, D1b, D3a, D3b, D11a,** and **D11b** calculated using the web-based SwissADME tool

| Compounds | Molecular Formula | MW | HBDa | HBAb | RBc | TPSAd (Å2) | ClogPe | SClassf | GIAg | BBBPh | Drug-likeness (#violation)[i](https://www.sciencedirect.com/science/article/pii/S0223523420311089" \l "tbl4fnk) | Bioavailability Score |
| --- | --- | --- | --- | --- | --- | --- | --- | --- | --- | --- | --- | --- |
| **6a** | C15H16ClN3O3 | 321.76 | 1 | 5 | 4 | 71.53 | 1.03 | S | High | No | Yes (0) | 0.55 |
| **6b** | C15H16ClN3O3 | 321.76 | 1 | 5 | 4 | 71.53 | 1.04 | S | High | No | Yes (0) | 0.55 |
| **D1b** | C15H16ClN3O2S | 337.82 | 1 | 4 | 4 | 87.60 | 1.61 | S | High | No | Yes (0) | 0.55 |
| **D3a** | C17H20ClN3O2 | 333.81 | 1 | 4 | 4 | 62.30 | 2.18 | S | High | Yes | Yes (0) | 0.55 |
| **D3b** | C17H20ClN3O2 | 333.81 | 1 | 4 | 4 | 62.30 | 2.16 | S | High | Yes | Yes (0) | 0.55 |
| **D11a** | C13H14ClN3O2 | 279.72 | 1 | 4 | 4 | 62.30 | 1.18 | S | High | Yes | Yes (0) | 0.55 |
| **D11b** | C13H14ClN3O2 | 279.72 | 1 | 4 | 4 | 62.30 | 1.2 | S | High | Yes | Yes (0) | 0.55 |

a HBD : number of H-bond donors

b HBA : number of H-bond acceptors

c RB : number of rotatable bonds

d TPSA : topological polar surface area

e CLogP : consensus Log P (average of iLOGP, XLOGP3, WLOGP, MLOGP, and Silicos-IT Log P)

f Sclass : ESOL solubility class, S means soluble

g GIA : gastrointestinal absorption

h BBBP : blood-brain barrier permeability.

i Drug-like : drug-likeness indices (bioavailability) from Lipinski, Ghose, Veber, Egan, and Muegge filters.

#Violation : number of violations of the 5 filters.
